# Supplementary material for: Ligandless nickel-catalyzed transfer hydrogenation of alkenes and alkynes using water as the hydrogen donor
Source: Royal Society of Chemistry journal article supplement (doi:10.1039/c9qo00616h), 2019-01-01

**Supporting Information for**  
**Ligandless Nickel-Catalyzed Transfer Hydrogenation of Alkenes and Alkynes Using**  
**Water as the Hydrogen Donor**

Xiaoping Hu,<sup>†,a</sup> Gaonan Wang,<sup>†,a</sup> Chunxiang Qin,<sup>‡</sup> Xin Xie,<sup>†</sup> Chunli Zhang,<sup>†</sup> Wei Xu<sup>†</sup> and  
Yuanhong Liu<sup>\*†</sup>

<sup>†</sup>State Key Laboratory of Organometallic Chemistry, Center for Excellence in Molecular  
Synthesis, Shanghai Institute of Organic Chemistry, University of Chinese Academy of  
Sciences, Chinese Academy of Sciences, 345 Lingling Lu, Shanghai 200032, People's  
Republic of China.

<sup>‡</sup>Department of Chemistry, Shanghai University, 99 Shang-Da Road, Shanghai 200444, P. R.  
China.

*Fax: (+86) 21-64166128, E-mail: [yhliu@sioc.ac.cn](mailto:yhliu@sioc.ac.cn)*

<sup>a</sup>These authors contributed equally to this work.

| <b>Contents</b>                                                                                   | <b>Page</b> |
|---------------------------------------------------------------------------------------------------|-------------|
| General Methods                                                                                   | S2          |
| Synthesis of alkenes                                                                              | S2-S4       |
| Optimization studies for transfer hydrogenation of aryl alkenes                                   | S4-S6       |
| Ni-Catalyzed transfer hydrogenation of aryl/heteroaryl alkenes,<br>alkyl alkenes and heterocycles | S6-S25      |
| Ni-Catalyzed transfer hydrogenation of alkynes                                                    | S25-S31     |
| Control experiments                                                                               | S31-S35     |
| 1 mmol scale reaction                                                                             | S35-S36     |
| References                                                                                        | S36-S38     |
| X-ray crystallographic structure and data for compound <b>10c</b>                                 | S38-S51     |
| NMR spectra of new compounds                                                                      | S52-S159    |

**General Methods.** Unless noted, all reactions were carried out using standard Schlenk technique under an argon atmosphere or a dry box technique under a nitrogen atmosphere. Tetrahydrofuran was distilled from sodium and benzophenone. 1,4-Dioxane was distilled from sodium. Acetonitrile was dried using Innovative Technology Solvent Purifier. Ni(COD)<sub>2</sub>, NiI<sub>2</sub>, Ni(acac)<sub>2</sub> and NiF<sub>2</sub> were purchased from Strem Chemicals Inc. NiCl<sub>2</sub>(DME) was purchased from Sigma-Aldrich. NiCl<sub>2</sub>·6H<sub>2</sub>O and NiCl<sub>2</sub> were purchased from Alfa Aesar. Zinc powder (98%, -325 mesh) was purchased from Adamas. Zinc flake (99.8%, -325 mesh) and Mn powder (APS<10 micron, 99.6% metals basis) were purchased from Alfa Aesar. Al powder (200 mesh) and Mg turning (99.9+%) were purchased from Acros Organics. Before using, zinc powder and zinc flake were stirred with 1 M HCl aqueous solution, filtered and washed thoroughly with water, acetone and diethyl ether and dried under vacuum. The deionized water was deoxygenated by argon gas bubbling method prior to use. Unless noted, all commercial reagents were used without further purification. <sup>1</sup>H and <sup>13</sup>C NMR spectra were recorded at room temperature in CDCl<sub>3</sub> (containing 0.03% TMS) on Varian or Agilent XL-400 MHz spectrometer. <sup>1</sup>H NMR spectra was recorded with tetramethylsilane (δ = 0.00 ppm); <sup>13</sup>C NMR spectra was recorded with CDCl<sub>3</sub> (δ = 77.00 ppm) as internal reference. High-resolution mass spectra were obtained by using Waters Micromass GCT Premier mass spectrometer, Agilent Technologies 6224 TOF LC/MS or Thermo Fisher Scientific LTQ FT Ultra mass spectrometers. The IR spectra were measured on a ThermoFisher Nicolet FT-IR spectrometer. H<sub>2</sub> gas analysis was acquired on Agilent 6890Plus gas chromatograph equipped with a Thermal Conductivity Detector.

Alkenes were synthesized according to the published methods. The spectral data of known compounds were in agreement with the literature. For the synthesis of new alkenes **1o** and **5d**, see the following:

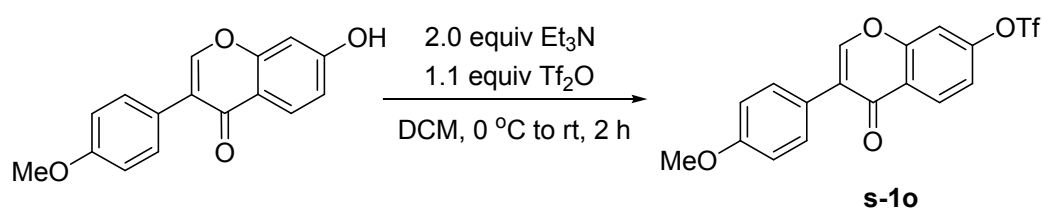

To a solution of 7-hydroxy-3-(4-methoxyphenyl)-4*H*-chromen-4-one (2.68 g, 10 mmol) and Et<sub>3</sub>N (2.02 g, 20 mmol) in DCM (50 mL) was added Tf<sub>2</sub>O (3.10 g, 11 mmol) at 0 °C under Argon, then the mixture was warmed up to room temperature and stirred for another 2 h. The reaction was quenched with saturated NH<sub>4</sub>Cl and extracted with DCM. The combined organic layers were dried over Na<sub>2</sub>SO<sub>4</sub>, filtered and concentrated in vacuum. The residue was purified by column chromatography on silica gel (eluent: dichloromethane/ petroleum ether = 2:1) to give 3-(4-methoxyphenyl)-4-oxo-4*H*-chromen-7-yl trifluoromethanesulfonate (**s-1o**) in 69% yield (2.76 g) as a white solid. M.p.: 125.0-126.3 °C. <sup>1</sup>H NMR (400 M, CDCl<sub>3</sub>): δ 8.40 (d, *J* = 8.8 Hz, 1H), 8.01 (s, 1H), 7.49 (d, *J* = 8.8 Hz, 2H), 7.45 (d, *J* = 2.0 Hz, 1H), 7.33 (dd, *J* = 8.8, 2.4 Hz, 1H), 6.97 (d, *J* = 8.8 Hz, 2H), 3.84 (s, 3H). <sup>13</sup>C NMR (100 M, CDCl<sub>3</sub>): δ 175.11, 159.86, 156.27, 152.80, 152.02, 130.00, 129.12, 125.62, 124.14, 123.08, 118.63 (q, <sup>1</sup>*J*<sub>C-F</sub> = 321.3 Hz), 118.47, 114.04, 111.39, 55.26. IR (neat): 3097, 3076, 3058, 2954, 2907, 2836, 1644, 1612, 1568, 1516, 1424, 1400, 1292, 1250, 1212, 1182, 1168, 1132, 1095, 1029, 952, 883, 864, 824, 801, 788, 782, 689, 659 cm<sup>-1</sup>. HRMS (ESI) calcd for C<sub>17</sub>H<sub>12</sub>F<sub>3</sub>O<sub>6</sub>S [M+H]<sup>+</sup>: 401.0301, found 401.0298.

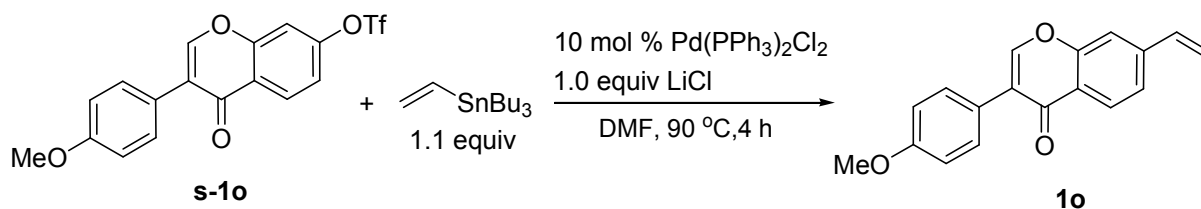

To a solution of **s-1o** (1.20 g, 3 mmol), Pd(PPh<sub>3</sub>)<sub>2</sub>Cl<sub>2</sub> (210.6 mg, 0.3 mmol) and LiCl (127.2 mg, 3 mol) in DMF (18 mL) was added tributyl(vinyl)stannane (1.05 g, 3.3 mmol) dropwise under Argon. The mixture was heated at 90 °C for 4 h. After completion the reaction mixture was cooled down to room temperature and diluted with Et<sub>2</sub>O and washed with 1 M HCl (aq.), then washed with saturated NaHCO<sub>3</sub>(aq.) and brine. The combined aqueous layers were extracted once with Et<sub>2</sub>O. The combined organic layers were dried over Na<sub>2</sub>SO<sub>4</sub>, filtered and concentrated in vacuum. The residue was purified by column chromatography on silica gel (eluent: petroleum ether/dichloromethane/ethyl acetate = 6:1:1) to give 3-(4-methoxyphenyl)-7-vinyl-4*H*-chromen-4-one (**1o**) in 76% yield (637.7 mg) as a white solid. M.p.: 154.0-155.1 °C. <sup>1</sup>H NMR (400 M, CDCl<sub>3</sub>): δ 8.24 (d, *J* = 8.4 Hz, 1H), 7.96 (s, 1H),

7.52-7.46 (m, 3H), 7.41 (s, 1H), 6.98-6.96 (m, 2H), 6.79 (dd,  $J = 17.6, 11.2$  Hz, 1H), 5.94 (d,  $J = 17.6$ , Hz, 1H), 5.48 (d,  $J = 11.2$  Hz, 1H), 3.83 (s, 3H).  $^{13}\text{C}$  NMR (100 M,  $\text{CDCl}_3$ ):  $\delta$  176.06, 159.55, 156.44, 152.49, 142.89, 135.32, 130.02, 126.49, 124.97, 124.03, 123.62, 122.83, 117.81, 115.37, 113.91, 55.26. IR (neat): 3092, 3076, 3040, 3011, 2972, 2930, 2838, 1624, 1609, 1557, 1513, 1439, 1407, 1358, 1291, 1253, 1233, 1176, 1106, 1024, 985, 927, 901, 886, 878, 830, 821, 802, 791, 767, 717  $\text{cm}^{-1}$ . HRMS (ESI) calcd for  $\text{C}_{18}\text{H}_{15}\text{O}_3$   $[\text{M}+\text{H}]^+$ : 279.1016, found 279.1007.

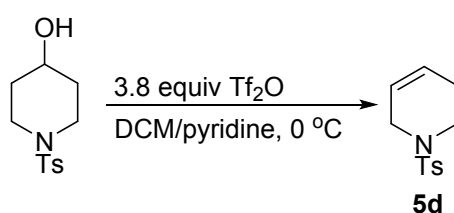

To a solution of 1-tosylpiperidin-4-ol (1.79 g, 7 mmol) in DCM (50 mL) was added pyridine (12.5 mL). Then the mixture was cooled to 0 °C and  $\text{Tf}_2\text{O}$  (4.48 mL, 26.6 mmol) was slowly added. Then the mixture was stirred for 3 h at 0 °C. The reaction mixture was quenched by  $\text{H}_2\text{O}$  and extracted with DCM. The combined organic layers were dried over anhydrous  $\text{Na}_2\text{SO}_4$ . The mixture was filtered and the solvent was evaporated under the reduced pressure. The residue was purified by column chromatography on silica gel (eluent: petroleum ether/DCM = 1/1 to DCM) to afford 1-tosyl-1,2,3,6-tetrahydropyridine (**5d**) in 46% yield (762.3 mg) as a white solid.  $^1\text{H}$  NMR (400 MHz,  $\text{CDCl}_3$ ):  $\delta$  7.68 (d,  $J = 8.4$  Hz, 2H), 7.32 (d,  $J = 8.0$  Hz, 2H), 5.76-5.73 (m, 1H), 5.63-5.60 (m, 1H), 3.59-3.56 (m, 2H), 3.17 (t,  $J = 5.6$  Hz, 2H), 2.43 (s, 3H), 2.24-2.18 (m, 2H).  $^{13}\text{C}$  NMR (100 MHz,  $\text{CDCl}_3$ ):  $\delta$  143.44, 133.18, 129.55, 127.59, 124.97, 122.65, 44.70, 42.56, 25.17, 21.43. The spectroscopic data are in agreement with that previously reported.<sup>1</sup>

## Optimization studies for transfer hydrogenation of aryl alkenes.

### General procedure for optimization studies.

The reaction was conducted in an oven-dried screw-cap vial (4 mL) equipped with a magnetic stir bar. In a nitrogen-filled glove box,  $\text{NiCl}_2 \cdot 6\text{H}_2\text{O}$  (3.6 mg, 0.015 mmol) [or other Ni(II) salts], Zinc powder (39.2 mg, 0.6 mmol) [or other reductants], 2-vinylnaphthalene (46.3

mg, 0.3 mmol), dioxane or other solvents (1.5 mL) were added sequentially to a screw-cap vial. The vial cap was then securely fitted and taken outside the glove box. Then H<sub>2</sub>O (0.3 mL or x mL) was added to the vial. After the reaction mixture was stirred at 80 °C, the mixture was filtered through a pad of silica gel and washed with petroleum ether. The solvent was evaporated under the reduced pressure and the residue was dissolved in CDCl<sub>3</sub>. The NMR yields were obtained by <sup>1</sup>H NMR analysis of the crude mixture using 1,3,5-trimethoxybenzene (50.5 mg, 0.3 mmol) as an internal standard.

**Note:** NiCl<sub>2</sub>·6H<sub>2</sub>O used in the optimization study was stored under air (outside of glove box), which was brought into the glove box and used immediately for every experiment.

**Table 1.** Optimization of the reaction conditions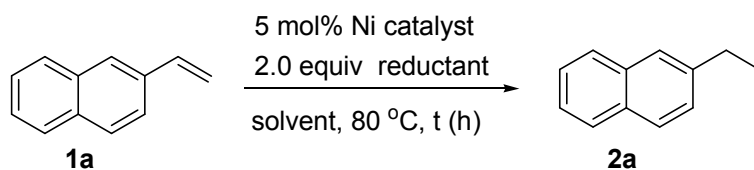

| entry           | catalyst                             | reductant | solvent                                   | time (h) | yield (%) <sup>a</sup> |
|-----------------|--------------------------------------|-----------|-------------------------------------------|----------|------------------------|
| 1               | NiCl <sub>2</sub> ·6H <sub>2</sub> O | Zn        | dioxane/H <sub>2</sub> O (5/1)            | 10       | 88                     |
| 2               | NiCl <sub>2</sub>                    | Zn        | dioxane/H <sub>2</sub> O (5/1)            | 10       | 89                     |
| 3               | NiBr <sub>2</sub>                    | Zn        | dioxane/H <sub>2</sub> O (5/1)            | 10       | 89                     |
| 4               | NiI <sub>2</sub>                     | Zn        | dioxane/H <sub>2</sub> O (5/1)            | 10       | 79 (7)                 |
| 5               | NiF <sub>2</sub>                     | Zn        | dioxane/H <sub>2</sub> O (5/1)            | 10       | 2 (85)                 |
| 6               | Ni(acac) <sub>2</sub>                | Zn        | dioxane/H <sub>2</sub> O (5/1)            | 10       | - (89)                 |
| 7               | NiCl <sub>2</sub> ·6H <sub>2</sub> O | Al        | dioxane/H <sub>2</sub> O (5/1)            | 10       | 24 (68)                |
| 8               | NiCl <sub>2</sub> ·6H <sub>2</sub> O | Mn        | dioxane/H <sub>2</sub> O (5/1)            | 10       | 13 (81)                |
| 9               | NiCl <sub>2</sub> ·6H <sub>2</sub> O | Mg        | dioxane/H <sub>2</sub> O (5/1)            | 10       | - (96)                 |
| 10              | NiCl <sub>2</sub> ·6H <sub>2</sub> O | Zn        | DMF/H <sub>2</sub> O (5/1)                | 10       | 90 (1)                 |
| 11              | NiCl <sub>2</sub> ·6H <sub>2</sub> O | Zn        | THF/H <sub>2</sub> O (5/1)                | 10       | 95                     |
| 12              | NiCl <sub>2</sub> ·6H <sub>2</sub> O | Zn        | CH <sub>3</sub> CN/H <sub>2</sub> O (5/1) | 10       | 1 (58)                 |
| 13              | NiCl <sub>2</sub> ·6H <sub>2</sub> O | Zn        | dioxane/H <sub>2</sub> O (25/1)           | 10       | 33 (59)                |
| 14              | NiCl <sub>2</sub> ·6H <sub>2</sub> O | Zn        | dioxane/H <sub>2</sub> O (3/1)            | 10       | 96                     |
| 15              | NiCl <sub>2</sub> ·6H <sub>2</sub> O | Zn        | dioxane/H <sub>2</sub> O (3/1)            | 5        | 95                     |
| 16 <sup>b</sup> | NiCl <sub>2</sub> ·6H <sub>2</sub> O | Zn        | dioxane/H <sub>2</sub> O (3/1)            | 5        | 48 (48)                |
| 17 <sup>c</sup> | NiCl <sub>2</sub> ·6H <sub>2</sub> O | Zn        | dioxane/H <sub>2</sub> O (3/1)            | 5        | 32 (63)                |
| 18              | -                                    | Zn        | dioxane/H <sub>2</sub> O (3/1)            | 5        | - (94)                 |
| 19              | NiCl <sub>2</sub> ·6H <sub>2</sub> O | -         | dioxane/H <sub>2</sub> O (3/1)            | 5        | - (94)                 |

<sup>a</sup>Determined by <sup>1</sup>H NMR using 1,3,5-trimethoxybenzene as an internal standard. The yields of the unreacted **1a** are shown in parentheses. <sup>b</sup>1.0 equiv Zn was used. <sup>c</sup>50 °C.

**Ni-Catalyzed transfer hydrogenation of aryl/heteroaryl alkenes, alkyl alkenes and heterocycles.**

**Typical procedure for the synthesis of 2a.**

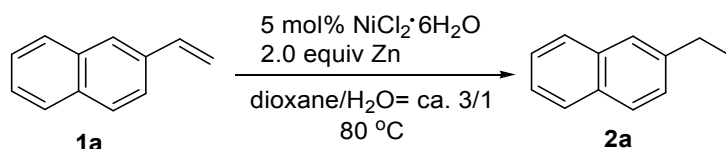

To an oven dried Schlenk tube (25 mL) were added  $\text{NiCl}_2\cdot 6\text{H}_2\text{O}$  (5.9 mg, 0.025 mmol), Zinc powder (65.4 mg, 1.0 mmol), and 2-vinylnaphthalene (77.1 mg, 0.5 mmol) under air. The Schlenk tube was capped with a rubber septum, evacuated and back filled with argon for three times. Then dioxane (2.5 mL) and  $\text{H}_2\text{O}$  (0.8 mL) were added sequentially under argon. (If the starting material is a liquid, after the  $\text{NiCl}_2\cdot 6\text{H}_2\text{O}$  and Zinc were added, the Schlenk tube was capped with a rubber septum, evacuated and back filled with argon for three times. Then dioxane, the alkene and  $\text{H}_2\text{O}$  were added sequentially under argon). The tube cap was then securely fitted and sealed with electrical tape, and the stopcock valve on the sidearm of the Schlenk tube was closed. After the reaction mixture was stirred at 80 °C for 10 h, it was filtered through a pad of silica gel and washed with petroleum ether. **Note: a stirring speed above 600 rpm is highly important for reproducibility.** The solvent was evaporated under the reduced pressure and the residue was purified by column chromatography on silica gel (eluent: petroleum ether) to give the desired product **2a** in 92% yield (72.0 mg) as a colorless oil.

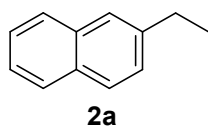

**2-Ethylnaphthalene (2a).**  $^1\text{H}$  NMR (400 MHz,  $\text{CDCl}_3$ ):  $\delta$  7.77-7.71 (m, 3H), 7.58 (s, 1H), 7.42-7.35 (m, 2H), 7.31-7.29 (m, 1H), 2.77 (q,  $J = 7.6$  Hz, 2H), 1.29 (t,  $J = 7.6$  Hz, 3H);  $^{13}\text{C}$  NMR (100 MHz,  $\text{CDCl}_3$ ):  $\delta$  141.69, 133.67, 131.90, 127.77, 127.56, 127.38, 127.04, 125.79, 125.50, 124.97, 29.01, 15.51. The spectroscopic data are in agreement with that previously reported.<sup>2</sup>

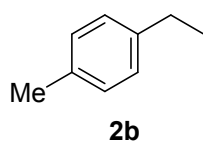

**1-Ethyl-4-methylbenzene (2b).**  $\text{NiCl}_2\cdot 6\text{H}_2\text{O}$  (5.9 mg, 0.025 mmol), Zinc powder (65.4 mg,

1.0 mmol), dioxane (2.5 mL), 1-methyl-4-vinylbenzene (59.1 mg, 0.5 mmol) and H<sub>2</sub>O (0.8 mL) were stirred at 80 °C for 11.5 h. Column chromatography on silica gel (eluent: petroleum ether) afforded the desired product **2b** in 44% yield (26.7 mg) as a colorless oil. <sup>1</sup>H NMR (400 MHz, CDCl<sub>3</sub>): δ 7.09 (s, 4H), 2.61 (q, *J* = 7.2 Hz, 2H), 2.31 (s, 3H), 1.22 (t, *J* = 7.6 Hz, 3H); <sup>13</sup>C NMR (100 MHz, CDCl<sub>3</sub>): δ 141.18, 134.96, 128.97, 127.71, 28.42, 20.96, 15.78. The spectroscopic data are in agreement with that previously reported.<sup>3</sup>

Due to the volatile nature of this compound, the NMR yield was determined. 86% NMR yield of the desired product **2b** was obtained.

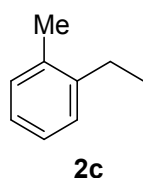

**1-Ethyl-2-methylbenzene(2c).** NiCl<sub>2</sub>·6H<sub>2</sub>O (5.9 mg, 0.025 mmol), Zinc powder (65.4 mg, 1.0 mmol), dioxane (2.5 mL), 1-methyl-2-vinylbenzene (59.1 mg, 0.5 mmol) and H<sub>2</sub>O (0.8 mL) were stirred at 80 °C for 24 h. Column chromatography on silica gel (eluent: petroleum ether) afforded the desired product **2c** in 21% yield (12.5 mg) as a colorless oil. <sup>1</sup>H NMR (400 MHz, CDCl<sub>3</sub>): δ 7.15-7.07 (m, 4H), 2.63 (q, *J* = 7.2 Hz, 2H), 2.31 (s, 3H), 1.21 (t, *J* = 7.6 Hz, 3H); <sup>13</sup>C NMR (100 MHz, CDCl<sub>3</sub>): δ 142.29, 135.73, 129.99, 127.86, 125.98, 125.70, 26.15, 19.15, 14.36. The spectroscopic data are in agreement with that previously reported.<sup>4</sup>

Due to the volatile nature of this compound, the NMR yield was determined. 89% NMR yield of the desired product **2c** was obtained.

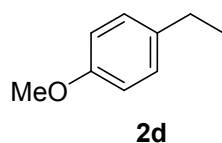

**1-Ethyl-4-methoxybenzene(2d).** NiCl<sub>2</sub>·6H<sub>2</sub>O (5.9 mg, 0.025 mmol), Zinc powder (65.4 mg, 1.0 mmol), dioxane (2.5 mL), 1-methoxy-4-vinylbenzene (67.1 mg, 0.5 mmol) and H<sub>2</sub>O (0.8 mL) were stirred at 80 °C for 10.5 h. Column chromatography on silica gel (eluent: petroleum ether to petroleum ether/ethyl ether = 50:1) afforded the desired product **2d** in 63% yield (42.6 mg) as a colorless oil. <sup>1</sup>H NMR (400 MHz, CDCl<sub>3</sub>): δ 7.11 (d, *J* = 8.4 Hz, 2H), 6.82 (d,

$J = 8.8$  Hz, 2H), 3.77 (s, 3H), 2.58 (q,  $J = 7.6$  Hz, 2H), 1.20 (t,  $J = 7.6$  Hz, 3H);  $^{13}\text{C}$  NMR (100 MHz,  $\text{CDCl}_3$ ):  $\delta$  157.56, 136.33, 128.65, 113.67, 55.18, 27.93, 15.87. The spectroscopic data are in agreement with that previously reported.<sup>4</sup>

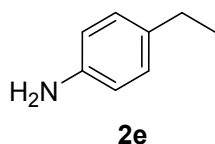

**4-Ethylaniline(2e).**  $\text{NiCl}_2 \cdot 6\text{H}_2\text{O}$  (5.9 mg, 0.025 mmol), Zinc powder (65.4 mg, 1.0 mmol), dioxane (2.5 mL), 4-vinylaniline (59.6 mg, 0.5 mmol) and  $\text{H}_2\text{O}$  (0.8 mL) were stirred at 80 °C for 7 h. The mixture was filtered through a pad of silica gel and washed with ethyl ether. Column chromatography on silica gel (eluent: petroleum ether/ethyl ether = 1:1) afforded the desired product **2e** in 90% yield (54.8 mg) as a yellow oil.  $^1\text{H}$  NMR (400 MHz,  $\text{CDCl}_3$ ):  $\delta$  6.98 (d,  $J = 8.0$  Hz, 2H), 6.61 (d,  $J = 8.4$  Hz, 2H), 3.46 (bs, 2H), 2.53 (q,  $J = 7.6$  Hz, 2H), 1.18 (t,  $J = 7.6$  Hz, 3H);  $^{13}\text{C}$  NMR (100 MHz,  $\text{CDCl}_3$ ):  $\delta$  143.97, 134.31, 128.48, 115.17, 27.88, 15.87. The spectroscopic data are in agreement with that previously reported.<sup>5</sup>

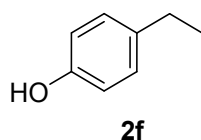

**4-Ethylphenol (2f).**  $\text{NiCl}_2 \cdot 6\text{H}_2\text{O}$  (5.9 mg, 0.025 mmol), Zinc powder (65.4 mg, 1.0 mmol), 4-vinylphenol (60.1 mg, 0.5 mmol), dioxane (2.5 mL) and  $\text{H}_2\text{O}$  (0.8 mL) were stirred at 80 °C for 7 h, the mixture was filtered through a pad of silica gel and washed with ethyl ether and ethyl acetate. Column chromatography on silica gel (eluent: petroleum ether/ethyl ether = 3:1) afforded the desired product **2f** in 86% yield (52.5 mg) as a colorless solid.  $^1\text{H}$  NMR (400 MHz,  $\text{CDCl}_3$ ):  $\delta$  7.05 (d,  $J = 8.0$  Hz, 2H), 6.75 (d,  $J = 8.4$  Hz, 2H), 5.39 (s, 1H), 2.57 (q,  $J = 8.0$  Hz, 2H), 1.19 (t,  $J = 7.6$  Hz, 3H);  $^{13}\text{C}$  NMR (100 MHz,  $\text{CDCl}_3$ ):  $\delta$  153.19, 136.56, 128.88, 115.13, 27.92, 15.83. The spectroscopic data are in agreement with that previously reported.<sup>6</sup>

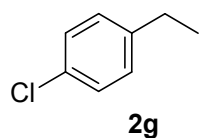

**1-Chloro-4-ethylbenzene (2g).**  $\text{NiCl}_2 \cdot 6\text{H}_2\text{O}$  (5.9 mg, 0.025 mmol), Zinc powder (65.4 mg, 1.0 mmol), dioxane (2.5 mL), 1-chloro-4-vinylbenzene (69.3 mg, 0.5 mmol) and  $\text{H}_2\text{O}$  (0.8 mL) were stirred at 80 °C for 20 h. Column chromatography on silica gel (eluent: petroleum ether) afforded the desired product **2g** in 35% yield (24.7 mg) as a colorless oil.  $^1\text{H}$  NMR (400 MHz,  $\text{CDCl}_3$ ):  $\delta$  7.24 (d,  $J = 8.4$  Hz, 2H), 7.11 (d,  $J = 8.4$  Hz, 2H), 2.61 (q,  $J = 8.0$  Hz, 2H), 1.21 (t,  $J = 7.2$  Hz, 3H);  $^{13}\text{C}$  NMR (100 MHz,  $\text{CDCl}_3$ ):  $\delta$  142.60, 131.22, 129.18, 128.34, 28.23, 15.52. The spectroscopic data are in agreement with that previously reported.<sup>7</sup>

Due to the volatile nature of this compound, the NMR yield was determined. 62% NMR yield of the desired product **2g** was obtained.

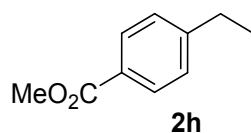

**Methyl 4-ethylbenzoate (2h).**  $\text{NiCl}_2 \cdot 6\text{H}_2\text{O}$  (5.9 mg, 0.025 mmol), Zinc powder (65.4 mg, 1.0 mmol), methyl 4-vinylbenzoate (81.1 mg, 0.5 mmol), dioxane (2.5 mL) and  $\text{H}_2\text{O}$  (0.8 mL) were stirred at 80 °C for 23.5 h, the mixture was filtered through a pad of silica gel and washed with ethyl acetate. Column chromatography on silica gel (eluent: petroleum ether/ethyl acetate = 15:1) afforded the desired product **2h** in 76% yield (62.8 mg) as a colorless oil.  $^1\text{H}$  NMR (400 MHz,  $\text{CDCl}_3$ ):  $\delta$  7.95 (d,  $J = 8.0$  Hz, 2H), 7.25 (d,  $J = 8.0$  Hz, 2H), 3.89 (s, 3H), 2.69 (q,  $J = 7.6$  Hz, 2H), 1.25 (t,  $J = 7.6$  Hz, 3H);  $^{13}\text{C}$  NMR (100 MHz,  $\text{CDCl}_3$ ):  $\delta$  167.10, 149.66, 129.63, 127.80, 127.55, 51.86, 28.86, 15.14. The spectroscopic data are in agreement with that previously reported.<sup>8</sup>

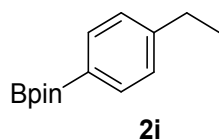

**2-(4-Ethylphenyl)-4,4,5,5-tetramethyl-1,3,2-dioxaborolane (2i).**  $\text{NiCl}_2 \cdot 6\text{H}_2\text{O}$  (5.9 mg, 0.025 mmol), Zinc powder (65.4 mg, 1.0 mmol), 4,4,5,5-tetramethyl-2-(4-vinylphenyl)-1,3,2-dioxaborolane (115.1 mg, 0.5 mmol), dioxane (2.5 mL) and  $\text{H}_2\text{O}$  (0.8 mL) were stirred at 80 °C for 11 h, the mixture was filtered through a pad of silica gel and washed with ethyl acetate.

Column chromatography on silica gel (eluent: petroleum ether/ethyl acetate = 20:1) afforded the desired product **2i** in 72% yield (83.4 mg) as a colorless solid. <sup>1</sup>H NMR (400 MHz, CDCl<sub>3</sub>): δ 7.74 (d, *J* = 8.0 Hz, 2H), 7.21 (d, *J* = 8.4 Hz, 2H), 2.65 (q, *J* = 7.6 Hz, 2H), 1.33 (s, 12H), 1.23 (t, *J* = 7.6 Hz, 3H); <sup>13</sup>C NMR (100 MHz, CDCl<sub>3</sub>): δ 147.66, 134.87, 127.30, 83.54, 29.06, 24.80, 15.44. The spectroscopic data are in agreement with that previously reported.<sup>9</sup>

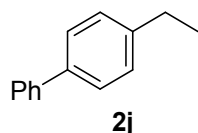

**4-Ethyl-1,1'-biphenyl (2j).** NiCl<sub>2</sub>·6H<sub>2</sub>O (5.9 mg, 0.025 mmol), Zinc powder (65.4 mg, 1.0 mmol), 4-vinyl-1,1'-biphenyl (90.1 mg, 0.5 mmol), dioxane (2.5 mL) and H<sub>2</sub>O (0.8 mL) were stirred at 80 °C for 7.5 h. Column chromatography on silica gel (eluent: petroleum ether) afforded the desired product **2j** in 94% yield (85.3 mg) as a white solid. <sup>1</sup>H NMR (400 MHz, CDCl<sub>3</sub>): δ 7.58 (d, *J* = 7.2 Hz, 2H), 7.52 (d, *J* = 8.0 Hz, 2H), 7.43 (t, *J* = 7.6 Hz, 2H), 7.34-7.27 (m, 3H), 2.70 (q, *J* = 7.6 Hz, 2H), 1.28 (t, *J* = 7.6 Hz, 3H); <sup>13</sup>C NMR (100 MHz, CDCl<sub>3</sub>): δ 143.32, 141.14, 138.57, 128.67, 128.25, 127.04, 126.96, 126.92, 28.48, 15.57. The spectroscopic data are in agreement with that previously reported.<sup>10</sup>

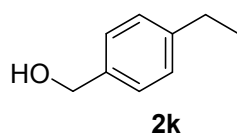

**(4-Ethylphenyl)methanol (2k).** NiCl<sub>2</sub>·6H<sub>2</sub>O (5.9 mg, 0.025 mmol), Zinc powder (65.4 mg, 1.0 mmol), dioxane (2.5 mL), (4-vinylphenyl)methanol (67.1 mg, 0.5 mmol) and H<sub>2</sub>O (0.8 mL) were stirred at 80 °C for 12 h. Column chromatography on silica gel (eluent: petroleum ether : ether acetate = 5:1) afforded the desired product **2k** in 81% yield (55.2 mg) as a colorless oil. <sup>1</sup>H NMR (400 MHz, CDCl<sub>3</sub>): δ 7.24 (d, *J* = 8.0 Hz, 2H), 7.17 (d, *J* = 7.6 Hz, 2H), 4.57 (s, 2H), 2.63 (q, *J* = 7.6 Hz, 2H), 2.27 (s, 1H), 1.22 (t, *J* = 7.6 Hz, 3H); <sup>13</sup>C NMR (100 MHz, CDCl<sub>3</sub>): δ 143.63, 138.10, 127.93, 127.10, 64.99, 28.49, 15.58. The spectroscopic data are in agreement with that previously reported.<sup>11</sup>

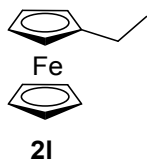

**1-Ethylferrocene (2l).**  $\text{NiCl}_2 \cdot 6\text{H}_2\text{O}$  (5.9 mg, 0.025 mmol), Zinc powder (65.4 mg, 1.0 mmol), 1-vinylferrocene (106.0 mg, 0.5 mmol), dioxane (2.5 mL) and  $\text{H}_2\text{O}$  (0.8 mL) were stirred at 80 °C for 17 h. The mixture was filtered through a pad of silica gel and washed with petroleum ether and ethyl acetate. Column chromatography on silica gel (eluent: petroleum ether) afforded the desired product **2l** in 97% yield (103.4 mg) as a yellow oil.  $^1\text{H}$  NMR (400 MHz,  $\text{CDCl}_3$ ):  $\delta$  4.09-4.03 (m, 9H), 2.33 (q,  $J = 7.6$  Hz, 2H), 1.16 (t,  $J = 7.6$  Hz, 3H);  $^{13}\text{C}$  NMR (100 MHz,  $\text{CDCl}_3$ ):  $\delta$  91.03, 68.31, 67.36, 66.88, 22.17, 14.61. The spectroscopic data are in agreement with that previously reported.<sup>12</sup>

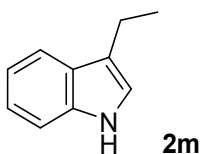

**3-Ethyl-1H-indole (2m).**  $\text{NiCl}_2 \cdot 6\text{H}_2\text{O}$  (5.9 mg, 0.025 mmol), Zinc powder (65.4 mg, 1.0 mmol), 3-vinyl-1H-indole (71.6 mg, 0.5 mmol), dioxane (2.5 mL) and  $\text{H}_2\text{O}$  (0.8 mL) were stirred at 80 °C for 8 h. The mixture was filtered through a pad of silica gel and washed with ethyl acetate. Column chromatography on silica gel (eluent: petroleum ether/ethyl acetate = 5:1) afforded the desired product **2m** in 98% yield (71.0 mg) as a colorless solid.  $^1\text{H}$  NMR (400 MHz,  $\text{CDCl}_3$ ):  $\delta$  7.60 (d,  $J = 7.6$  Hz, 2H), 7.25-7.23 (m, 1H), 7.17 (t,  $J = 7.2$  Hz, 1H), 7.12-7.08 (m, 1H), 6.84 (s, 1H), 2.76 (q,  $J = 7.6$  Hz, 2H), 1.31 (t,  $J = 7.2$  Hz, 3H);  $^{13}\text{C}$  NMR (100 MHz,  $\text{CDCl}_3$ ):  $\delta$  136.28, 127.30, 121.78, 120.44, 118.98, 118.88, 118.60, 111.02, 18.27, 14.40. The spectroscopic data are in agreement with that previously reported.<sup>13</sup>

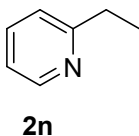

**2-Ethylpyridine (2n).**  $\text{NiCl}_2 \cdot 6\text{H}_2\text{O}$  (5.9 mg, 0.025 mmol), Zinc powder (65.4 mg, 1.0 mmol), dioxane (2.5 mL), 2-vinylpyridine (52.6 mg, 0.5 mmol) and  $\text{H}_2\text{O}$  (0.8 mL) were stirred at 80

°C for 9 h. The mixture was filtered through a pad of silica gel and washed with ethyl ether. Column chromatography on silica gel (eluent: petroleum ether to petroleum ether/ethyl ether = 3:1) afforded the desired product **2n** in 25% yield (13.3 mg) as a colorless oil. The product contains small amount of stabilizer and solvent. <sup>1</sup>H NMR (400 MHz, CDCl<sub>3</sub>): δ 8.53 (d, *J* = 4.4 Hz, 1H), 7.59 (td, *J* = 8.0, 1.6 Hz, 1H), 7.16 (d, *J* = 8.0 Hz, 1H), 7.11-7.08 (m, 1H), 2.83 (q, *J* = 7.6 Hz, 2H), 1.31 (t, *J* = 8.0 Hz, 3H); <sup>13</sup>C NMR (100 MHz, CDCl<sub>3</sub>): δ 163.47, 149.10, 136.34, 122.00, 120.85, 31.33, 13.87. The spectroscopic data are in agreement with that previously reported.<sup>14</sup>

Due to the volatile nature of this compound, the NMR yield was determined. 92% NMR yield of the desired product **2n** was obtained.

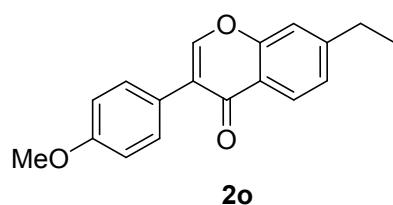

**7-Ethyl-3-(4-methoxyphenyl)-4H-chromen-4-one (2o).** NiCl<sub>2</sub>·6H<sub>2</sub>O (7.1 mg, 0.03 mmol), Zinc powder (39.2 mg, 0.6 mmol), 3-(4-methoxyphenyl)-7-vinyl-4H-chromen-4-one (83.5 mg, 0.3 mmol), dioxane (1.5 mL) and H<sub>2</sub>O (0.5 mL) were stirred at 80 °C for 20 h. the mixture was filtered through a pad of silica gel and washed with ethyl acetate. Column chromatography on silica gel (eluent: petroleum ether/ethyl acetate = 5:1) afforded the desired product **2o** in 86 % yield (72.4 mg) as a white soild. <sup>1</sup>H NMR (400 MHz, CDCl<sub>3</sub>): δ 8.20 (d, *J* = 9.6 Hz, 1H), 7.93 (s, 1H), 7.50 (d, *J* = 8.4 Hz, 2H), 7.25-7.23 (m, 2H), 6.96 (d, *J* = 8.4 Hz, 2H), 3.82 (s, 3H), 2.77 (q, *J* = 8.0 Hz, 2H), 1.29 (t, *J* = 7.6 Hz, 3H); <sup>13</sup>C NMR (100 MHz, CDCl<sub>3</sub>): δ 176.21, 159.43, 156.33, 152.21, 150.87, 129.98, 126.08, 125.44, 124.67, 124.17, 122.32, 116.33, 113.82, 55.19, 28.86, 14.88. IR (neat): 3082, 3063, 3032, 2961, 2928, 2870, 2852, 1726, 1633, 1622, 1607, 1575, 1559, 1511, 1461, 1439, 1372, 1358, 1289, 1246, 1225, 1194, 1178, 1105, 1027, 906, 885, 873, 836, 817, 803, 792, 761, 697 cm<sup>-1</sup>. HRMS (ESI) calcd for C<sub>18</sub>H<sub>17</sub>O<sub>3</sub> [M+H]<sup>+</sup>: 281.1172, found 281.1179.

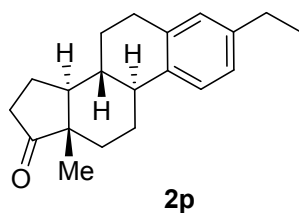

**(8*R*,9*S*,13*S*,14*S*)-3-Ethyl-13-methyl-6,7,8,9,11,12,13,14,15,16-decahydro-17*H*-cyclopenta[*a*]phenanthren-17-one (2p).** NiCl<sub>2</sub>·6H<sub>2</sub>O (7.1 mg, 0.03 mmol), Zinc powder (39.2 mg, 0.6 mmol), (8*R*,9*S*,13*S*,14*S*)-13-methyl-3-vinyl-6,7,8,9,11,12,13,14,15,16-decahydro-17*H*-cyclopenta[*a*]phenanthren-17-one (84.1 mg, 0.3 mmol), dioxane (1.5 mL) and H<sub>2</sub>O (0.5 mL) were stirred at 80 °C for 13 h. The mixture was filtered through a pad of silica gel and washed with ethyl acetate. Column chromatography on silica gel (eluent: petroleum ether/ethyl acetate = 10:1) afforded the desired product **2p** in 80% yield (68.2 mg) as a white solid. <sup>1</sup>H NMR (400 MHz, CDCl<sub>3</sub>): δ 7.21 (d, *J* = 7.6 Hz, 1H), 7.00 (d, *J* = 8.0 Hz, 1H), 6.94 (s, 1H), 2.90-2.88 (m, 2H), 2.59 (q, *J* = 7.6 Hz, 2H), 2.53-2.40 (m, 2H), 2.30-2.25 (m, 1H), 2.18-1.93 (m, 4H), 1.67-1.38 (m, 6H), 1.23 (t, *J* = 7.2 Hz, 3H), 0.89 (s, 3H); <sup>13</sup>C NMR (100 MHz, CDCl<sub>3</sub>): δ 220.80, 141.60, 136.88, 136.21, 128.40, 125.26, 125.23, 50.40, 47.91, 44.21, 38.16, 35.77, 31.53, 29.33, 28.21, 26.51, 25.66, 21.50, 15.53, 13.75. IR (neat): 2968, 2943, 2925, 2860, 1735, 1499, 1459, 1437, 1403, 1374, 1281, 1256, 1211, 1085, 1048, 1006, 910, 880, 823, 783, 711 cm<sup>-1</sup>. HRMS (ESI) calcd for C<sub>20</sub>H<sub>27</sub>O [M+H]<sup>+</sup>: 283.2056, found 283.2060.

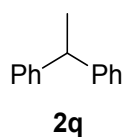

**Ethane-1,1-diyl dibenzene (2q).** NiCl<sub>2</sub>·6H<sub>2</sub>O (11.9 mg, 0.05 mmol), Zinc flake (65.4 mg, 1.0 mmol), dioxane (2.5 mL), ethene-1,1-diyl dibenzene (90.1 mg, 0.5 mmol) and H<sub>2</sub>O (0.8 mL) were stirred at 80 °C for 24 h. Column chromatography on silica gel (eluent: petroleum ether) afforded the desired product **2q** in 90% yield (81.8 mg) as a colorless oil. <sup>1</sup>H NMR (400 MHz, CDCl<sub>3</sub>): δ 7.27-7.11 (m, 10H), 4.13 (q, *J* = 7.2 Hz, 1H), 1.62 (d, *J* = 7.2 Hz, 3H); <sup>13</sup>C NMR (100 MHz, CDCl<sub>3</sub>): δ 146.30, 128.32, 127.58, 125.98, 44.70, 21.83. The spectroscopic data are in agreement with that previously reported.<sup>15</sup>

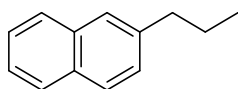

**2r**

**2-Propylnaphthalene (2r).**  $\text{NiCl}_2 \cdot 6\text{H}_2\text{O}$  (5.9 mg, 0.025 mmol), Zinc powder (65.4 mg, 1.0 mmol), dioxane (2.5 mL), 2-allylnaphthalene (84.1 mg, 0.5 mmol) and  $\text{H}_2\text{O}$  (0.8 mL) were stirred at 80 °C for 10 h. The mixture was filtered through a pad of silica gel and washed with ethyl acetate. Column chromatography on silica gel (eluent: petroleum ether) afforded the desired product **2r** in 93% yield (79.1 mg) as a colorless oil.  $^1\text{H}$  NMR (400 MHz,  $\text{CDCl}_3$ ):  $\delta$  7.79-7.73 (m, 3H), 7.59 (s, 1H), 7.44-7.37 (m, 2H), 7.31 (d,  $J = 8.4$  Hz, 1H), 2.73 (t,  $J = 7.6$  Hz, 2H), 1.77-1.67 (m, 2H), 0.96 (t,  $J = 7.2$  Hz, 3H);  $^{13}\text{C}$  NMR (100 MHz,  $\text{CDCl}_3$ ):  $\delta$  140.14, 133.61, 131.94, 127.69, 127.57, 127.43, 127.38, 126.36, 125.76, 124.96, 38.17, 24.44, 13.85. The spectroscopic data are in agreement with that previously reported.<sup>16</sup>

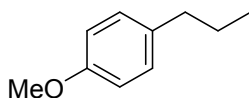

**2s**

**1-Methoxy-4-propylbenzene (2s).**  $\text{NiCl}_2 \cdot 6\text{H}_2\text{O}$  (5.9 mg, 0.025 mmol), Zinc powder (65.4 mg, 1.0 mmol), dioxane (2.5 mL), 1-allyl-4-methoxybenzene (74.1 mg, 0.5 mmol) and  $\text{H}_2\text{O}$  (0.8 mL) were stirred at 80 °C for 8 h. The mixture was filtered through a pad of silica gel and washed with ethyl acetate. Column chromatography on silica gel (eluent: petroleum ether/ethyl acetate = 50:1) afforded the desired product **2s** in 93% yield (70.2 mg) as a colorless oil.  $^1\text{H}$  NMR (400 MHz,  $\text{CDCl}_3$ ):  $\delta$  7.08 (d,  $J = 8.4$  Hz, 2H), 6.81 (d,  $J = 8.8$  Hz, 2H), 3.76 (s, 3H), 2.52 (t,  $J = 7.2$  Hz, 2H), 1.64-1.55 (m, 2H), 0.92 (t,  $J = 7.2$  Hz, 3H);  $^{13}\text{C}$  NMR (100 MHz,  $\text{CDCl}_3$ ):  $\delta$  157.55, 134.72, 129.25, 113.53, 55.12, 37.09, 24.79, 13.74. The spectroscopic data are in agreement with that previously reported.<sup>17</sup>

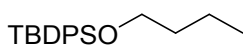

**2t**

**Butoxy(*tert*-butyl)diphenylsilane (2t).**  $\text{NiCl}_2 \cdot 6\text{H}_2\text{O}$  (11.9 mg, 0.05 mmol), Zinc powder

(65.4 mg, 1.0 mmol), dioxane (2.5 mL), (but-3-en-1-yloxy)(*tert*-butyl)diphenylsilane (155.3 mg, 0.5 mmol) and H<sub>2</sub>O (0.8 mL) were stirred at 80 °C for 20 h. The mixture was filtered through a pad of silica gel and washed with ethyl acetate. Column chromatography on silica gel (eluent: petroleum ether/ethyl acetate = 50:1) afforded the desired product **2t** in 94% yield (147.0 mg) as a colorless oil. <sup>1</sup>H NMR (400 MHz, CDCl<sub>3</sub>): δ 7.68 (d, *J* = 6.0 Hz, 4H), 7.42-7.35 (m, 6H), 3.66 (t, *J* = 6.4 Hz, 2H), 1.58-1.50 (m, 2H), 1.43-1.34 (m, 2H), 1.05 (s, 9H), 0.88 (t, *J* = 7.2 Hz, 3H); <sup>13</sup>C NMR (100 MHz, CDCl<sub>3</sub>): δ 135.57, 134.17, 129.47, 127.56, 63.69, 34.76, 26.86, 19.23, 19.01, 13.91. The spectroscopic data are in agreement with that previously reported.<sup>18</sup>

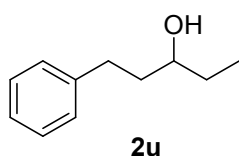

**1-Phenylpentan-3-ol (2u).** NiCl<sub>2</sub>·6H<sub>2</sub>O (11.9 mg, 0.05 mmol), Zinc powder (65.4 mg, 1.0 mmol), dioxane (2.5 mL), 5-phenylpent-1-en-3-ol (81.1 mg, 0.5 mmol) and H<sub>2</sub>O (0.8 mL) were stirred at 80 °C for 12 h. The mixture was filtered through a pad of silica gel and washed with ethyl acetate. Column chromatography on silica gel (eluent: petroleum ether/ethyl acetate = 8:1) afforded the desired product **2u** in 86% yield (71.0 mg) as a colorless oil. <sup>1</sup>H NMR (400 MHz, CDCl<sub>3</sub>): δ 7.29-7.25 (m, 2H), 7.22-7.15 (m, 3H), 3.57-3.51 (m, 1H), 2.83-2.75 (m, 1H), 2.69-2.62 (m, 1H), 1.83-1.67 (m, 3H), 1.58-1.41 (m, 2H), 0.93 (t, *J* = 7.6 Hz, 3H); <sup>13</sup>C NMR (100 MHz, CDCl<sub>3</sub>): δ 142.18, 128.34, 128.30, 125.69, 72.51, 38.49, 31.99, 30.18, 9.78. The spectroscopic data are in agreement with that previously reported.<sup>19</sup>

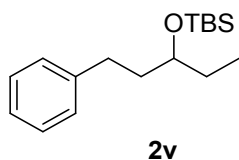

***tert*-Butyldimethyl((1-phenylpentan-3-yl)oxy)silane (2v).** NiCl<sub>2</sub>·6H<sub>2</sub>O (11.9 mg, 0.05 mmol), Zinc powder (65.4 mg, 1.0 mmol), dioxane (2.5 mL), *tert*-butyldimethyl((5-phenylpent-1-en-3-yl)oxy)silane (138.3 mg, 0.5 mmol) and H<sub>2</sub>O (0.8 mL) were stirred at 80 °C for 24 h. The mixture was filtered through a pad of silica gel and washed with ethyl acetate.

Column chromatography on silica gel (eluent: petroleum ether/ethyl acetate = 50:1) afforded the desired product **2v** in 96% yield (133.3 mg) as a colorless oil. <sup>1</sup>H NMR (400 MHz, CDCl<sub>3</sub>): δ 7.28-7.25 (m, 2H), 7.20-7.14 (m, 3H), 3.68-3.62 (m, 1H), 2.73-2.55 (m, 2H), 1.77-1.71 (m, 2H), 1.55-1.48 (m, 2H), 0.92-0.87 (m, 12H), 0.06 (s, 3H), 0.05 (s, 3H); <sup>13</sup>C NMR (100 MHz, CDCl<sub>3</sub>): δ 142.85, 128.32, 128.31, 125.60, 73.06, 38.49, 31.79, 29.69, 25.94, 18.17, 9.57, -4.36, -4.46. IR (neat): 3061, 3027, 2956, 2928, 2852, 1602, 1495, 1459, 1360, 1253, 1062, 1046, 1005, 833, 792, 772, 745, 697 cm<sup>-1</sup>. HRMS (ESI) calcd for C<sub>17</sub>H<sub>31</sub>OSi [M+H]<sup>+</sup>: 279.2139, found 279.2136.

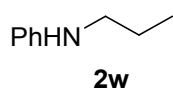

**N-Propylaniline (2w).** NiCl<sub>2</sub>·6H<sub>2</sub>O (5.9 mg, 0.025 mmol), Zinc powder (65.4 mg, 1.0 mmol), dioxane (2.5 mL), *N*-allylaniline (66.6 mg, 0.5 mmol) and H<sub>2</sub>O (0.8 mL) were stirred at 80 °C for 24 h. The mixture was filtered through a pad of silica gel and washed with ethyl acetate. Column chromatography on silica gel (eluent: petroleum ether/ethyl acetate = 20:1) afforded the desired product **2w** in 91% yield (61.3 mg) as a colorless oil. <sup>1</sup>H NMR (400 MHz, CDCl<sub>3</sub>): δ 7.16 (t, *J* = 8.4 Hz, 2H), 6.67 (t, *J* = 7.2 Hz, 1H), 6.59 (d, *J* = 8.0 Hz, 2H), 3.59 (bs, 1H), 3.06 (t, *J* = 6.8 Hz, 2H), 1.67-1.58 (m, 2H), 0.98 (t, *J* = 7.2 Hz, 3H); <sup>13</sup>C NMR (100 MHz, CDCl<sub>3</sub>): δ 148.47, 129.16, 117.01, 112.63, 45.74, 22.68, 11.59. The spectroscopic data are in agreement with that previously reported.<sup>17a</sup>

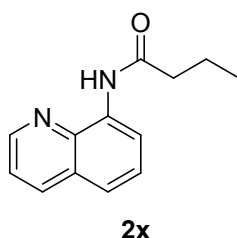

**N-(Quinolin-8-yl)butyramide (2x).** NiCl<sub>2</sub>·6H<sub>2</sub>O (5.9 mg, 0.025 mmol), Zinc powder (65.4 mg, 1.0 mmol), dioxane (2.5 mL), *N*-(quinolin-8-yl)but-3-enamide (106.1 mg, 0.5 mmol) and H<sub>2</sub>O (0.8 mL) were stirred at 80 °C for 9 h. The mixture was filtered through a pad of silica gel and washed with ethyl acetate. Column chromatography on silica gel (eluent: petroleum ether/ethyl acetate = 5:1) afforded the desired product **2x** in 92% yield (98.8 mg) as a

colorless oil.  $^1\text{H}$  NMR (400 MHz,  $\text{CDCl}_3$ ):  $\delta$  9.80 (s, 1H), 8.80-8.76 (m, 2H), 8.09 (d,  $J = 8.4$  Hz, 1H), 7.52-7.38 (m, 3H), 2.53 (t,  $J = 7.2$  Hz, 2H), 1.90-1.80 (m, 2H), 1.05 (t,  $J = 7.6$  Hz, 3H);  $^{13}\text{C}$  NMR (100 MHz,  $\text{CDCl}_3$ ):  $\delta$  171.57, 147.91, 138.08, 136.14, 134.34, 127.70, 127.18, 121.38, 121.16, 116.15, 39.94, 18.96, 13.67. The spectroscopic data are in agreement with that previously reported.<sup>20</sup>

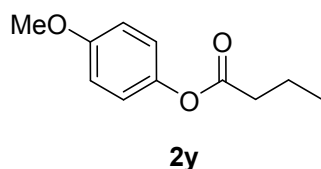

**4-Methoxyphenyl butyrate (2y).**  $\text{NiCl}_2 \cdot 6\text{H}_2\text{O}$  (5.9 mg, 0.025 mmol), Zinc powder (65.4 mg, 1.0 mmol), dioxane (2.5 mL), 4-methoxyphenyl but-3-enoate (96.1 mg, 0.5 mmol) and  $\text{H}_2\text{O}$  (0.8 mL) were stirred at 80 °C for 10.5 h. The mixture was filtered through a pad of silica gel and washed with ethyl acetate. Column chromatography on silica gel (eluent: petroleum ether/ethyl acetate = 10:1) afforded the desired product **2y** in 78% yield (76.2 mg) as a colorless oil.  $^1\text{H}$  NMR (400 MHz,  $\text{CDCl}_3$ ):  $\delta$  6.98 (d,  $J = 8.8$  Hz, 2H), 6.87 (d,  $J = 8.8$  Hz, 2H), 3.77 (s, 3H), 2.51 (q,  $J = 7.2$  Hz, 2H), 1.81-1.72 (m, 2H), 1.03 (t,  $J = 7.6$  Hz, 3H);  $^{13}\text{C}$  NMR (100 MHz,  $\text{CDCl}_3$ ):  $\delta$  172.41, 157.05, 144.12, 122.22, 114.28, 55.42, 36.03, 18.37, 13.53. The spectroscopic data are in agreement with that previously reported.<sup>21</sup>

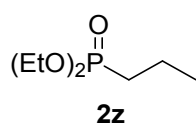

**Diethyl propylphosphonate (2z).**  $\text{NiCl}_2 \cdot 6\text{H}_2\text{O}$  (5.9 mg, 0.025 mmol), Zinc powder (65.4 mg, 1.0 mmol), dioxane (2.5 mL), diethyl allylphosphonate (89.1 mg, 0.5 mmol) and  $\text{H}_2\text{O}$  (0.8 mL) were stirred at 80 °C for 21 h. Column chromatography on silica gel (eluent: petroleum ether to ethyl ether) afforded the desired product **2z** in 80% yield (71.7 mg) as a yellow oil.  $^1\text{H}$  NMR (400 MHz,  $\text{CDCl}_3$ ):  $\delta$  4.15-4.04 (m, 4H), 1.75-1.60 (m, 4H), 1.33 (t,  $J = 7.2$  Hz, 6H), 1.04-1.00 (m, 3H);  $^{13}\text{C}$  NMR (100 MHz,  $\text{CDCl}_3$ ):  $\delta$  61.09 (d,  $J_{\text{C-P}} = 6.4$  Hz), 27.46 (d,  $J_{\text{C-P}} = 139.5$  Hz), 16.23 (d,  $J_{\text{C-P}} = 5.9$  Hz), 15.90 (d,  $J_{\text{C-P}} = 5.4$  Hz), 15.06 (d,  $J_{\text{C-P}} = 17.7$  Hz). The spectroscopic data are in agreement with that previously reported.<sup>22</sup>

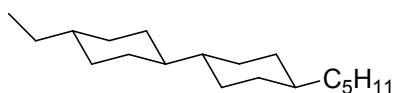

**2za**

**4-Ethyl-4'-pentyl-1,1'-bi(cyclohexane) (2za).** NiCl<sub>2</sub>·6H<sub>2</sub>O (11.9 mg, 0.05 mmol), Zinc powder (65.4 mg, 1.0 mmol), (*trans,trans*)-4-pentyl-4'-vinyl-1,1'-bi(cyclohexane) (131.2 mg, 0.5 mmol), dioxane (2.5 mL) and H<sub>2</sub>O (0.8 mL) were stirred at 80 °C for 26 h. Column chromatography on silica gel (eluent: petroleum ether) afforded the desired product **2za** in 58% yield (77.1 mg) as a white solid. <sup>1</sup>H NMR (400 MHz, CDCl<sub>3</sub>): δ 1.76-1.68 (m, 8H), 1.32-0.79 (m, 28H); <sup>13</sup>C NMR (100 MHz, CDCl<sub>3</sub>): δ 43.56, 39.77, 38.00, 37.56, 33.73, 33.29, 32.31, 30.16, 30.13, 30.10, 26.73, 22.76, 14.13, 11.54. IR (neat): 2958, 2916, 2848, 1459, 1447, 1378, 1219, 1213, 974, 894, 754, 720 cm<sup>-1</sup>. HRMS (EI) calcd for C<sub>19</sub>H<sub>36</sub> [M]<sup>+</sup>: 264.2817, found 264.2812.

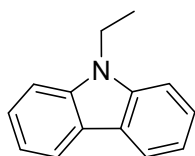

**4a**

**9-Ethyl-9H-carbazole (4a).** NiCl<sub>2</sub>·6H<sub>2</sub>O (5.9 mg, 0.025 mmol), Zinc powder (65.4 mg, 1.0 mmol), 9-vinyl-9H-carbazole (96.6 mg, 0.5 mmol), dioxane (2.5 mL) and H<sub>2</sub>O (0.8 mL) were stirred at 80 °C for 12 h. The mixture was filtered through a pad of silica gel and washed with ethyl acetate. Column chromatography on silica gel (eluent: petroleum ether/ethyl acetate = 30:1) afforded the desired product **4a** in 89% yield (86.7 mg) as a white solid. <sup>1</sup>H NMR (400 MHz, CDCl<sub>3</sub>): δ 8.08 (d, *J* = 8.0 Hz, 2H), 7.45-7.41 (m, 2H), 7.35-7.33 (m, 2H), 7.20 (t, *J* = 8.0 Hz, 2H), 4.26 (q, *J* = 7.2 Hz, 2H), 1.34 (t, *J* = 7.2 Hz, 3H); <sup>13</sup>C NMR (100 MHz, CDCl<sub>3</sub>): δ 139.82, 125.53, 122.83, 120.35, 118.67, 108.36, 37.36, 13.71. The spectroscopic data are in agreement with that previously reported.<sup>23</sup>

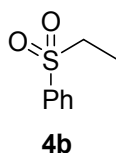

**(Ethylsulfonyl)benzene (4b).**  $\text{NiCl}_2 \cdot 6\text{H}_2\text{O}$  (5.9 mg, 0.025 mmol), Zinc powder (65.4 mg, 1.0 mmol), (vinylsulfonyl)benzene (84.1 mg, 0.5 mmol), dioxane (2.5 mL) and  $\text{H}_2\text{O}$  (0.8 mL) were stirred at 80 °C for 21 h. The mixture was filtered through a pad of silica gel and washed with ethyl ether. The residue was purified by preparative TLC on silica gel (eluent: petroleum ether/ethyl ether = 1:1) to give the desired product **4b** in 88% yield (74.6 mg) as a colorless oil.  $^1\text{H}$  NMR (400 MHz,  $\text{CDCl}_3$ ):  $\delta$  7.91 (d,  $J$  = 7.2 Hz, 2H), 7.69-7.65 (m, 1H), 7.60-7.56 (m, 2H), 3.13 (q,  $J$  = 7.2 Hz, 2H), 1.28 (t,  $J$  = 7.2 Hz, 3H);  $^{13}\text{C}$  NMR (100 MHz,  $\text{CDCl}_3$ ):  $\delta$  138.29, 133.58, 129.14, 128.03, 50.42, 7.31. The spectroscopic data are in agreement with that previously reported.<sup>24</sup>

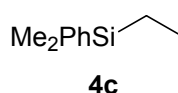

**Ethyldimethyl(phenyl)silane (4c).**  $\text{NiCl}_2 \cdot 6\text{H}_2\text{O}$  (5.9 mg, 0.025 mmol), Zinc powder (65.4 mg, 1.0 mmol), dioxane (2.5 mL), dimethyl(phenyl)(vinyl)silane (81.2 mg, 0.5 mmol) and  $\text{H}_2\text{O}$  (0.8 mL) were stirred at 80 °C for 12 h. Column chromatography on silica gel (eluent: petroleum ether) afforded the desired product **4c** in 78% yield (64.3 mg) as a colorless oil.  $^1\text{H}$  NMR (400 MHz,  $\text{CDCl}_3$ ):  $\delta$  7.52-7.49 (m, 2H), 7.34-7.33 (m, 3H), 0.95 (t,  $J$  = 8.0 Hz, 3H), 0.73 (q,  $J$  = 8.0 Hz, 2H), 0.25 (s, 6H);  $^{13}\text{C}$  NMR (100 MHz,  $\text{CDCl}_3$ ):  $\delta$  139.43, 133.58, 128.75, 127.69, 7.41, 7.40, -3.56. IR (neat): 3069, 3048, 2954, 2907, 2873, 1426, 1247, 1112, 1012, 957, 832, 815, 774, 728, 698  $\text{cm}^{-1}$ . HRMS (EI) calcd for  $\text{C}_{10}\text{H}_{16}\text{Si}$   $[\text{M}]^+$ : 164.1021, found 164.1027.

Due to the volatile nature of this compound, the NMR yield was determined. 93% NMR yield of the desired product **4c** was obtained.

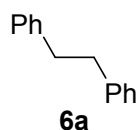

**1,2-Diphenylethane (6a).** NiCl<sub>2</sub>·6H<sub>2</sub>O (11.9 mg, 0.05 mmol), Zinc powder (65.4 mg, 1.0 mmol), *E*-stilbene (90.1 mg, 0.5 mmol), dioxane (2.5 mL) and H<sub>2</sub>O (0.8 mL) were stirred at 80 °C for 17 h. Column chromatography on silica gel (eluent: petroleum ether) afforded the desired product **6a** in 91% yield (82.8 mg) as a white solid. <sup>1</sup>H NMR (400 MHz, CDCl<sub>3</sub>): δ 7.27-7.24 (m, 4H), 7.18-7.15 (m, 6H), 2.90 (s, 4H); <sup>13</sup>C NMR (100 MHz, CDCl<sub>3</sub>): δ 141.72, 128.41, 128.29, 125.88, 37.90. The spectroscopic data are in agreement with that previously reported.<sup>25</sup>

When *Z*-stilbene was used as the substrate, the desired product **6a** was obtained in 99% yield (90.5 mg) as a white solid.

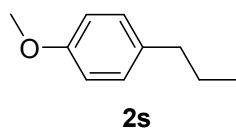

**1-Methoxy-4-propylbenzene (2s).** NiCl<sub>2</sub>·6H<sub>2</sub>O (5.9 mg, 0.025 mmol), Zinc powder (65.4 mg, 1.0 mmol), (*E*)-1-methoxy-4-(prop-1-en-1-yl)benzene (74.1 mg, 0.5 mmol), dioxane (2.5 mL) and H<sub>2</sub>O (0.8 mL) were stirred at 80 °C for 24 h. The mixture was filtered through a pad of silica gel and washed with petroleum ether and ethyl acetate. Column chromatography on silica gel (eluent: petroleum ether/ethyl ether = 50:1) afforded the desired product **2s** in 93% yield (70.1 mg) as a colorless oil. The spectroscopic data are in agreement with that obtained from **1s**.

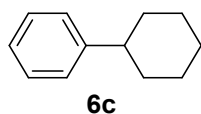

**Cyclohexylbenzene (6c).** NiCl<sub>2</sub>·6H<sub>2</sub>O (11.9 mg, 0.05 mmol), Zinc flake (98.1 mg, 1.5 mmol), dioxane (2.5 mL), 2,3,4,5-tetrahydro-1,1'-biphenyl (79.1 mg, 0.5 mmol) and H<sub>2</sub>O (0.8 mL) were stirred at 80 °C for 24 h. Column chromatography on silica gel (eluent: petroleum ether) afforded the desired product **6c** in 89% yield (71.1 mg) as a colorless oil. <sup>1</sup>H NMR (400 MHz, CDCl<sub>3</sub>): δ 7.29-7.26 (m, 2H), 7.21-7.14 (m, 3H), 2.51-2.45 (m, 1H), 1.88-1.82 (m, 4H), 1.76-1.72 (m, 1H), 1.47-1.33 (m, 4H), 1.29-1.22 (m, 1H); <sup>13</sup>C NMR (100 MHz, CDCl<sub>3</sub>): δ 148.05, 128.25, 126.80, 125.74, 44.57, 34.44, 26.90, 26.15. The spectroscopic data are in agreement

with that previously reported.<sup>26</sup>

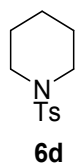

**1-Tosylpiperidine (6d).**  $\text{NiCl}_2 \cdot 6\text{H}_2\text{O}$  (11.9 mg, 0.05 mmol), Zinc powder (98.1 mg, 1.5 mmol), 1-tosyl-1,2,3,6-tetrahydropyridine (118.7 mg, 0.5 mmol), dioxane (2.5 mL) and  $\text{H}_2\text{O}$  (0.8 mL) were stirred at 80 °C for 23 h. The mixture was filtered through a pad of silica gel and washed with ethyl acetate. Column chromatography on silica gel (eluent: petroleum ether/ethyl ether = 5:1) afforded the desired product **6d** in 81% yield (96.5 mg) as a white solid.  $^1\text{H}$  NMR (400 MHz,  $\text{CDCl}_3$ ):  $\delta$  7.64 (d,  $J$  = 8.0 Hz, 2H), 7.32 (d,  $J$  = 8.0 Hz, 2H), 2.96 (t,  $J$  = 5.2 Hz, 4H), 2.43 (s, 3H), 1.66-1.60 (m, 4H), 1.43-1.38 (m, 2H);  $^{13}\text{C}$  NMR (100 MHz,  $\text{CDCl}_3$ ):  $\delta$  143.20, 132.96, 129.41, 127.54, 46.80, 25.00, 23.33, 21.37. The spectroscopic data are in agreement with that previously reported.<sup>27</sup>

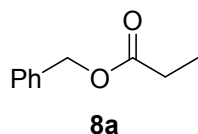

**Benzyl propionate (8a).**  $\text{NiCl}_2 \cdot 6\text{H}_2\text{O}$  (5.9 mg, 0.025 mmol), Zinc powder (65.4 mg, 1.0 mmol), dioxane (2.5 mL), benzyl acrylate (81.1 mg, 0.5 mmol) and  $\text{H}_2\text{O}$  (0.8 mL) were stirred at 80 °C for 8 h. Column chromatography on silica gel (eluent: petroleum ether/ ethyl acetate = 20:1) afforded the desired product **8a** in 91% yield (74.5mg) as a yellow oil.  $^1\text{H}$  NMR (400 MHz,  $\text{CDCl}_3$ ):  $\delta$  7.35-7.30 (m, 5H), 5.11 (s, 2H), 2.37 (q,  $J$  = 7.6 Hz, 2H), 1.15 (t,  $J$  = 7.2 Hz, 3H);  $^{13}\text{C}$  NMR (100 MHz,  $\text{CDCl}_3$ ):  $\delta$  174.15, 136.02, 128.43, 128.06, 66.00, 27.46, 8.99. The spectroscopic data are in agreement with that previously reported.<sup>28</sup>

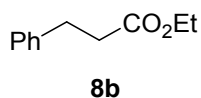

**Ethyl 3-phenylpropanoate (8b).**  $\text{NiCl}_2 \cdot 6\text{H}_2\text{O}$  (11.9 mg, 0.05 mmol), Zinc powder (65.4 mg, 1.0 mmol), dioxane (2.5 mL), ethyl cinnamate (88.1 mg, 0.5 mmol) and  $\text{H}_2\text{O}$  (0.8 mL) were

stirred at 80 °C for 12 h. The mixture was filtered through a pad of silica gel and washed with petroleum ether and ethyl acetate. Column chromatography on silica gel (eluent: petroleum ether/ ethyl acetate = 20:1) afforded the desired product **8b** in 96% yield (85.6 mg) as a colorless oil. <sup>1</sup>H NMR (400 MHz, CDCl<sub>3</sub>): δ 7.29-7.26 (m, 2H), 7.22-7.17 (m, 3H), 4.11 (q, *J* = 7.2 Hz, 2H), 2.94 (t, *J* = 8.0 Hz, 2H), 2.61 (t, *J* = 8.4 Hz, 2H), 1.22 (t, *J* = 7.2 Hz, 3H); <sup>13</sup>C NMR (100 MHz, CDCl<sub>3</sub>): δ 172.78, 140.45, 128.35, 128.19, 126.10, 60.27, 35.81, 30.84, 14.08. The spectroscopic data are in agreement with that previously reported.<sup>29</sup>

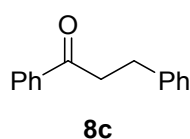

**1,3-Diphenylpropan-1-one (8c).** NiCl<sub>2</sub>·6H<sub>2</sub>O (23.8 mg, 0.1 mmol), Al powder (53.9 mg, 2.0 mmol), (*E*)-chalcone (104.1 mg, 0.5 mmol), dioxane (2.5 mL) and H<sub>2</sub>O (0.5 mL) were stirred at 80 °C for 10 h in Schlenk tube (10 mL). The mixture was filtered through a pad of silica gel and washed with petroleum ether and ethyl acetate. Column chromatography on silica gel (eluent: petroleum ether/ethyl ether = 30:1) afforded the desired product **8c** in 86% yield (89.9 mg) as a white solid. <sup>1</sup>H NMR (400 MHz, CDCl<sub>3</sub>): δ 7.96 (d, *J* = 7.6 Hz, 2H), 7.55 (t, *J* = 7.6 Hz, 1H), 7.45 (t, *J* = 7.6 Hz, 2H), 7.32-7.24 (m, 4H), 7.22-7.19 (m, 1H), 3.30 (t, *J* = 7.2 Hz, 2H), 3.07 (t, *J* = 8.0 Hz, 2H); <sup>13</sup>C NMR (100 MHz, CDCl<sub>3</sub>): δ 199.18, 141.25, 136.79, 133.03, 128.57, 128.49, 128.39, 128.00, 126.10, 40.42, 30.07. The spectroscopic data are in agreement with that previously reported.<sup>30</sup>

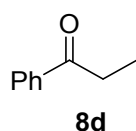

**Propiophenone (8d).** NiCl<sub>2</sub>·6H<sub>2</sub>O (23.8 mg, 0.1 mmol), Al powder (53.9 mg, 2.0 mmol), dioxane (2.5 mL), 1-phenylprop-2-en-1-one (66.1 mg, 0.5 mmol) and H<sub>2</sub>O (0.5 mL) were stirred at 80 °C for 10 h in Schlenk tube (10 mL). The mixture was filtered through a pad of silica gel and washed with petroleum ether and ethyl acetate. Column chromatography on silica gel (eluent: petroleum ether/ethyl acetate = 30:1) afforded the desired product **8d** in 72%

yield (48.0 mg) as a colorless oil.  $^1\text{H}$  NMR (400 MHz,  $\text{CDCl}_3$ ):  $\delta$  7.96 (d,  $J$  = 8.0 Hz, 2H), 7.55 (t,  $J$  = 8.0 Hz, 1H), 7.45 (t,  $J$  = 7.2 Hz, 2H), 3.00 (q,  $J$  = 7.2 Hz, 2H), 1.23 (t,  $J$  = 7.2 Hz, 3H);  $^{13}\text{C}$  NMR (100 MHz,  $\text{CDCl}_3$ ):  $\delta$  200.76, 136.82, 132.81, 128.48, 127.90, 31.71, 8.16. The spectroscopic data are in agreement with that previously reported.<sup>31</sup>

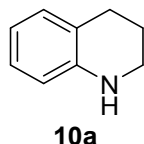

**1,2,3,4-Tetrahydroquinoline (10a).** To an oven dried sealable Schlenk tube (10 mL) were added  $\text{NiCl}_2 \cdot 6\text{H}_2\text{O}$  (7.1 mg, 0.03 mmol), Zinc powder (58.9 mg, 0.9 mmol), dioxane (1.5 mL), quinoline (38.7 mg, 0.3 mmol),  $\text{NEt}_3$  (30.4 mg, 0.3 mmol) and  $\text{H}_2\text{O}$  (0.3 mL) were added sequentially under argon. The tube was sealed with a teflon screwcap and the mixture was stirred at 100 °C for 10 h, then the mixture was filtered through a pad of silica gel and washed with ethyl acetate. **Note: the tube should be tightly sealed, which is highly important for reproducibility.** The solvent was evaporated under the reduced pressure and the residue was purified by column chromatography on silica gel (eluent: petroleum ether/ethyl acetate = 5:1) to give the desired product **10a** in 76% yield (30.4 mg) as a colorless oil.  $^1\text{H}$  NMR (400 MHz,  $\text{CDCl}_3$ ):  $\delta$  6.97-6.93 (m, 2H), 6.59 (t,  $J$  = 7.6 Hz, 1H), 6.45 (d,  $J$  = 7.6 Hz, 1H), 3.74 (br, 1H), 3.28 (t,  $J$  = 5.6 Hz, 2H), 2.75 (t,  $J$  = 6.4 Hz, 2H), 1.96-1.90 (m, 2H);  $^{13}\text{C}$  NMR (100 MHz,  $\text{CDCl}_3$ ):  $\delta$  144.71, 129.45, 126.65, 121.36, 116.85, 114.11, 41.90, 26.90, 22.10. The spectroscopic data are in agreement with that previously reported.<sup>32</sup>

When the reaction was carried out in a 25 mL sealable Schlenk tube, 55% yield of **10a** was obtained. The results indicated that the yield of the product **10a** was decreased by using a larger tube.

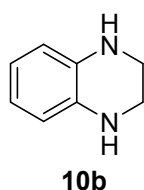

**1,2,3,4-Tetrahydroquinoxaline (10b).**  $\text{NiCl}_2 \cdot 6\text{H}_2\text{O}$  (7.1 mg, 0.03 mmol), Zinc powder (58.9 mg, 0.9 mmol), quinoxaline (39.0 mg, 0.3 mmol), dioxane (1.5 mL) and  $\text{H}_2\text{O}$  (0.5 mL) were

stirred at 100 °C for 11 h in Schlenk tube (10 mL). The mixture was filtered through a pad of silica gel and washed with ethyl acetate. Column chromatography on silica gel (eluent: petroleum ether/ethyl ether = 2:1) to give the desired product **10b** in 52% yield (20.8 mg) as a white solid. <sup>1</sup>H NMR (400 MHz, CDCl<sub>3</sub>): δ 6.59-6.57 (m, 2H), 6.50-6.49 (m, 2H), 3.65 (bs, 2H), 3.42 (s, 4H); <sup>13</sup>C NMR (100 MHz, CDCl<sub>3</sub>): δ 133.62, 118.69, 114.64, 41.31. The spectroscopic data are in agreement with that previously reported.<sup>33</sup>

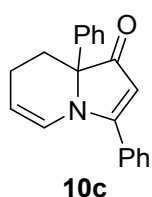

**3,8a-Diphenyl-8,8a-dihydroindolizin-1(7H)-one (10c).** To an oven dried sealable Schlenk tube (10 mL) were added NiCl<sub>2</sub>·6H<sub>2</sub>O (7.1 mg, 0.03 mmol), Zinc powder (39.2 mg, 0.6 mmol), 3,8a-diphenylindolizin-1(8aH)-one (85.6 mg, 0.3 mmol), dioxane (1.5 mL), NEt<sub>3</sub> (30.4 mg, 0.3 mmol) and H<sub>2</sub>O (0.3 mL) were added sequentially under argon. The tube was sealed with a teflon screwcap and the mixture was stirred at 100 °C for 10 h, the mixture was filtered through a pad of silica gel and washed with ethyl acetate. **Note: the tube should be tightly sealed, which is highly important for reproducibility.** The solvent was evaporated under the reduced pressure and the residue was purified by column chromatography on silica gel (eluent: petroleum ether/ethyl acetate = 5:1) to give the desired product **10c** in 65% yield (55.9 mg) as a yellow solid. <sup>1</sup>H NMR (400 MHz, CDCl<sub>3</sub>): δ 7.60-7.54 (m, 7H), 7.38 (t, *J* = 7.2 Hz, 2H), 7.32-7.28 (m, 1H), 6.73 (d, *J* = 7.6 Hz, 1H), 5.36 (s, 1H), 4.96 (t, *J* = 6.0 Hz, 1H), 2.69-2.65 (m, 1H), 2.04-1.73 (m, 3H); <sup>13</sup>C NMR (100 MHz, CDCl<sub>3</sub>): δ 200.86, 172.66, 136.79, 130.96, 129.81, 128.96, 128.60, 128.03, 127.56, 125.29, 123.71, 109.50, 101.60, 71.02, 31.16, 19.71. IR (neat): 3095, 3066, 3003, 2966, 2917, 2848, 1668, 1637, 1581, 1537, 1487, 1449, 1407, 1384, 1298, 1210, 1143, 1124, 1071, 1029, 1017, 994, 883, 828, 809, 775, 767, 734, 696, 669, 656 cm<sup>-1</sup>. HRMS (ESI) calcd for C<sub>20</sub>H<sub>18</sub>NO [M+H]<sup>+</sup>: 288.1383, found 288.1386.

### Ni-Catalyzed transfer hydrogenation of alkynes.

#### Typical procedure for the synthesis of 2d from alkyne 11a.

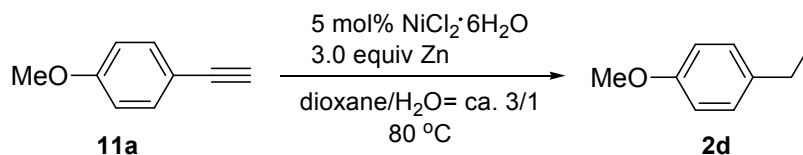

To an oven dried Schlenk tube (25 mL) were added  $\text{NiCl}_2\cdot 6\text{H}_2\text{O}$  (5.9 mg, 0.025 mmol), Zinc powder (98.1 mg, 1.5 mmol). The Schlenk tube was capped with a rubber septum, evacuated and back filled with argon for three times. Then dioxane (2.5 mL), 1-ethynyl-4-methoxybenzene (66.1 mg, 0.5 mmol) and  $\text{H}_2\text{O}$  (0.8 mL) were added sequentially under argon. The tube cap was then securely fitted and sealed with electrical tape, and the stopcock valve on the sidearm of the Schlenk tube was closed. After the mixture was stirred at 80 °C for 16.5 h, it was filtered through a pad of silica gel and washed with petroleum ether and ethyl ether. **Note: a stirring speed above 600 rpm is highly important for reproducibility.** The solvent was evaporated under the reduced pressure and the residue was purified by column chromatography on silica gel (eluent: petroleum ether to petroleum ether/ethyl ether = 50:1) to give the desired product **2d** in 71% yield (48.1 mg) as a colorless oil. The spectroscopic data are in agreement with that obtained from **1d**.

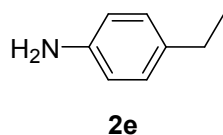

**4-Ethylaniline (2e).**  $\text{NiCl}_2\cdot 6\text{H}_2\text{O}$  (5.9 mg, 0.025 mmol), Zinc powder (98.1 mg, 1.5 mmol), 4-ethynylaniline (58.6 mg, 0.5 mmol), dioxane (2.5 mL) and  $\text{H}_2\text{O}$  (0.8 mL) were stirred at 80 °C for 22 h. The mixture was filtered through a pad of silica gel and washed with ethyl ether. Column chromatography on silica gel (eluent: petroleum ether/ethyl ether = 1:1) afforded the desired product **2e** in 93% yield (56.4 mg) as a yellow oil. The spectroscopic data are in agreement with that obtained from **1e**.

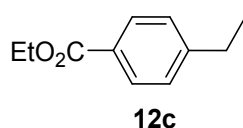

**Ethyl 4-ethylbenzoate (12c).**  $\text{NiCl}_2\cdot 6\text{H}_2\text{O}$  (5.9 mg, 0.025 mmol), Zinc powder (98.1 mg, 1.5

mmol), ethyl 4-ethynylbenzoate (87.1 mg, 0.5 mmol), dioxane (2.5 mL) and H<sub>2</sub>O (0.8 mL) were stirred at 80 °C for 24 h. The mixture was filtered through a pad of silica gel and washed with petroleum ether and ethyl acetate. Column chromatography on silica gel (eluent: petroleum ether/ethyl acetate = 20:1) afforded the desired product **12c** in 90% yield (80.5 mg) as a colorless oil. <sup>1</sup>H NMR (400 MHz, CDCl<sub>3</sub>): δ 7.96 (d, *J* = 8.4 Hz, 2H), 7.24 (d, *J* = 8.0 Hz, 2H), 4.36 (q, *J* = 6.8 Hz, 2H), 2.69 (q, *J* = 7.6 Hz, 2H), 1.38 (t, *J* = 7.2 Hz, 3H), 1.24 (t, *J* = 7.6 Hz, 3H); <sup>13</sup>C NMR (100 MHz, CDCl<sub>3</sub>): δ 166.58, 149.50, 129.57, 127.90, 127.73, 60.62, 28.84, 15.15, 14.25. The spectroscopic data are in agreement with that previously reported.<sup>34</sup>

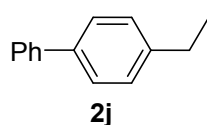

**4-Ethyl-1,1'-biphenyl (2j).** NiCl<sub>2</sub>·6H<sub>2</sub>O (11.9 mg, 0.05 mmol), Zinc powder (98.1 mg, 1.5 mmol), 4-ethynyl-1,1'-biphenyl (89.1 mg, 0.5 mmol), dioxane (2.5 mL) and H<sub>2</sub>O (0.8 mL) were stirred at 80 °C for 24 h. The mixture was filtered through a pad of silica gel and washed with petroleum ether and ethyl acetate. Column chromatography on silica gel (eluent: petroleum ether) afforded the desired product **2j** in 89% yield (80.7 mg) as a white solid. The spectroscopic data are in agreement with that obtained from **1j**.

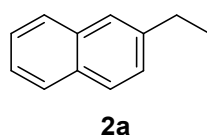

**2-Ethynynaphthalene (2a).** NiCl<sub>2</sub>·6H<sub>2</sub>O (5.9 mg, 0.025 mmol), Zinc powder (98.1 mg, 1.5 mmol), 2-ethynynaphthalene (76.1 mg, 0.5 mmol), dioxane (2.5 mL) and H<sub>2</sub>O (0.8 mL) were stirred at 80 °C for 10 h. The mixture was filtered through a pad of silica gel and washed with petroleum ether. Column chromatography on silica gel (eluent: petroleum ether) afforded the desired product **2a** in 91% yield (71.3 mg) as a colorless oil. The spectroscopic data are in agreement with that obtained from **1a**.

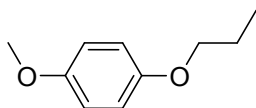

**12f**

**1-Methoxy-4-propoxybenzene (12f).**  $\text{NiCl}_2 \cdot 6\text{H}_2\text{O}$  (5.9 mg, 0.025 mmol), Zinc powder (98.1 mg, 1.5 mmol), dioxane (2.5 mL), 1-methoxy-4-(prop-2-yn-1-yloxy)benzene (81.1 mg, 0.5 mmol) and  $\text{H}_2\text{O}$  (0.8 mL) were stirred at 80 °C for 22.5 h, the mixture was filtered through a pad of silica gel and washed with ethyl acetate. Column chromatography on silica gel (eluent: petroleum ether/ethyl acetate = 10:1) afforded the desired product **12f** in 68% yield (56.1 mg) as a colorless oil.  $^1\text{H}$  NMR (400 MHz,  $\text{CDCl}_3$ ):  $\delta$  6.82 (s, 4H), 3.85 (t,  $J$  = 6.8 Hz, 2H), 3.75 (s, 3H), 1.82-1.73 (m, 2H), 1.02 (t,  $J$  = 7.6 Hz, 3H);  $^{13}\text{C}$  NMR (100 MHz,  $\text{CDCl}_3$ ):  $\delta$  153.57, 153.21, 115.32, 114.51, 70.05, 55.62, 22.63, 10.48. The spectroscopic data are in agreement with that previously reported.<sup>35</sup>

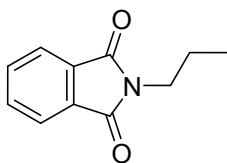

**12g**

**2-Propylisoindoline-1,3-dione (12g).**  $\text{NiCl}_2 \cdot 6\text{H}_2\text{O}$  (11.9 mg, 0.05 mmol), Zinc powder (98.1 mg, 1.5 mmol), 2-(prop-2-yn-1-yl)isoindoline-1,3-dione (92.6 mg, 0.5 mmol), dioxane (2.5 mL) and  $\text{H}_2\text{O}$  (0.8 mL) were stirred at 80 °C for 23 h. The mixture was filtered through a pad of silica gel and washed with ethyl acetate. Column chromatography on silica gel (eluent: petroleum ether/ethyl acetate = 10:1) afforded the desired product **12g** in 86% yield (81.2 mg) as a white solid.  $^1\text{H}$  NMR (400 MHz,  $\text{CDCl}_3$ ):  $\delta$  7.85-7.83 (m, 2H), 7.73-7.71 (m, 2H), 3.66 (t,  $J$  = 7.2 Hz, 2H), 1.76-1.67 (m, 2H), 0.96 (t,  $J$  = 7.6 Hz, 3H);  $^{13}\text{C}$  NMR (100 MHz,  $\text{CDCl}_3$ ):  $\delta$  168.30, 133.69, 131.99, 122.98, 39.43, 21.77, 11.19. The spectroscopic data are in agreement with that previously reported.<sup>36</sup>

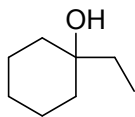

**12h**

**1-Ethylcyclohexan-1-ol (12h).**  $\text{NiCl}_2 \cdot 6\text{H}_2\text{O}$  (11.9 mg, 0.05 mmol), Zinc powder (98.1 mg, 1.5 mmol), dioxane (2.5 mL), 1-ethynylcyclohexan-1-ol (62.0 mg, 0.5 mmol) and  $\text{H}_2\text{O}$  (0.8 mL) were stirred at 80 °C for 24 h, the mixture was filtered through a pad of silica gel and washed with petroleum ether and ethyl acetate. Column chromatography on silica gel (eluent: petroleum ether /ethyl acetate = 50:1) afforded the desired product **12h** in 67% yield (43.2 mg) as a colorless oil.  $^1\text{H}$  NMR (400 MHz,  $\text{CDCl}_3$ ):  $\delta$  1.63-1.37 (m, 11H), 1.31-1.24 (m, 2H), 0.90 (t,  $J$  = 7.6 Hz, 3H);  $^{13}\text{C}$  NMR (100 MHz,  $\text{CDCl}_3$ ):  $\delta$  71.38, 36.81, 34.63, 25.82, 22.16, 7.17. The spectroscopic data are in agreement with that previously reported.<sup>37</sup>

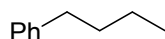

**12i**

**Butylbenzene (12i).**  $\text{NiCl}_2 \cdot 6\text{H}_2\text{O}$  (11.9 mg, 0.05 mmol), Zinc powder (98.1 mg, 1.5 mmol), dioxane (2.5 mL), but-3-yn-1-ylbenzene (65.1 mg, 0.5 mmol) and  $\text{H}_2\text{O}$  (0.8 mL) were stirred at 80 °C for 24 h, the mixture was filtered through a pad of silica gel and washed with petroleum ether. Column chromatography on silica gel (eluent: petroleum ether) afforded the desired product **12i** in 47% yield (31.7 mg) as a colorless oil.  $^1\text{H}$  NMR (400 MHz,  $\text{CDCl}_3$ ):  $\delta$  7.27 (t,  $J$  = 7.2 Hz, 2H), 7.20-7.14 (m, 3H), 2.60 (t,  $J$  = 7.6 Hz, 2H), 1.63-1.56 (m, 2H), 1.40-1.31 (m, 2H), 0.92 (t,  $J$  = 7.6 Hz, 3H);  $^{13}\text{C}$  NMR (100 MHz,  $\text{CDCl}_3$ ):  $\delta$  142.88, 128.39, 128.19, 125.52, 35.66, 33.68, 22.37, 13.96. The spectroscopic data are in agreement with that previously reported.<sup>38</sup>

Due to the volatile nature of this compound, the NMR yield was determined. 87% NMR yield of the desired product **12i** was obtained.

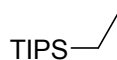

**12j**

**Ethyltriisopropylsilane (12j).**  $\text{NiCl}_2 \cdot 6\text{H}_2\text{O}$  (11.9 mg, 0.05 mmol), Zinc powder (98.1 mg, 1.5

mmol), dioxane (2.5 mL), ethynyltriisopropylsilane (91.2 mg, 0.5 mmol) and H<sub>2</sub>O (0.8 mL) were stirred at 80 °C for 22 h, the mixture was filtered through a pad of silica gel and washed with pentane. Column chromatography on silica gel (eluent: pentane) afforded the desired product **12j** in 64% yield (59.9 mg) as a white solid. <sup>1</sup>H NMR (400 MHz, CDCl<sub>3</sub>): δ 1.04-0.97 (m, 24H), 0.60 (q, *J* = 8.0 Hz, 2H); <sup>13</sup>C NMR (100 MHz, CDCl<sub>3</sub>): δ 18.84, 10.79, 8.21, 0.85. The spectroscopic data are in agreement with that previously reported.<sup>39</sup>

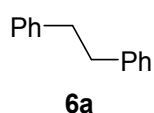

**1,2-Diphenylethane (6a).** NiCl<sub>2</sub>·6H<sub>2</sub>O (11.9 mg, 0.05 mmol), Zinc flake (98.1 mg, 1.5 mmol), 1,2-diphenylethyne (89.1 mg, 0.5 mmol), dioxane (2.5 mL) and H<sub>2</sub>O (0.8 mL) were stirred at 80 °C for 24 h. The mixture was filtered through a pad of silica gel and washed with petroleum ether. Column chromatography on silica gel (eluent: petroleum ether) afforded the desired product **6a** in 94% yield (85.4 mg) as a white solid. The spectroscopic data are in agreement with that obtained from **5a**.

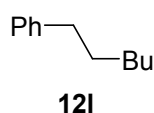

**Hexylbenzene (12l).** NiCl<sub>2</sub>·6H<sub>2</sub>O (11.9 mg, 0.05 mmol), Zinc powder (98.1 mg, 1.5 mmol), dioxane (2.5 mL), hex-1-yn-1-ylbenzene (79.1 mg, 0.5 mmol), and H<sub>2</sub>O (0.8 mL) were stirred at 80 °C for 24 h. The mixture was filtered through a pad of silica gel and washed with petroleum ether. Column chromatography on silica gel (eluent: petroleum ether) afforded the desired product **12l** in 93% yield (75.3 mg) as a colorless oil. <sup>1</sup>H NMR (400 MHz, CDCl<sub>3</sub>): δ 7.28-7.24 (m, 2H), 7.18-7.14 (m, 3H), 2.59 (t, *J* = 7.6 Hz, 2H), 1.64-1.57 (m, 2H), 1.36-1.30 (m, 6H), 0.88 (t, *J* = 6.0 Hz, 3H); <sup>13</sup>C NMR (100 MHz, CDCl<sub>3</sub>): δ 142.92, 128.38, 128.19, 125.52, 36.00, 31.75, 31.52, 29.03, 22.63, 14.11. The spectroscopic data are in agreement with that previously reported.<sup>10</sup>

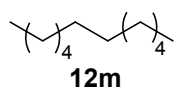

**Dodecane (12m).** NiCl<sub>2</sub>·6H<sub>2</sub>O (11.9 mg, 0.05 mmol), Zinc flake (98.1 mg, 1.5 mmol), dioxane (2.5 mL), dodec-6-yne (83.2 mg, 0.5 mmol), and H<sub>2</sub>O (0.8 mL) were stirred at 80 °C for 24 h. Column chromatography on silica gel (eluent: petroleum ether) afforded the desired product **12m** in 75% yield (63.6 mg) as a colorless oil. <sup>1</sup>H NMR (400 MHz, CDCl<sub>3</sub>): δ 1.26 (s, 20H), 0.90-0.86 (m, 6H); <sup>13</sup>C NMR (100 MHz, CDCl<sub>3</sub>): δ 31.99, 29.77, 29.72, 29.43, 22.74, 14.13. The spectroscopic data are in agreement with that previously reported.<sup>41</sup>

## Control experiments.

### (1) Deuterium labeling experiments.

#### NiCl<sub>2</sub>-catalyzed deuterium labeling experiment of 11k with D<sub>2</sub>O.

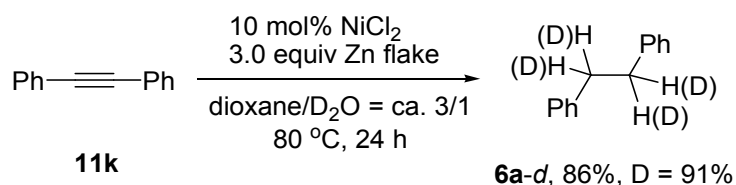

To an oven dried Schlenk tube were added NiCl<sub>2</sub> (6.5 mg, 0.05 mmol), Zinc flake (98.1 mg, 1.5 mmol), 1,2-diphenylethyne (89.1 mg, 0.5 mmol). The tube was evacuated and back filled with argon for three times, then dioxane (2.5 mL) and D<sub>2</sub>O (0.8 mL) were added sequentially under argon. The tube was sealed and the mixture was stirred at 80 °C for 24 h, the mixture was filtered through a pad of silica gel and washed with petroleum ether. The solvent was evaporated under the reduced pressure and the residue was purified by column chromatography on silica gel (eluent: petroleum ether) to give the desired product **6a-d** in 86% yield (80.0 mg) as a white solid. <sup>1</sup>H NMR (400 MHz, CDCl<sub>3</sub>): δ 7.28-7.24 (m, 4H), 7.19-7.15 (m, 6H), 2.87 (s, 0.36H). <sup>13</sup>C NMR (100 MHz, CDCl<sub>3</sub>): δ 141.64, 128.40, 128.29, 125.87, 37.77-36.63 (m). HRMS (EI) calcd for C<sub>14</sub>H<sub>10</sub>D<sub>4</sub> [M]<sup>+</sup>: 186.1347, found 186.1351.

### (2) KIE experiment.

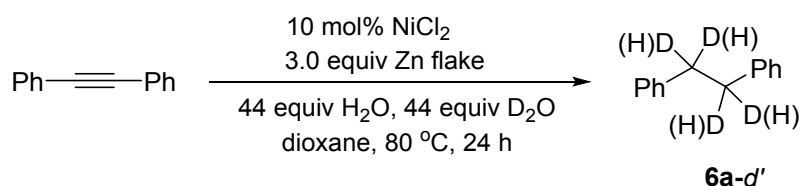

To an oven dried Schlenk tube were added NiCl<sub>2</sub> (6.5 mg, 0.05 mmol), Zinc flake (98.1

mg, 1.5 mmol), 1,2-diphenylethyne (89.1 mg, 0.5 mmol). The tube was evacuated and back filled with argon for three times, then dioxane (2.5 mL), H<sub>2</sub>O (396 mg, 22 mmol, 44 equiv) and D<sub>2</sub>O (440 mg, 22 mmol, 44 equiv) were added sequentially under argon. The tube was sealed and the mixture was stirred at 80 °C for 24 h, the mixture was filtered through a pad of silica gel and washed with petroleum ether. The solvent was evaporated under the reduced pressure and the residue was purified by column chromatography on silica gel (eluent: petroleum ether) to give the desired product **6a-d'** in 90% yield (82.4 mg) as a colorless oil.

(目标产物 FW:183.5) <sup>1</sup>H NMR (400 MHz, CDCl<sub>3</sub>): δ 7.27-7.24 (m, 4H), 7.18-7.15 (m, 6H), 2.90-2.87 (m, 2.77H); <sup>13</sup>C NMR (100 MHz, CDCl<sub>3</sub>): δ 141.71, 141.68, 128.40, 128.28, 125.87, 37.90, 37.83, 37.76, 37.53 (t, *J*<sub>C-D</sub> = 19.5 Hz), 37.46 (t, *J*<sub>C-D</sub> = 19.5 Hz). HRMS (EI) calcd for C<sub>14</sub>H<sub>10</sub>D<sub>4</sub> [M]<sup>+</sup>: 186.1347, found 186.1345.

### Kinetic isotopic effect with individual reaction.

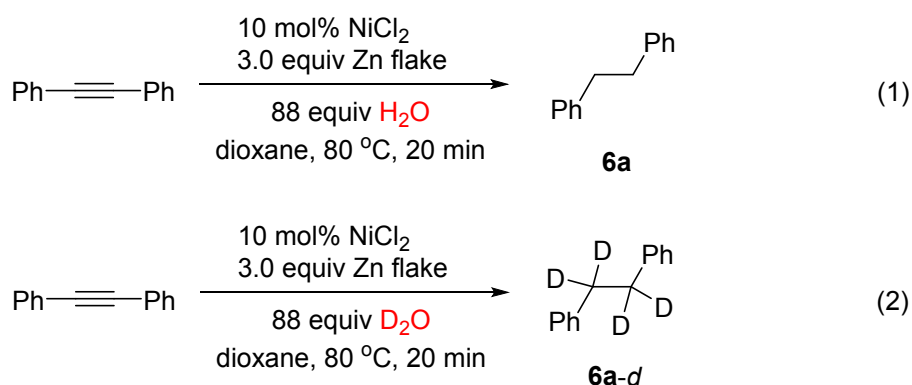

Following the general procedure: (1) The reduction of diphenylacetylene with H<sub>2</sub>O: NiCl<sub>2</sub> (6.5 mg, 0.05 mmol), Zinc flake (98.1 mg, 1.5 mmol), 1,2-diphenylethyne (89.1 mg, 0.5 mmol), dioxane (2.5 mL) and H<sub>2</sub>O (792 mg, 44 mmol, 88 equiv) were stirred at 80 °C for 20 min. (2) The reduction of diphenylacetylene with D<sub>2</sub>O: NiCl<sub>2</sub> (6.5 mg, 0.05 mmol), Zinc flake (98.1 mg, 1.5 mmol), 1,2-diphenylethyne (89.1 mg, 0.5 mmol), dioxane (2.5 mL) and D<sub>2</sub>O (881 mg, 44 mmol, 88 equiv) were stirred at 80 °C for 20 min. After quenching the reactions, the mixture of the two reactions was combined and purified by preparative TLC on silica gel (eluent: hexane) to give a mixture of **6a** and **6a-d**, along with a byproduct of *E*-stilbene. The ratio of **6a** and **6a-d** was determined by <sup>1</sup>H NMR, and the KIE of *k*<sub>H</sub>/*k*<sub>D</sub> was found to be 3.0.

### (3) Deuterium labeling experiment.

### NiCl<sub>2</sub>-catalyzed deuterium labeling experiment of **1a** with D<sub>2</sub>O.

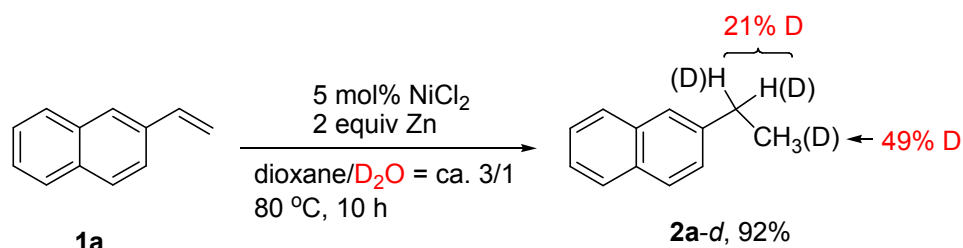

To an oven dried Schlenk tube were added NiCl<sub>2</sub> (3.2 mg, 0.05 mmol), Zinc powder (65.4 mg, 1.0 mmol), 2-vinylnaphthalene (77.1 mg, 0.5 mmol). The tube was evacuated and back filled with argon for three times, then dioxane (2.5 mL) and D<sub>2</sub>O (0.8 mL) were added sequentially under argon. The tube was sealed and the mixture was stirred at 80 °C for 10 h, the mixture was filtered through a pad of silica gel and washed with petroleum ether. The solvent was evaporated under the reduced pressure and the residue was purified by column chromatography on silica gel (eluent: petroleum ether) to give the desired product **2a-d** in 92% yield (73.1 mg) as a colorless oil. <sup>1</sup>H NMR (400 MHz, CDCl<sub>3</sub>): δ 7.77-7.71 (m, 3H), 7.58 (s, 1H), 7.43-7.35 (m, 2H), 7.30 (d, *J* = 8.4 Hz, 1H), 2.80-2.75 (m, 1.59H), 1.34-1.26 (m, 1.54H); <sup>13</sup>C NMR (100 MHz, CDCl<sub>3</sub>): δ 141.70, 133.66, 131.90, 127.76, 127.57, 127.38, 127.04, 125.79, 125.50, 124.96, 29.01, 28.84 (t, *J*<sub>C-D</sub> = 8.3 Hz), 15.52, 15.44, 15.22 (t, *J*<sub>C-D</sub> = 19.4 Hz). HRMS (EI) calcd for C<sub>12</sub>H<sub>10</sub>D<sub>2</sub> [M]<sup>+</sup>: 158.1065, found 158.1060.

### (4) Mercury poisoning experiment.

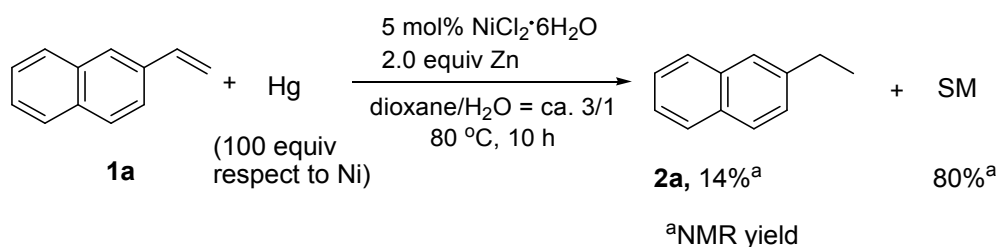

To an oven dried Schlenk tube were added NiCl<sub>2</sub>·6H<sub>2</sub>O (5.9 mg, 0.025 mmol), Zn (65.4 mg, 1.0 mmol), **1a** (77.1 mg, 0.5 mmol). The tube was evacuated and back filled with argon for three times, then dioxane (2.5 mL), H<sub>2</sub>O (0.8 mL) and Hg (501.5 mg, 2.5 mmol, 100 equiv respect to Ni) were added sequentially under argon. The tube was sealed and the mixture was stirred at 80 °C for 10 h, the mixture was filtered through a pad of silica gel and washed with petroleum ether. The solvent was evaporated under the reduced pressure and the residue was

dissolved in  $\text{CDCl}_3$ . The NMR yields were obtained by  $^1\text{H}$  NMR analysis of the crude mixture using 1, 3, 5-methoxybenzene (84.1 mg, 0.5 mmol) as an internal standard. 14% NMR yield of the desired product **2a** and 80% NMR yield of the **1a** was observed.

**(5) Gas-chromatographic analysis of  $\text{H}_2$  gas:**

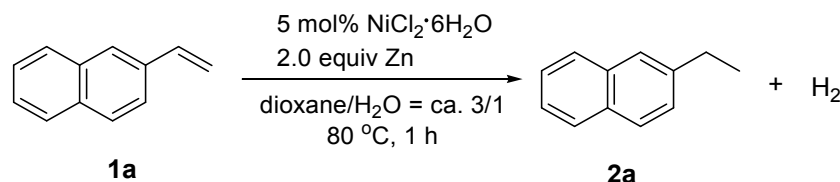

The reaction was conducted in an oven-dried screw-cap vial (12 mL) equipped with a magnetic stir bar. In a nitrogen-filled glove box,  $\text{NiCl}_2\cdot 6\text{H}_2\text{O}$  (5.9 mg, 0.025 mmol), Zinc powder (65.4 mg, 1.0 mmol), 2-vinylnaphthalene (77.1 mg, 0.5 mmol), dioxane (2.5 mL) were added sequentially to a screw-cap vial. The vial cap was then securely fitted and taken outside the glove box, then  $\text{H}_2\text{O}$  (0.8 mL) was added to the vial. After the reaction mixture was stirred at 80  $^\circ\text{C}$  for 1 h. The gas in the vial is analyzed by the gas chromatography equipped with TCD detector using  $\text{N}_2$  as the carrier gas, and  $\text{H}_2$  was detected.  $\text{H}_2$  was also detected in the absence of **1a**. See **Figure S1**.

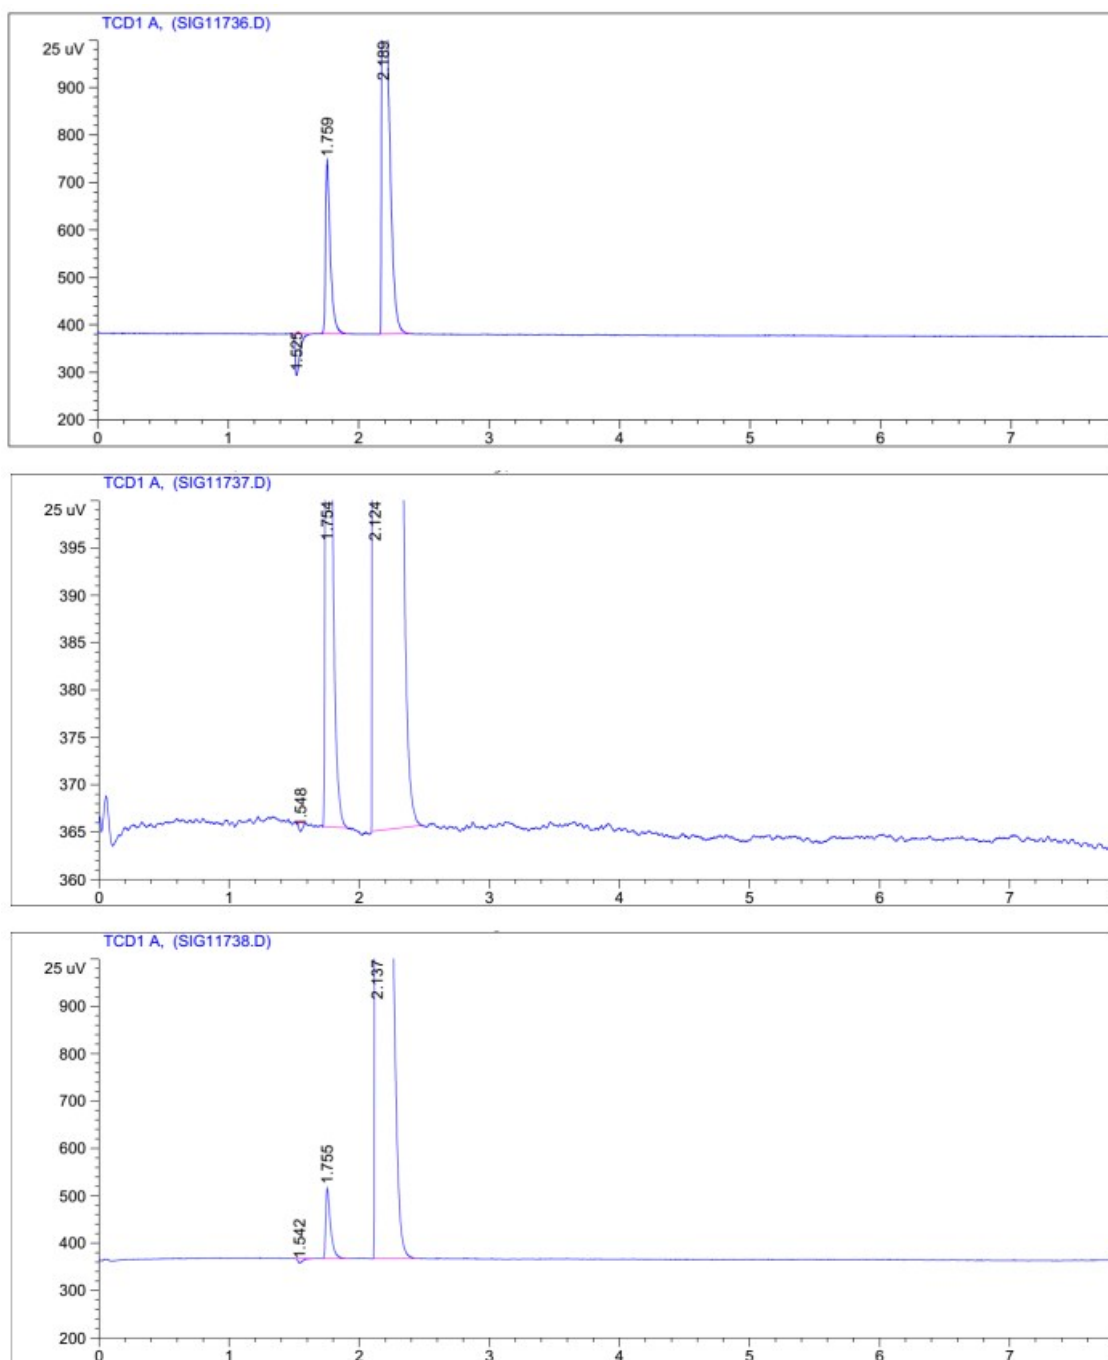

**Figure S1.** The gas chromatography of the H<sub>2</sub> standard (above). The gas chromatography of the gas in the reaction vial containing alkyne **1a** (middle). The gas chromatography of the gas under the reaction conditions without addition of alkyne **1a** (below). The results indicated that H<sub>2</sub> was formed during the reaction. The retention time of H<sub>2</sub> is around 1.5 min, O<sub>2</sub> is around 1.7 min, and N<sub>2</sub> is around 2.1 min.

### 1 mmol scale reaction

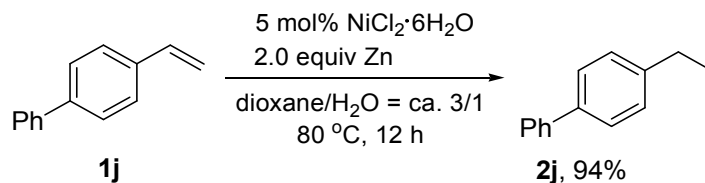

To an oven dried Schlenk tube were added  $\text{NiCl}_2\cdot 6\text{H}_2\text{O}$  (11.9 mg, 0.05 mmol), Zn (130.8 mg, 2 mmol), and **1j** (180.3 mg, 1 mmol) under air. The Schlenk tube was capped with a rubber septum, evacuated and back filled with argon for three times. Then dioxane (5 mL) and  $\text{H}_2\text{O}$  (1.6 mL) were added sequentially under argon. The tube cap was then securely fitted and sealed with electrical tape, and the stopcock valve on the sidearm of the Schlenk tube was closed. After the mixture was stirred at 80 °C for 12 h, it was filtered through a pad of silica gel and washed with petroleum ether. The solvent was evaporated under the reduced pressure and the residue was purified by column chromatography on silica gel (eluent: petroleum ether) to give the desired product **2j** in 94% yield (171.7 mg) as a white solid.

## References:

- (1) Hongfa, C.; Su, H. L.; Bazzi, H. S.; Bergbreiter, D. E. *Org. Lett.* **2009**, *11*, 665.
- (2) Liu, X.; Hsiao, C.-C.; Kalvet, I.; Leiendecker, M.; Guo, L.; Schoenebeck, F.; Rueping, M. *Angew. Chem. Int. Ed.* **2016**, *55*, 6093.
- (3) Sakai, N.; Nagasawa, K.; Ikeda, R.; Nakaike, Y.; Konakahara, T. *Tetrahedron Lett.* **2011**, *52*, 3133.
- (4) Leow, D.; Chen, Y.-H.; Hung, T.-H.; Su, Y.; Lin, Y.-Z. *Eur. J. Org. Chem.* **2014**, *2014*, 7347.
- (5) Takasaki, M.; Motoyama, Y.; Higashi, K.; Yoon, S.-H.; Mochida, I.; Nagashima, H. *Org. Lett.* **2008**, *10*, 1601.
- (6) Bora, S. J.; Chetia, B. *J. Organomet. Chem.* **2017**, *851*, 52.
- (7) Cummings, S. P.; Le, T. N.; Fernandez, G. E.; Quiambao, L. G.; Stokes, B. J. *J. Am. Chem. Soc.* **2016**, *138*, 6107.
- (8) Jiang, Q.; Zhao, A.; Xu, B.; Jia, J.; Liu, X.; Guo, C. *J. Org. Chem.* **2014**, *79*, 2709.
- (9) Browne, D. L.; Baumann, M.; Harji, B. H.; Baxendale, I. R.; Ley, S. V. *Org. Lett.* **2011**, *13*, 3312.

- (10) Luan, Y.-X.; Zhang, T.; Yao, W.-W.; Lu, K.; Kong, L.-Y.; Lin, Y.-T.; Ye, M. *J. Am. Chem. Soc.* **2017**, *139*, 1786.
- (11) Kotha, S. S.; Sharma, N.; Sekar, G. *Adv. Synth. Catal.* **2016**, *358*, 1694.
- (12) Maazaoui, R.; Pin-Nó, M.; Gervais, K.; Abderrahim, R.; Ferreira, F.; Perez-Luna, A.; Chemla, F.; Jackowski, O. *Eur. J. Org. Chem.* **2016**, 5732. (b) Teimuri-Mofrad, R.; Safa, K. D.; Rahimpour, K. *J. Organomet. Chem.* **2014**, *758*, 36.
- (13) Cheng, H.-G.; Lu, L.-Q.; Wang, T.; Yang, Q.-Q.; Liu, X.-P.; Li, Y.; Deng, Q.-H.; Chen, J.-R.; Xiao, W.-J. *Angew. Chem. Int. Ed.* **2013**, *52*, 3250.
- (14) Patil, N. M.; Sasaki, T.; Bhanage, B. M. *RSC. Adv.* **2016**, *6*, 52347.
- (15) Chatterjee, I.; Oestreich, M. *Org. Lett.* **2016**, *18*, 2463.
- (16) Saito, K.; Kondo, K.; Akiyama, T. *Org. Lett.* **2015**, *17*, 3366.
- (17) (a) Wang, Y.; Huang, Z.; Leng, X.; Zhu, H.; Liu, G.; Huang, Z. *J. Am. Chem. Soc.* **2018**, *140*, 4417. (b) Lundevall, F. J.; Elumalai, V.; Drageset, A.; Totland, C.; Bjørsvik, H.-R. *Eur. J. Org. Chem.* **2018**, 2018, 3416.
- (18) Yang, W.; Gao, L.; Lu, J.; Song, Z. *Chem. Commun.* **2018**, *54*, 4834.
- (19) (a) Werner, T.; Bauer, M.; Riahi, A. M.; Schramm, H. *Eur. J. Org. Chem.* **2014**, 4876. (b) Bastug, G.; Dierick, S.; Lebreux, F.; Markó, I. E. *Org. Lett.* **2012**, *14*, 1306.
- (20) Gou, Q.; Zhang, Z.-F.; Liu, Z.-C.; Qin, J. *J. Org. Chem.* **2015**, *80*, 3176.
- (21) Nguyen, T. V.; Lyons, D. J. M. *Chem. Commun.* **2015**, *51*, 3131.
- (22) Baldwin, I. C.; Beckett, R. P.; Williams, J. M. J. *Synthesis.* **1996**, 34.
- (23) Dhara, K.; Mandal, T.; Das, J.; Dash, J. *Angew. Chem. Int. Ed.* **2015**, *54*, 15831.
- (24) Doherty, S.; Knight, J. G.; Carroll, M. A.; Ellison, J. R.; Hobson, S. J.; Stevens, S.; Hardacre, C.; Goodrich, P. *Green Chem.* **2015**, *17*, 1559.
- (25) Yuan, Y.; Bian, Y. *Appl. Organomet. Chem.* **2008**, *22*, 15.
- (26) Nguyen, J. D.; Reiß, B.; Dai, C.; Stephenson, C. R. J. *Chem. Commun.* **2013**, *49*, 4352. (b) Zeng, H.; Cao, D.; Qiu, Z.; Li, C.-J. *Angew. Chem. Int. Ed.* **2018**, *57*, 3752.
- (27) (a) Shavnya, A.; Hesp, K. D.; Mascitti, V.; Smith, A. C. *Angew. Chem. Int. Ed.* **2015**, *54*, 13571.
- (28) Lu, L.; Cheng, D.; Zhan, Y.; Shi, R.; Chiang, C.-W.; Lei, A. *Chem. Commun.* **2017**, *53*, 6852.

- (29) Lamani, M.; Guralamata, R. S.; Prabhu, K. R. *Chem. Commun.* **2012**, 48, 6583.
- (30) Fox, D. J.; Pedersen, D. S.; Warren, S. *Org. Biomol. Chem.* **2006**, 4, 3102.
- (31) Wu, J.-C.; Gong, L.-B.; Xia, Y.; Song, R.-J.; Xie, Y.-X.; Li, J.-H. *Angew. Chem. Int. Ed.* **2012**, 51, 9909.
- (32) Murphy, L.; Brulatti, P.; Fattori, V.; Cocchi, M.; Williams, J. A. G. *Chem. Commun.* **2012**, 48, 5817.
- (33) Yang, C.-H.; Chen, X.; Li, H.; Wei, W.; Yang, Z.; Chang, J. *Chem. Commun.* **2018**, 54, 8622.
- (34) Gagnon, A.; Duplessis, M.; Alsabeh, P.; Barabé, F. *J. Org. Chem.* **2008**, 73, 3604.
- (35) Guo, Y.; Fan, X.-M.; Nie, M.; Liu, H.-W.; Liao, D.-H.; Pan, X.-D.; Ji, Y.-F. *Eur. J. Org. Chem.* **2015**, 2015, 4744.
- (36) Konishi, H.; Nagase, H.; Manabe, K. *Chem. Commun.* **2015**, 51, 1854.
- (37) (a) Kapoor, M.; Liu, D.; Young, M. C. *J. Am. Chem. Soc.* **2018**, 140, 6818. (b) St John-Campbell, S. S.; Ou, A. K.; Bull, J. A. *Chem. Eur. J.* **2018**, 24, 17838.
- (38) Alonso, F.; Riente, P.; Yus, M. *Tetrahedron.* **2009**, 65, 10637.
- (39) LaPointe, A. M.; Rix, F. C.; Brookhart, M. *J. Am. Chem. Soc.* **1997**, 119, 906.
- (40) Andersen, T. L.; Donslund, A. S.; Neumann, K. T.; Skrydstrup, T. *Angew. Chem. Int. Ed.* **2018**, 57, 800.
- (41) Iwasaki, T.; Yamashita, K.; Kuniyasu, H.; Kambe, N. *Org. Lett.* **2017**, 19, 3691.

#### X-ray crystallographic structure and data for compound 10c.

The ellipsoid contour is 30%.

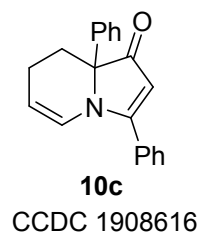

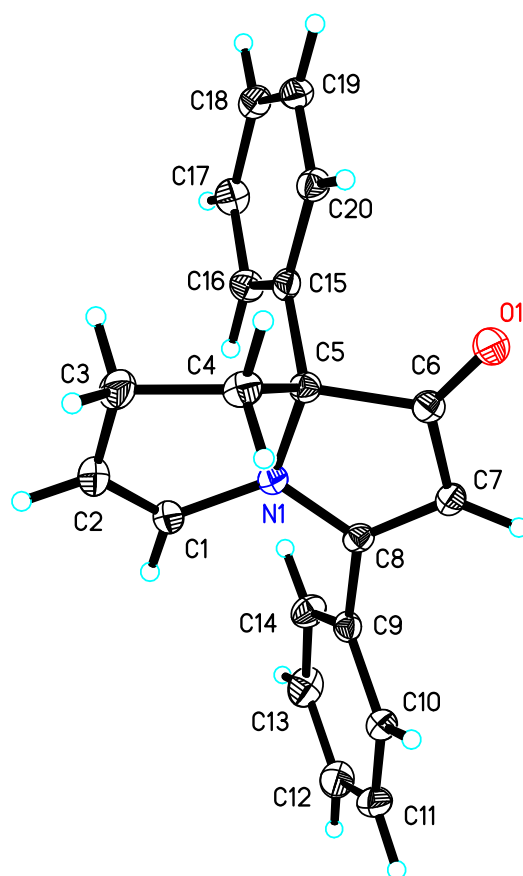

**Figure S2.** X-ray crystal structure of compound **10c**

Table S2. Crystal data and structure refinement for d8v19160.

|                      |                                     |          |
|----------------------|-------------------------------------|----------|
| Identification code  | d8v19160                            |          |
| Empirical formula    | C <sub>20</sub> H <sub>17</sub> N O |          |
| Formula weight       | 287.35                              |          |
| Temperature          | 194(2) K                            |          |
| Wavelength           | 0.71073 Å                           |          |
| Crystal system       | Orthorhombic                        |          |
| Space group          | P b c a                             |          |
| Unit cell dimensions | a = 14.5964(5) Å                    | α = 90°. |
|                      | b = 13.9382(5) Å                    | β = 90°. |

|                                 |                                                                    |                       |
|---------------------------------|--------------------------------------------------------------------|-----------------------|
|                                 | $c = 14.6669(5) \text{ \AA}$                                       | $\gamma = 90^\circ$ . |
| Volume                          | 2983.94(18) $\text{\AA}^3$                                         |                       |
| Z                               | 8                                                                  |                       |
| Density (calculated)            | 1.279 $\text{Mg/m}^3$                                              |                       |
| Absorption coefficient          | 0.078 $\text{mm}^{-1}$                                             |                       |
| F(000)                          | 1216                                                               |                       |
| Crystal size                    | 0.180 x 0.160 x 0.130 $\text{mm}^3$                                |                       |
| Theta range for data collection | 2.452 to 25.993°.                                                  |                       |
| Index ranges                    | $-18 \leq h \leq 15$ , $-17 \leq k \leq 15$ , $-18 \leq l \leq 17$ |                       |
| Reflections collected           | 28649                                                              |                       |
| Independent reflections         | 2907 [R(int) = 0.0400]                                             |                       |
| Completeness to theta = 25.242° | 99.4 %                                                             |                       |
| Absorption correction           | Semi-empirical from equivalents                                    |                       |
| Max. and min. transmission      | 0.7456 and 0.6536                                                  |                       |
| Refinement method               | Full-matrix least-squares on $F^2$                                 |                       |
| Data / restraints / parameters  | 2907 / 0 / 200                                                     |                       |
| Goodness-of-fit on $F^2$        | 1.034                                                              |                       |
| Final R indices [I > 2sigma(I)] | R1 = 0.0359, wR2 = 0.0880                                          |                       |
| R indices (all data)            | R1 = 0.0422, wR2 = 0.0931                                          |                       |
| Extinction coefficient          | 0.018(2)                                                           |                       |
| Largest diff. peak and hole     | 0.254 and -0.156 $\text{e.\AA}^{-3}$                               |                       |

Table S3. Atomic coordinates ( $\times 10^4$ ) and equivalent isotropic displacement parameters ( $\text{\AA}^2 \times 10^3$ ) for d8v19160.  $U(\text{eq})$  is defined as one third of the trace of the orthogonalized  $U^{\text{ij}}$  tensor.

|       | x       | y       | z       | $U(\text{eq})$ |
|-------|---------|---------|---------|----------------|
| O(1)  | 4758(1) | 7970(1) | 3759(1) | 36(1)          |
| N(1)  | 5932(1) | 6078(1) | 2663(1) | 27(1)          |
| C(1)  | 5919(1) | 5385(1) | 1967(1) | 32(1)          |
| C(2)  | 5421(1) | 5499(1) | 1217(1) | 40(1)          |
| C(3)  | 4781(1) | 6326(1) | 1086(1) | 40(1)          |
| C(4)  | 4542(1) | 6773(1) | 2009(1) | 33(1)          |
| C(5)  | 5420(1) | 6976(1) | 2549(1) | 26(1)          |
| C(6)  | 5216(1) | 7267(1) | 3549(1) | 27(1)          |
| C(7)  | 5671(1) | 6576(1) | 4113(1) | 28(1)          |
| C(8)  | 6062(1) | 5893(1) | 3572(1) | 25(1)          |
| C(9)  | 6593(1) | 5049(1) | 3876(1) | 26(1)          |
| C(10) | 6200(1) | 4377(1) | 4456(1) | 29(1)          |
| C(11) | 6708(1) | 3607(1) | 4768(1) | 37(1)          |
| C(12) | 7618(1) | 3514(1) | 4518(1) | 42(1)          |
| C(13) | 8016(1) | 4178(1) | 3945(1) | 42(1)          |
| C(14) | 7503(1) | 4938(1) | 3614(1) | 35(1)          |
| C(15) | 6012(1) | 7744(1) | 2094(1) | 26(1)          |
| C(16) | 6916(1) | 7584(1) | 1839(1) | 32(1)          |
| C(17) | 7425(1) | 8301(1) | 1422(1) | 35(1)          |
| C(18) | 7037(1) | 9187(1) | 1252(1) | 33(1)          |
| C(19) | 6142(1) | 9360(1) | 1518(1) | 32(1)          |
| C(20) | 5633(1) | 8648(1) | 1937(1) | 30(1)          |

Table S4. Bond lengths [ $\text{\AA}$ ] and angles [ $^\circ$ ] for d8v19160.

---

|             |            |
|-------------|------------|
| O(1)-C(6)   | 1.2258(14) |
| N(1)-C(8)   | 1.3708(15) |
| N(1)-C(1)   | 1.4067(15) |
| N(1)-C(5)   | 1.4674(14) |
| C(1)-C(2)   | 1.3276(18) |
| C(1)-H(1)   | 0.9500     |
| C(2)-C(3)   | 1.496(2)   |
| C(2)-H(2)   | 0.9500     |
| C(3)-C(4)   | 1.5302(18) |
| C(3)-H(3A)  | 0.9900     |
| C(3)-H(3B)  | 0.9900     |
| C(4)-C(5)   | 1.5337(16) |
| C(4)-H(4A)  | 0.9900     |
| C(4)-H(4B)  | 0.9900     |
| C(5)-C(15)  | 1.5289(15) |
| C(5)-C(6)   | 1.5513(16) |
| C(6)-C(7)   | 1.4325(16) |
| C(7)-C(8)   | 1.3634(16) |
| C(7)-H(7)   | 0.9500     |
| C(8)-C(9)   | 1.4782(16) |
| C(9)-C(10)  | 1.3888(16) |
| C(9)-C(14)  | 1.3920(17) |
| C(10)-C(11) | 1.3824(17) |
| C(10)-H(10) | 0.9500     |
| C(11)-C(12) | 1.383(2)   |
| C(11)-H(11) | 0.9500     |
| C(12)-C(13) | 1.380(2)   |
| C(12)-H(12) | 0.9500     |

|             |            |
|-------------|------------|
| C(13)-C(14) | 1.3839(18) |
| C(13)-H(13) | 0.9500     |
| C(14)-H(14) | 0.9500     |
| C(15)-C(16) | 1.3897(17) |
| C(15)-C(20) | 1.3944(16) |
| C(16)-C(17) | 1.3880(17) |
| C(16)-H(16) | 0.9500     |
| C(17)-C(18) | 1.3820(18) |
| C(17)-H(17) | 0.9500     |
| C(18)-C(19) | 1.3854(19) |
| C(18)-H(18) | 0.9500     |
| C(19)-C(20) | 1.3833(17) |
| C(19)-H(19) | 0.9500     |
| C(20)-H(20) | 0.9500     |

|                  |            |
|------------------|------------|
| C(8)-N(1)-C(1)   | 125.40(10) |
| C(8)-N(1)-C(5)   | 109.96(9)  |
| C(1)-N(1)-C(5)   | 119.73(9)  |
| C(2)-C(1)-N(1)   | 121.79(12) |
| C(2)-C(1)-H(1)   | 119.1      |
| N(1)-C(1)-H(1)   | 119.1      |
| C(1)-C(2)-C(3)   | 122.72(12) |
| C(1)-C(2)-H(2)   | 118.6      |
| C(3)-C(2)-H(2)   | 118.6      |
| C(2)-C(3)-C(4)   | 110.05(10) |
| C(2)-C(3)-H(3A)  | 109.7      |
| C(4)-C(3)-H(3A)  | 109.7      |
| C(2)-C(3)-H(3B)  | 109.7      |
| C(4)-C(3)-H(3B)  | 109.7      |
| H(3A)-C(3)-H(3B) | 108.2      |

|                   |            |
|-------------------|------------|
| C(3)-C(4)-C(5)    | 109.94(10) |
| C(3)-C(4)-H(4A)   | 109.7      |
| C(5)-C(4)-H(4A)   | 109.7      |
| C(3)-C(4)-H(4B)   | 109.7      |
| C(5)-C(4)-H(4B)   | 109.7      |
| H(4A)-C(4)-H(4B)  | 108.2      |
| N(1)-C(5)-C(15)   | 111.06(9)  |
| N(1)-C(5)-C(4)    | 109.14(9)  |
| C(15)-C(5)-C(4)   | 112.09(9)  |
| N(1)-C(5)-C(6)    | 102.29(9)  |
| C(15)-C(5)-C(6)   | 109.76(9)  |
| C(4)-C(5)-C(6)    | 112.10(10) |
| O(1)-C(6)-C(7)    | 130.23(11) |
| O(1)-C(6)-C(5)    | 123.46(10) |
| C(7)-C(6)-C(5)    | 106.30(9)  |
| C(8)-C(7)-C(6)    | 109.13(10) |
| C(8)-C(7)-H(7)    | 125.4      |
| C(6)-C(7)-H(7)    | 125.4      |
| C(7)-C(8)-N(1)    | 112.14(10) |
| C(7)-C(8)-C(9)    | 126.86(10) |
| N(1)-C(8)-C(9)    | 120.98(10) |
| C(10)-C(9)-C(14)  | 119.22(11) |
| C(10)-C(9)-C(8)   | 120.32(10) |
| C(14)-C(9)-C(8)   | 120.41(10) |
| C(11)-C(10)-C(9)  | 120.29(11) |
| C(11)-C(10)-H(10) | 119.9      |
| C(9)-C(10)-H(10)  | 119.9      |
| C(10)-C(11)-C(12) | 120.05(12) |
| C(10)-C(11)-H(11) | 120.0      |
| C(12)-C(11)-H(11) | 120.0      |

|                   |            |
|-------------------|------------|
| C(13)-C(12)-C(11) | 120.15(12) |
| C(13)-C(12)-H(12) | 119.9      |
| C(11)-C(12)-H(12) | 119.9      |
| C(12)-C(13)-C(14) | 119.95(12) |
| C(12)-C(13)-H(13) | 120.0      |
| C(14)-C(13)-H(13) | 120.0      |
| C(13)-C(14)-C(9)  | 120.31(12) |
| C(13)-C(14)-H(14) | 119.8      |
| C(9)-C(14)-H(14)  | 119.8      |
| C(16)-C(15)-C(20) | 118.49(11) |
| C(16)-C(15)-C(5)  | 122.75(10) |
| C(20)-C(15)-C(5)  | 118.76(10) |
| C(17)-C(16)-C(15) | 120.77(11) |
| C(17)-C(16)-H(16) | 119.6      |
| C(15)-C(16)-H(16) | 119.6      |
| C(18)-C(17)-C(16) | 120.26(11) |
| C(18)-C(17)-H(17) | 119.9      |
| C(16)-C(17)-H(17) | 119.9      |
| C(17)-C(18)-C(19) | 119.39(11) |
| C(17)-C(18)-H(18) | 120.3      |
| C(19)-C(18)-H(18) | 120.3      |
| C(20)-C(19)-C(18) | 120.48(11) |
| C(20)-C(19)-H(19) | 119.8      |
| C(18)-C(19)-H(19) | 119.8      |
| C(19)-C(20)-C(15) | 120.59(11) |
| C(19)-C(20)-H(20) | 119.7      |
| C(15)-C(20)-H(20) | 119.7      |

---

Symmetry transformations used to generate equivalent atoms:



Table S5. Anisotropic displacement parameters ( $\text{\AA}^2 \times 10^3$ ) for d8v19160. The anisotropic displacement factor exponent takes the form:  $-2\pi^2 [h^2 a^{*2} U^{11} + \dots + 2 h k a^* b^* U^{12}]$

|       | $U^{11}$ | $U^{22}$ | $U^{33}$ | $U^{23}$ | $U^{13}$ | $U^{12}$ |
|-------|----------|----------|----------|----------|----------|----------|
| O(1)  | 36(1)    | 34(1)    | 37(1)    | 0(1)     | 7(1)     | 9(1)     |
| N(1)  | 31(1)    | 25(1)    | 24(1)    | 1(1)     | 0(1)     | 2(1)     |
| C(1)  | 41(1)    | 28(1)    | 28(1)    | -2(1)    | 4(1)     | 0(1)     |
| C(2)  | 53(1)    | 39(1)    | 28(1)    | -5(1)    | -2(1)    | -4(1)    |
| C(3)  | 45(1)    | 44(1)    | 30(1)    | 2(1)     | -10(1)   | -8(1)    |
| C(4)  | 29(1)    | 36(1)    | 35(1)    | 5(1)     | -5(1)    | -3(1)    |
| C(5)  | 27(1)    | 26(1)    | 26(1)    | 2(1)     | 0(1)     | 2(1)     |
| C(6)  | 23(1)    | 28(1)    | 29(1)    | 0(1)     | 4(1)     | -2(1)    |
| C(7)  | 29(1)    | 31(1)    | 24(1)    | 1(1)     | 1(1)     | -1(1)    |
| C(8)  | 22(1)    | 27(1)    | 25(1)    | 3(1)     | 0(1)     | -4(1)    |
| C(9)  | 27(1)    | 27(1)    | 23(1)    | -2(1)    | -2(1)    | 0(1)     |
| C(10) | 30(1)    | 30(1)    | 28(1)    | 1(1)     | 1(1)     | -1(1)    |
| C(11) | 47(1)    | 30(1)    | 35(1)    | 6(1)     | 3(1)     | 3(1)     |
| C(12) | 50(1)    | 39(1)    | 37(1)    | 3(1)     | -1(1)    | 19(1)    |
| C(13) | 33(1)    | 54(1)    | 40(1)    | 2(1)     | 4(1)     | 14(1)    |
| C(14) | 31(1)    | 40(1)    | 35(1)    | 6(1)     | 6(1)     | 2(1)     |
| C(15) | 28(1)    | 29(1)    | 21(1)    | -1(1)    | -2(1)    | -1(1)    |
| C(16) | 29(1)    | 30(1)    | 35(1)    | 0(1)     | 1(1)     | 3(1)     |
| C(17) | 28(1)    | 39(1)    | 38(1)    | -2(1)    | 3(1)     | -2(1)    |
| C(18) | 35(1)    | 35(1)    | 28(1)    | 2(1)     | -2(1)    | -9(1)    |
| C(19) | 39(1)    | 28(1)    | 30(1)    | 3(1)     | -5(1)    | 1(1)     |
| C(20) | 29(1)    | 32(1)    | 28(1)    | 2(1)     | -1(1)    | 4(1)     |

Table S6. Hydrogen coordinates ( $\times 10^4$ ) and isotropic displacement parameters ( $\text{\AA}^2 \times 10^{-3}$ ) for d8v19160.

|       | x    | y    | z    | U(eq) |
|-------|------|------|------|-------|
| H(1)  | 6277 | 4820 | 2034 | 39    |
| H(2)  | 5473 | 5036 | 745  | 48    |
| H(3A) | 4215 | 6102 | 782  | 48    |
| H(3B) | 5073 | 6814 | 691  | 48    |
| H(4A) | 4145 | 6329 | 2358 | 40    |
| H(4B) | 4200 | 7378 | 1913 | 40    |
| H(7)  | 5696 | 6590 | 4760 | 33    |
| H(10) | 5579 | 4446 | 4639 | 35    |
| H(11) | 6433 | 3142 | 5154 | 45    |
| H(12) | 7969 | 2991 | 4743 | 50    |
| H(13) | 8642 | 4115 | 3777 | 50    |
| H(14) | 7774 | 5385 | 3206 | 42    |
| H(16) | 7188 | 6976 | 1951 | 38    |
| H(17) | 8043 | 8182 | 1254 | 42    |
| H(18) | 7381 | 9674 | 954  | 40    |
| H(19) | 5875 | 9972 | 1413 | 38    |
| H(20) | 5020 | 8775 | 2119 | 35    |

Table S7. Torsion angles [°] for d8v19160.

---

|                      |             |
|----------------------|-------------|
| C(8)-N(1)-C(1)-C(2)  | 149.63(13)  |
| C(5)-N(1)-C(1)-C(2)  | -3.01(17)   |
| N(1)-C(1)-C(2)-C(3)  | -5.0(2)     |
| C(1)-C(2)-C(3)-C(4)  | -19.83(18)  |
| C(2)-C(3)-C(4)-C(5)  | 50.40(14)   |
| C(8)-N(1)-C(5)-C(15) | 113.91(10)  |
| C(1)-N(1)-C(5)-C(15) | -89.57(12)  |
| C(8)-N(1)-C(5)-C(4)  | -122.03(10) |
| C(1)-N(1)-C(5)-C(4)  | 34.49(14)   |
| C(8)-N(1)-C(5)-C(6)  | -3.14(12)   |
| C(1)-N(1)-C(5)-C(6)  | 153.38(10)  |
| C(3)-C(4)-C(5)-N(1)  | -57.70(13)  |
| C(3)-C(4)-C(5)-C(15) | 65.75(13)   |
| C(3)-C(4)-C(5)-C(6)  | -170.29(10) |
| N(1)-C(5)-C(6)-O(1)  | -176.88(10) |
| C(15)-C(5)-C(6)-O(1) | 65.14(14)   |
| C(4)-C(5)-C(6)-O(1)  | -60.10(14)  |
| N(1)-C(5)-C(6)-C(7)  | 4.09(11)    |
| C(15)-C(5)-C(6)-C(7) | -113.89(10) |
| C(4)-C(5)-C(6)-C(7)  | 120.87(10)  |
| O(1)-C(6)-C(7)-C(8)  | 177.32(12)  |
| C(5)-C(6)-C(7)-C(8)  | -3.74(12)   |
| C(6)-C(7)-C(8)-N(1)  | 1.84(13)    |
| C(6)-C(7)-C(8)-C(9)  | -179.73(10) |
| C(1)-N(1)-C(8)-C(7)  | -153.85(11) |
| C(5)-N(1)-C(8)-C(7)  | 1.02(13)    |
| C(1)-N(1)-C(8)-C(9)  | 27.62(17)   |
| C(5)-N(1)-C(8)-C(9)  | -177.51(9)  |

|                         |             |
|-------------------------|-------------|
| C(7)-C(8)-C(9)-C(10)    | 58.47(16)   |
| N(1)-C(8)-C(9)-C(10)    | -123.23(12) |
| C(7)-C(8)-C(9)-C(14)    | -118.95(14) |
| N(1)-C(8)-C(9)-C(14)    | 59.35(15)   |
| C(14)-C(9)-C(10)-C(11)  | -0.04(18)   |
| C(8)-C(9)-C(10)-C(11)   | -177.48(11) |
| C(9)-C(10)-C(11)-C(12)  | 1.36(19)    |
| C(10)-C(11)-C(12)-C(13) | -1.2(2)     |
| C(11)-C(12)-C(13)-C(14) | -0.3(2)     |
| C(12)-C(13)-C(14)-C(9)  | 1.7(2)      |
| C(10)-C(9)-C(14)-C(13)  | -1.48(19)   |
| C(8)-C(9)-C(14)-C(13)   | 175.96(12)  |
| N(1)-C(5)-C(15)-C(16)   | -0.36(15)   |
| C(4)-C(5)-C(15)-C(16)   | -122.72(12) |
| C(6)-C(5)-C(15)-C(16)   | 112.03(12)  |
| N(1)-C(5)-C(15)-C(20)   | -179.69(10) |
| C(4)-C(5)-C(15)-C(20)   | 57.95(14)   |
| C(6)-C(5)-C(15)-C(20)   | -67.31(13)  |
| C(20)-C(15)-C(16)-C(17) | -1.09(17)   |
| C(5)-C(15)-C(16)-C(17)  | 179.58(11)  |
| C(15)-C(16)-C(17)-C(18) | -0.29(19)   |
| C(16)-C(17)-C(18)-C(19) | 1.40(18)    |
| C(17)-C(18)-C(19)-C(20) | -1.14(18)   |
| C(18)-C(19)-C(20)-C(15) | -0.25(18)   |
| C(16)-C(15)-C(20)-C(19) | 1.35(17)    |
| C(5)-C(15)-C(20)-C(19)  | -179.29(10) |

---

Symmetry transformations used to generate equivalent atoms:

Table S8. Hydrogen bonds for d8v19160 [Å and °].

| D-H...A | d(D-H) | d(H...A) | d(D...A) | <(DHA) |
|---------|--------|----------|----------|--------|
|---------|--------|----------|----------|--------|

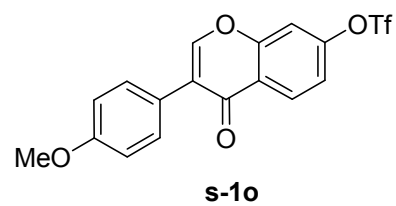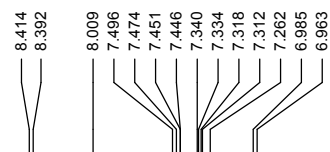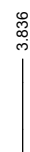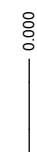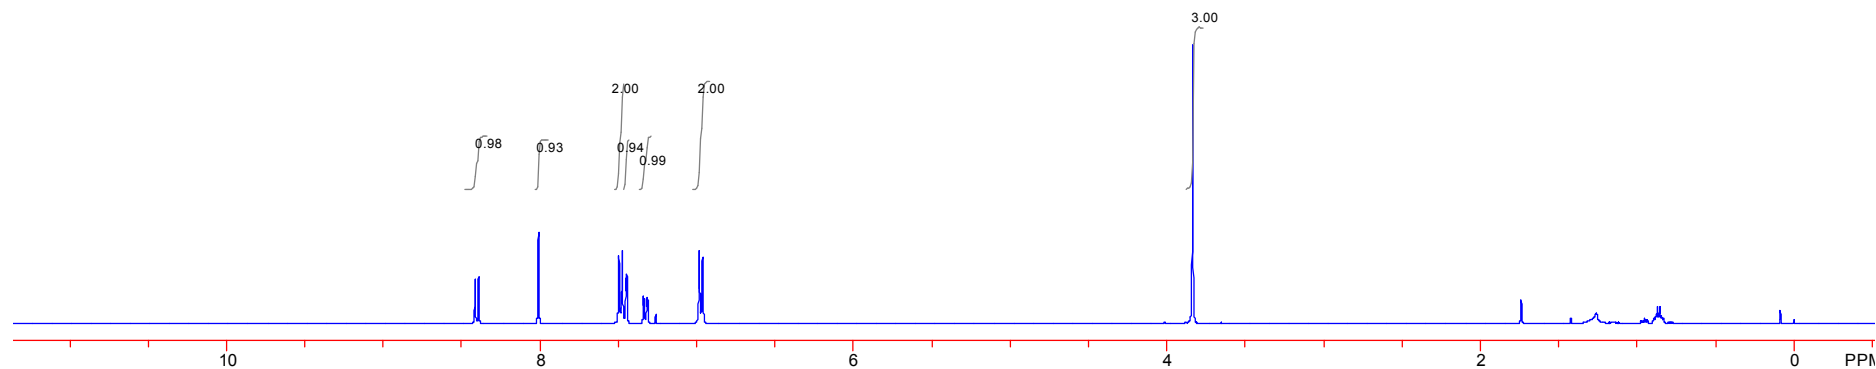

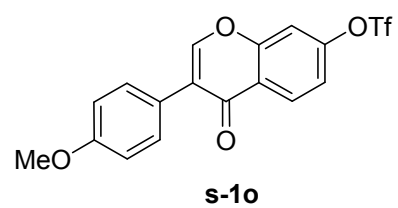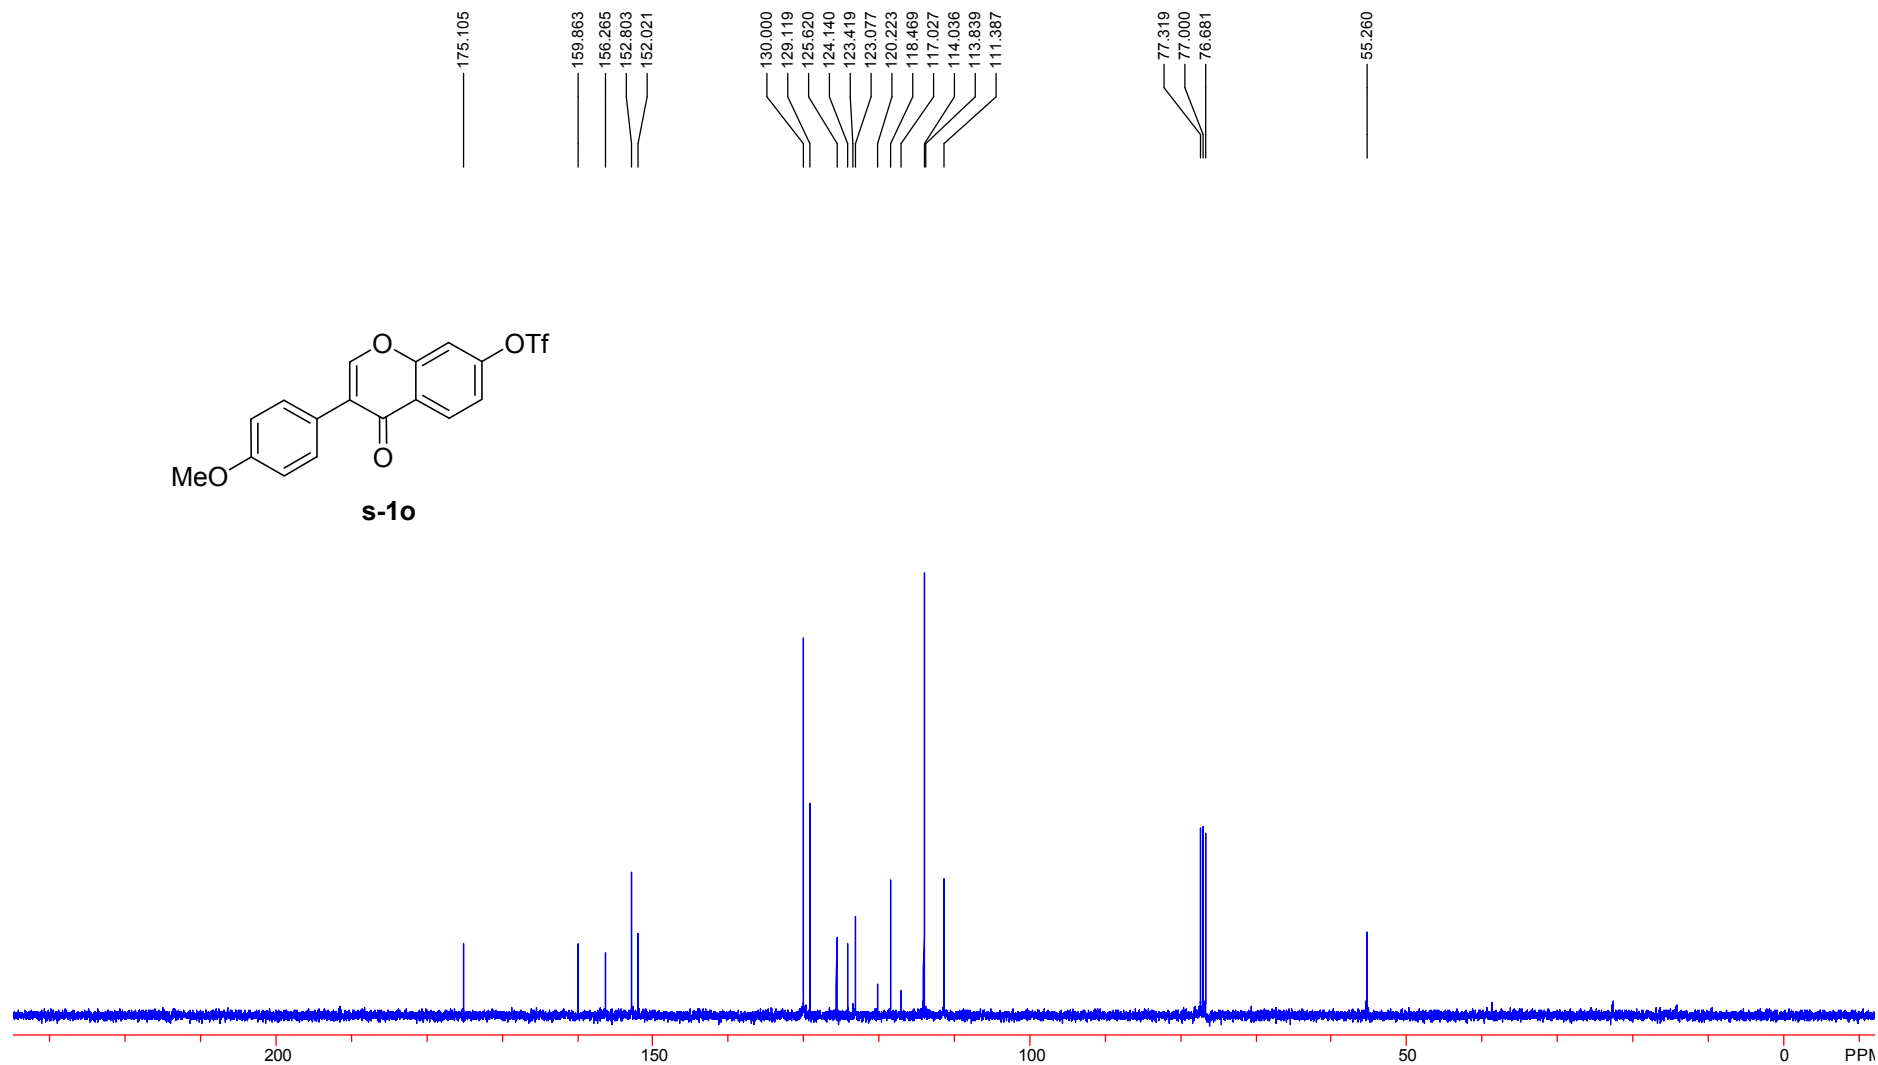

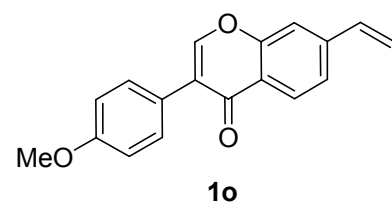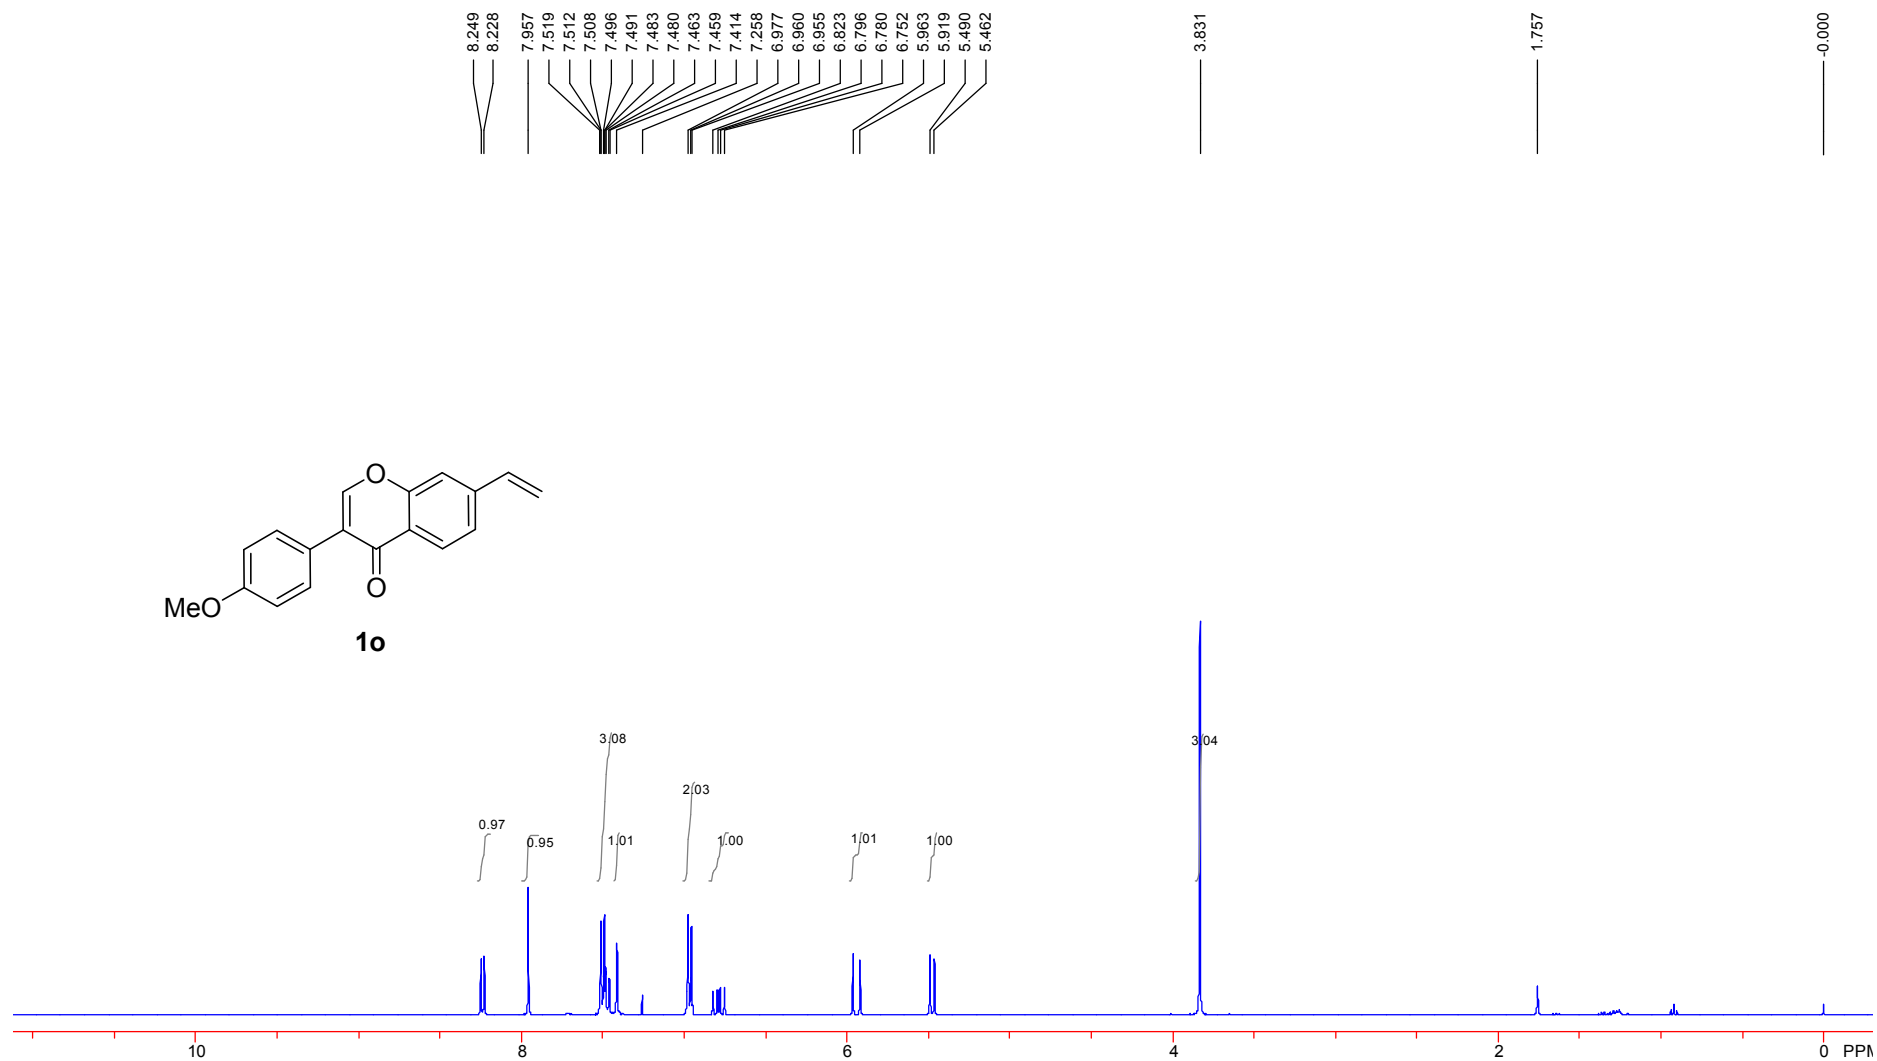

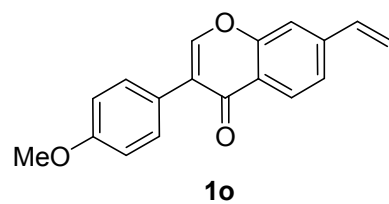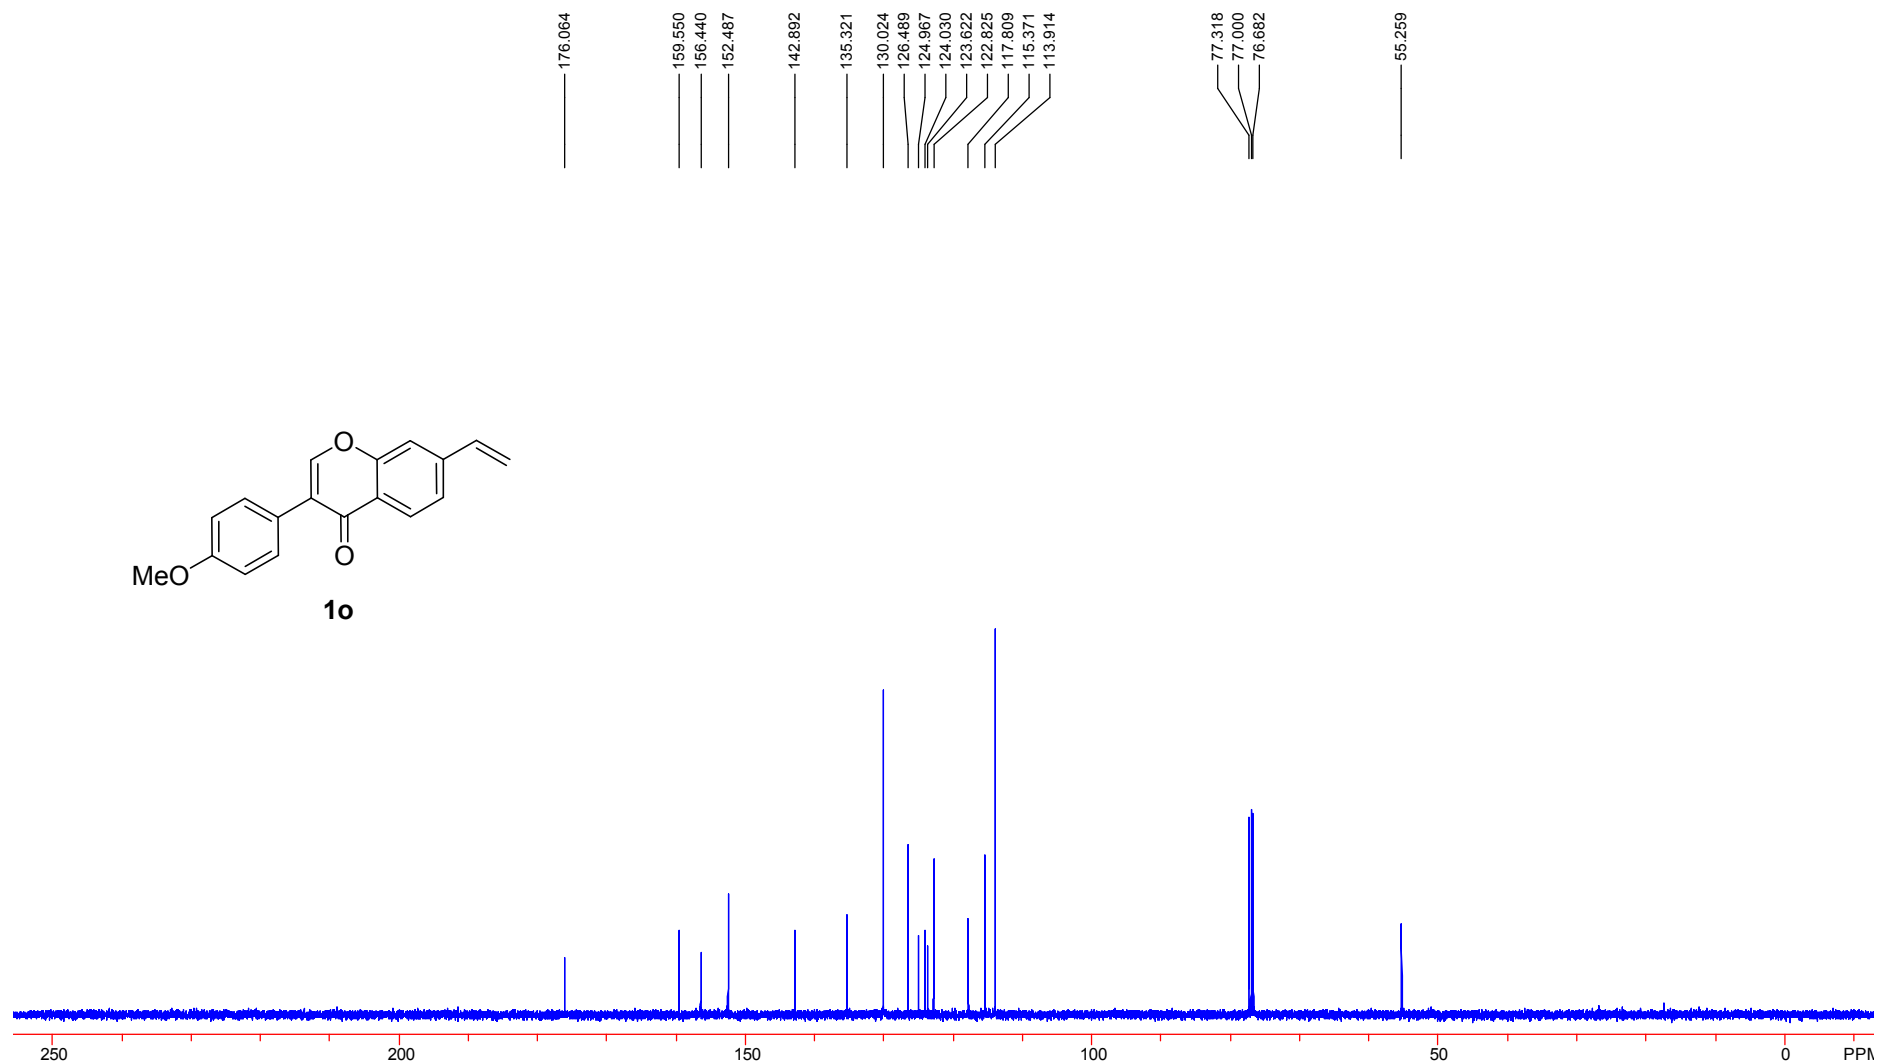

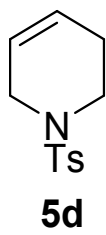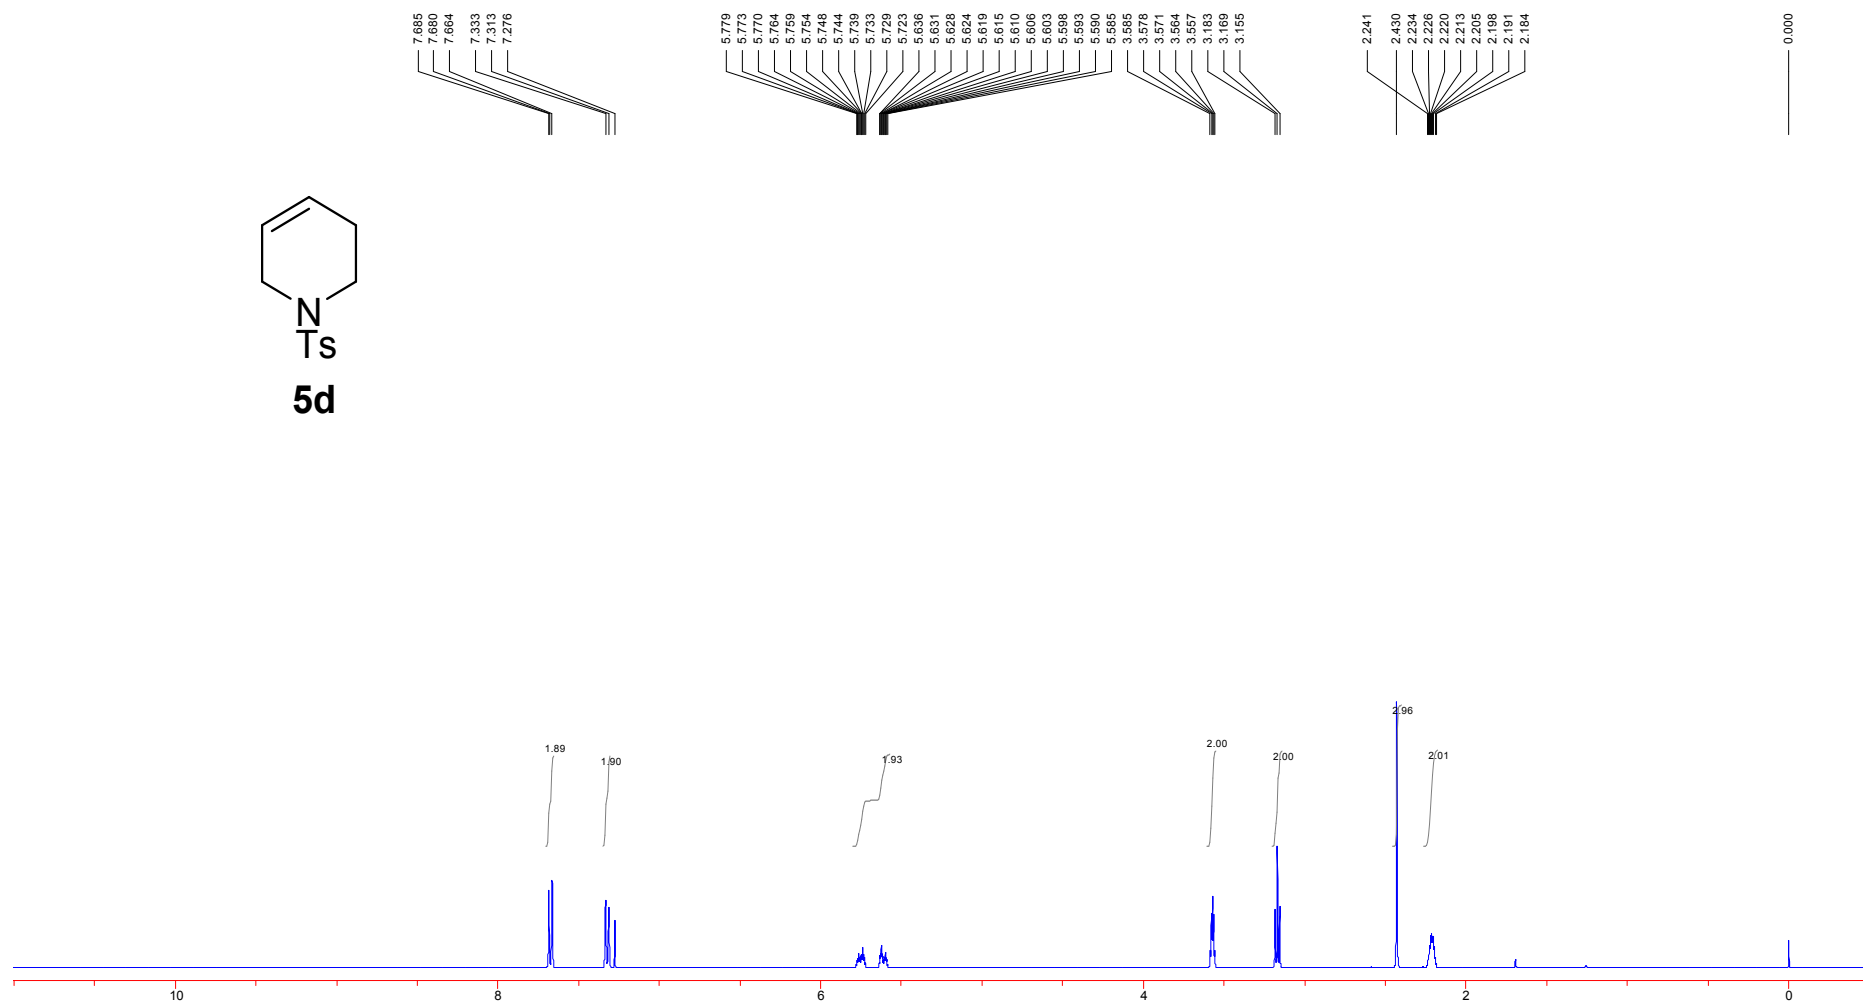

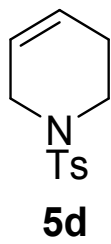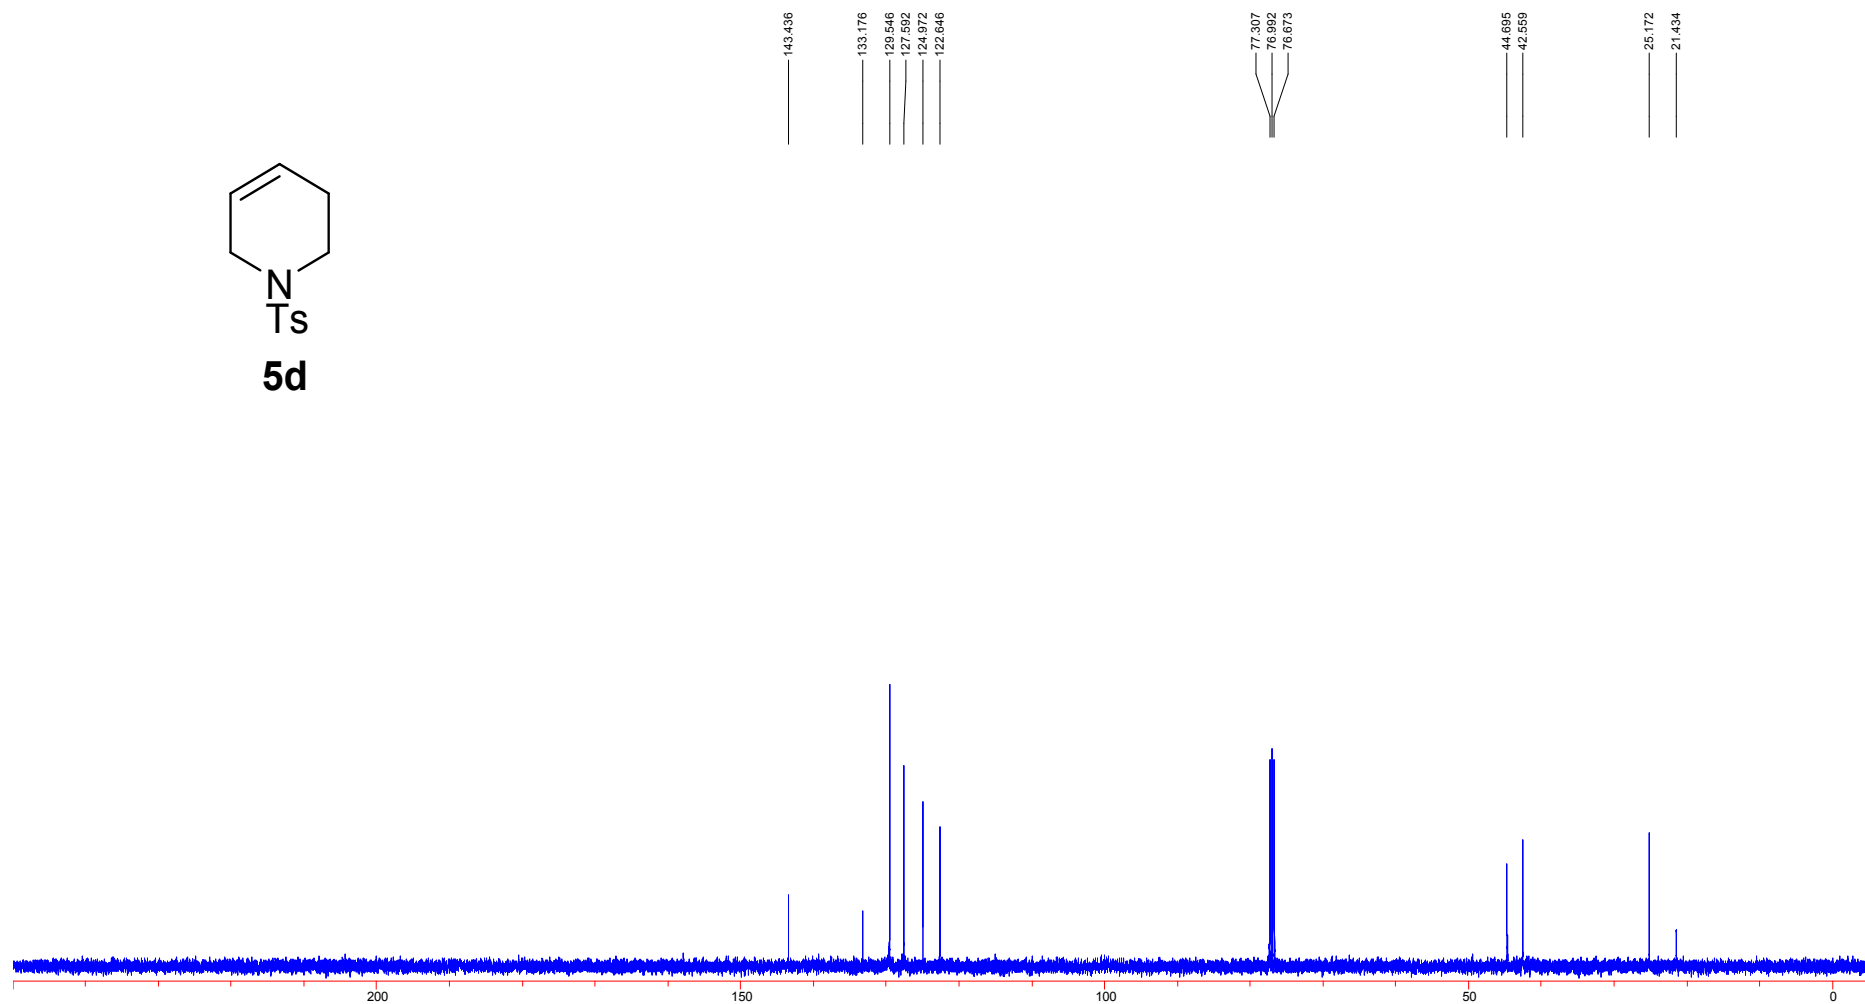

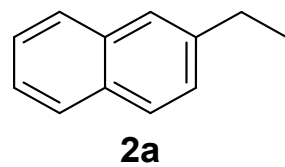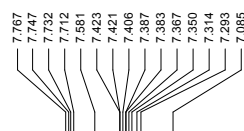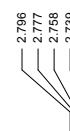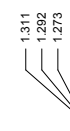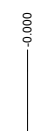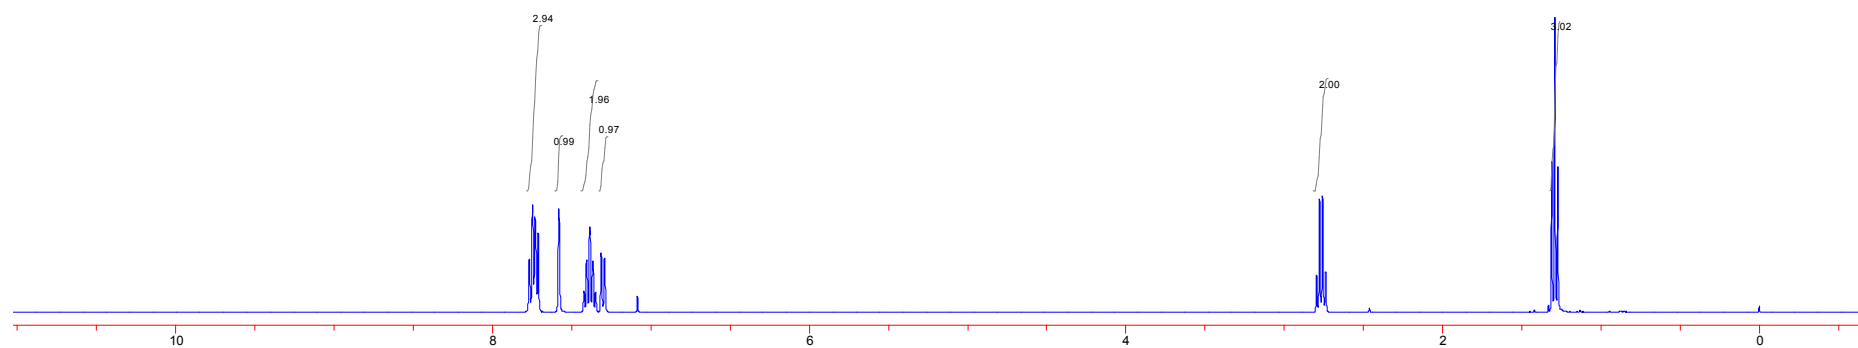

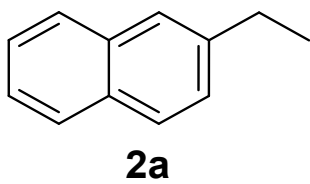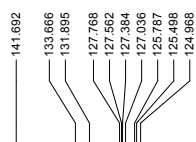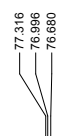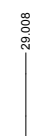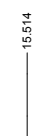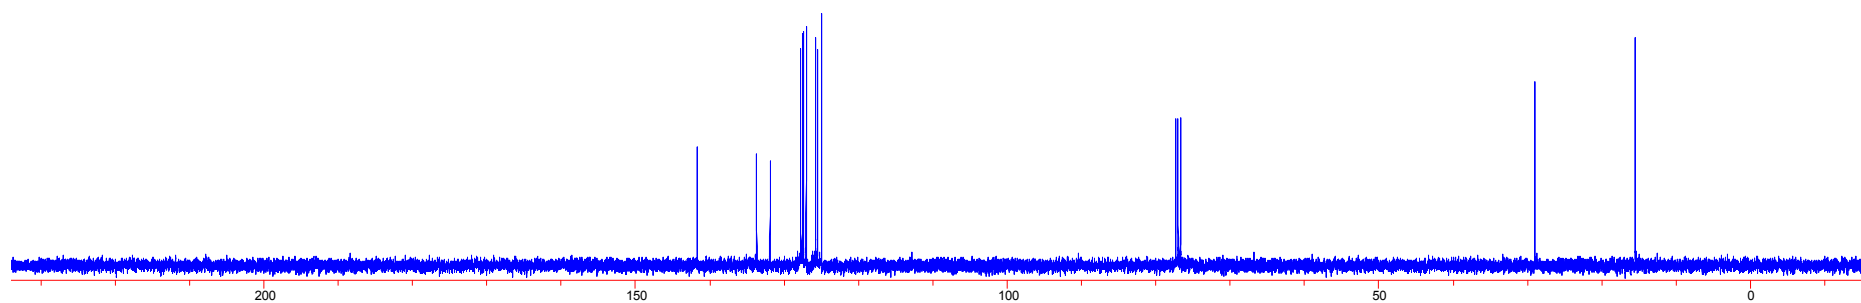

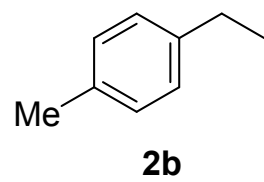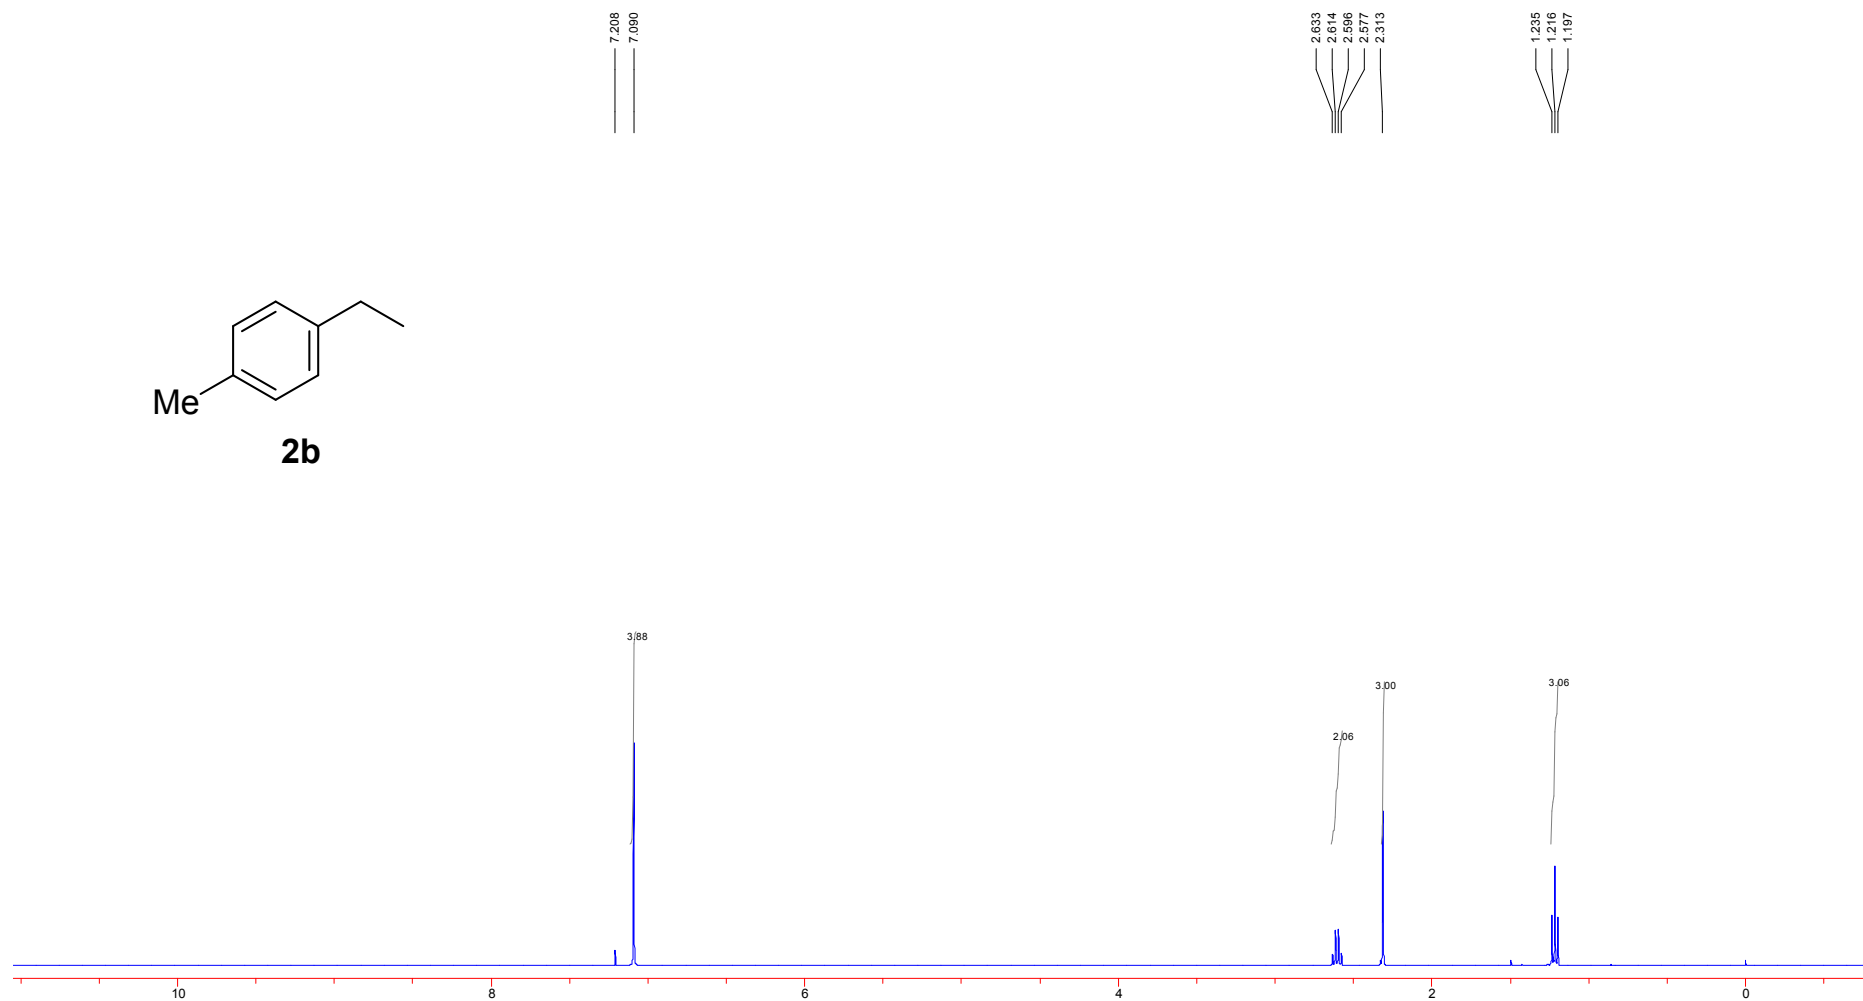

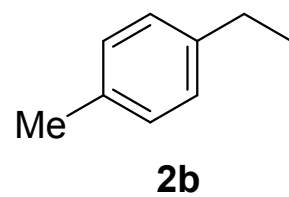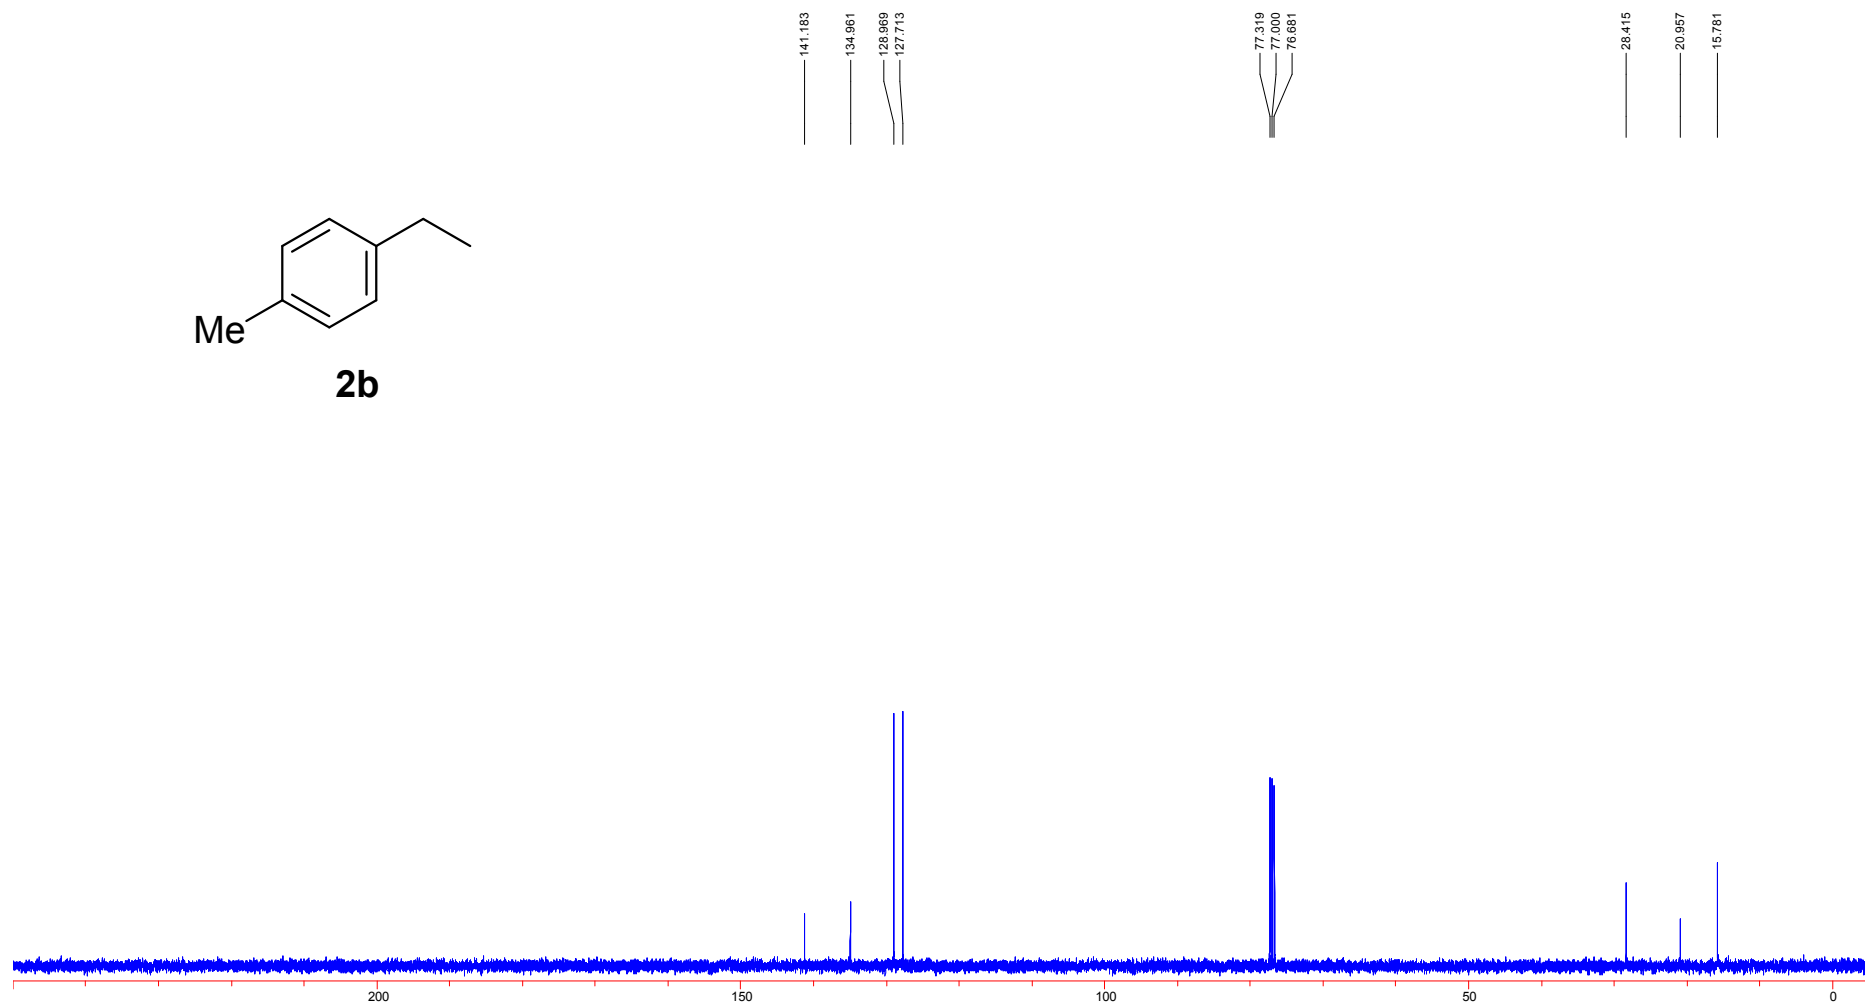

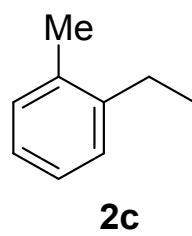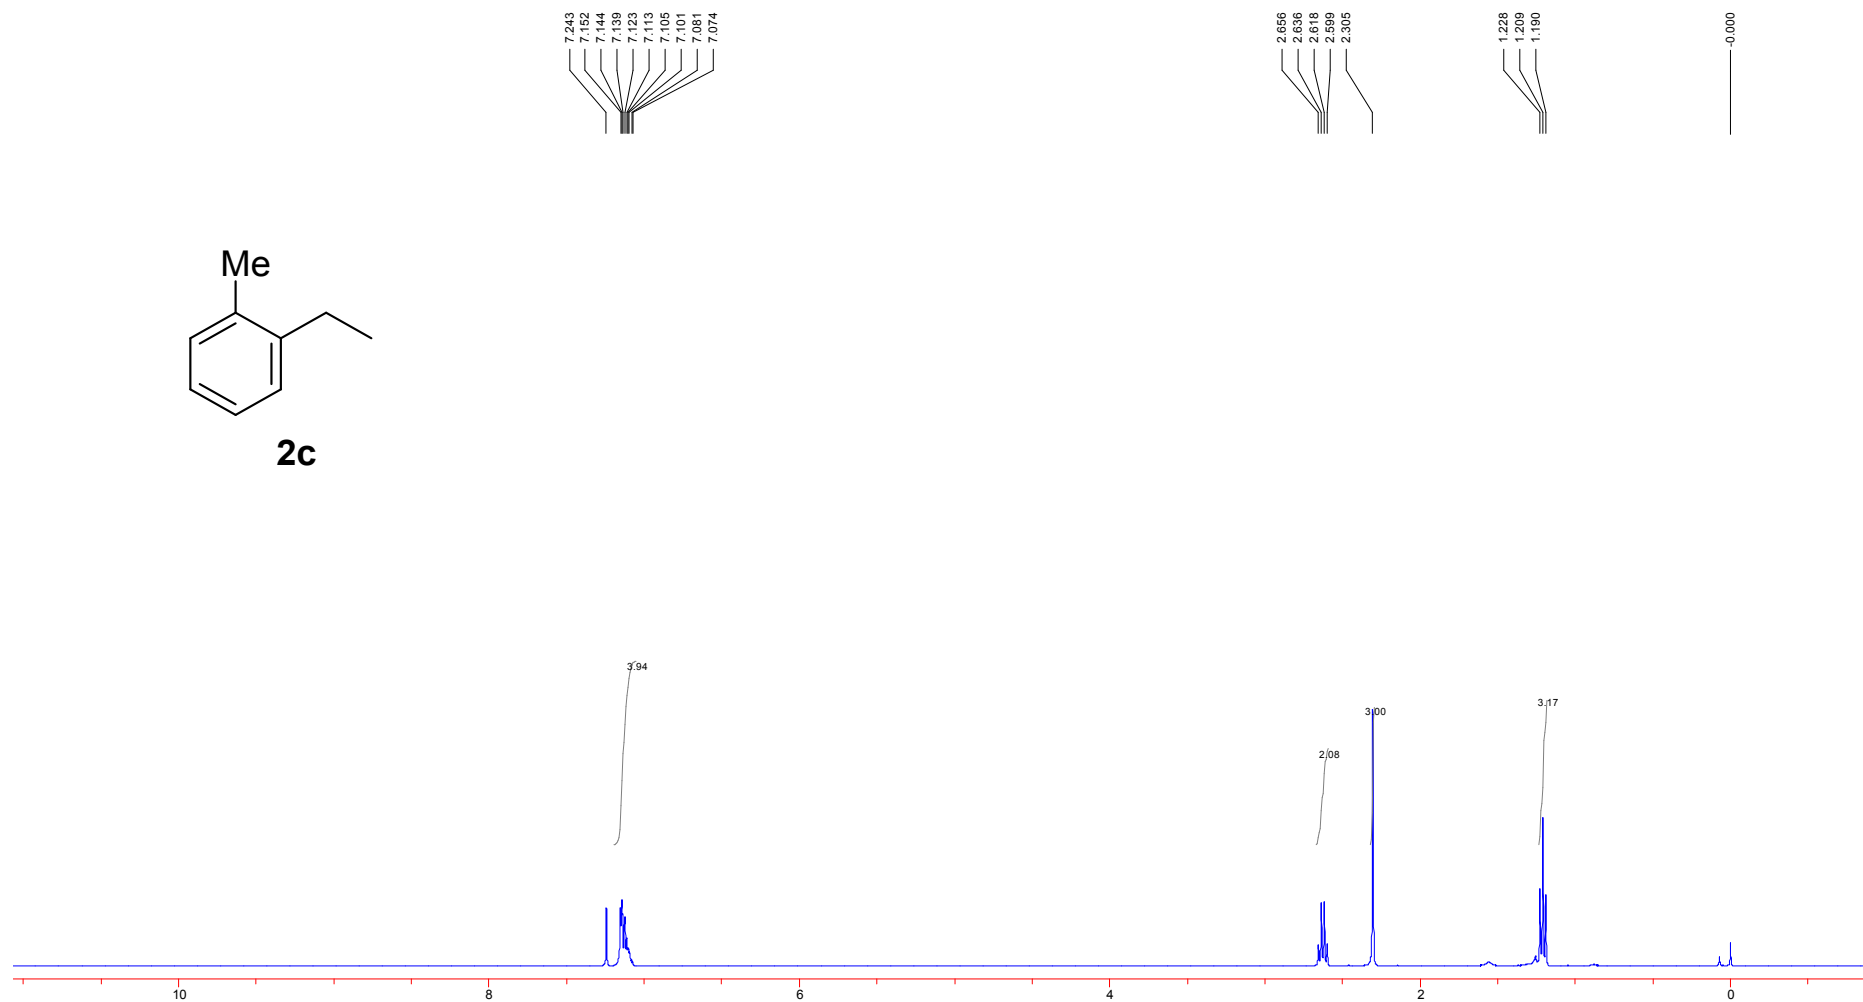

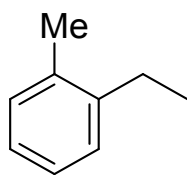

**2c**

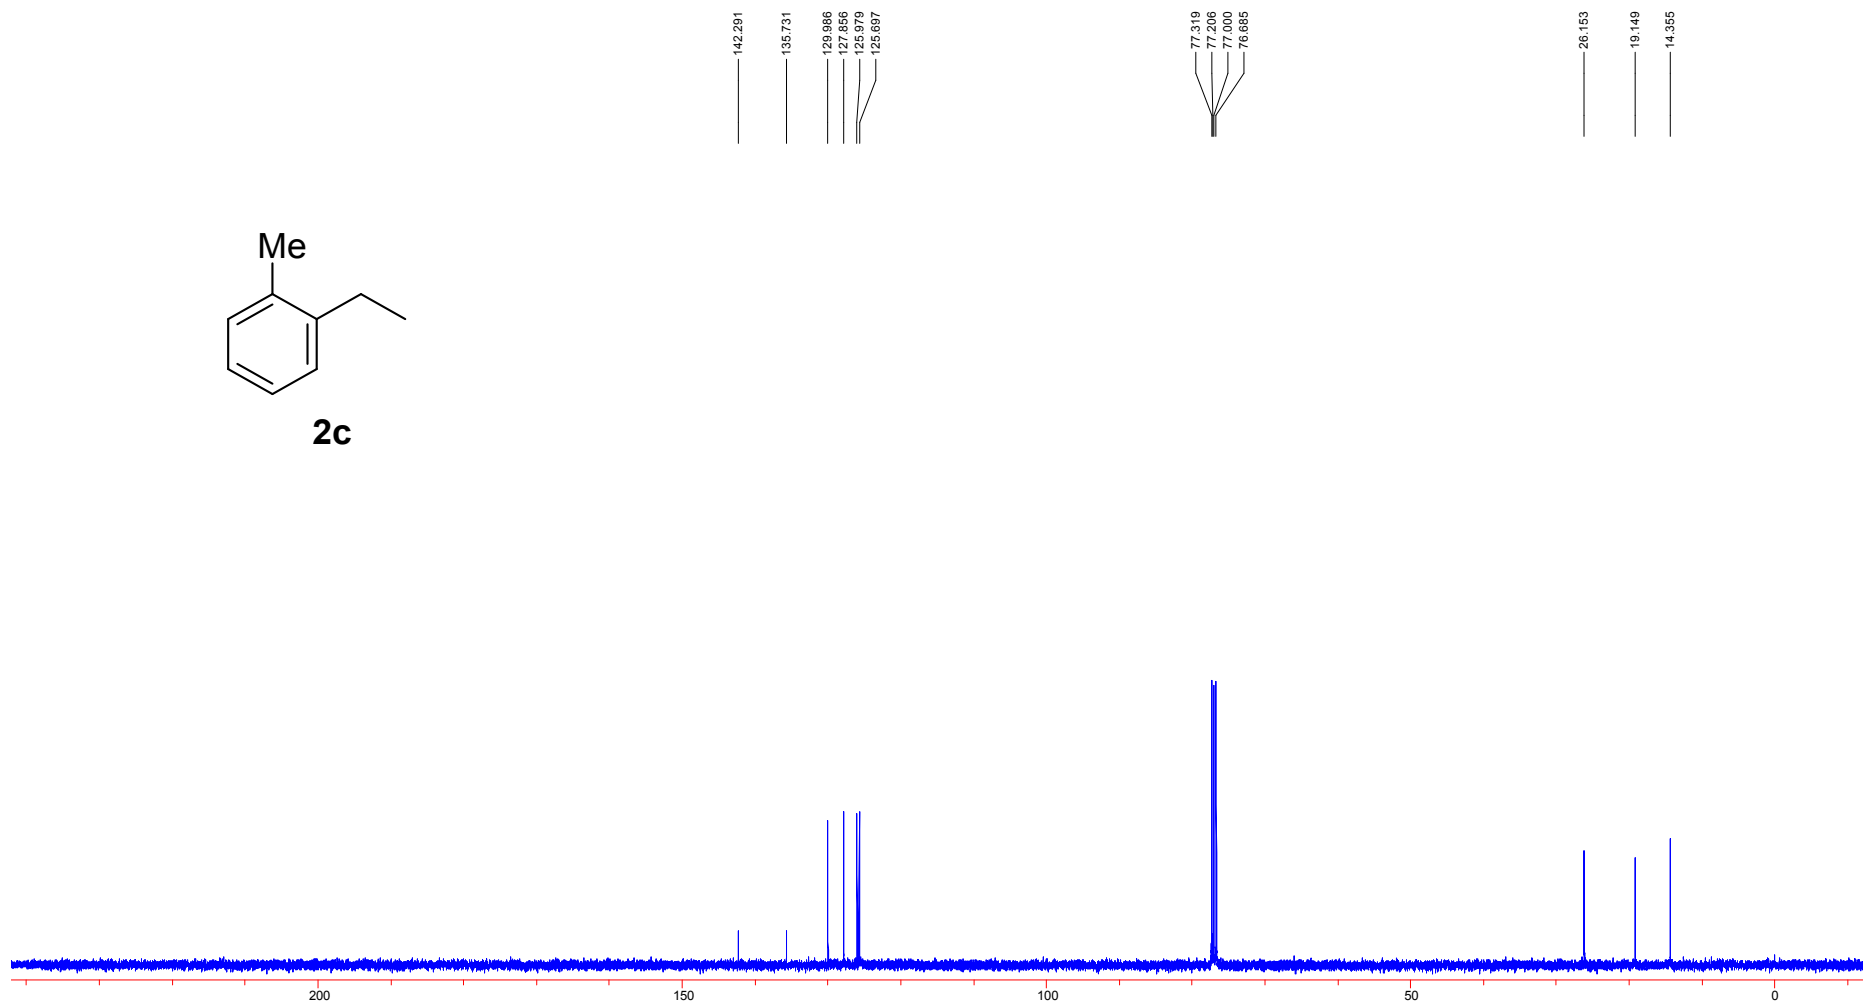

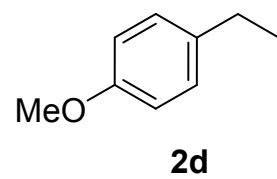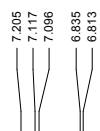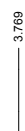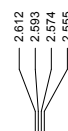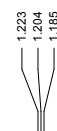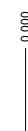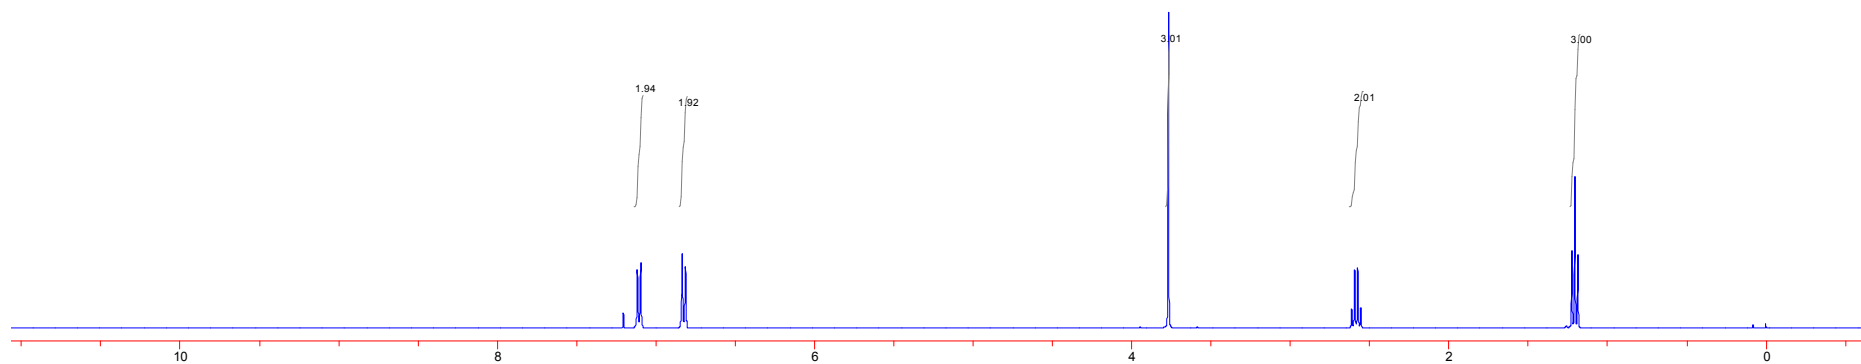

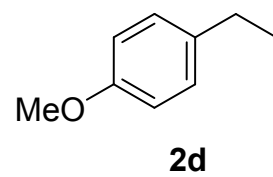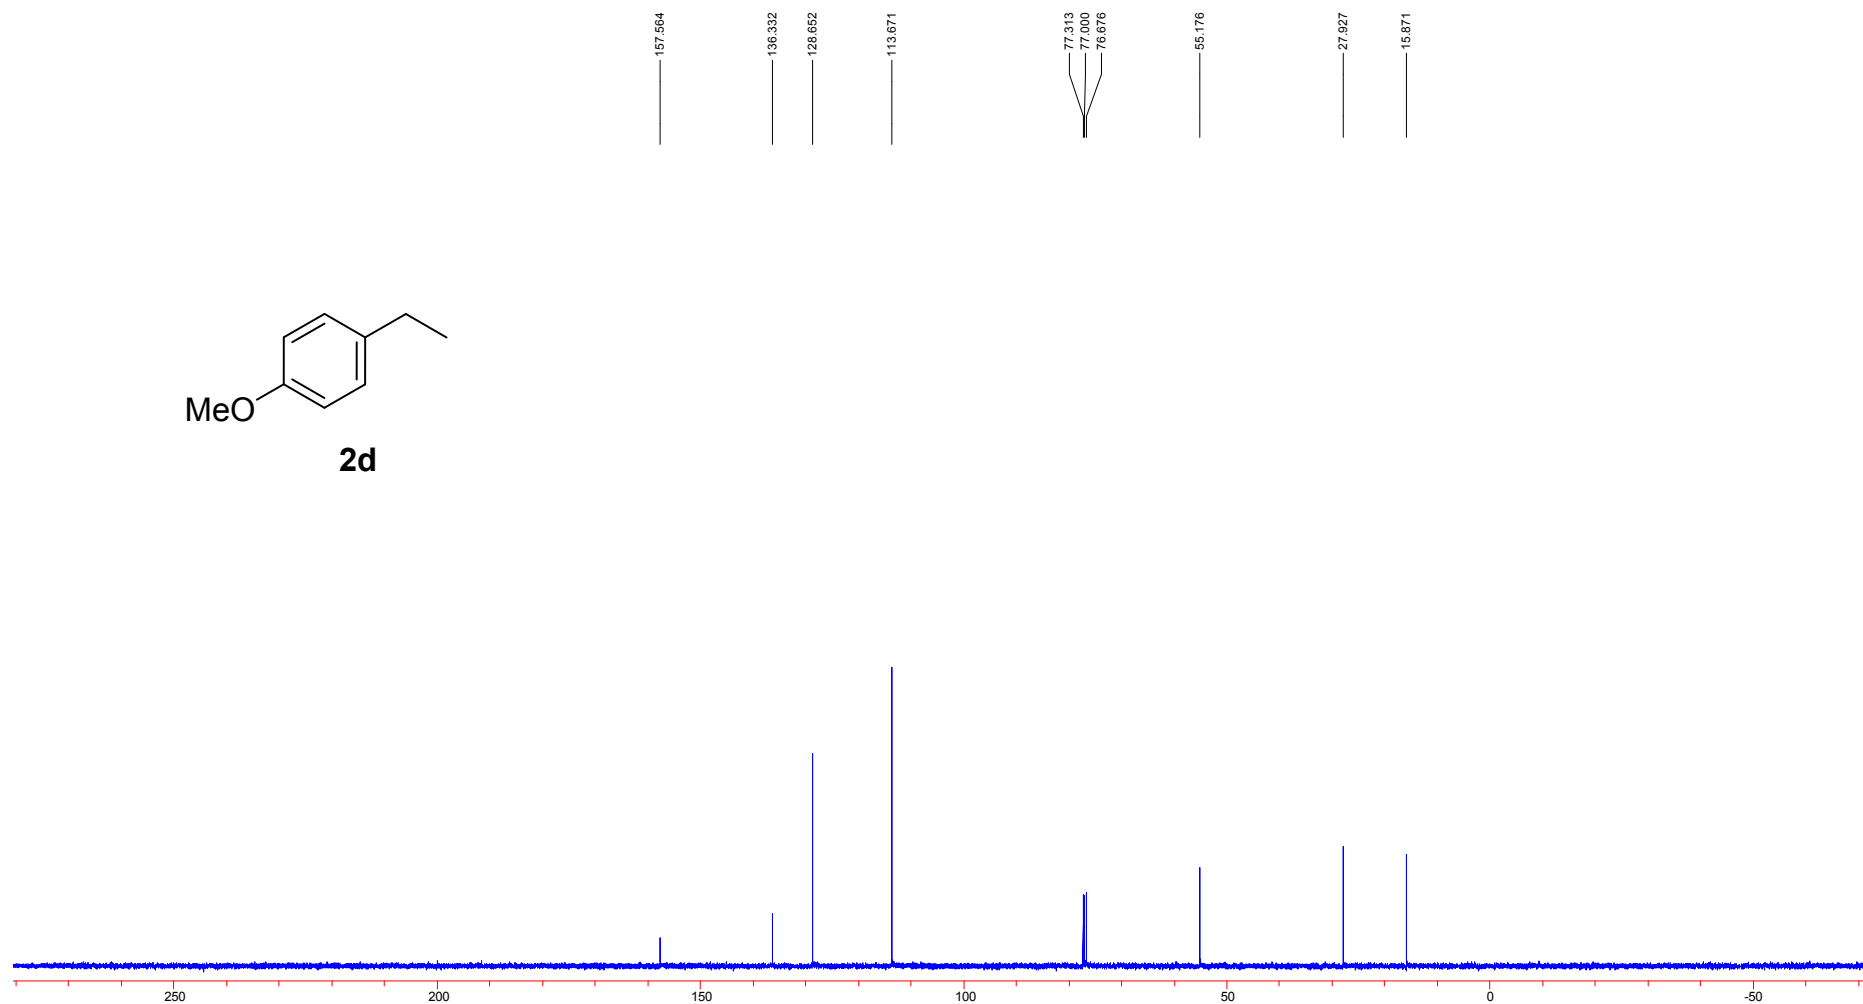

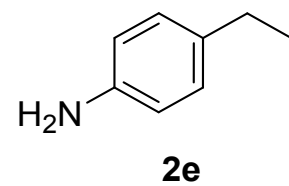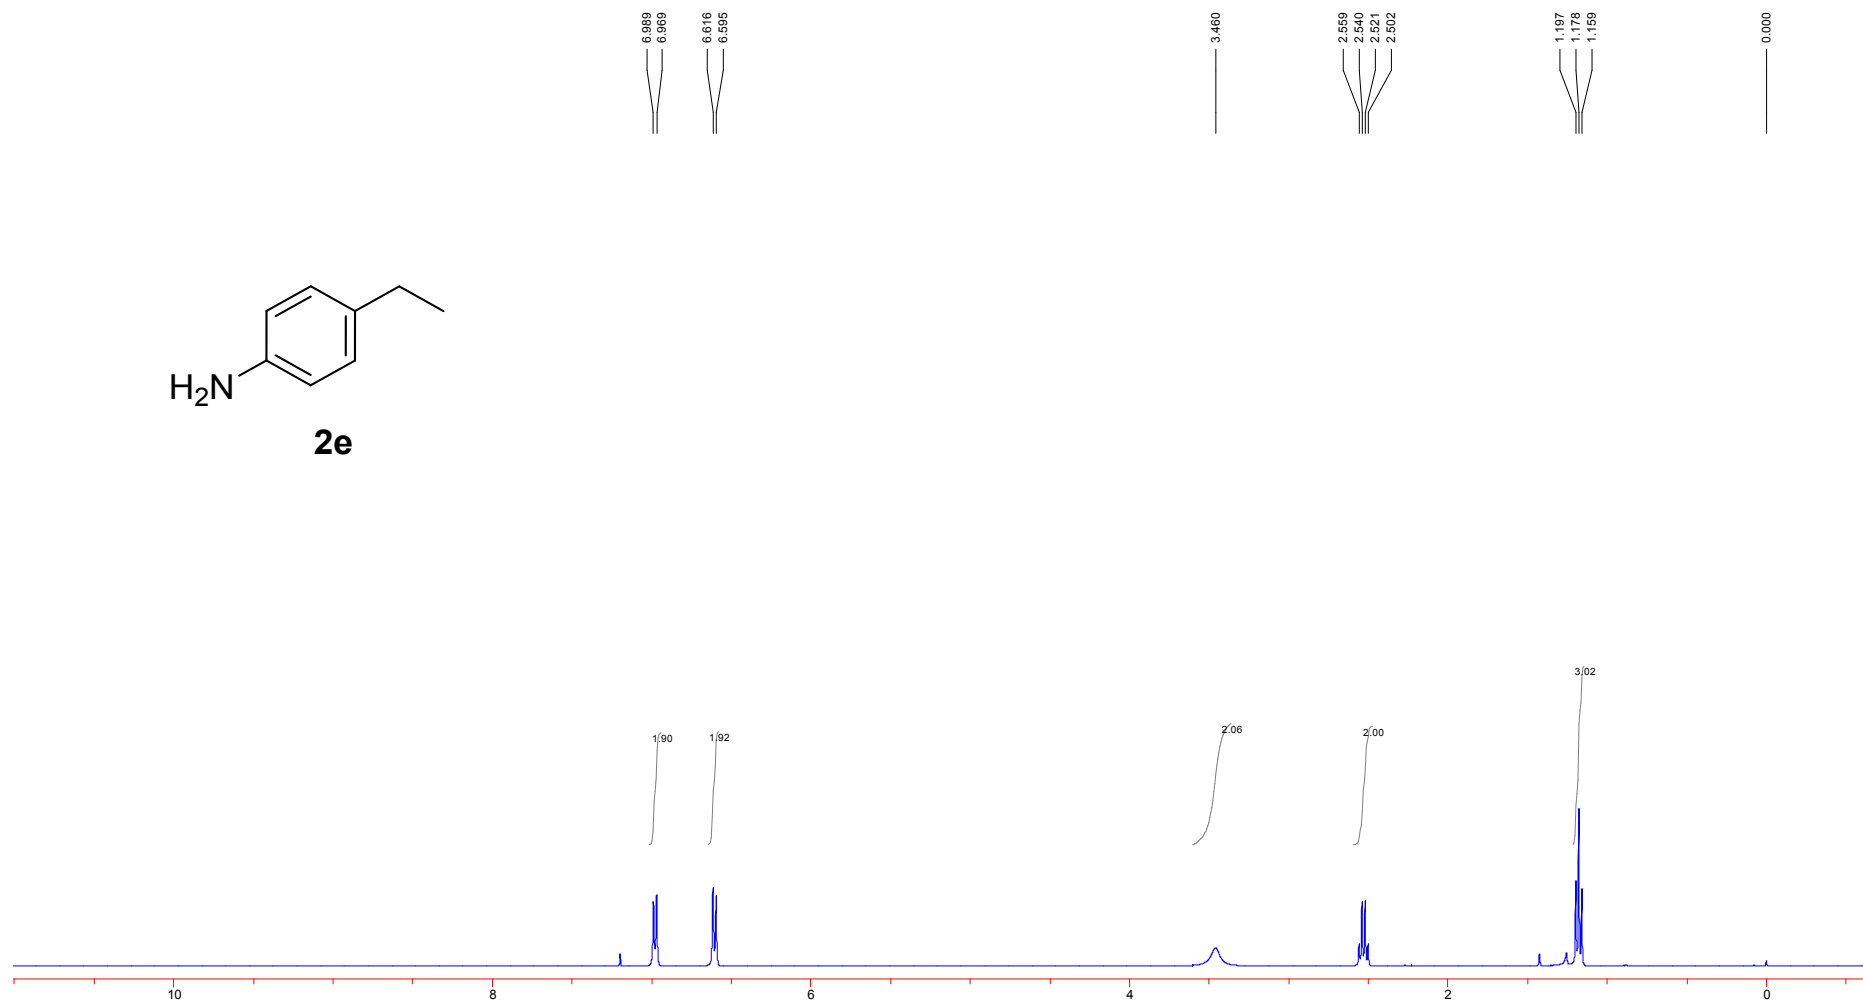

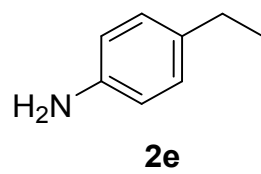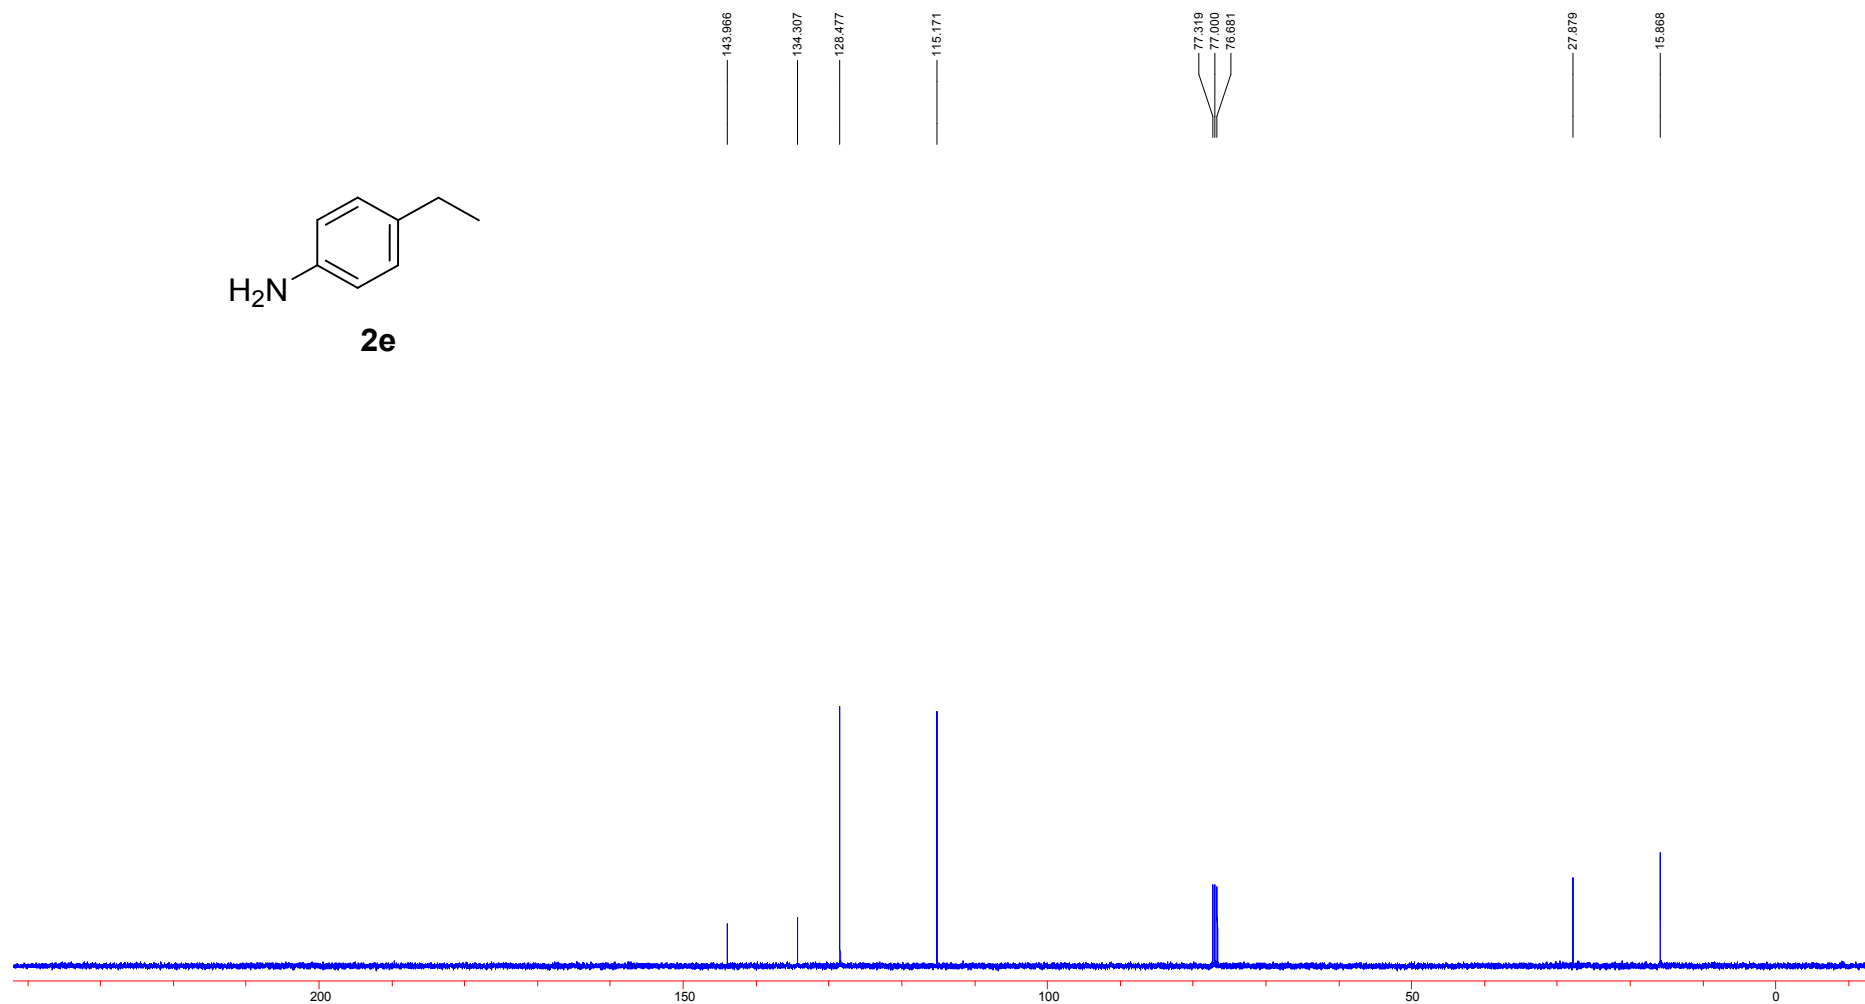

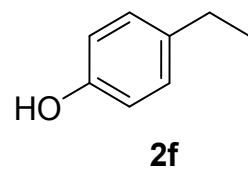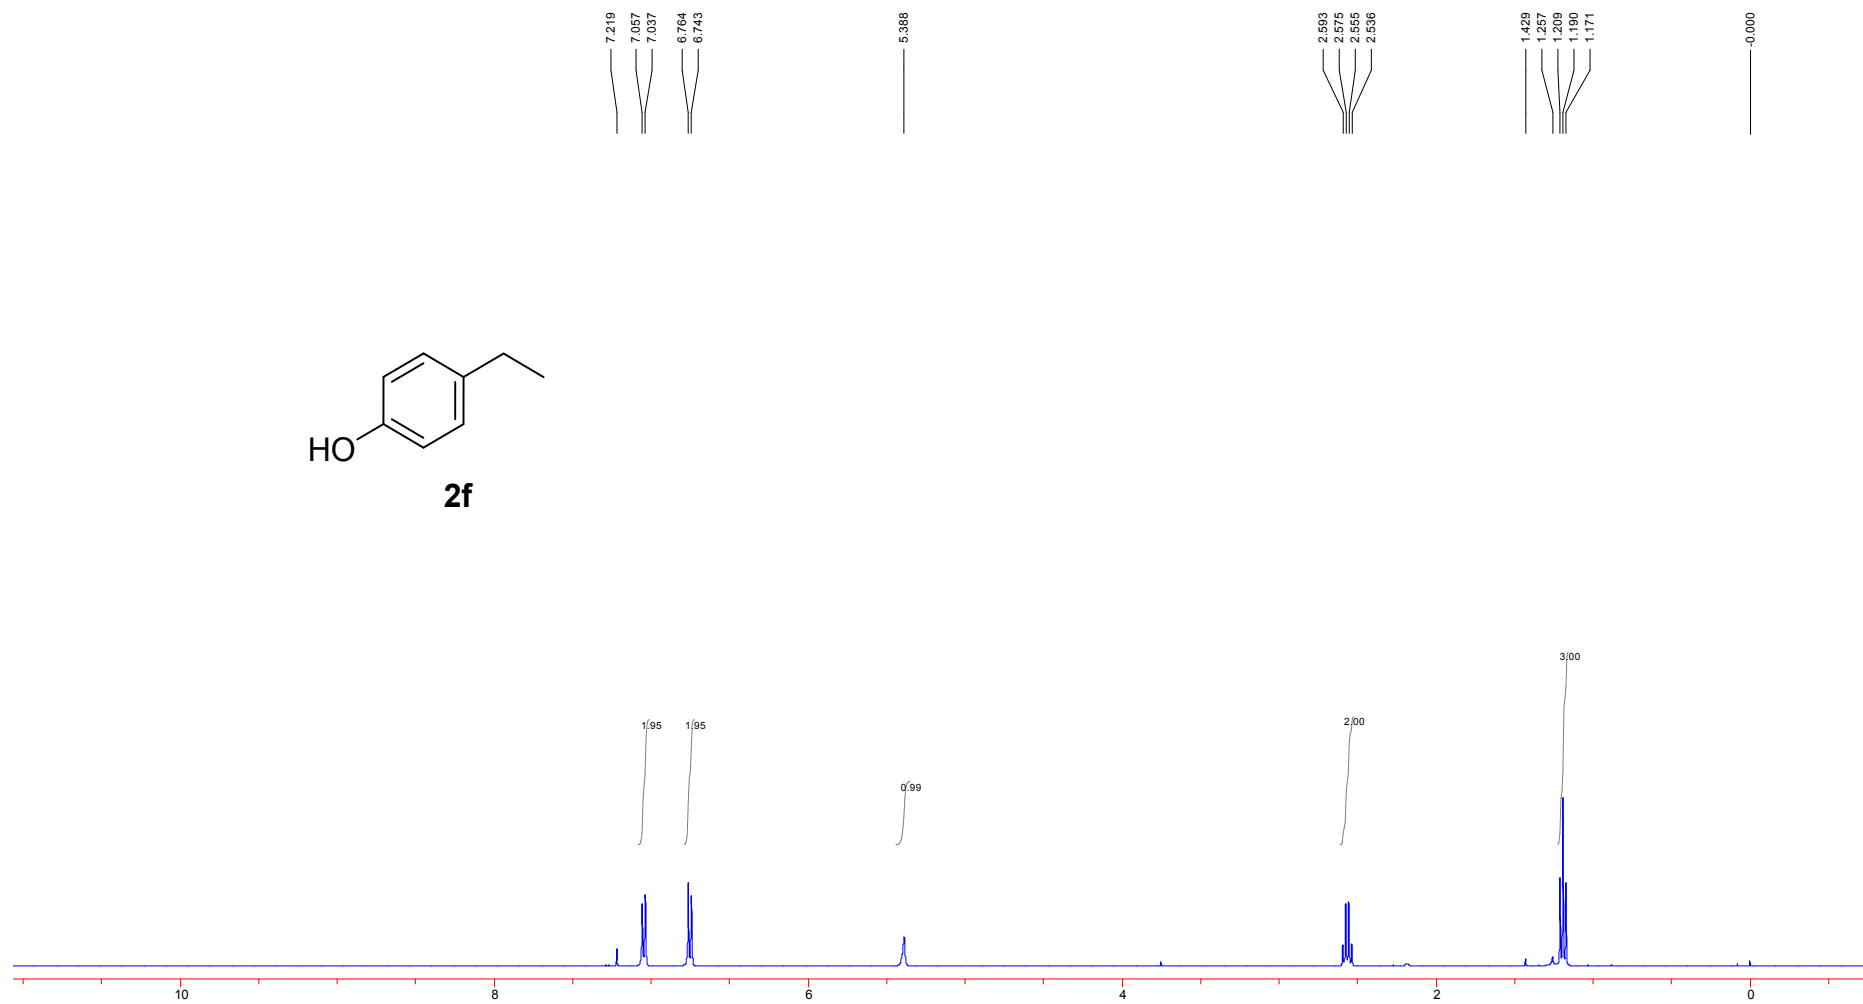

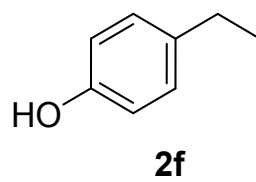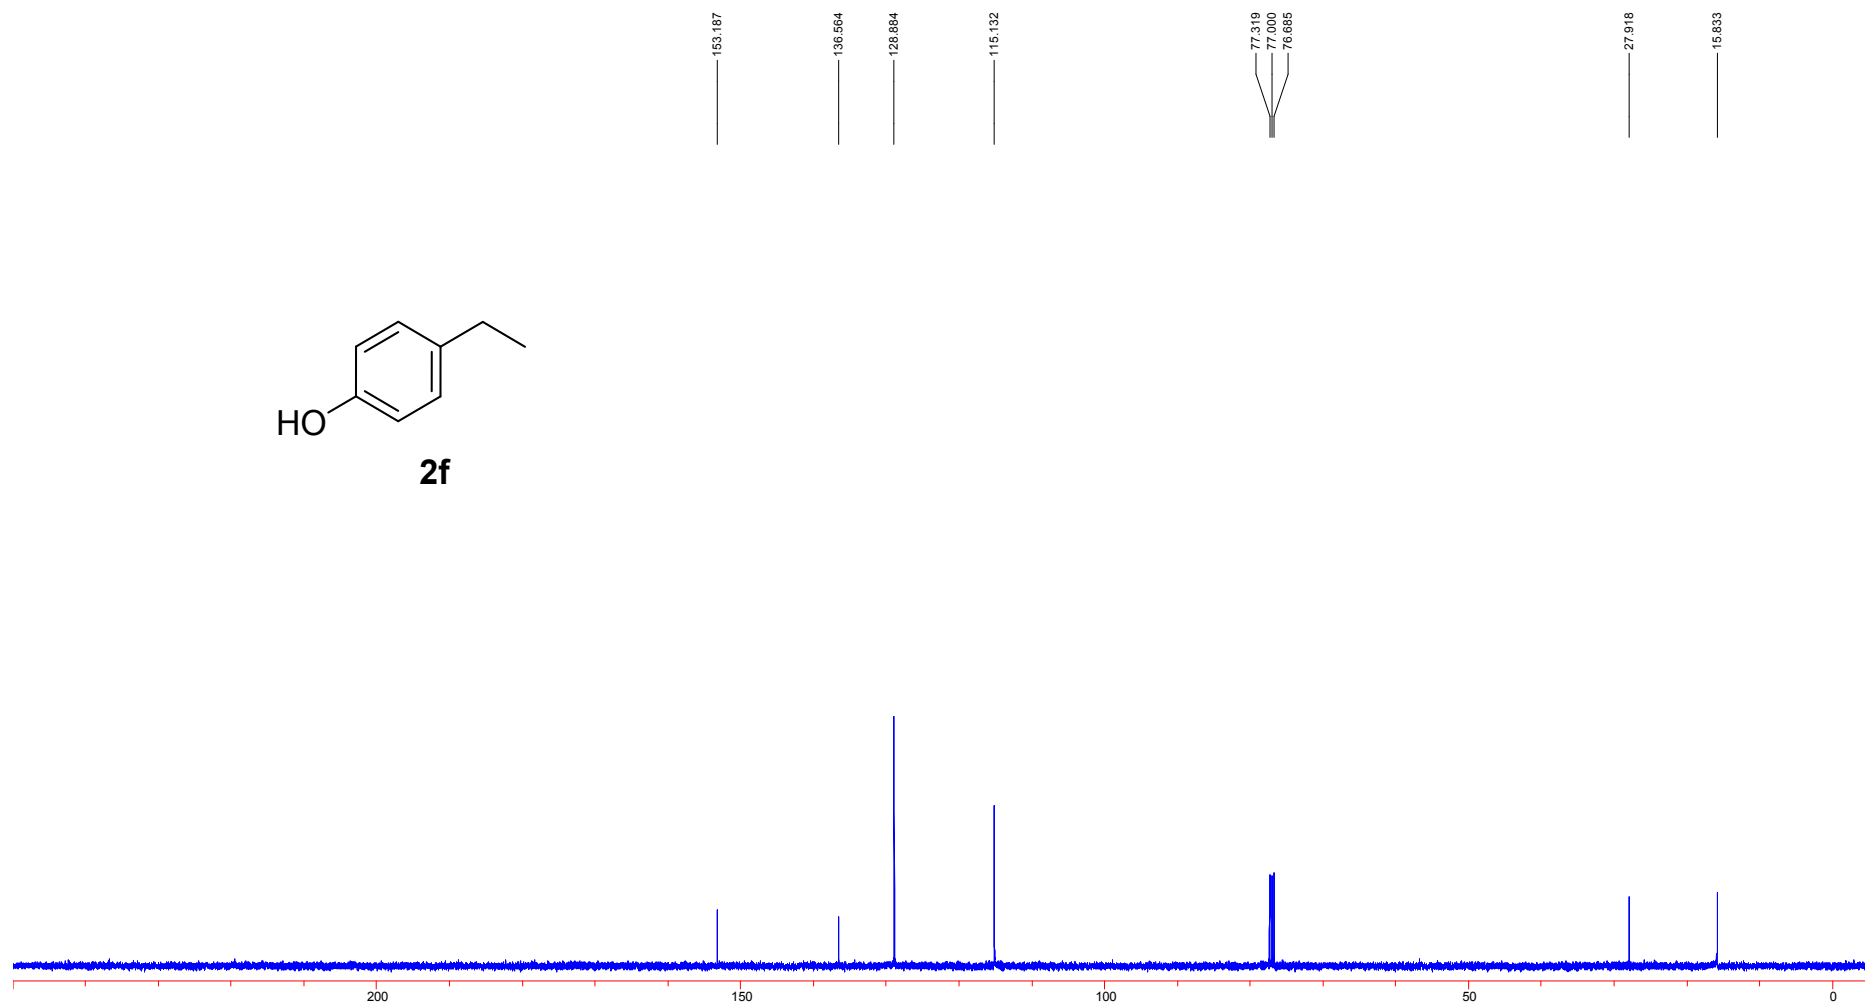

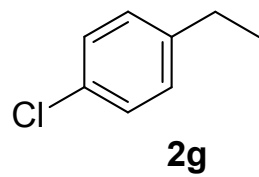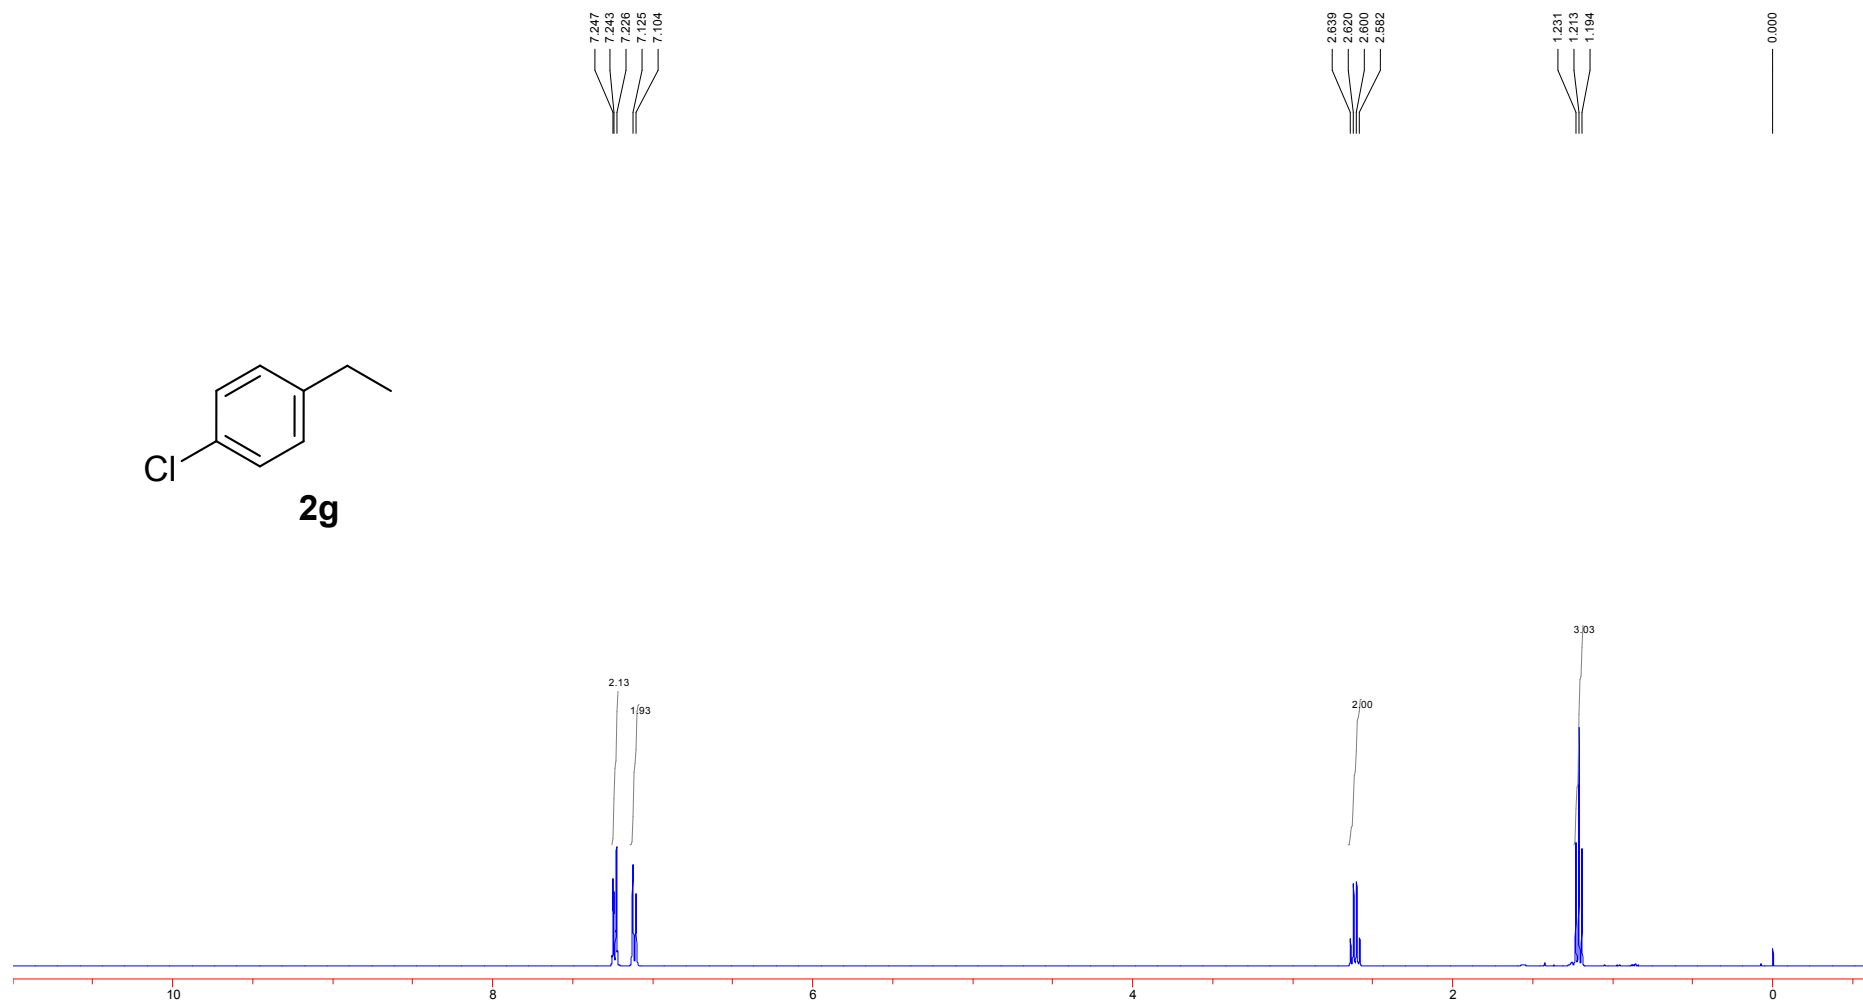

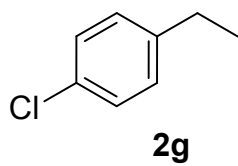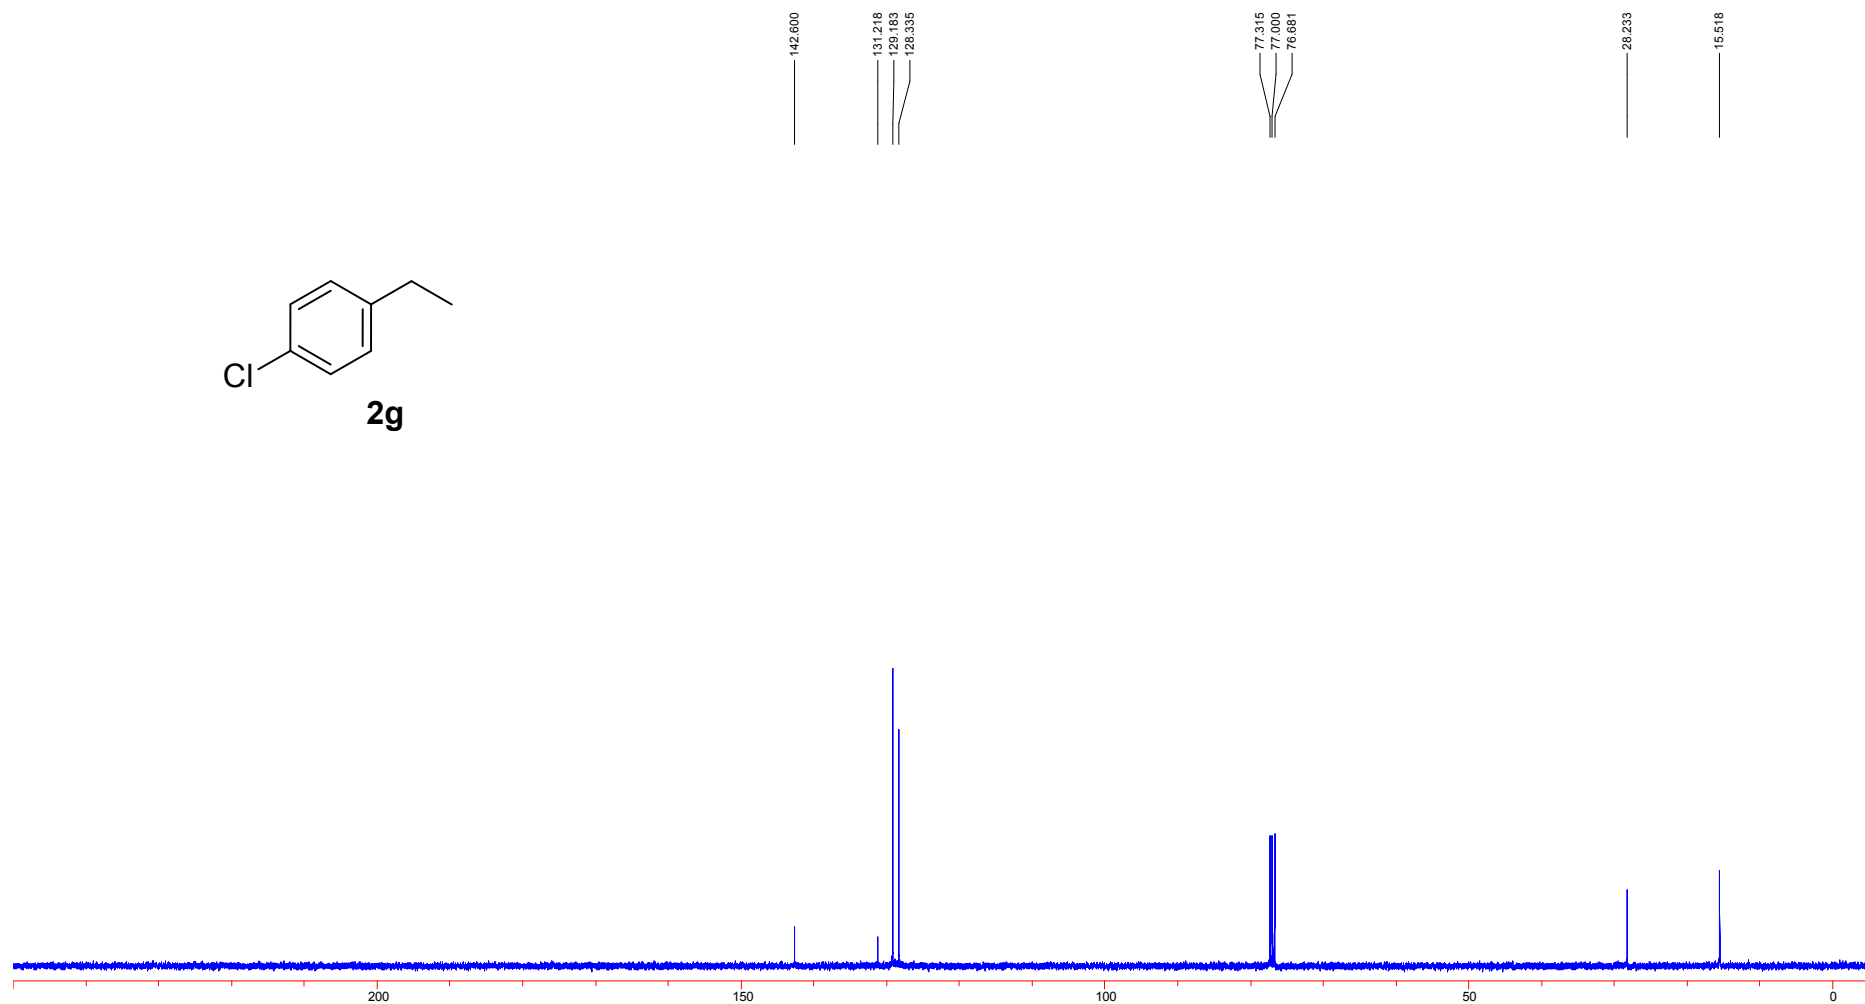

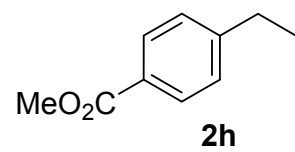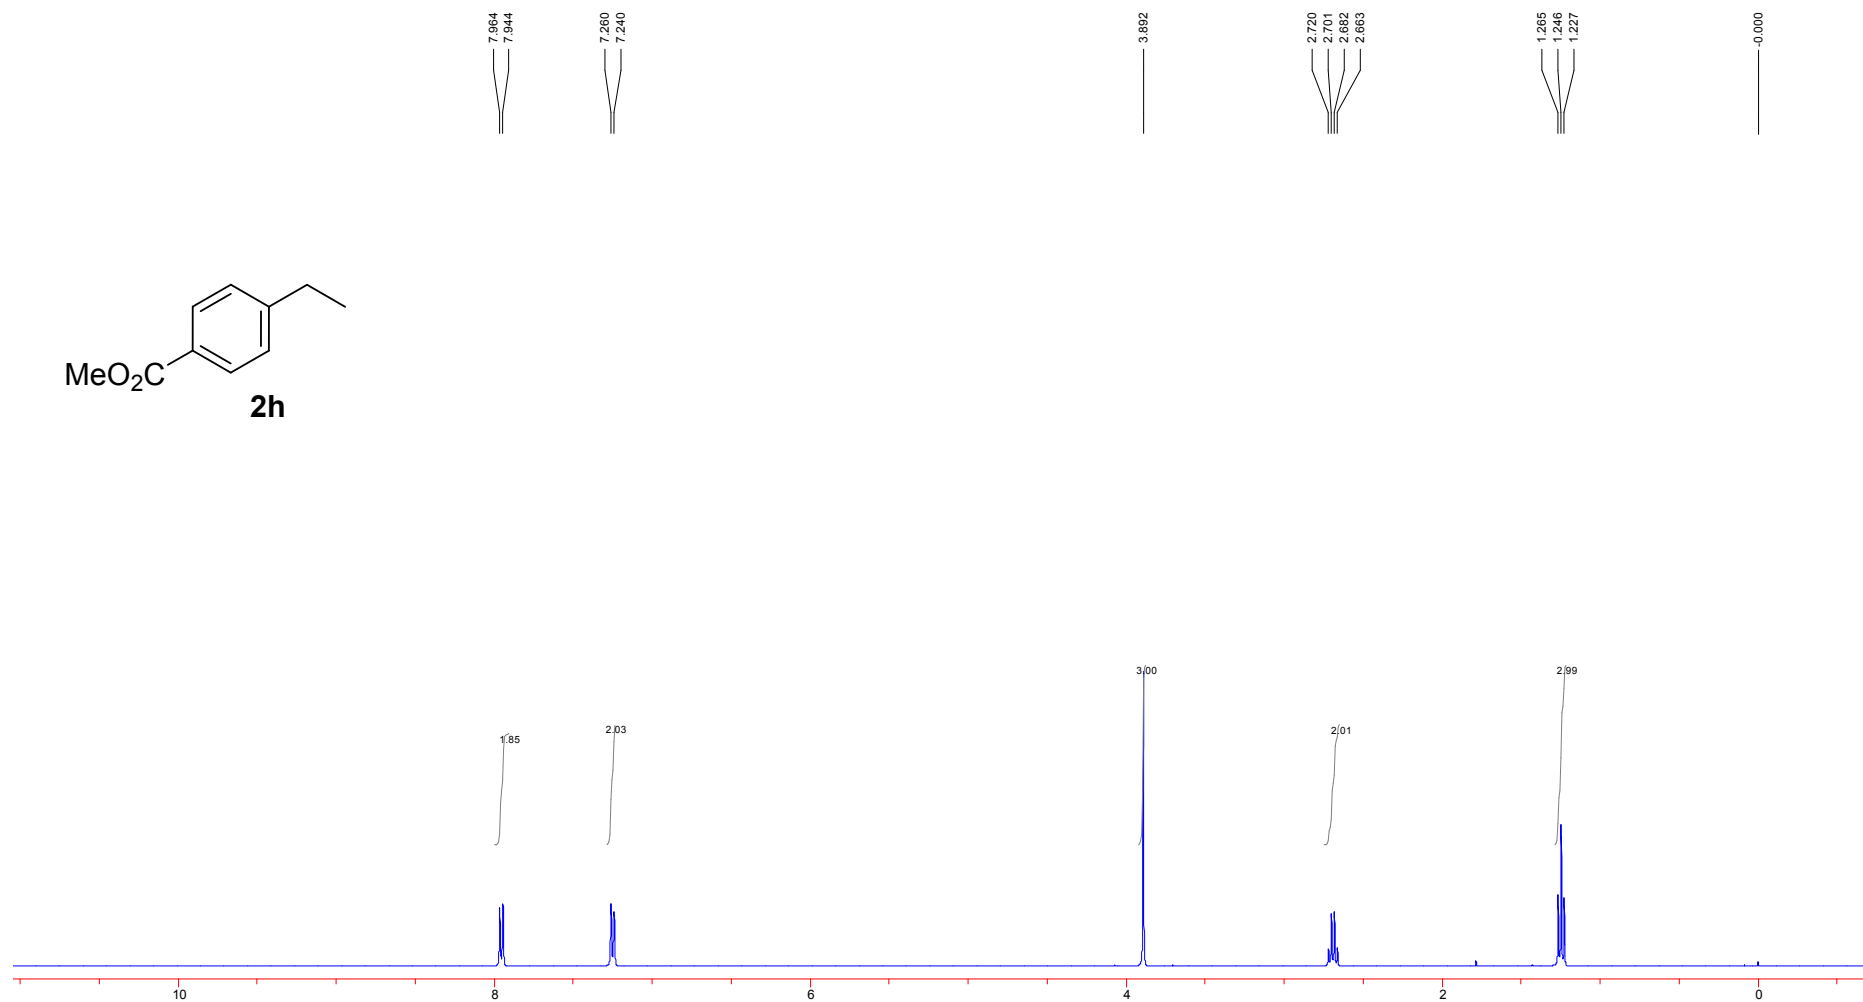

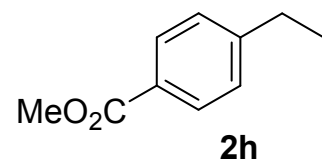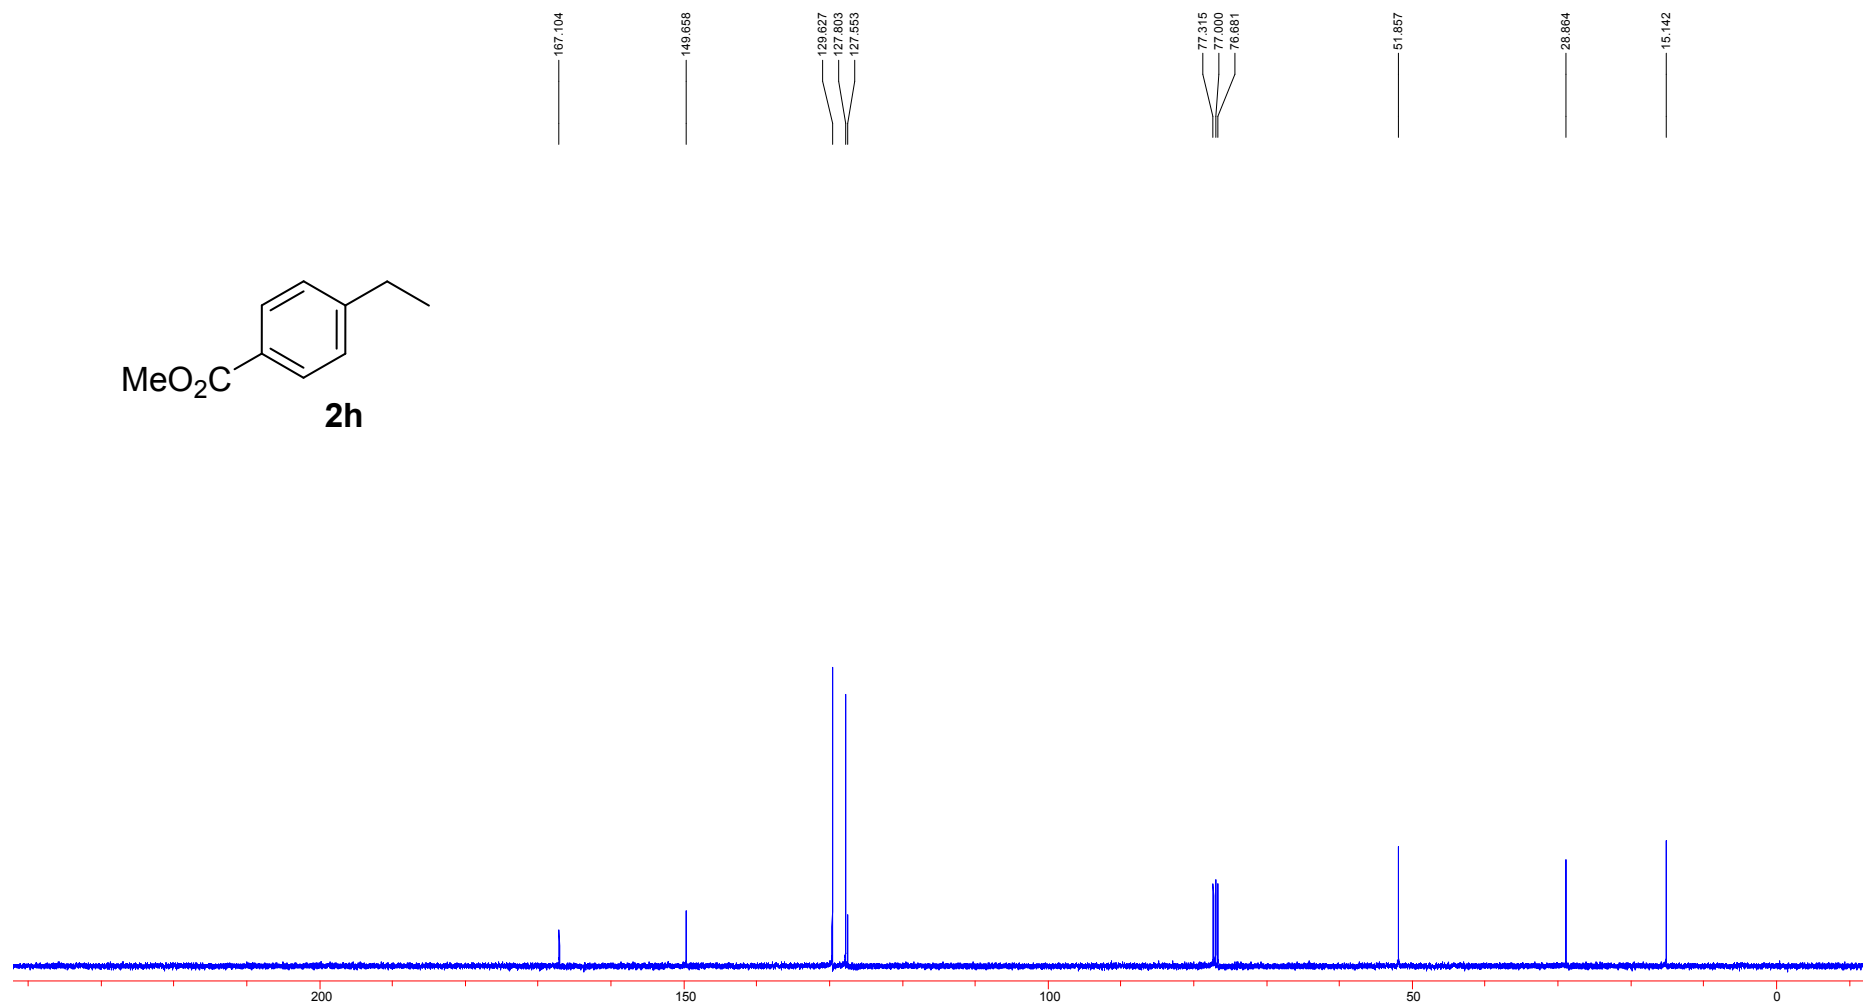

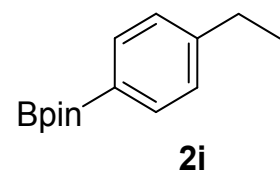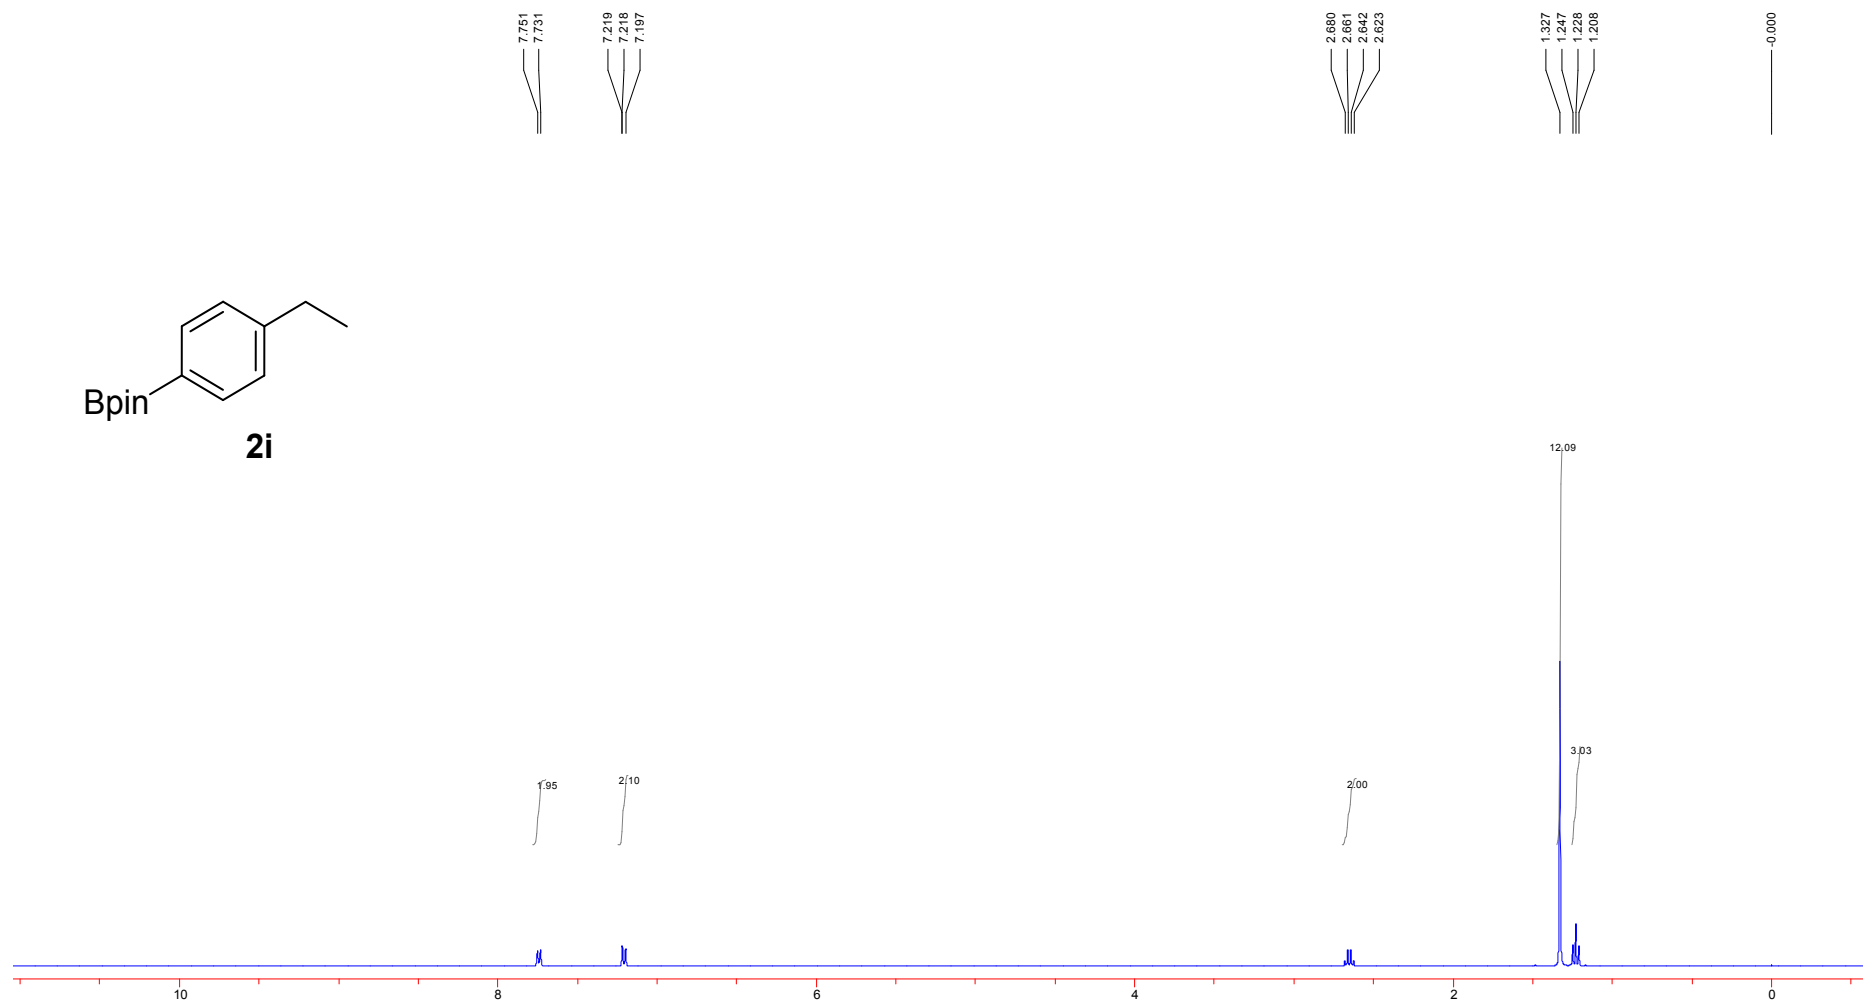

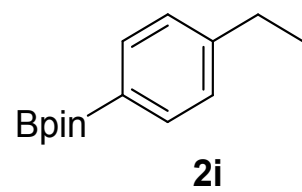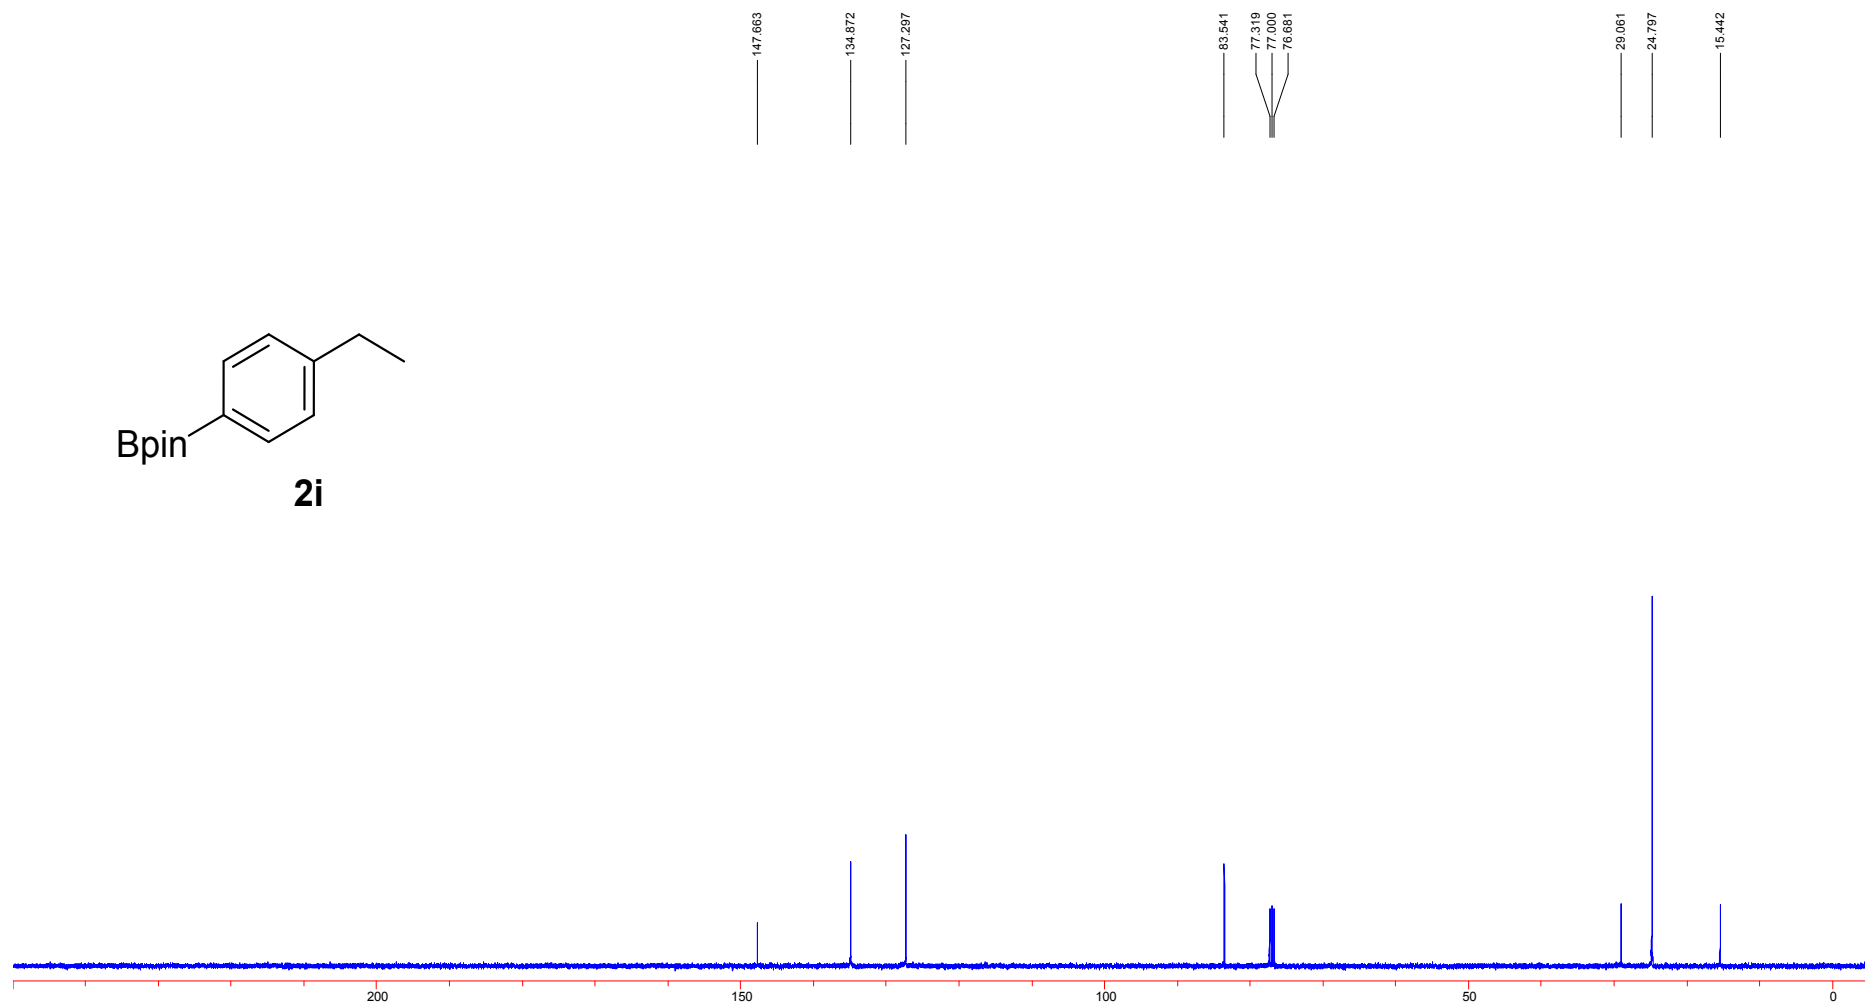

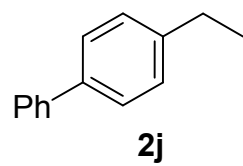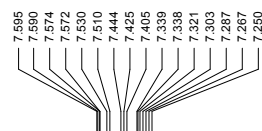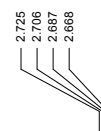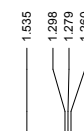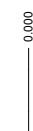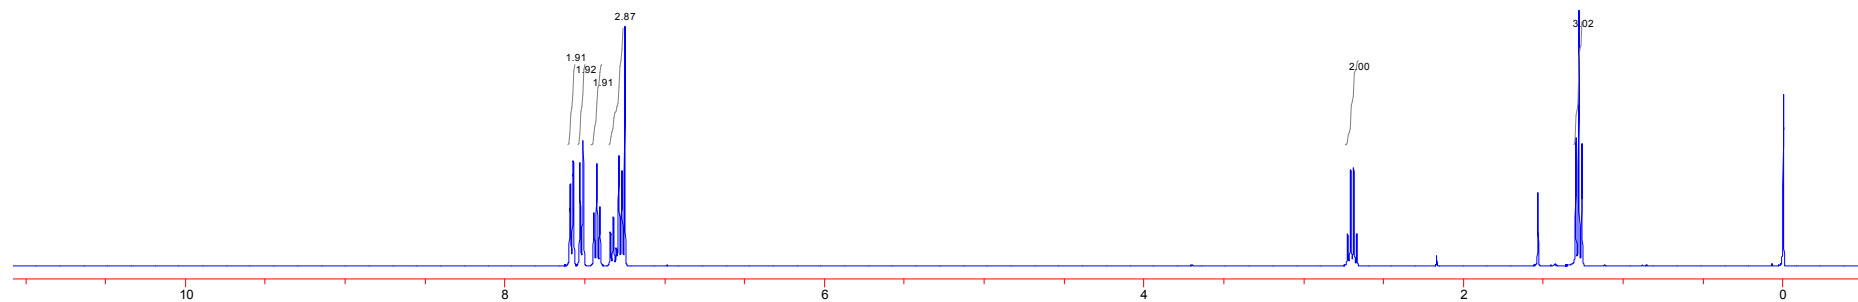

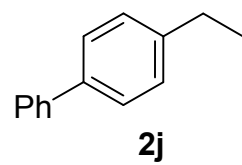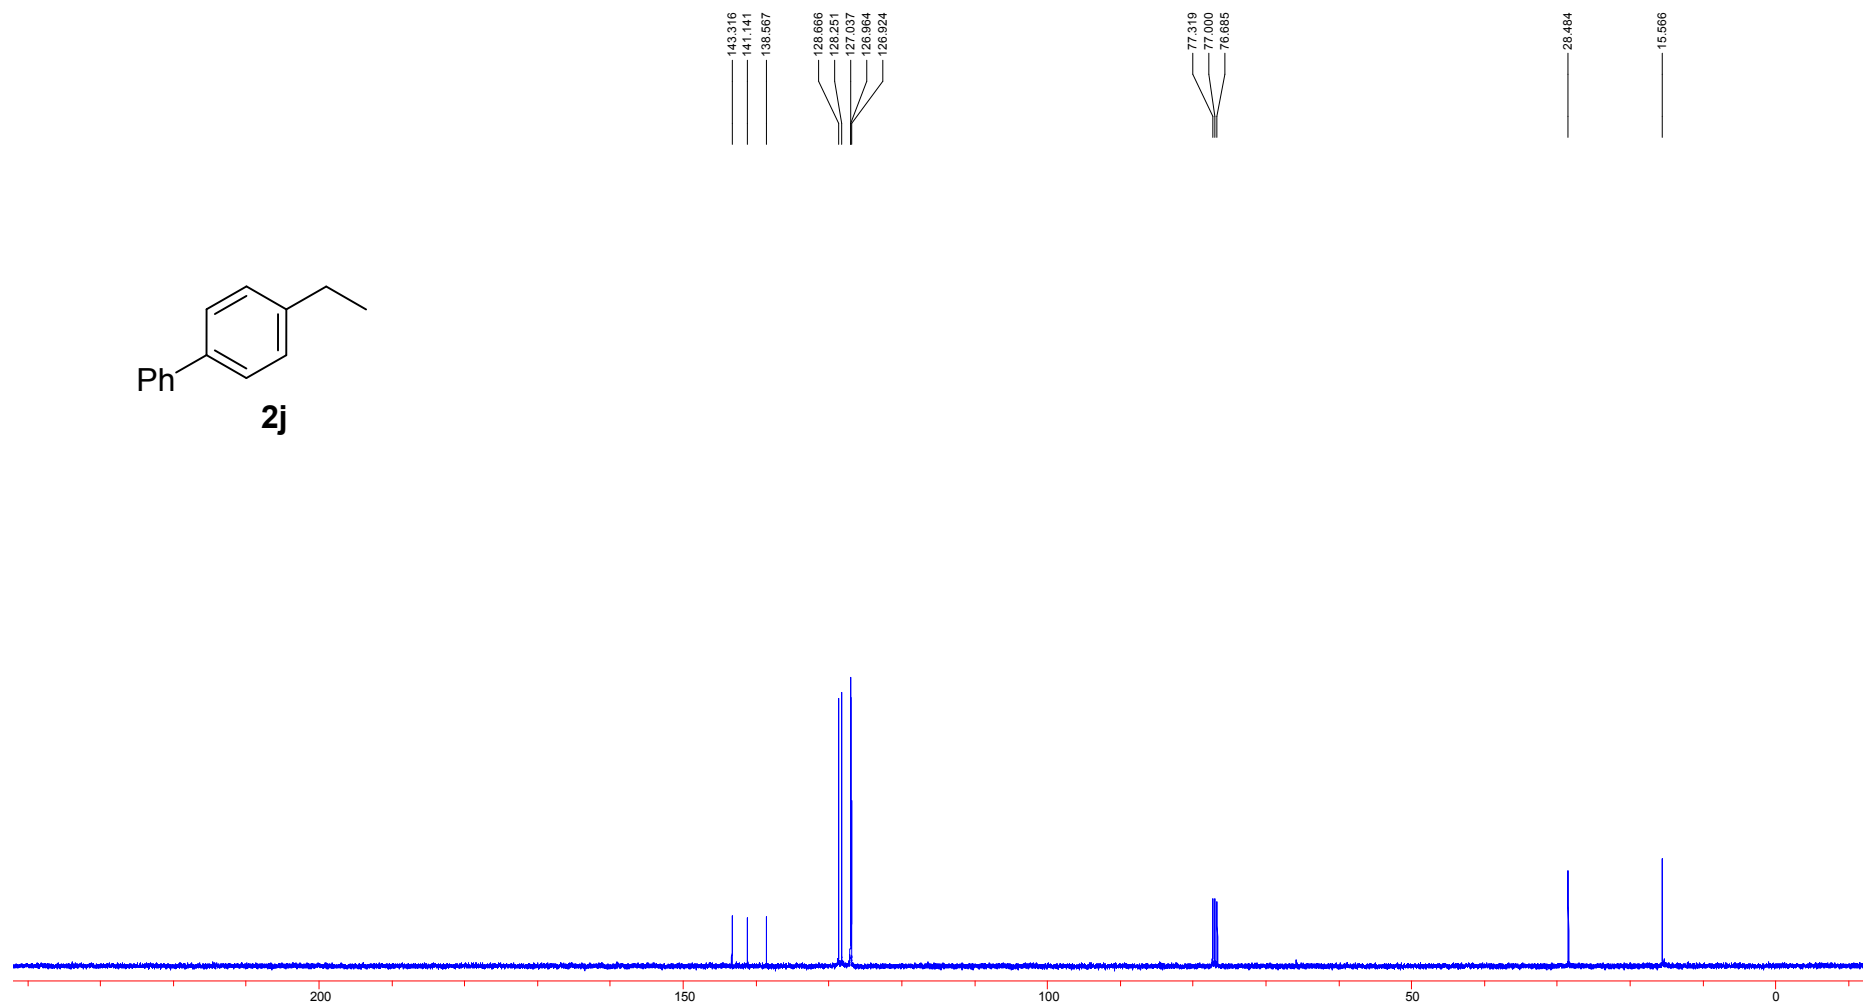

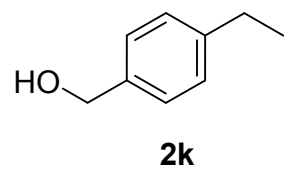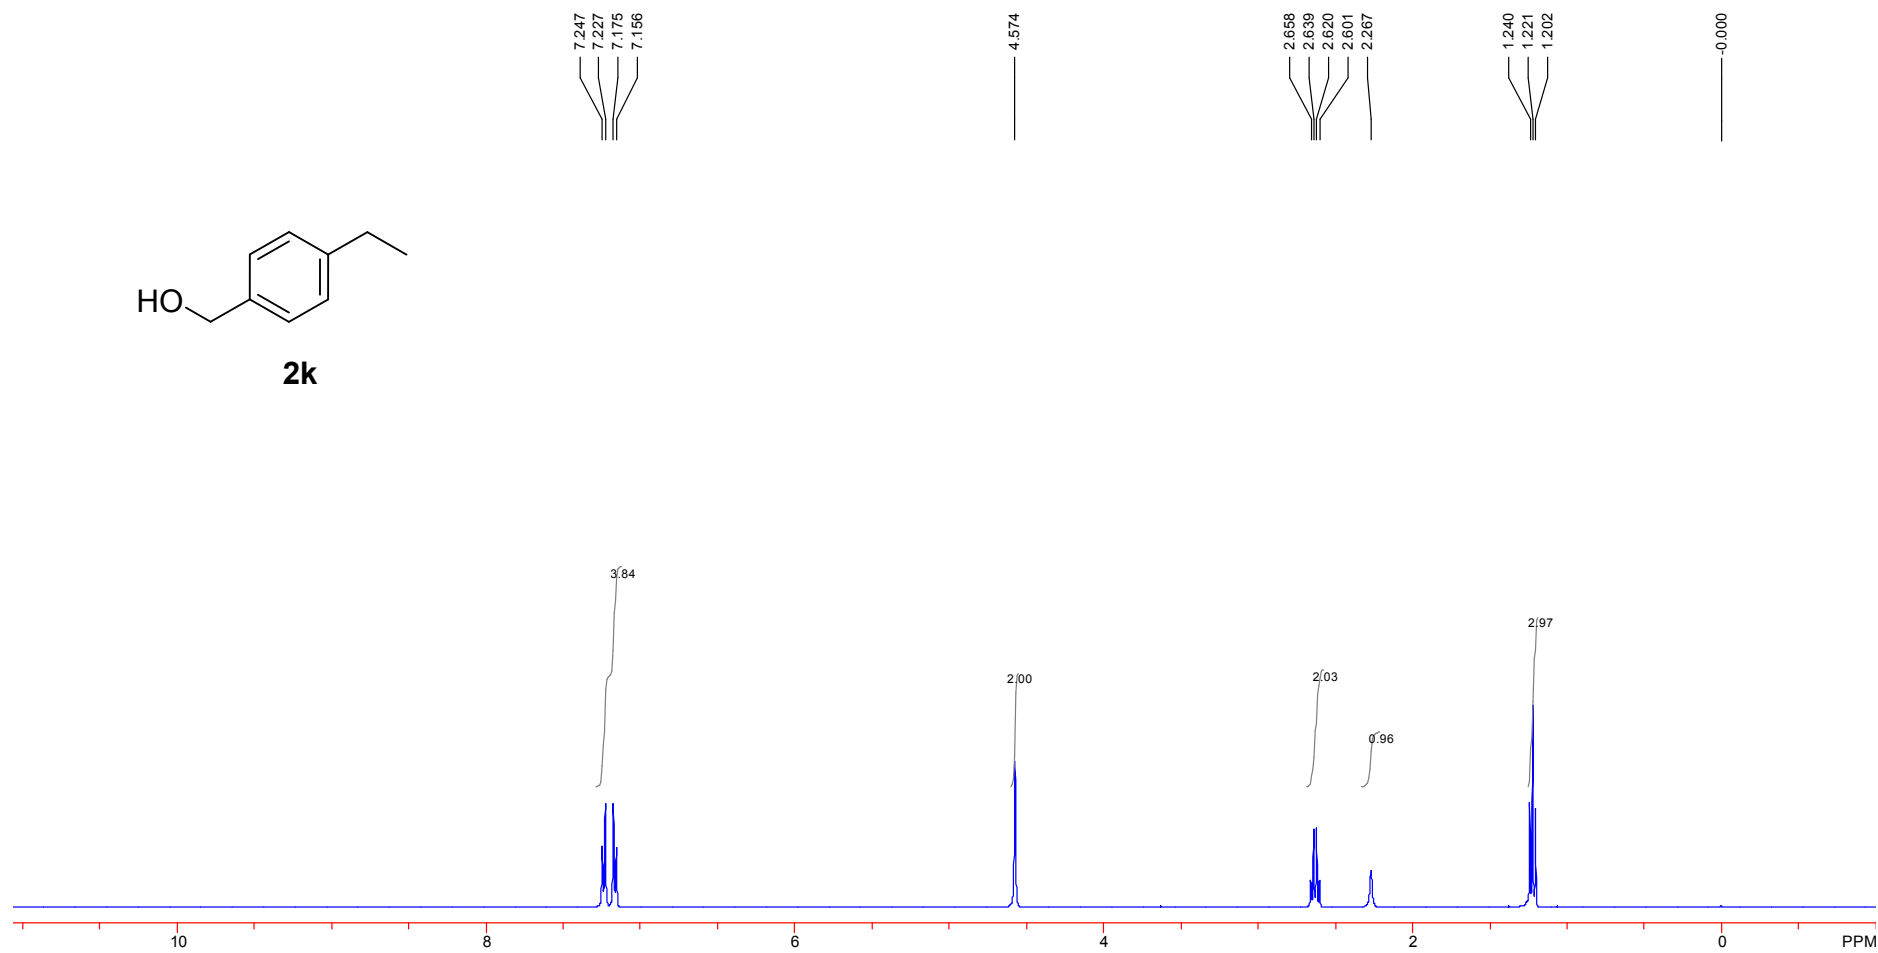

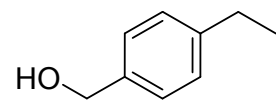

**2k**

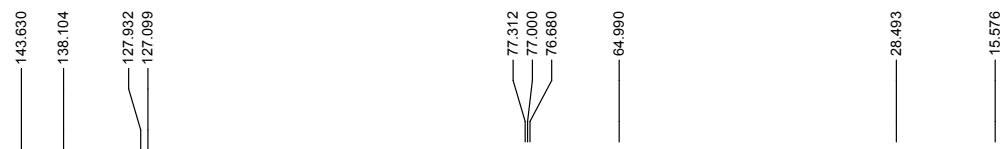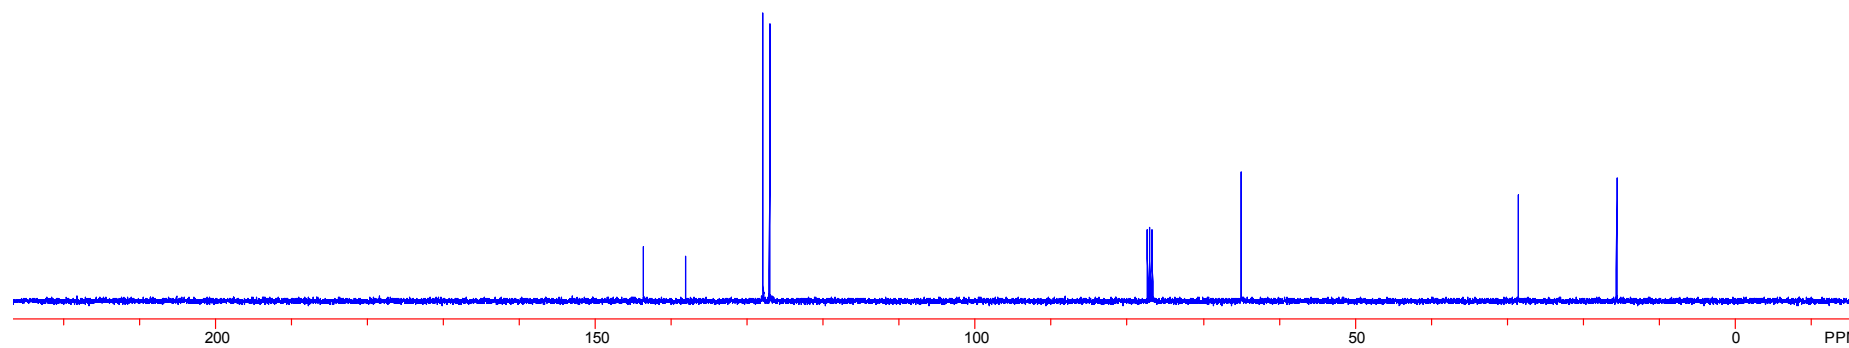

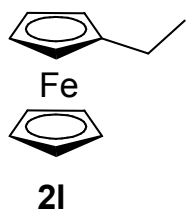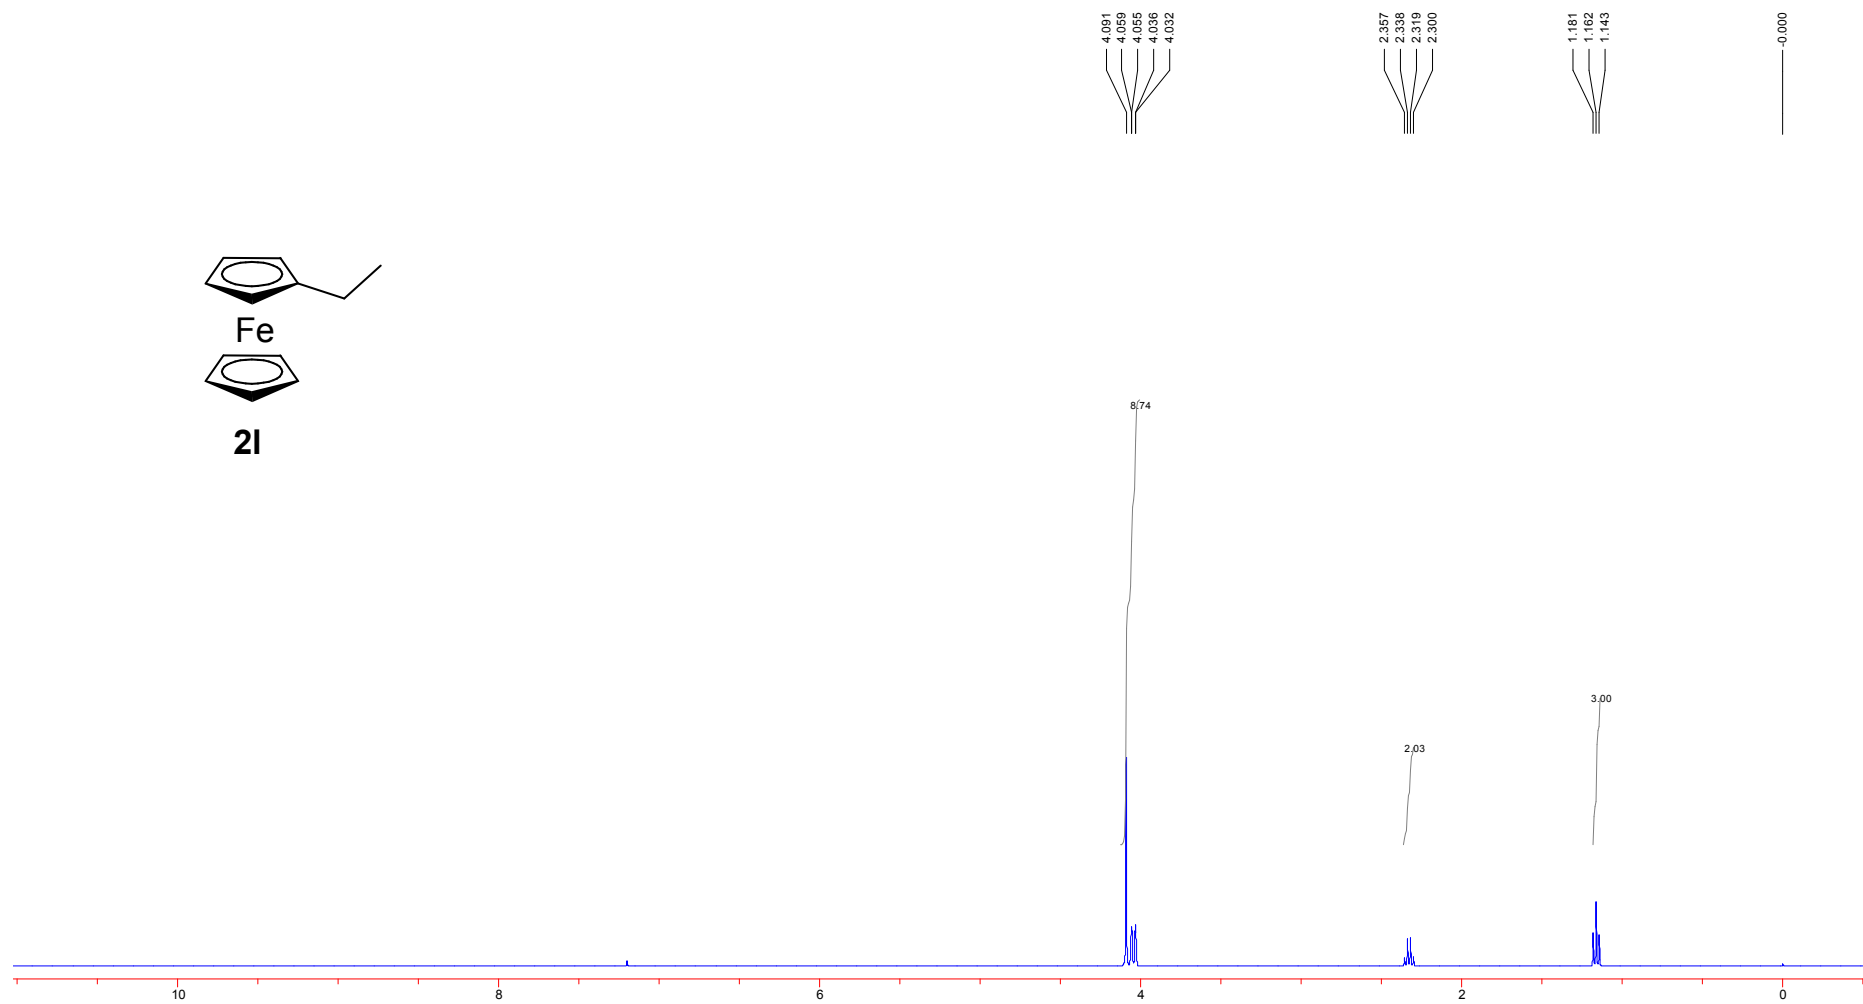

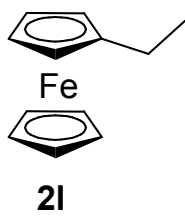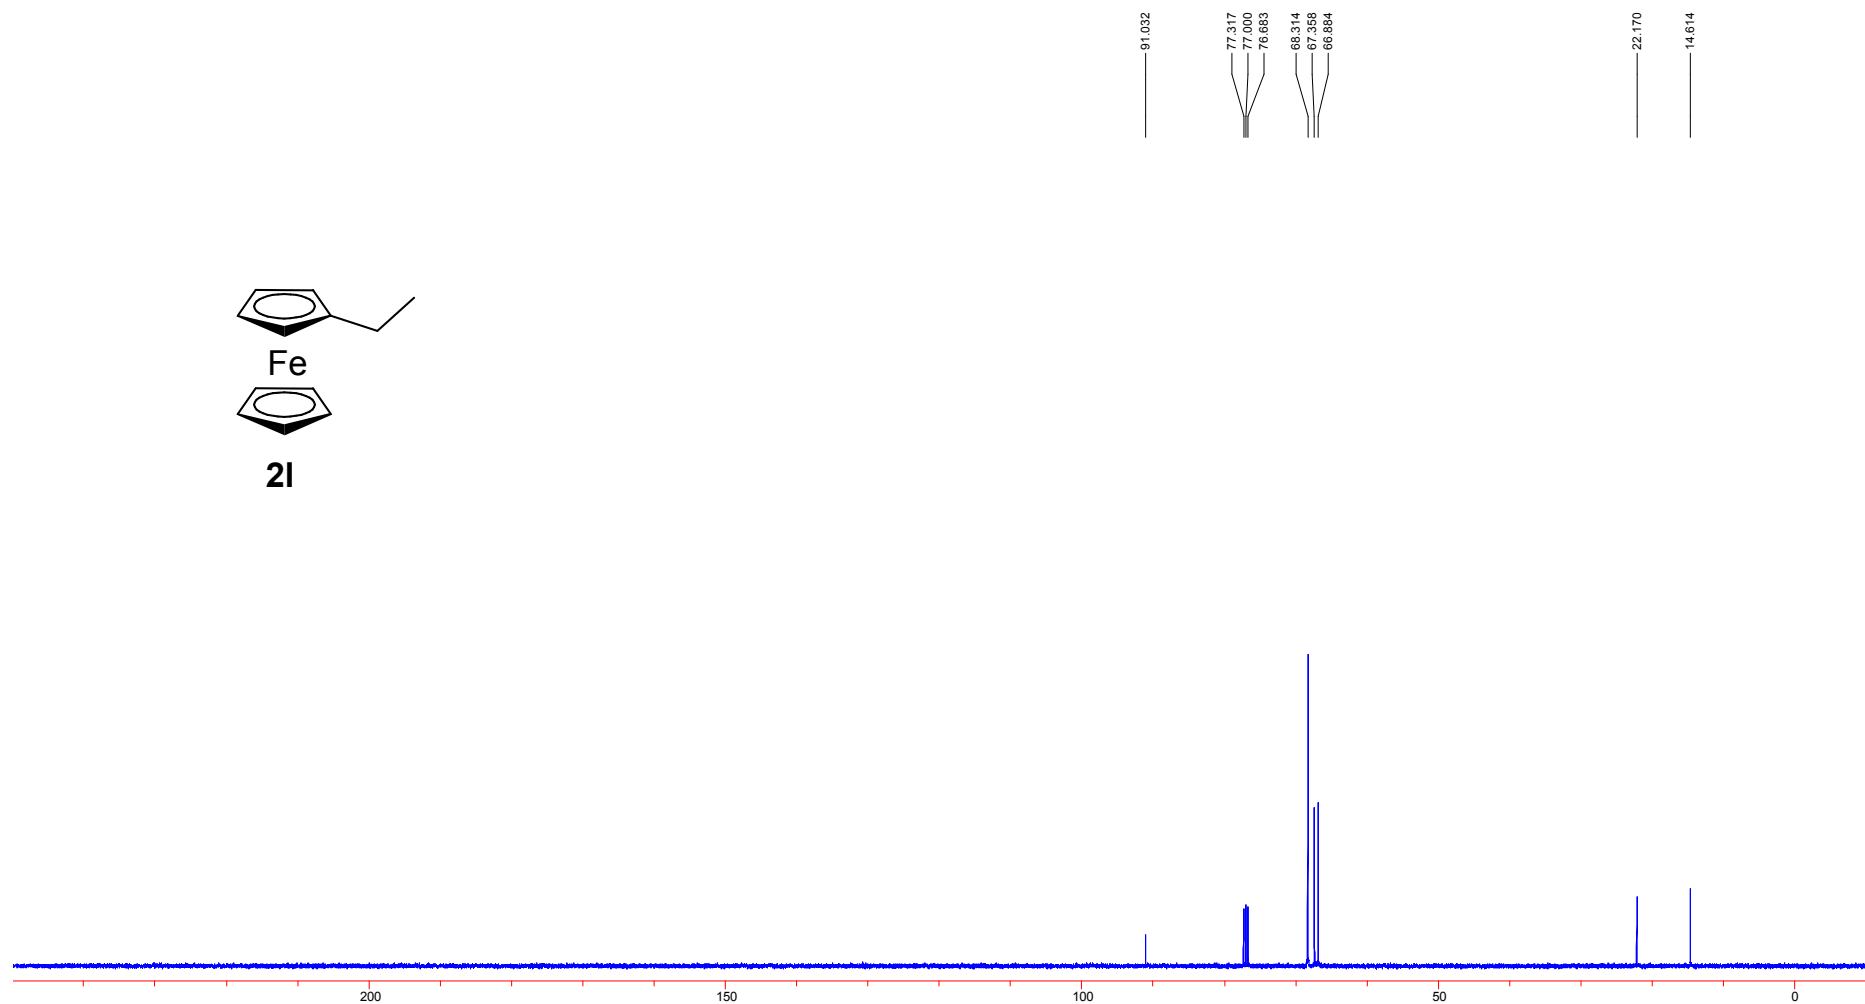

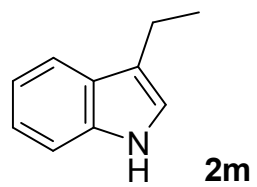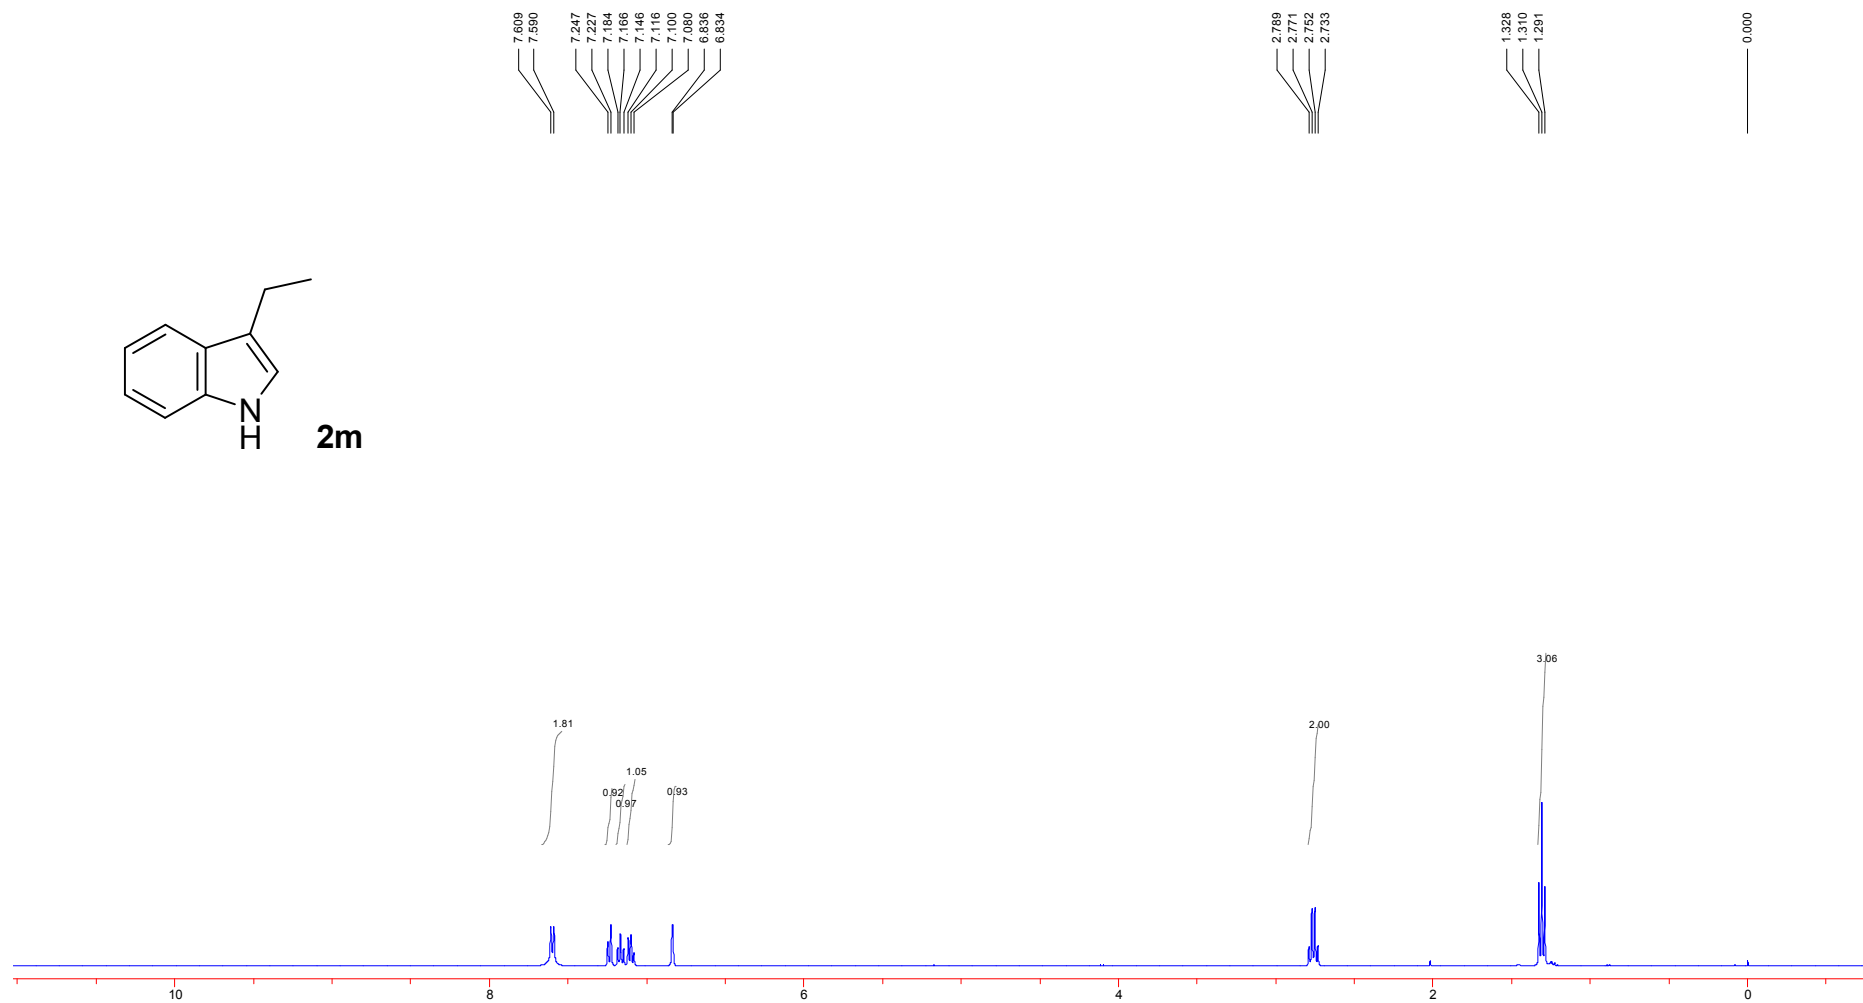

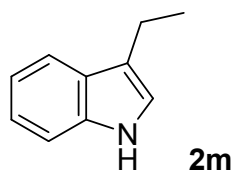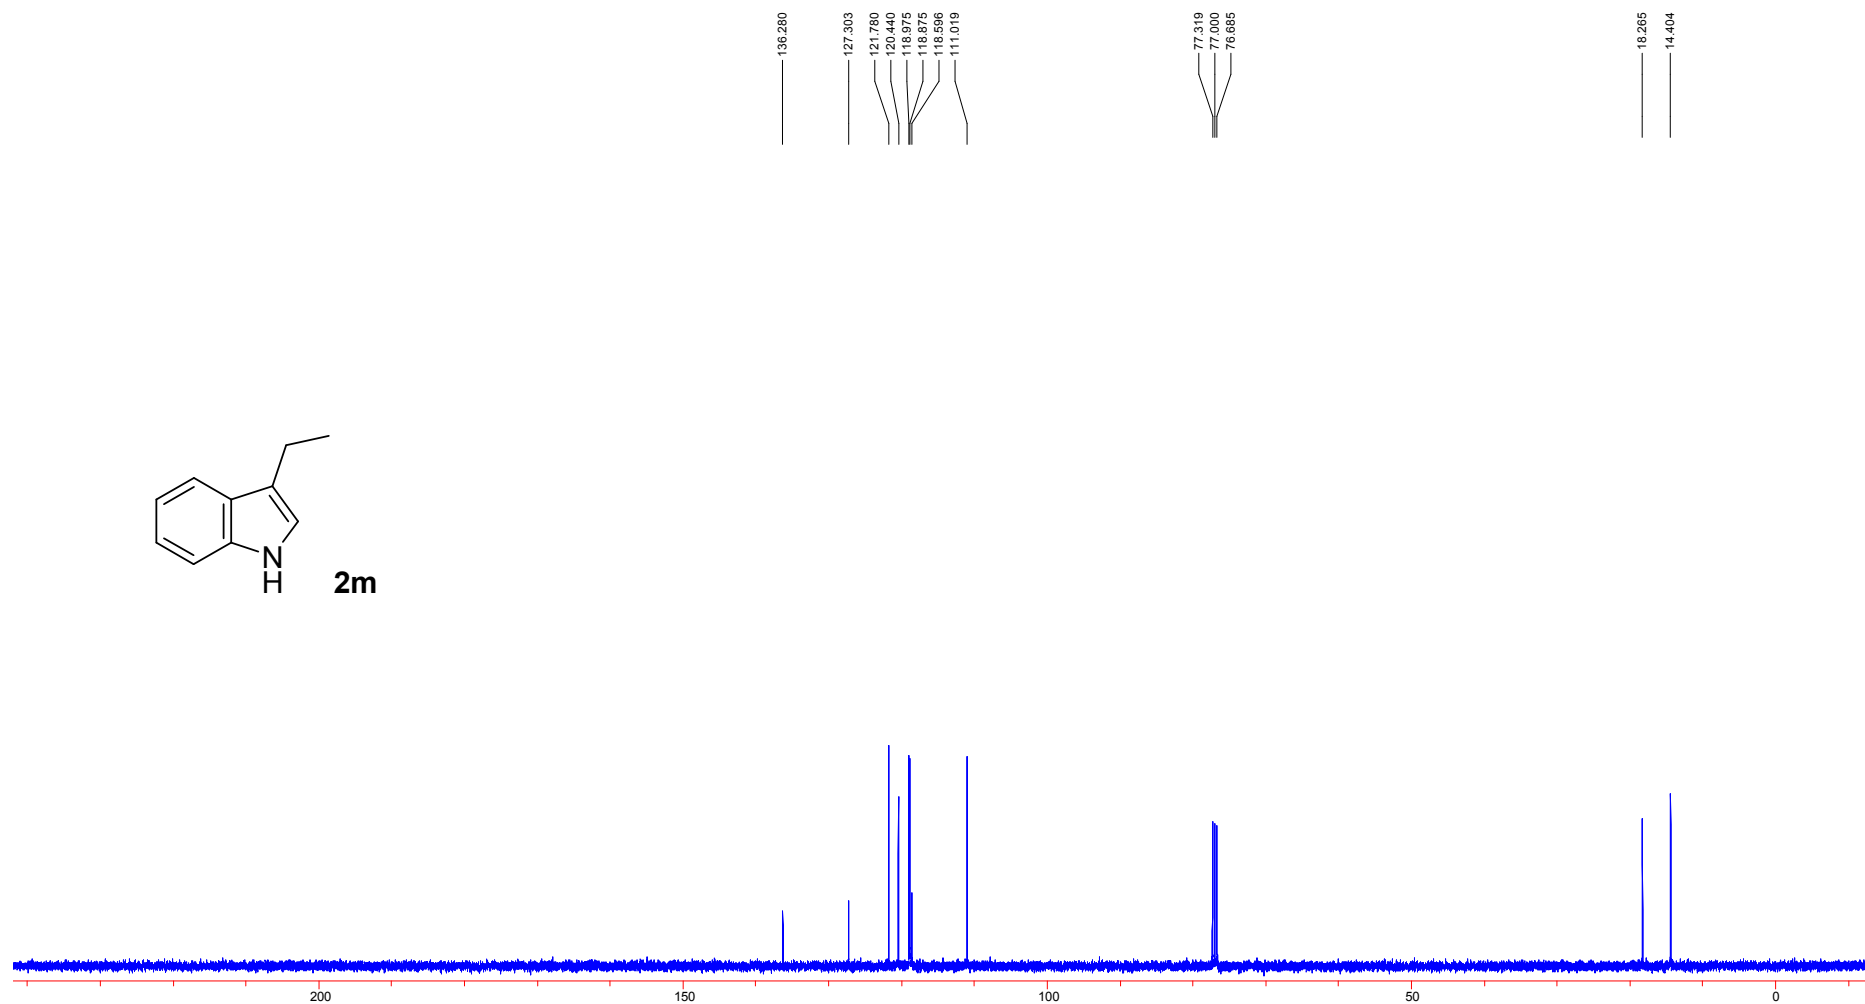

Due to the volatile nature of this compound, not all the petroleum ether could be removed.

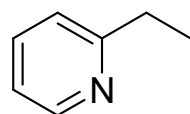

**2n**

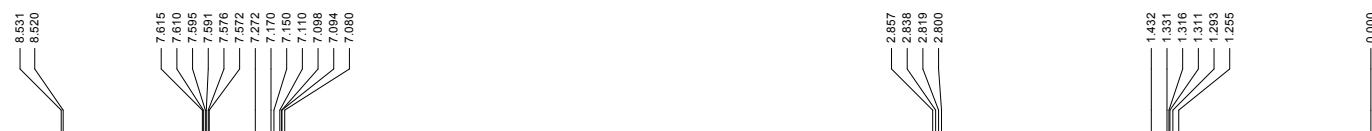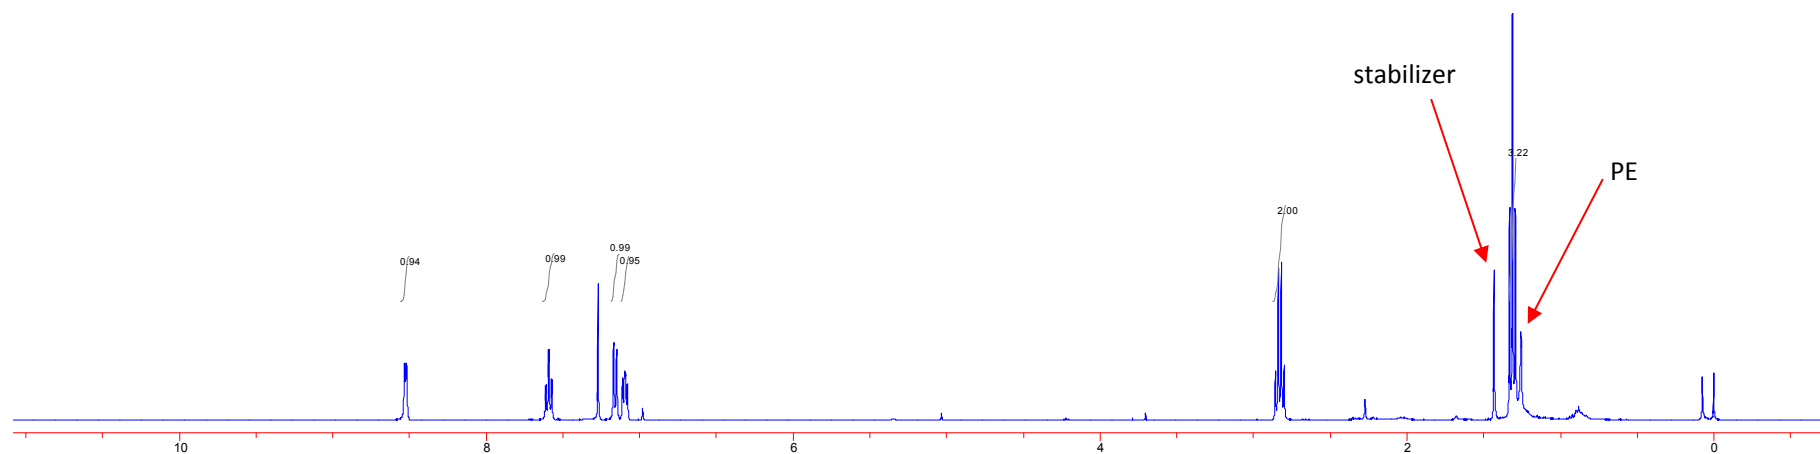

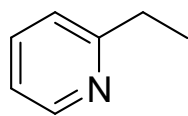

**2n**

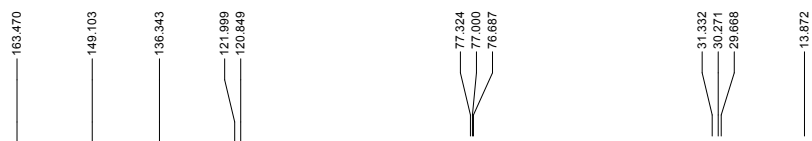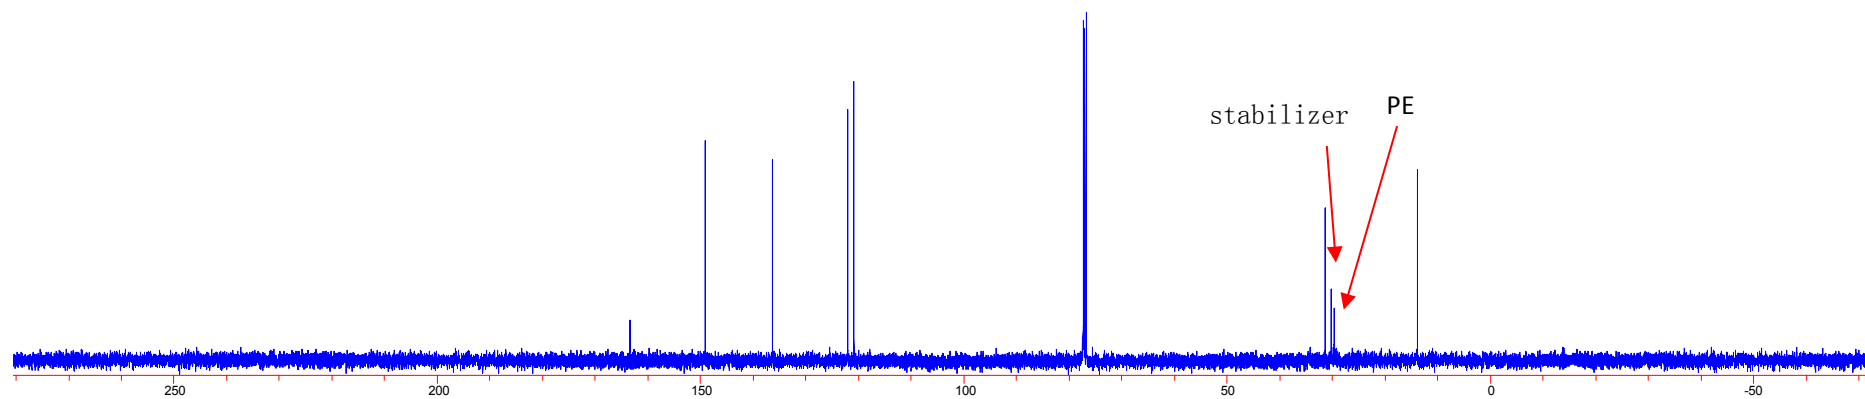

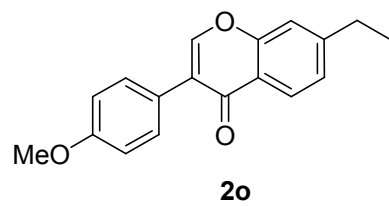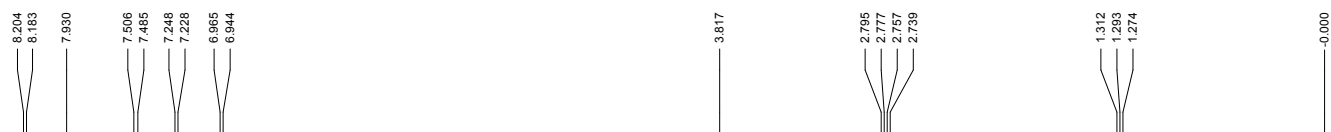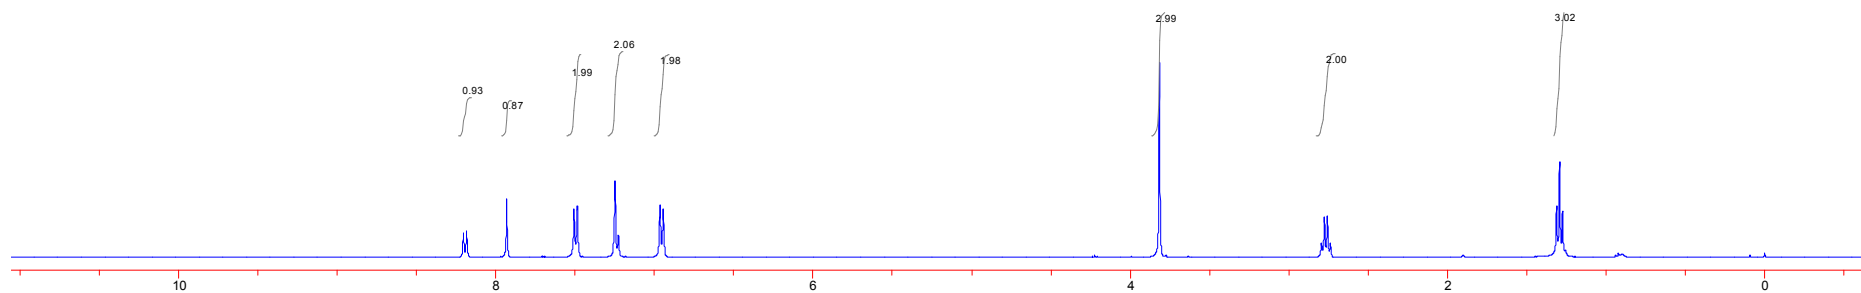

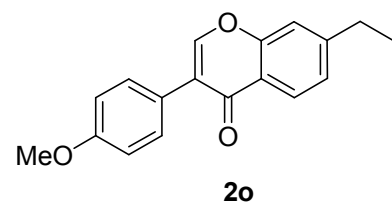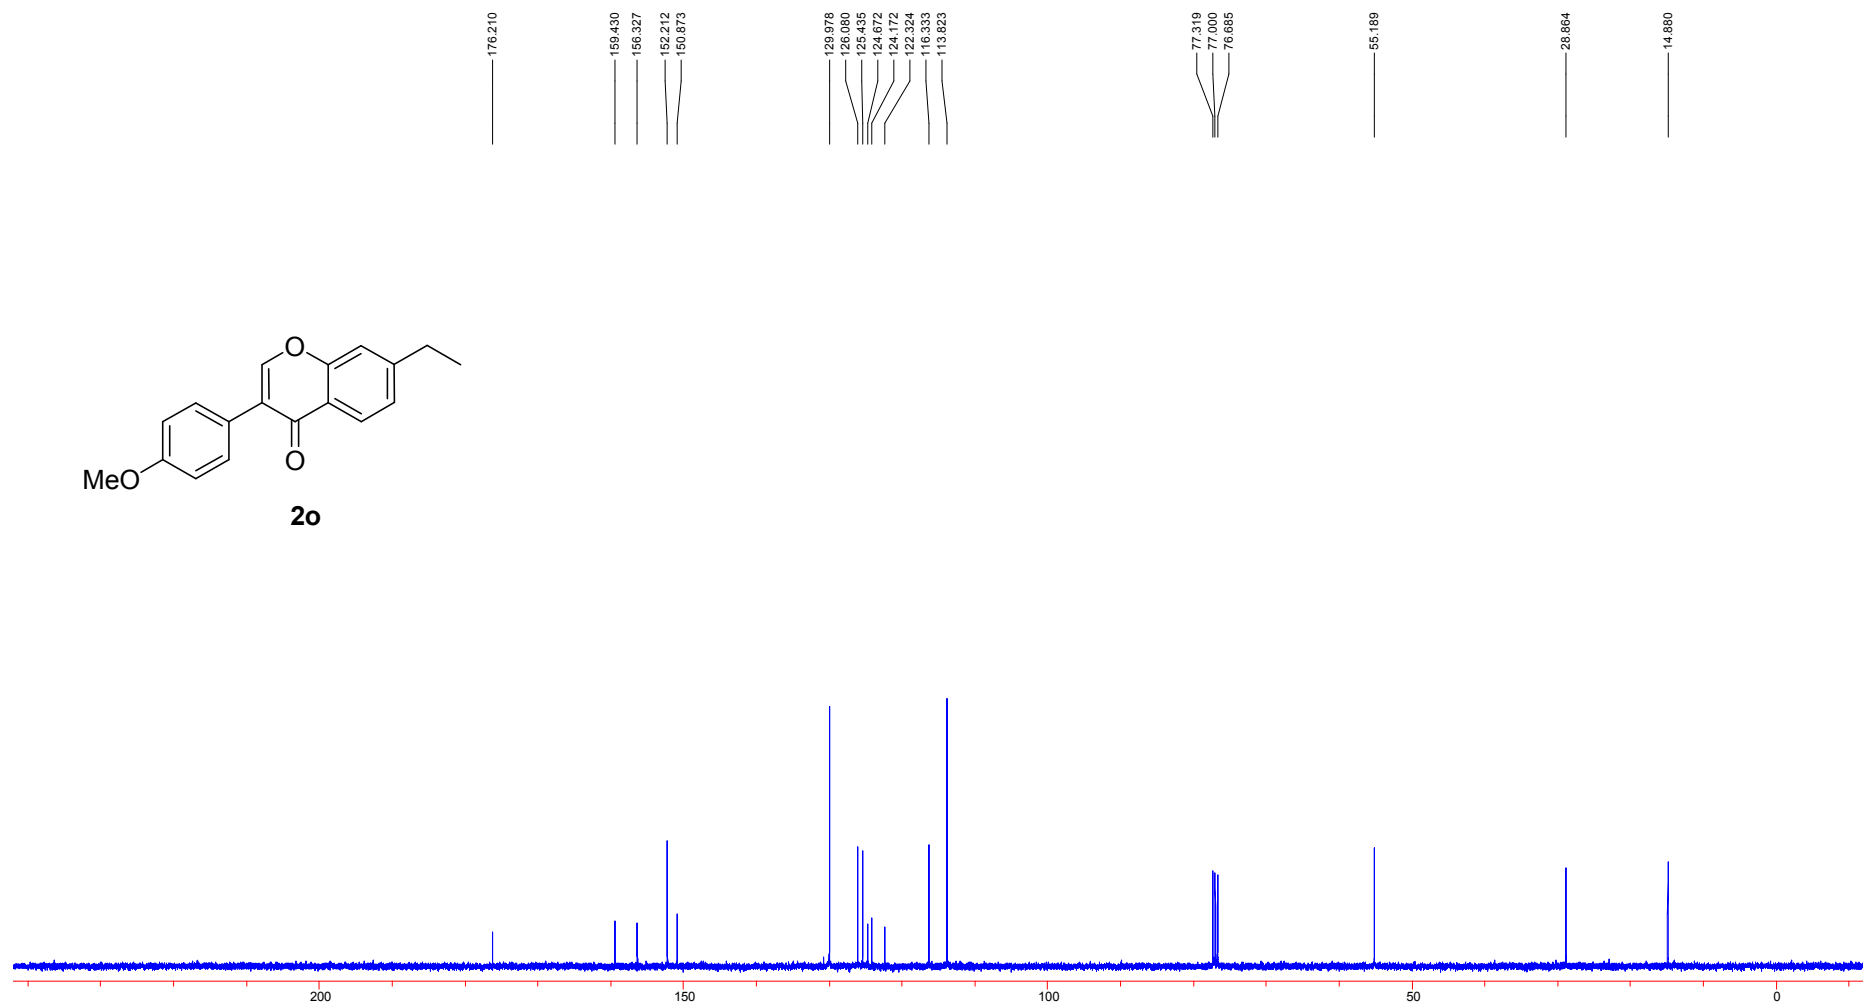

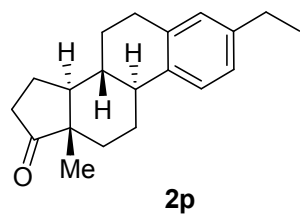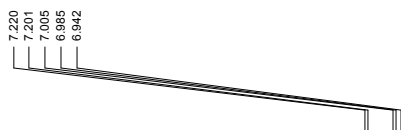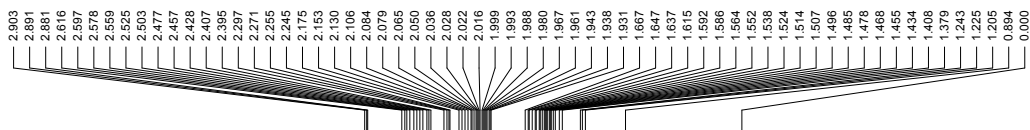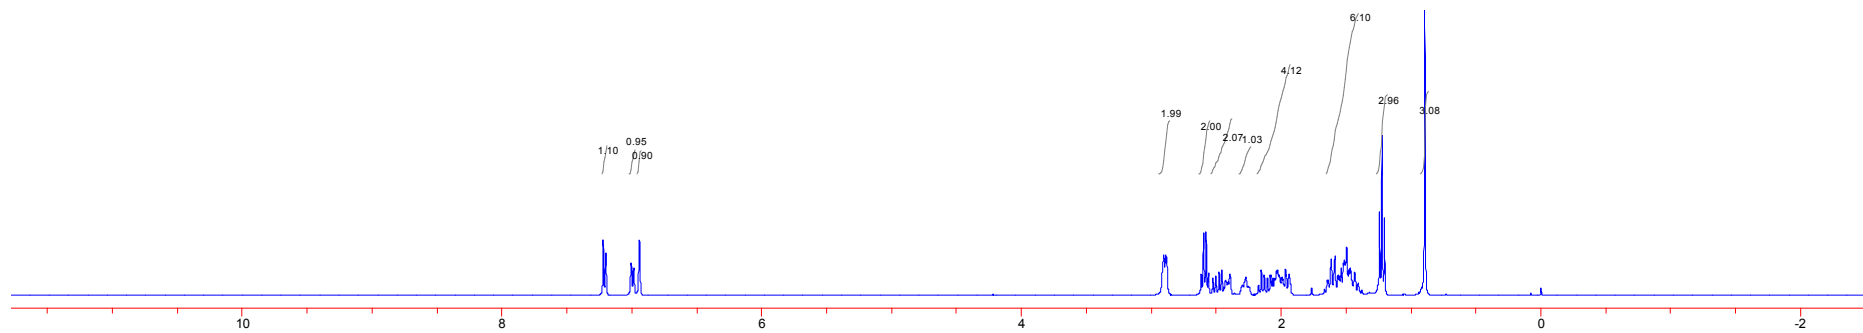

220.796

141.601

136.877

136.207

128.404

125.257

125.233

77.319

77.080

76.681

50.400

47.907

44.207

38.163

35.771

31.531

29.332

28.214

26.508

25.664

21.497

15.530

13.754

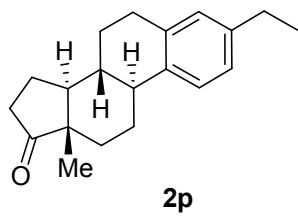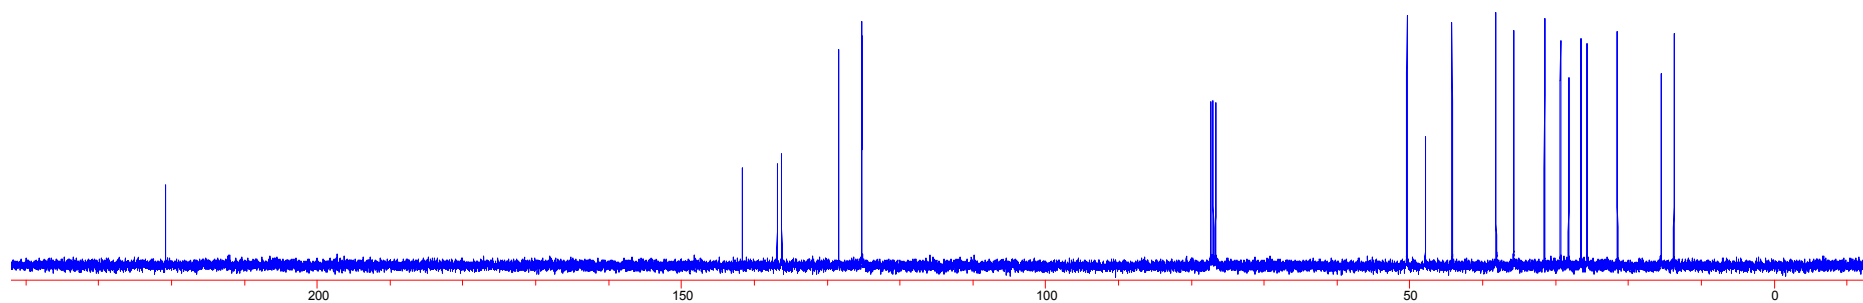

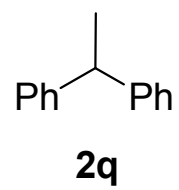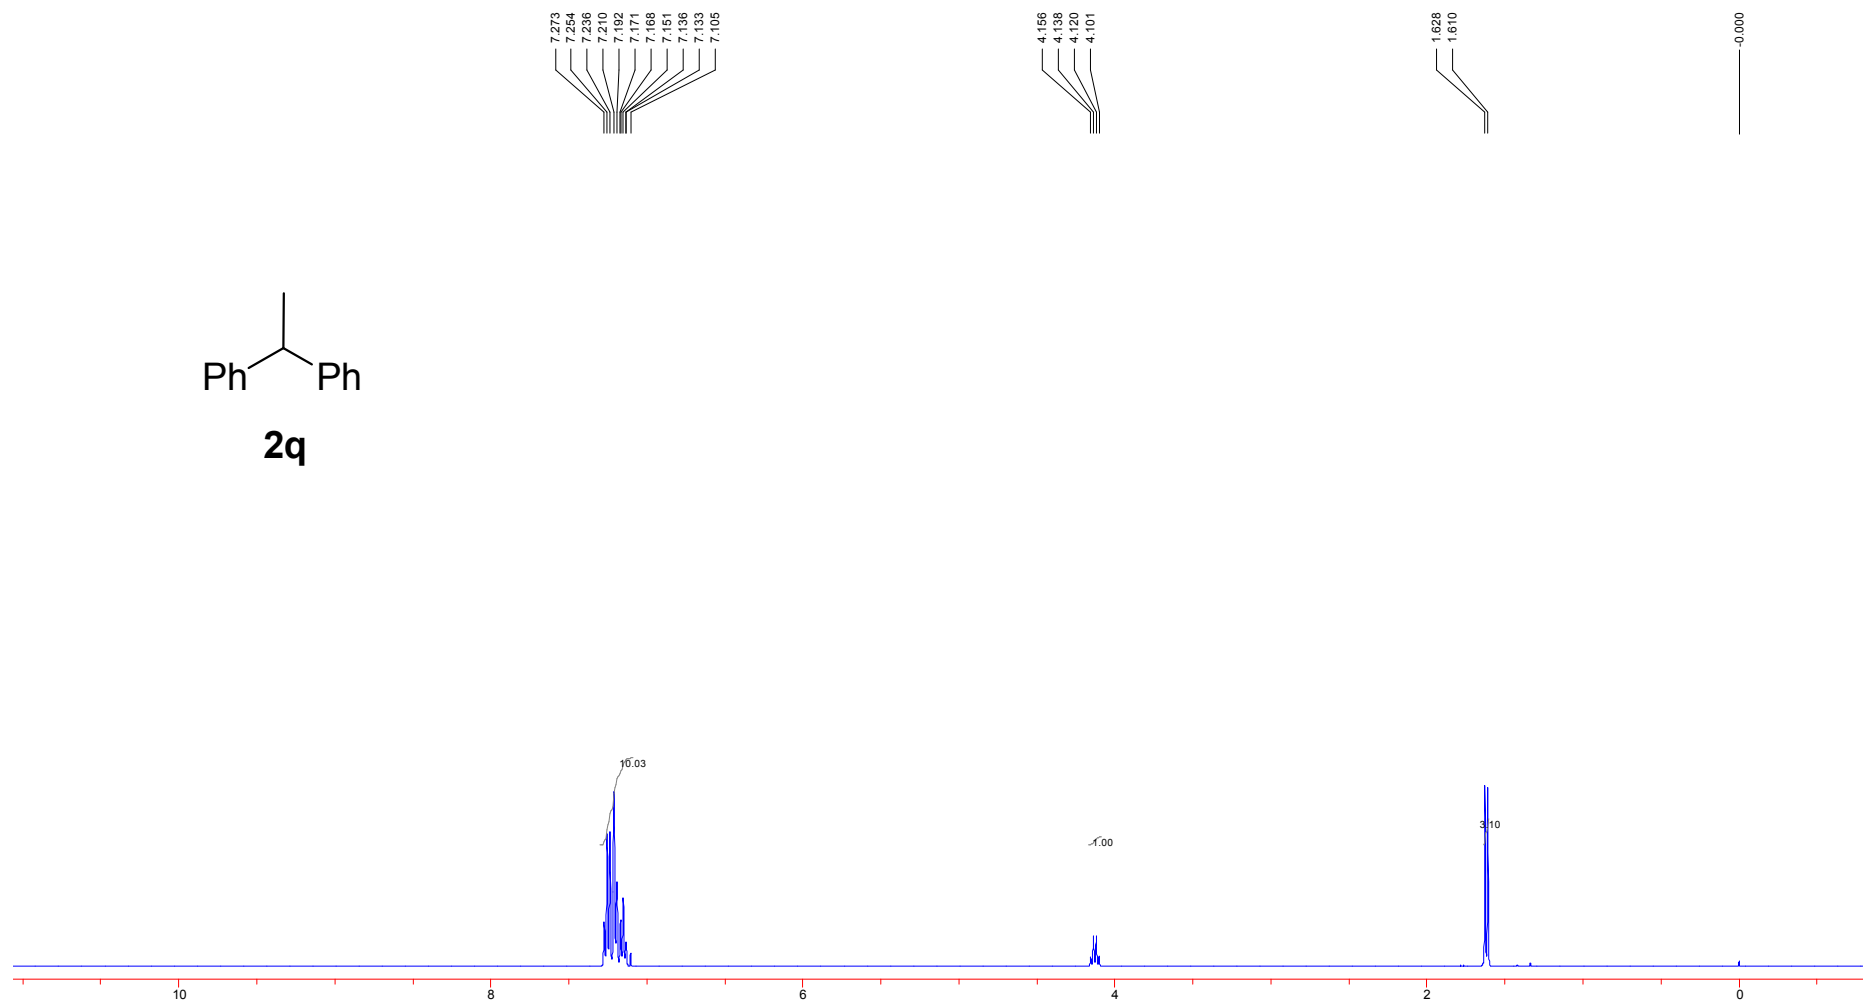

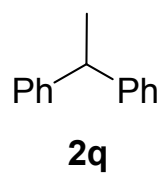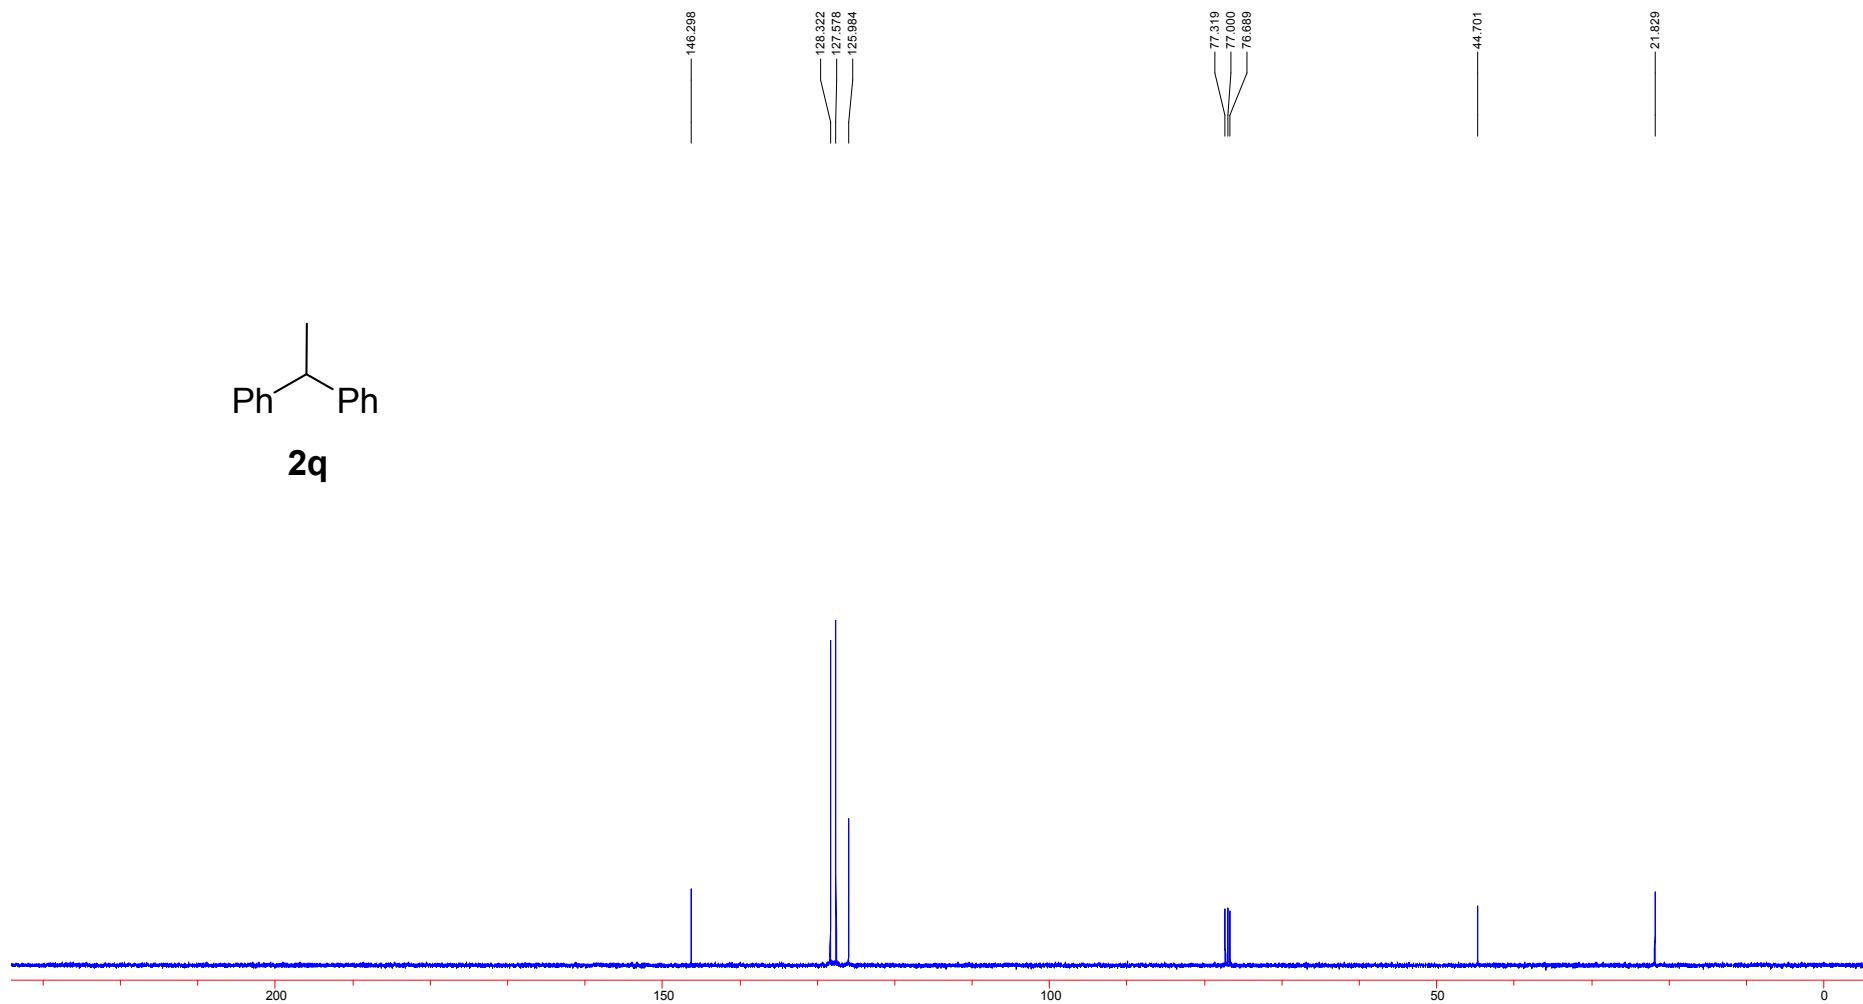

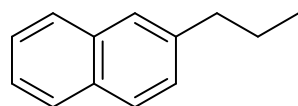

**2r**

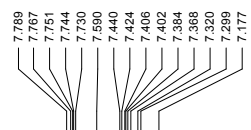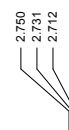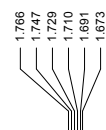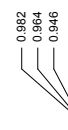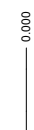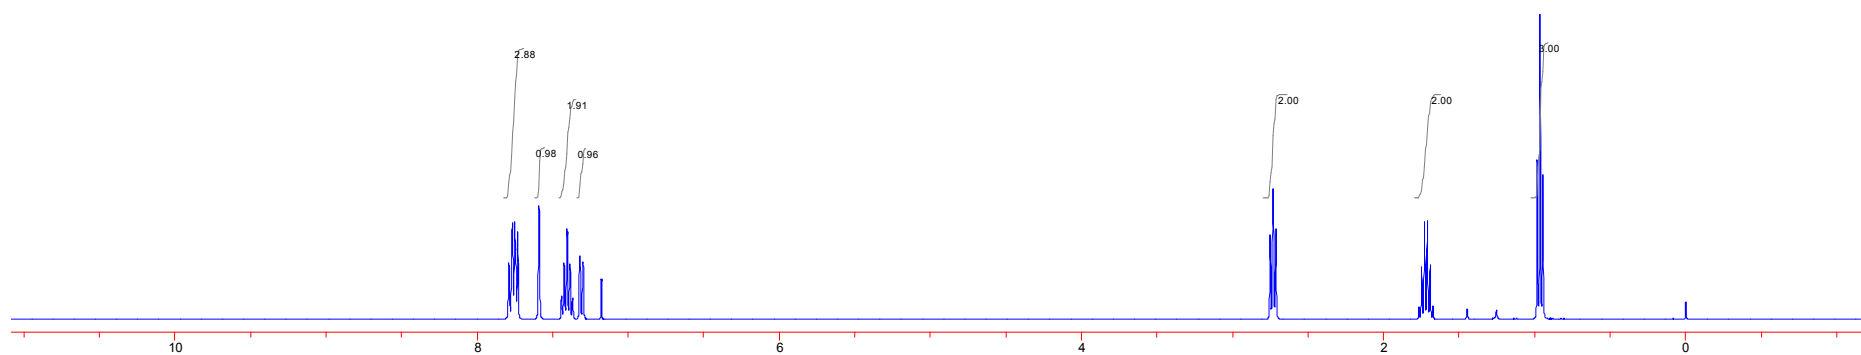

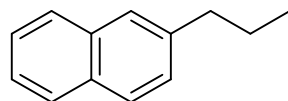

**2r**

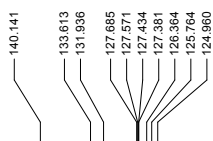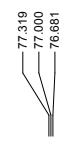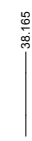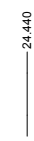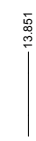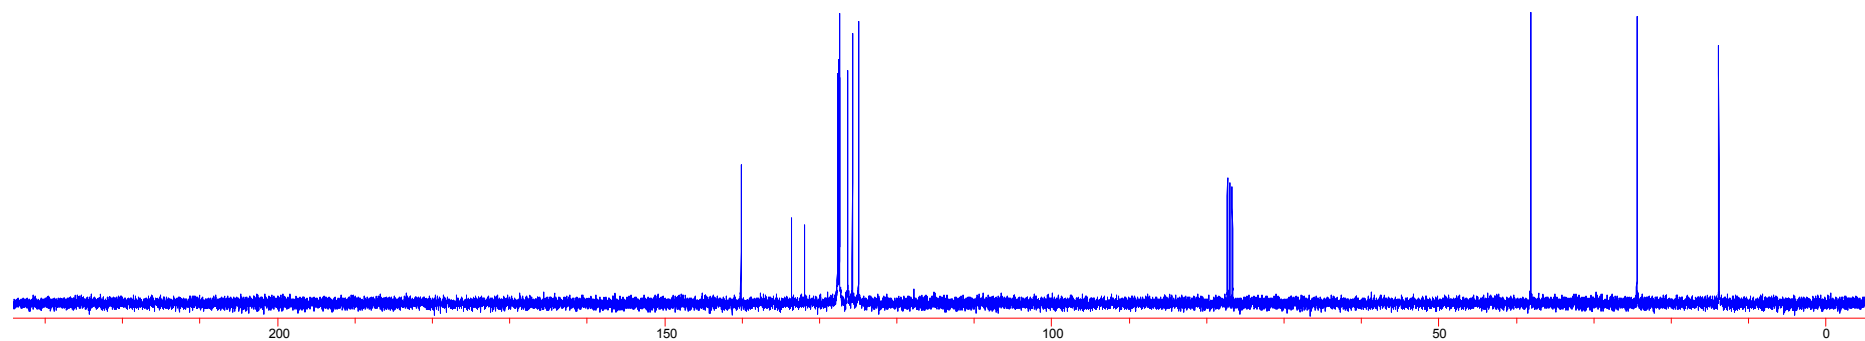

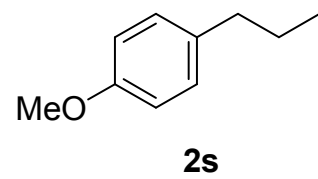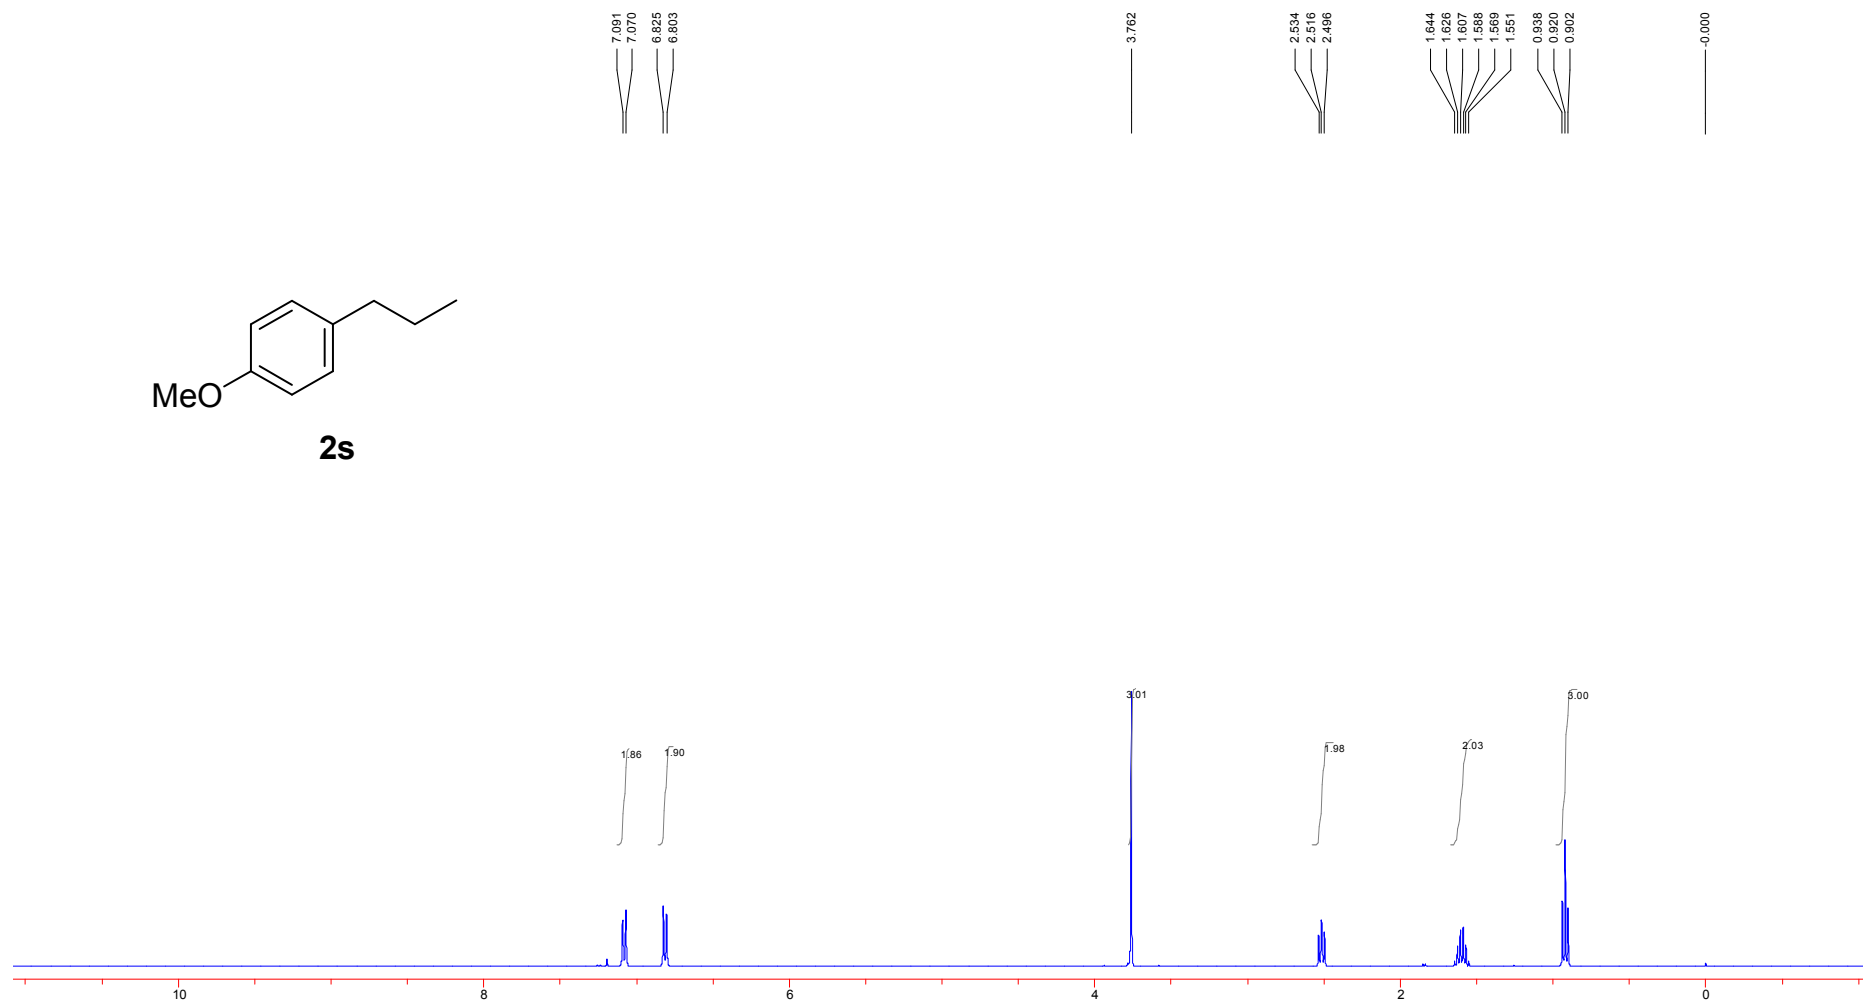

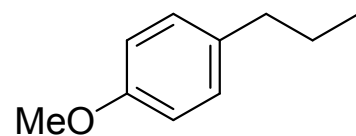

**2s**

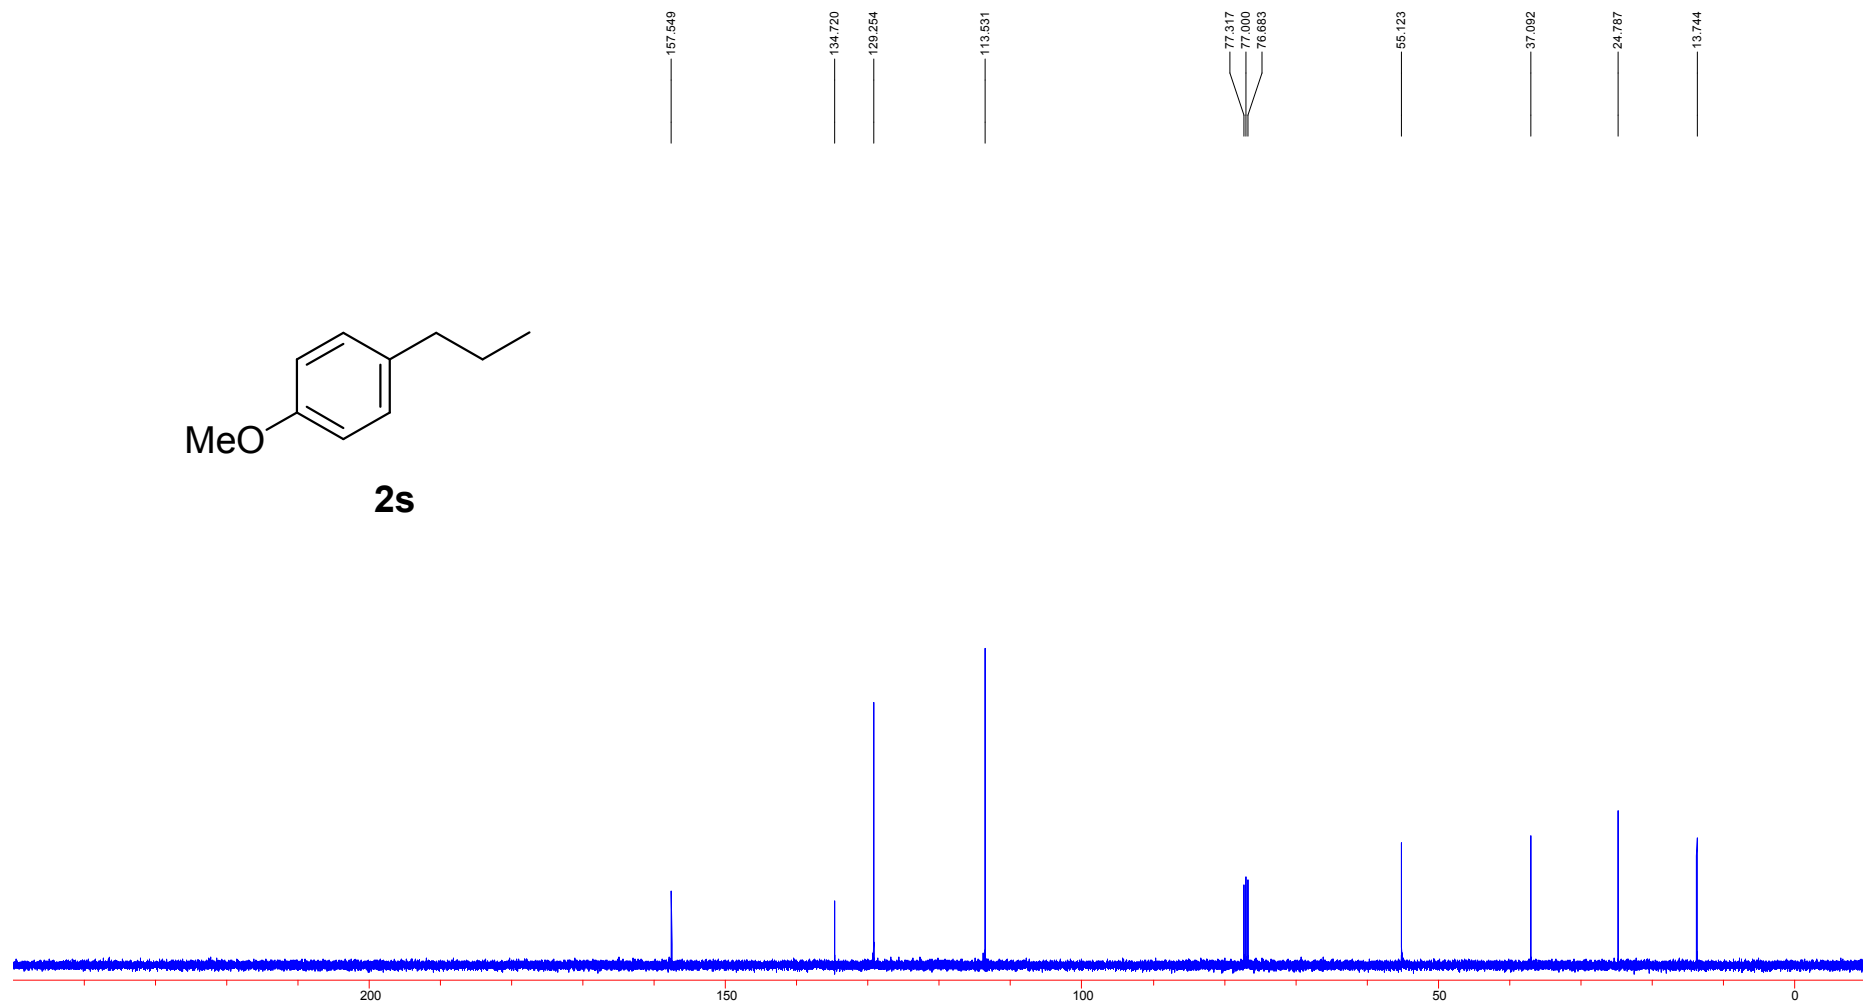

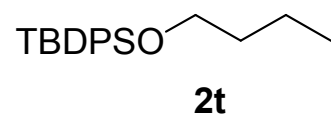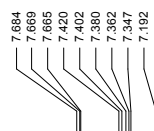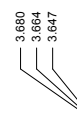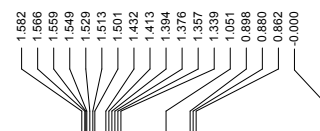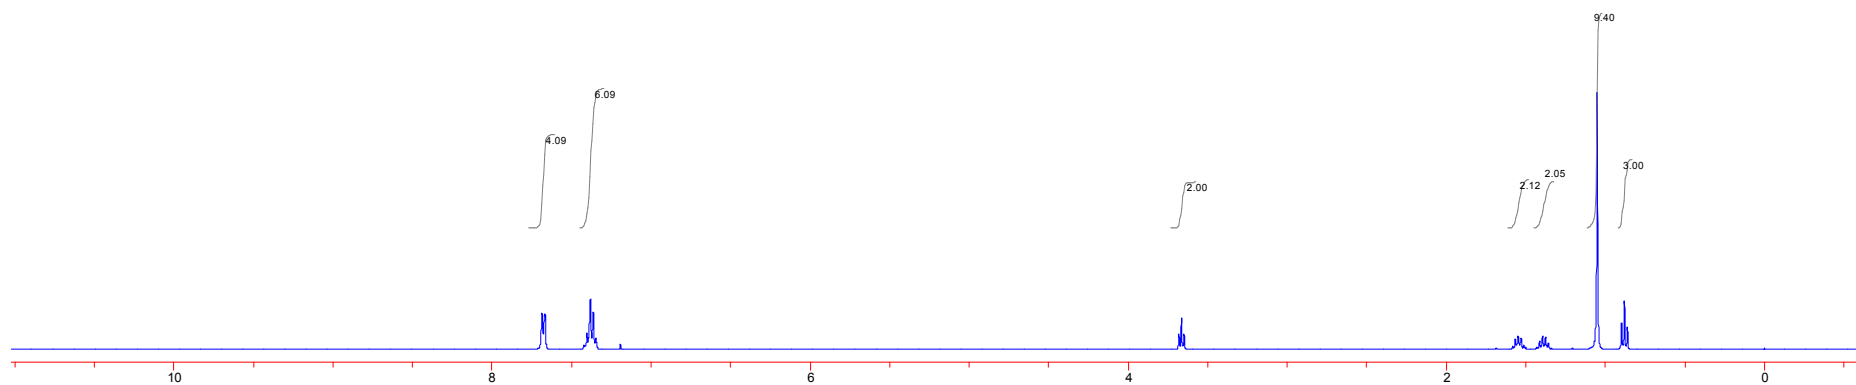

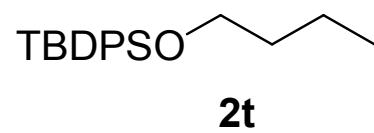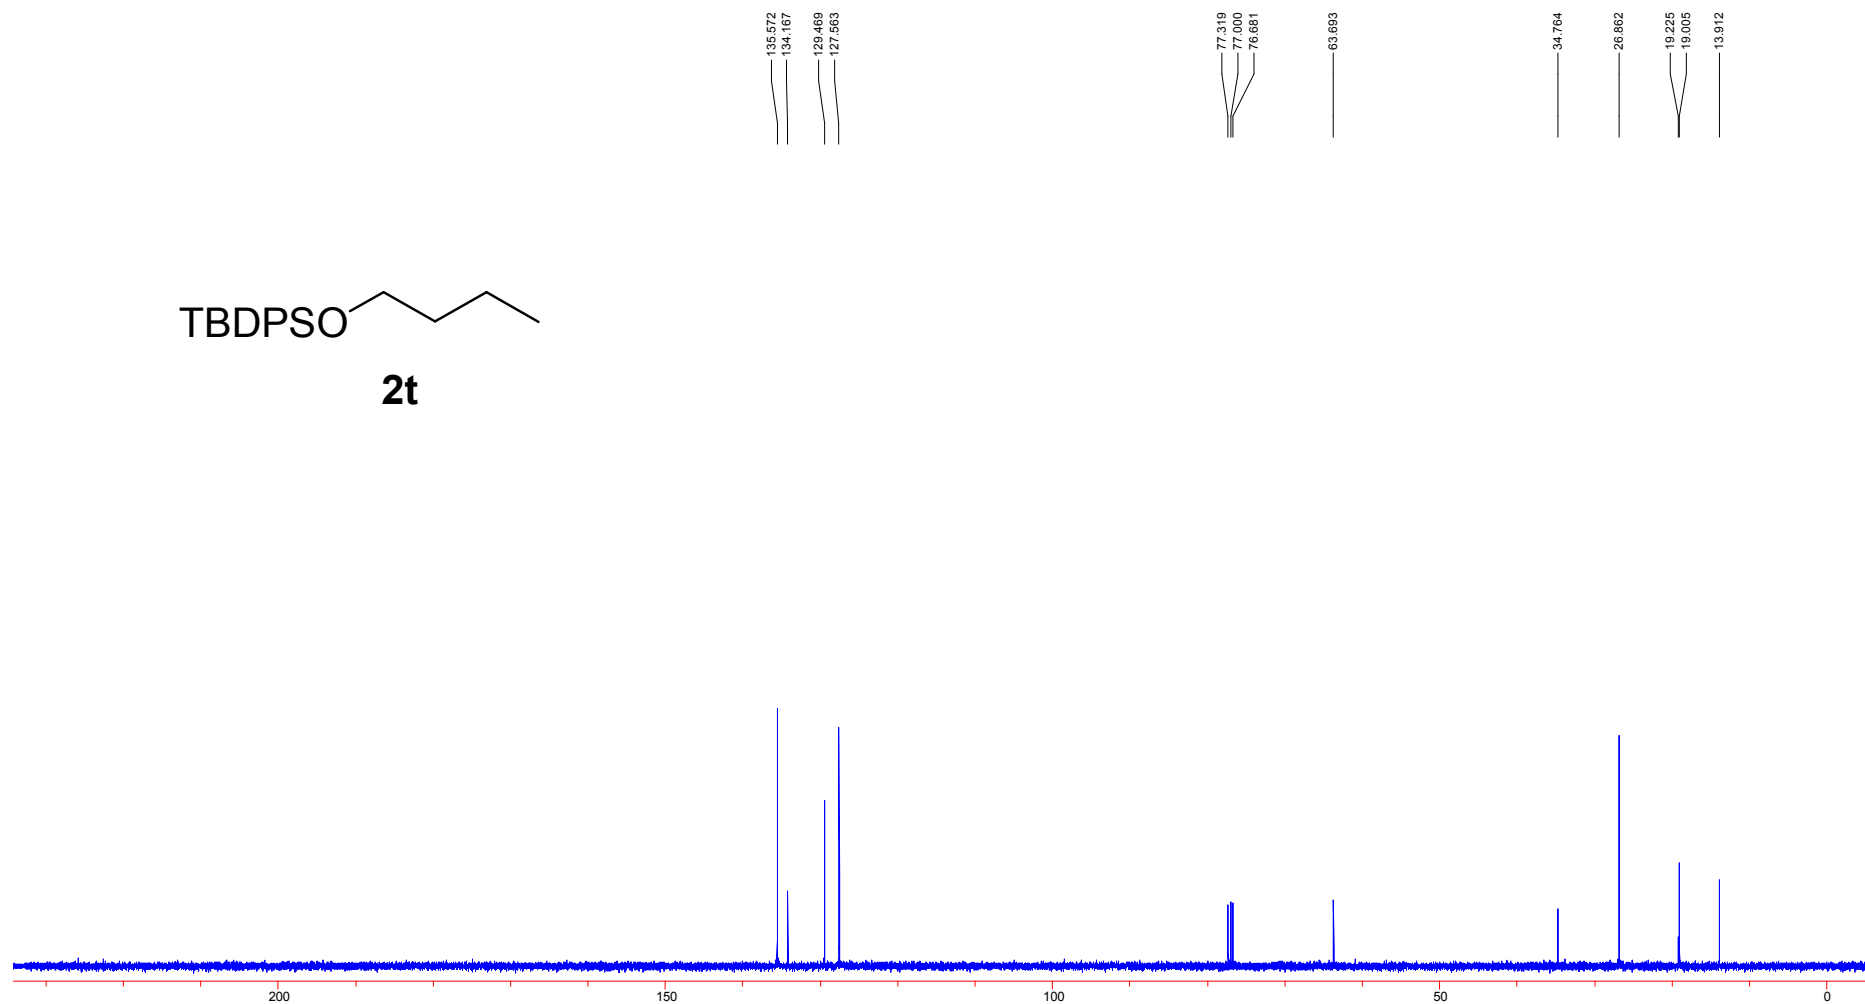

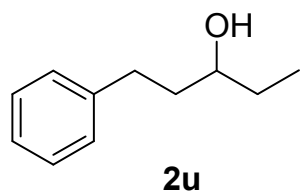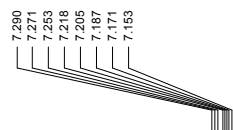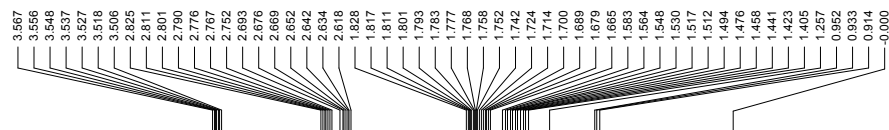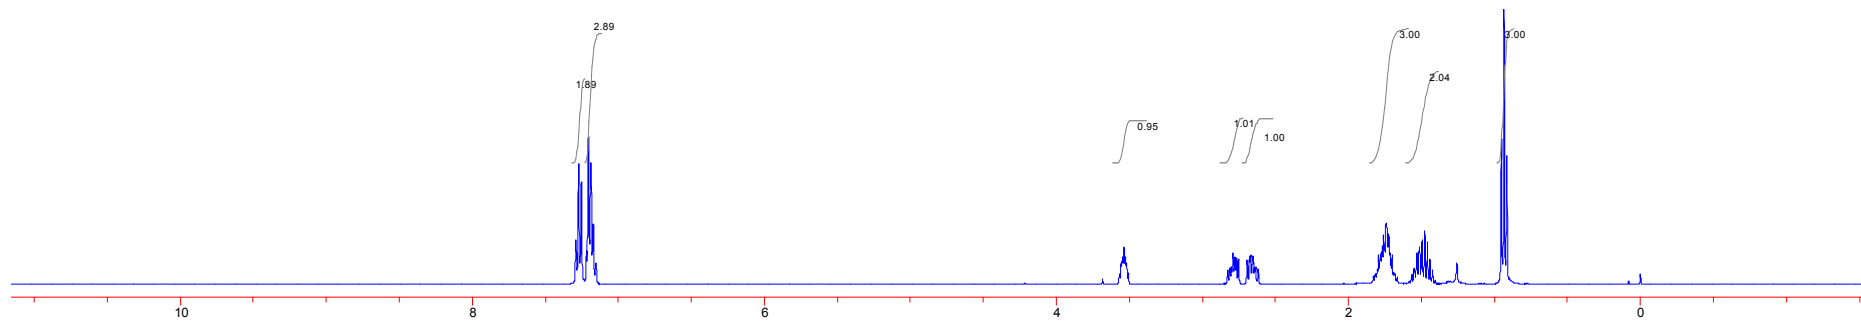

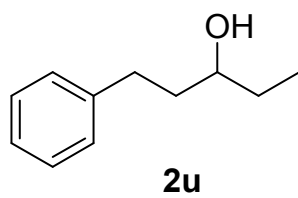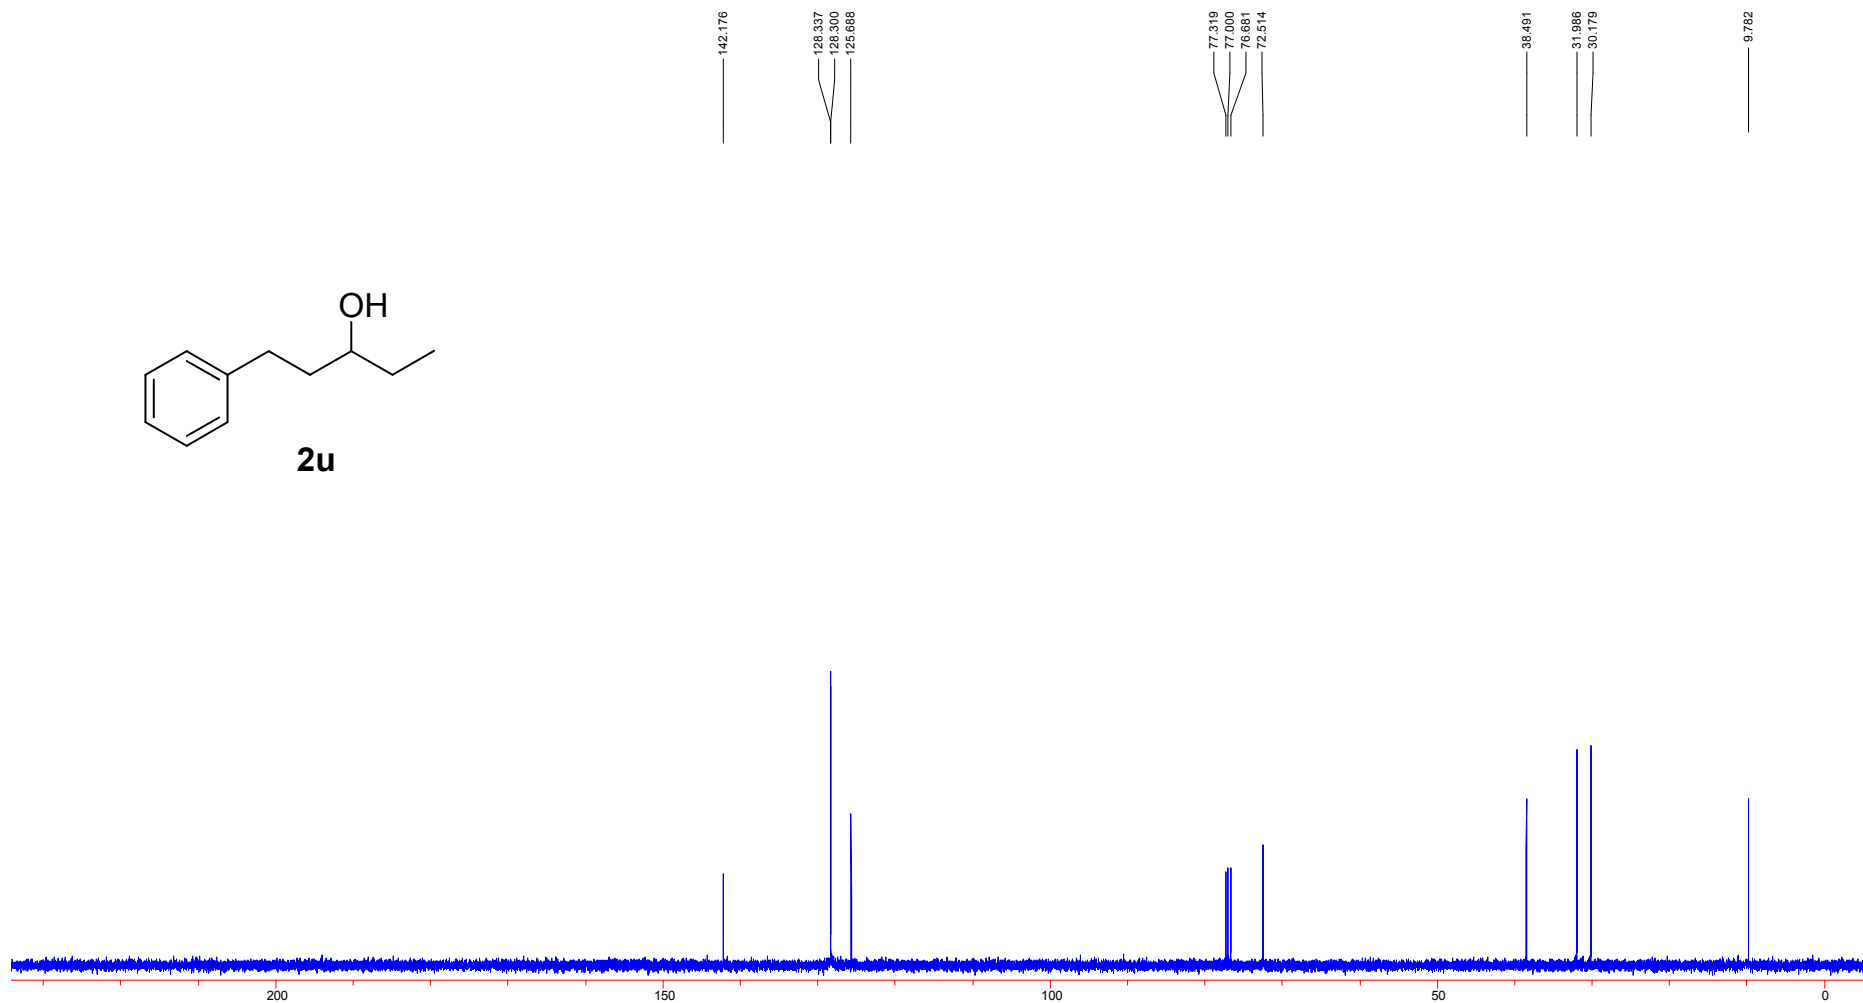

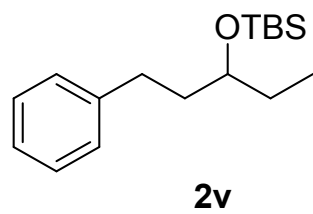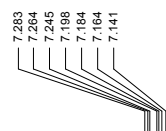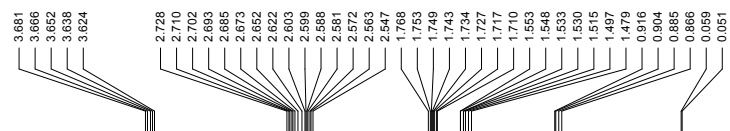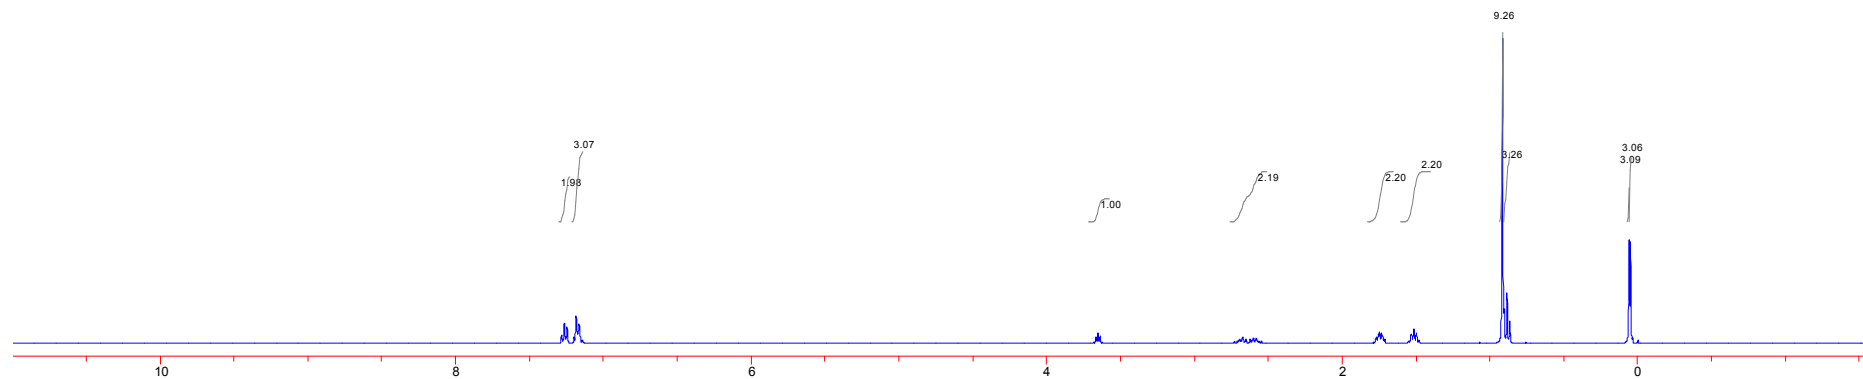

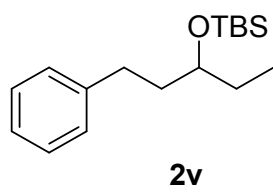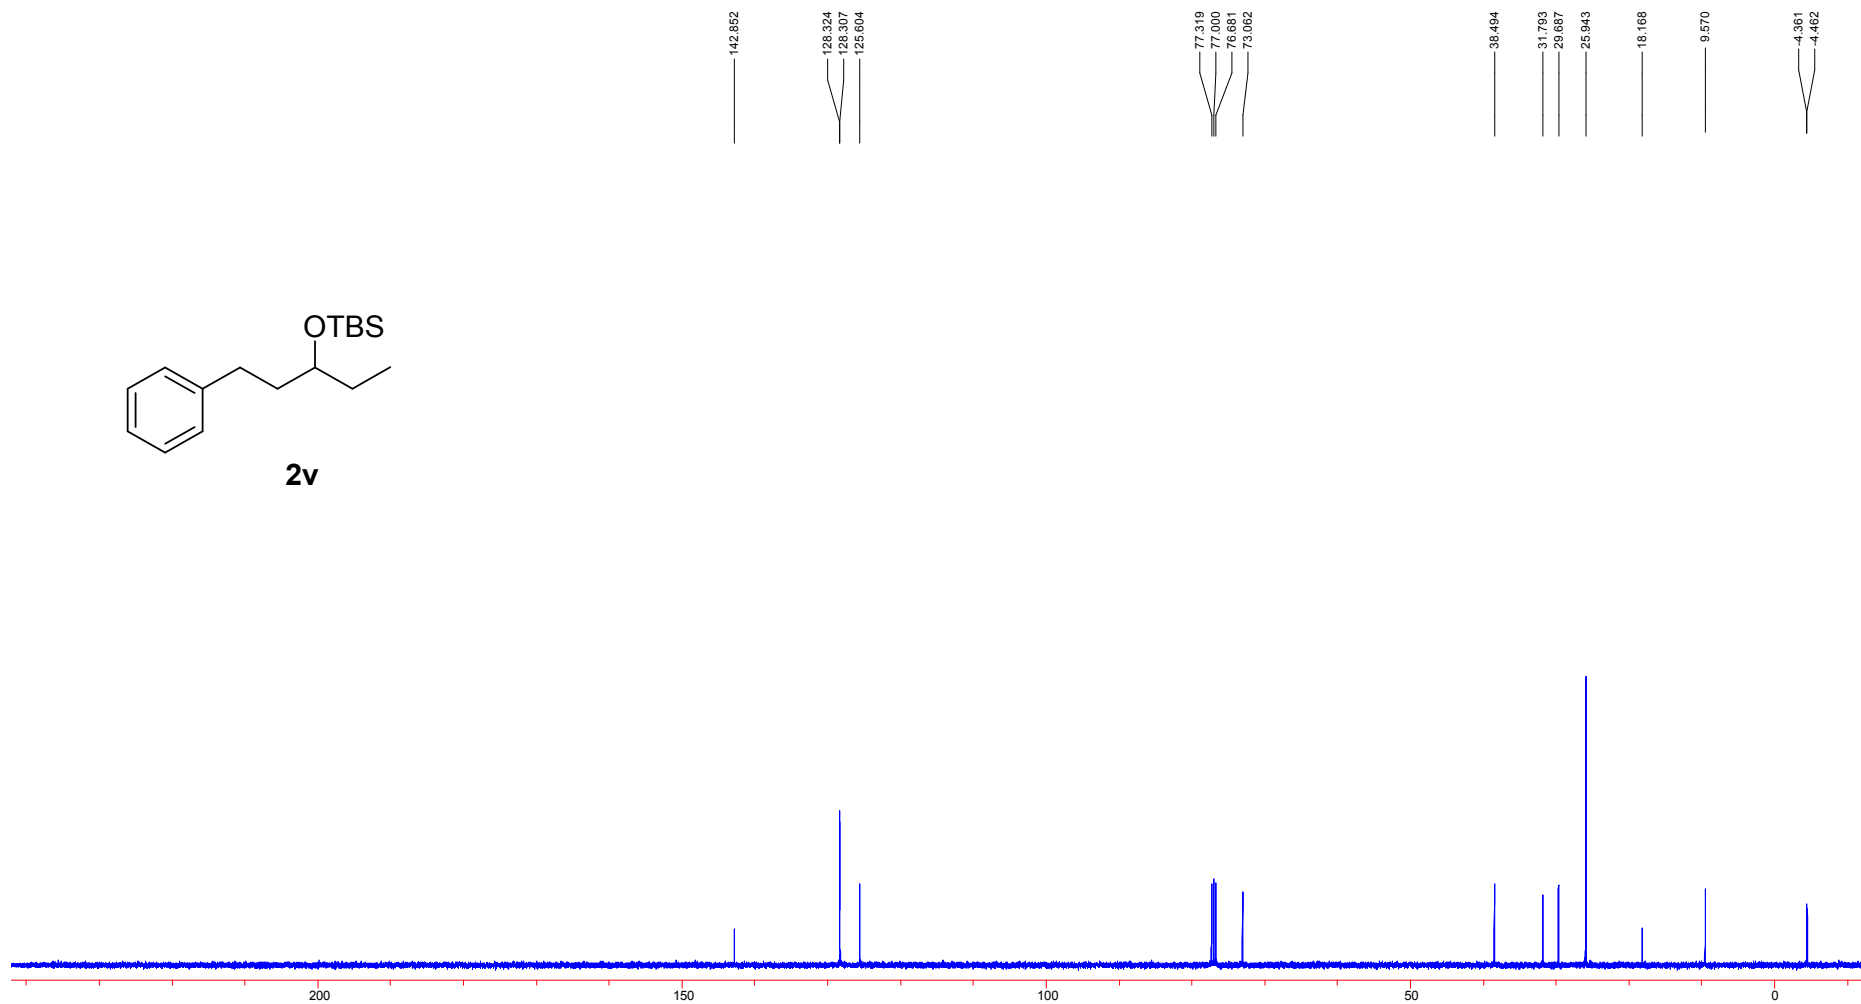

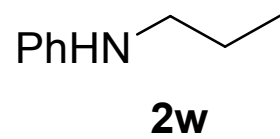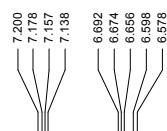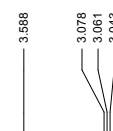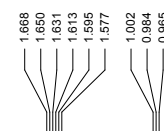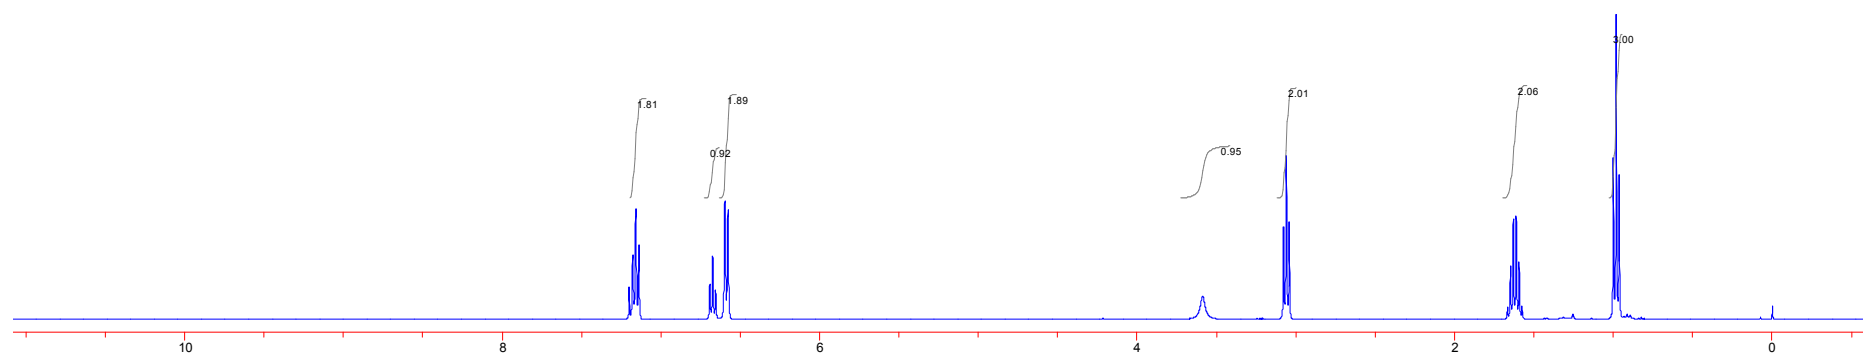

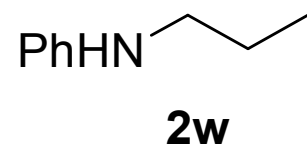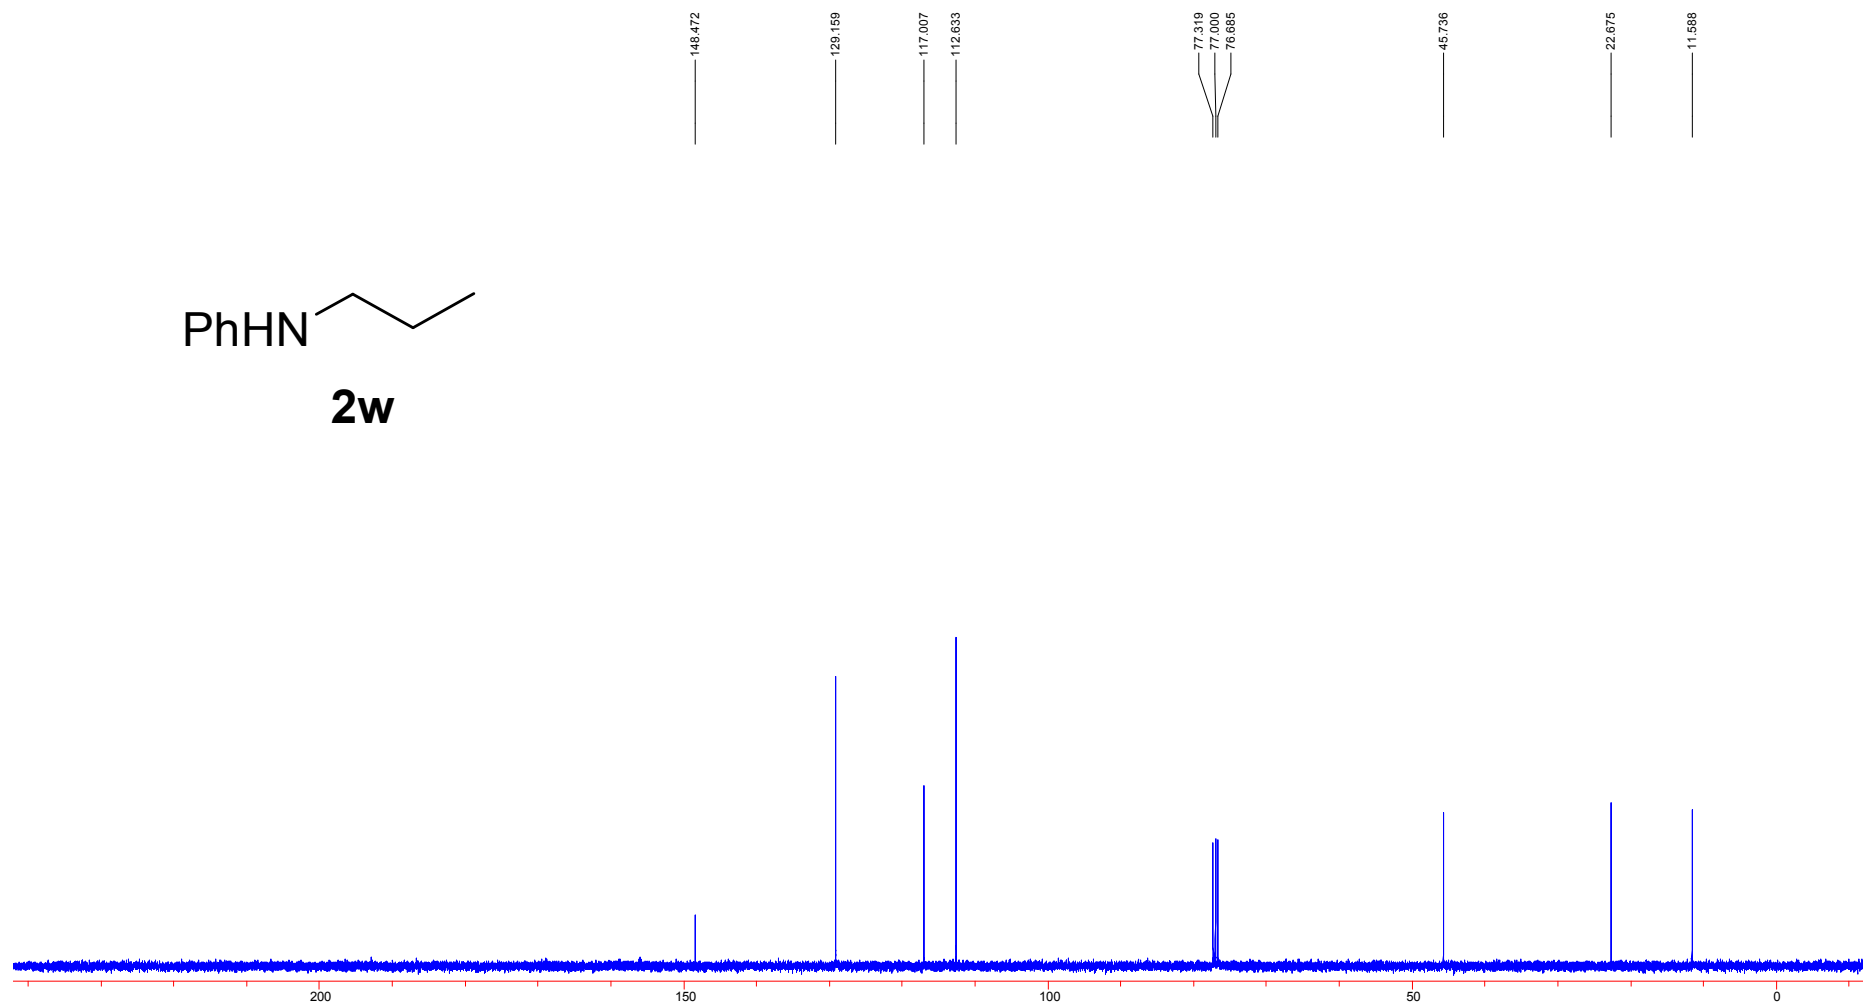

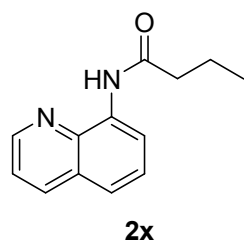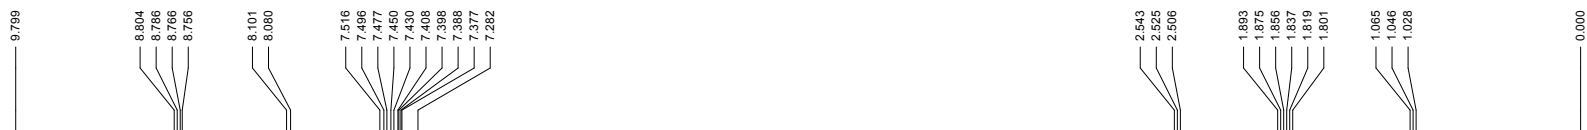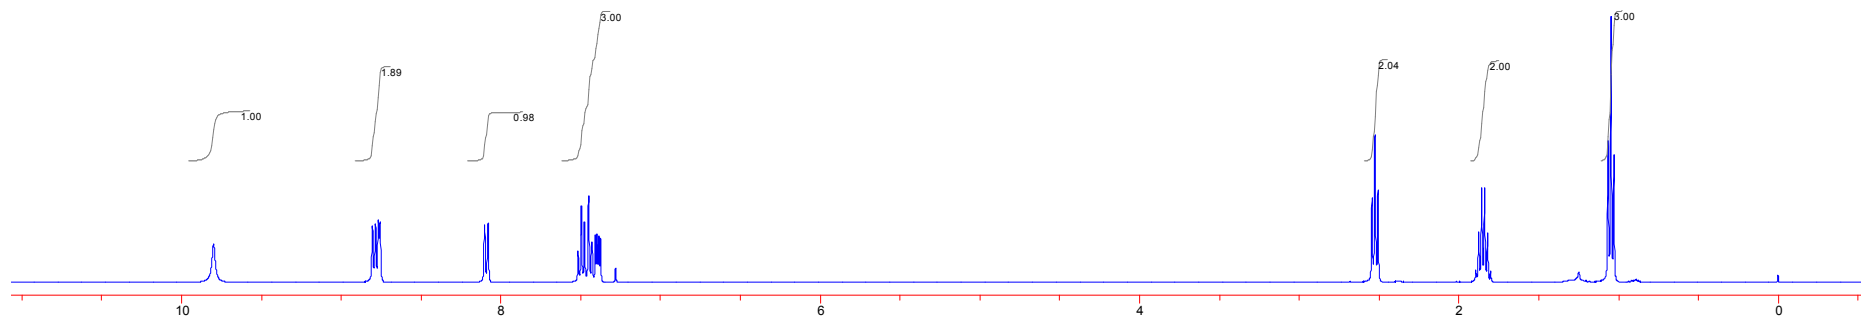

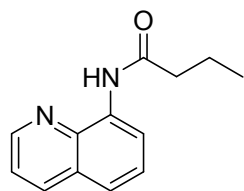

2x

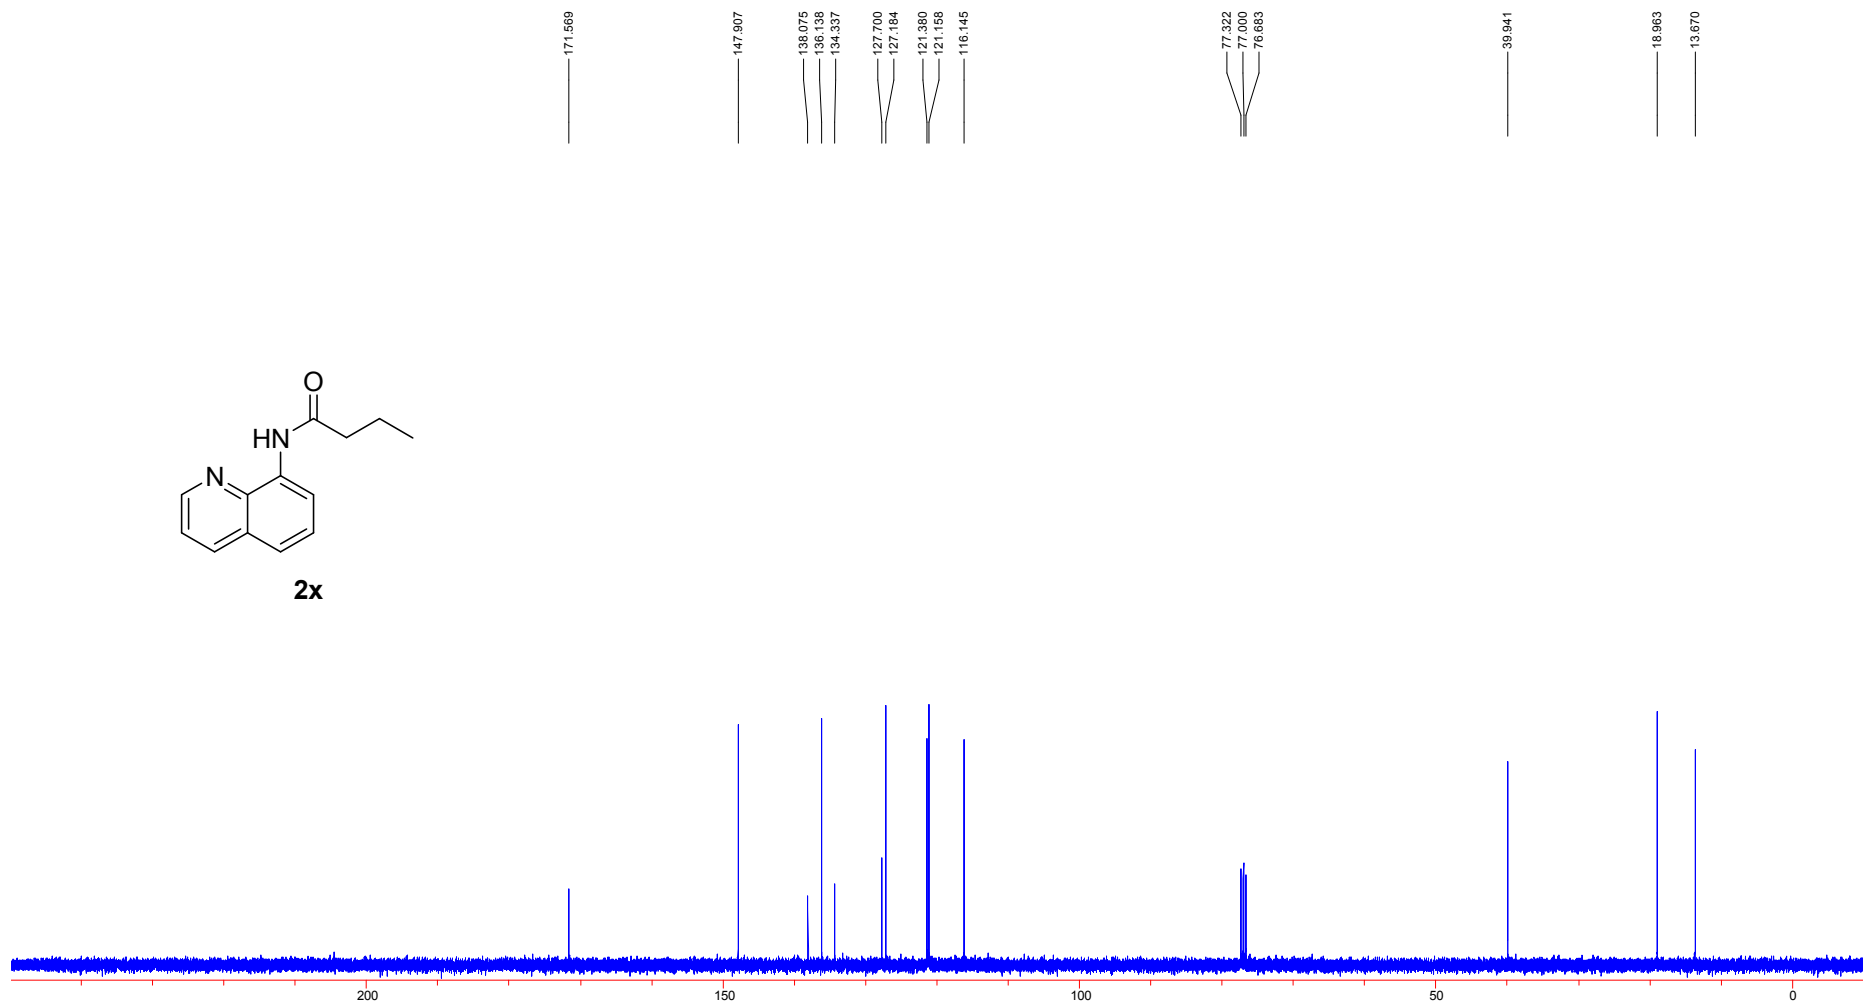

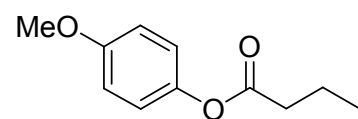

**2y**

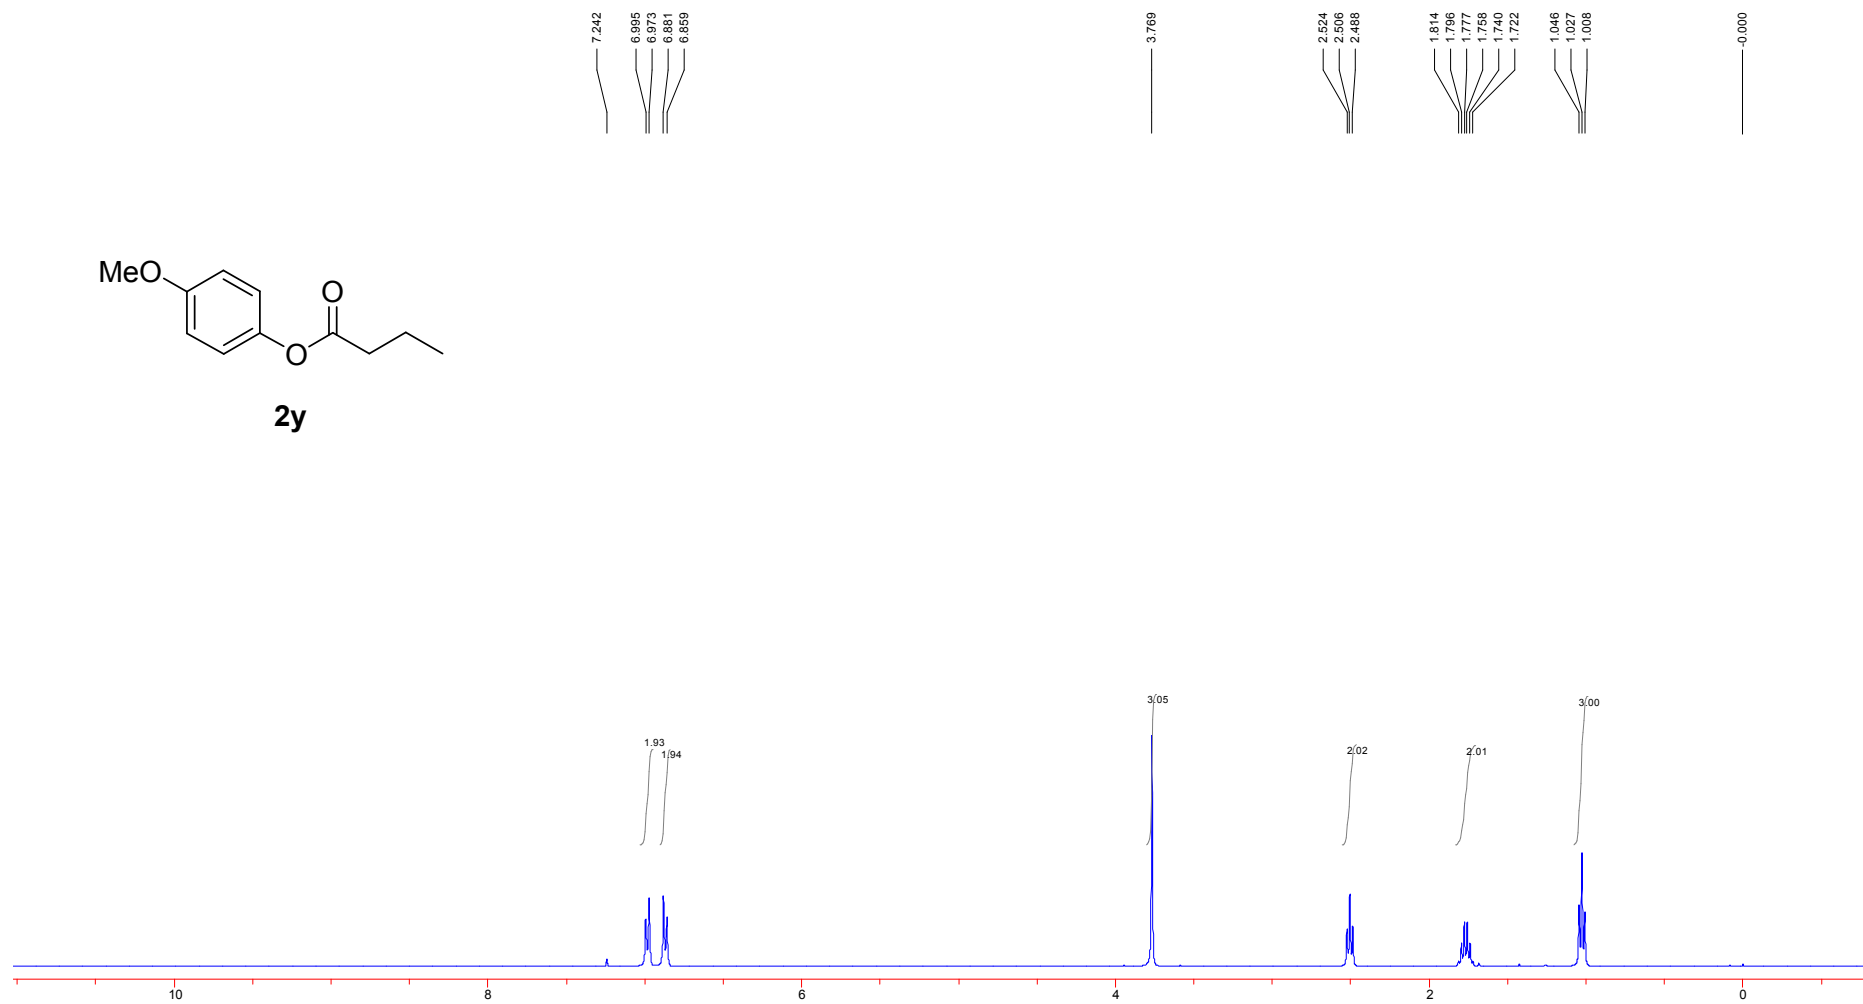

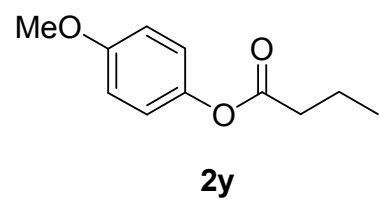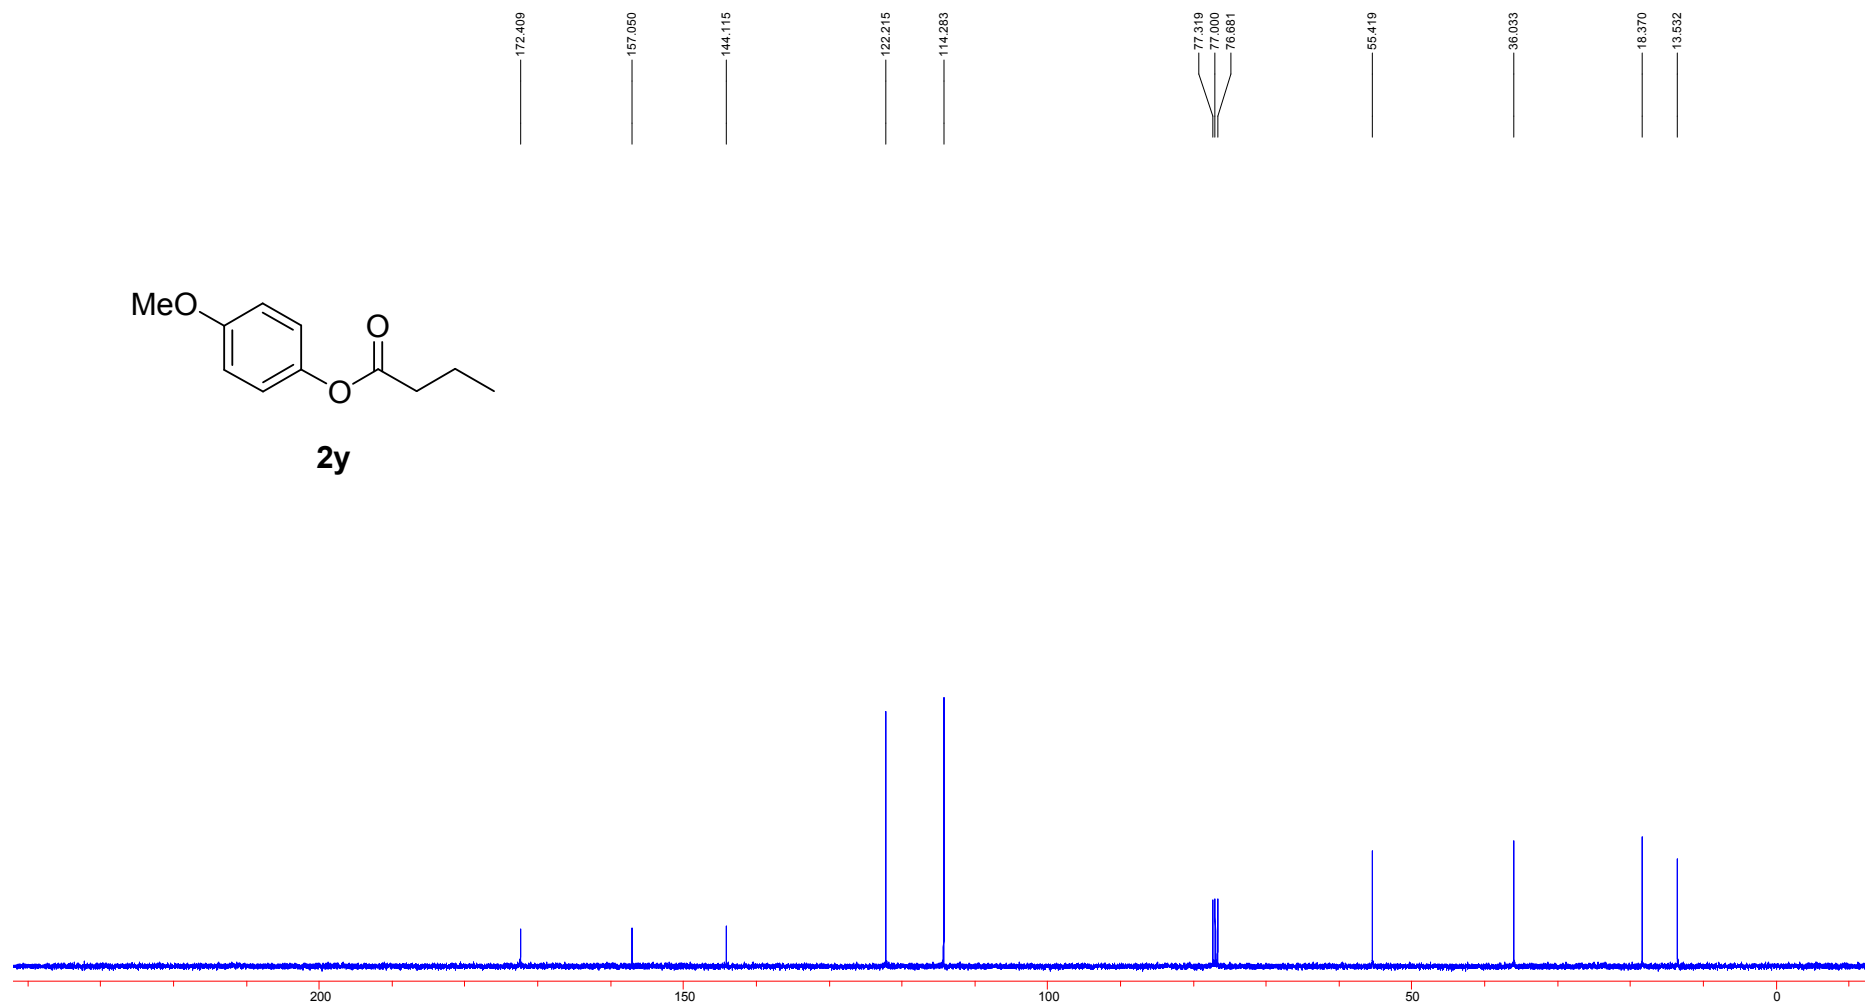

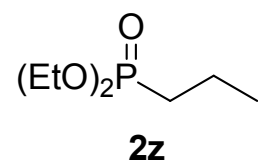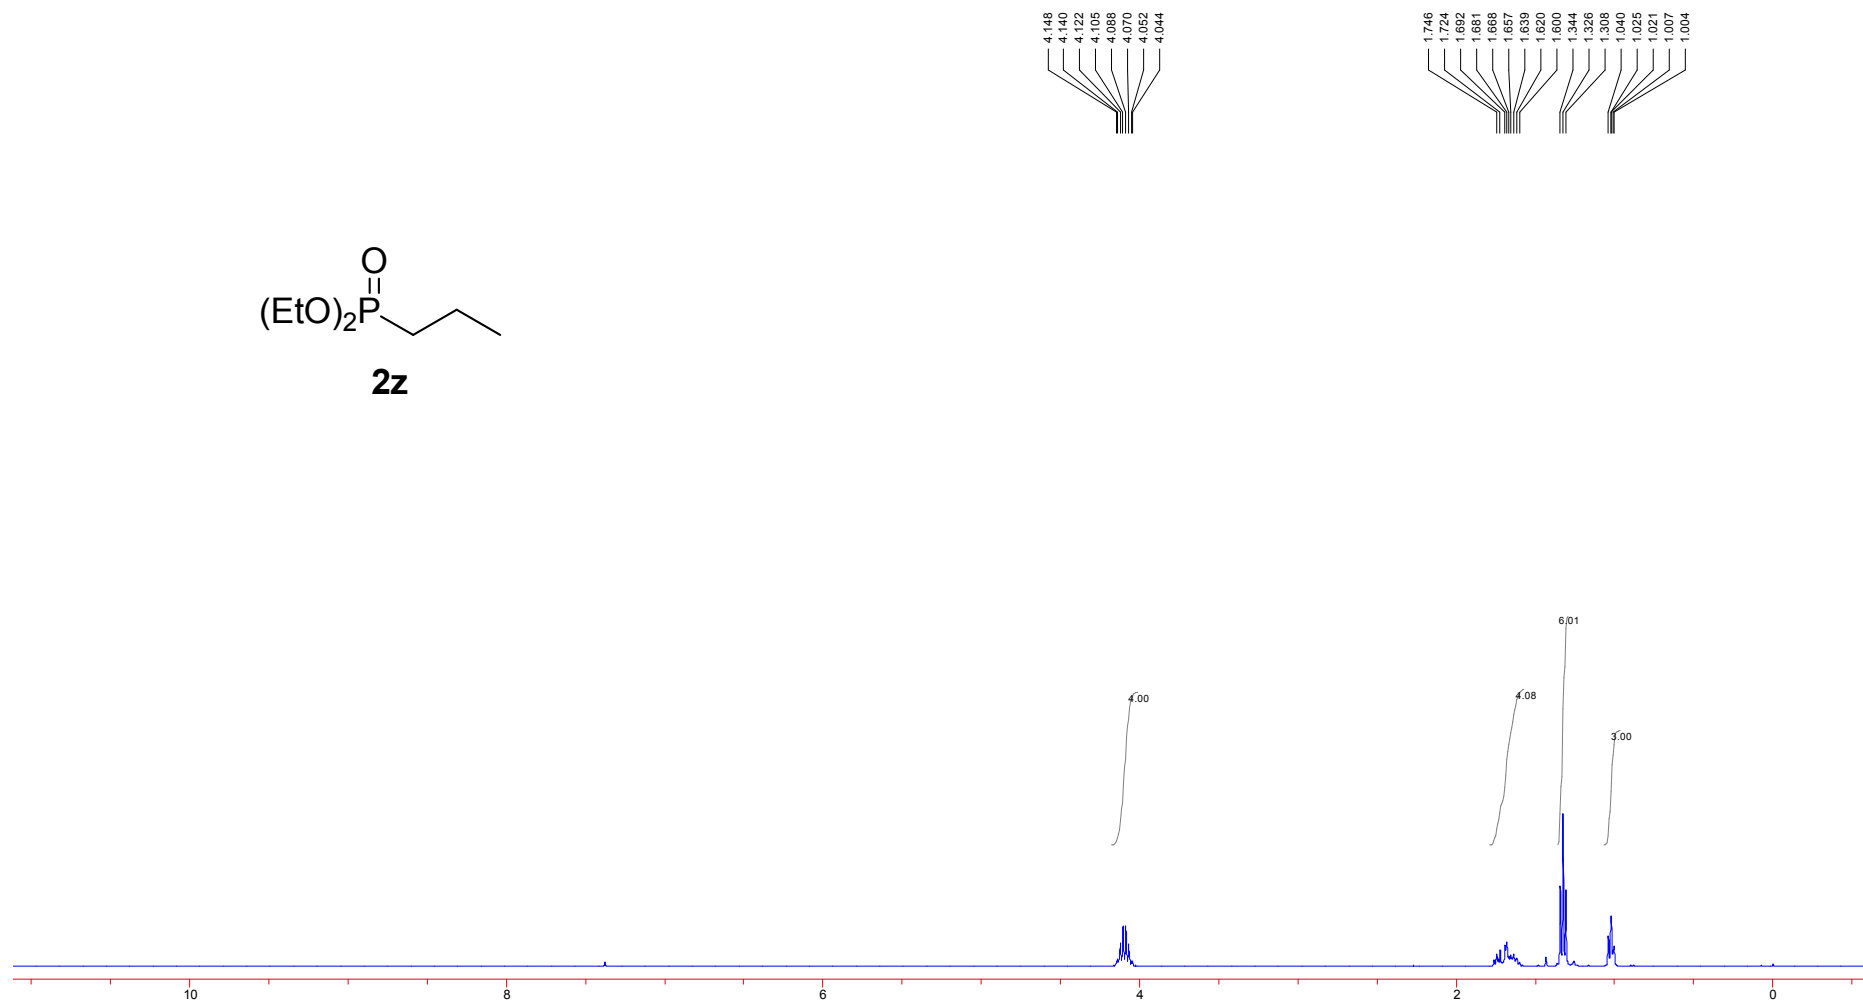

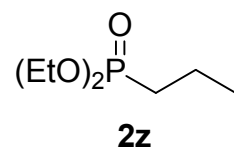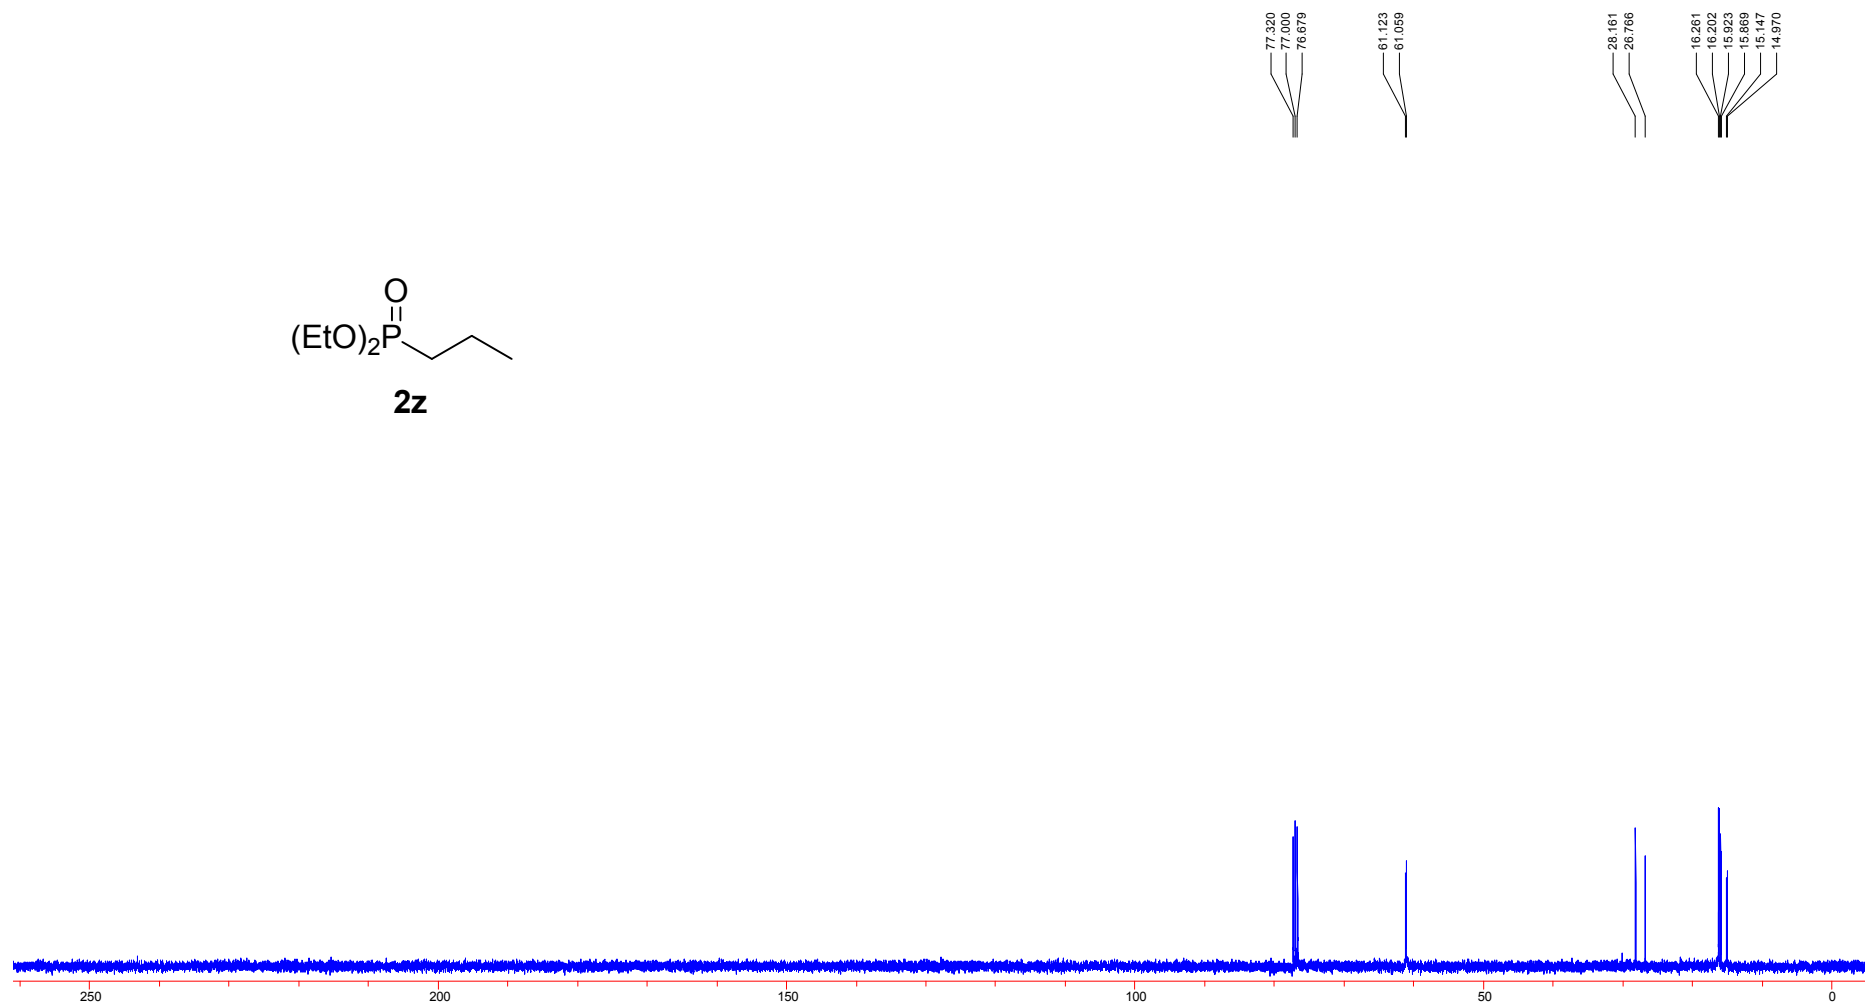

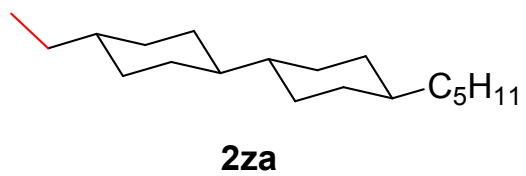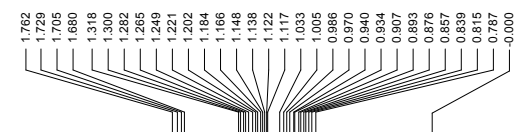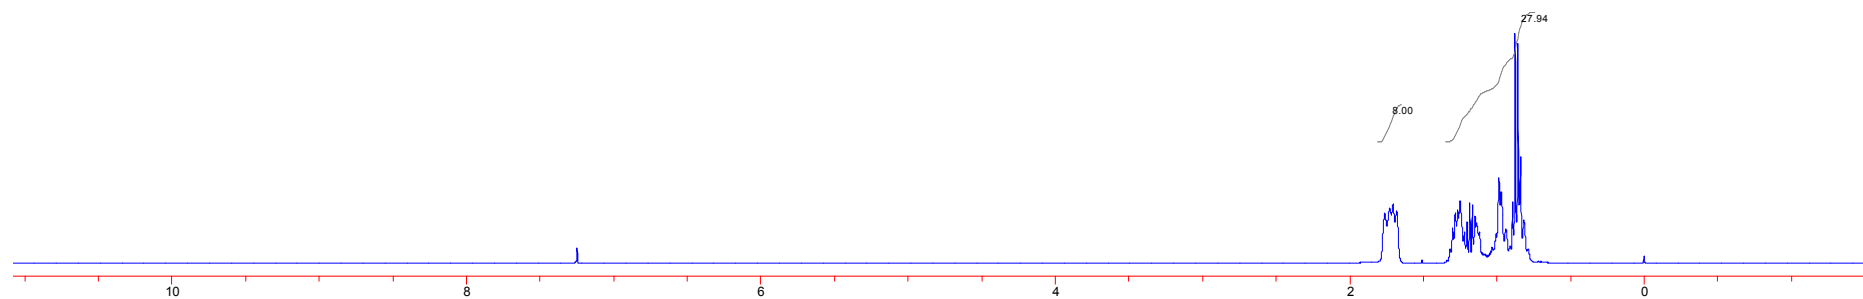

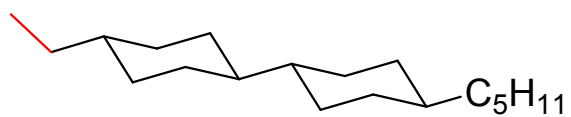

**2za**

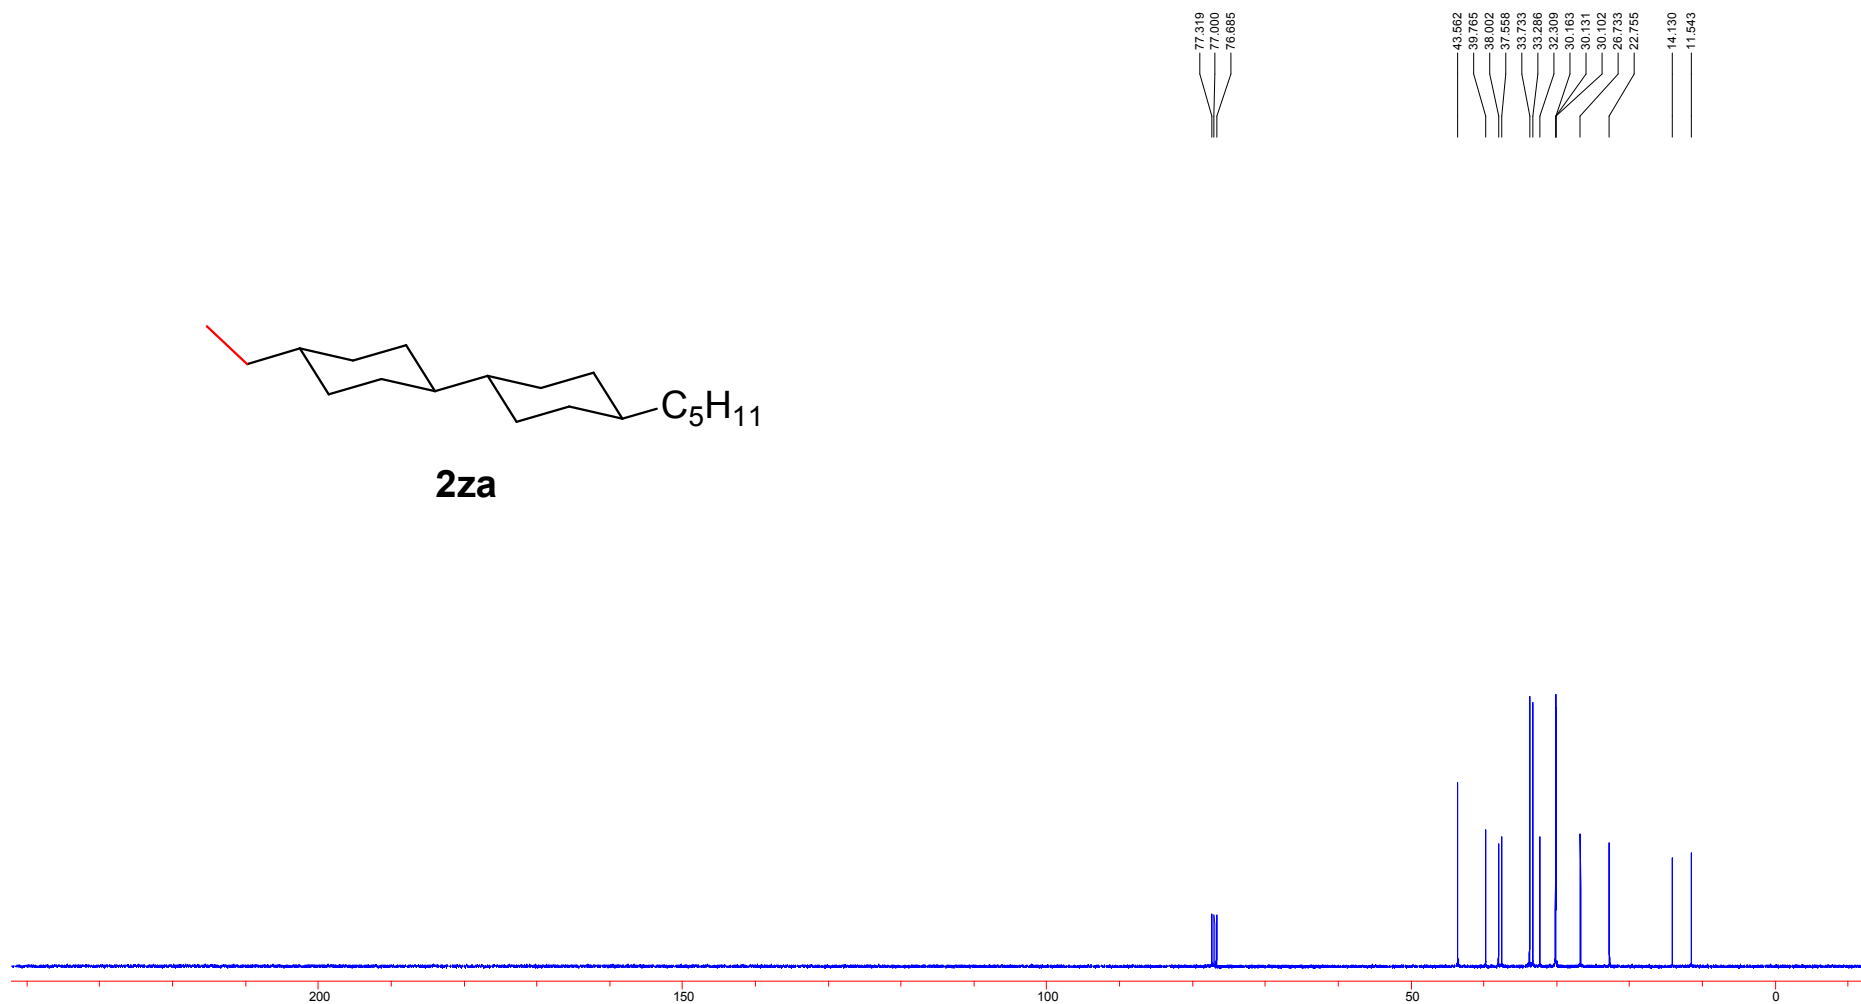

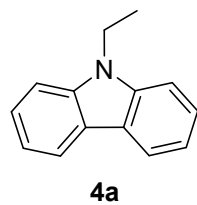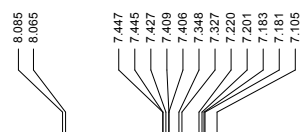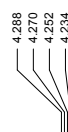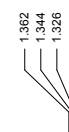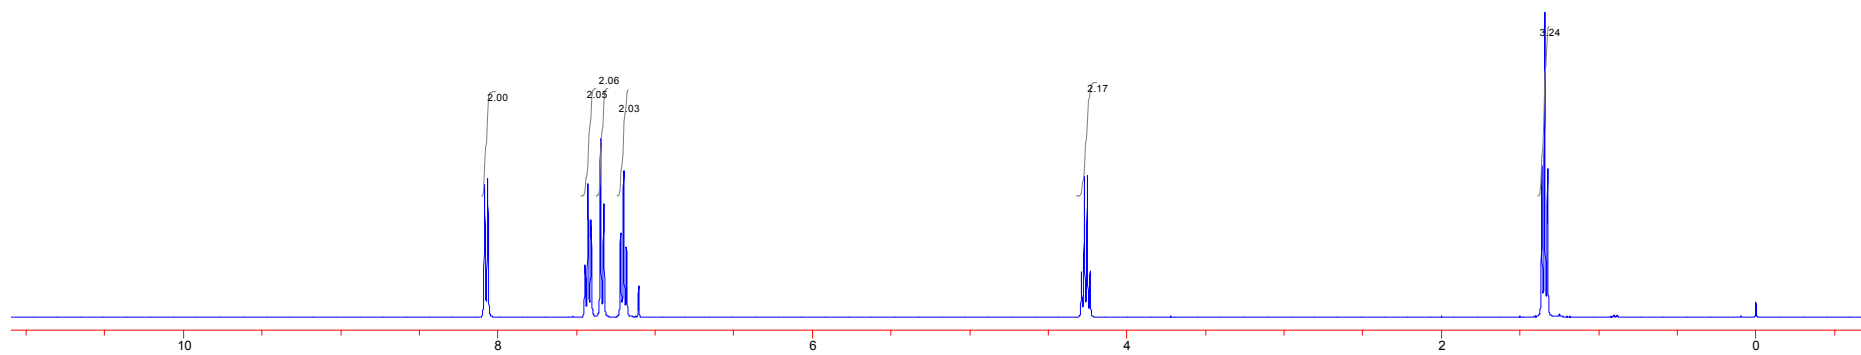

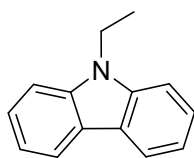

**4a**

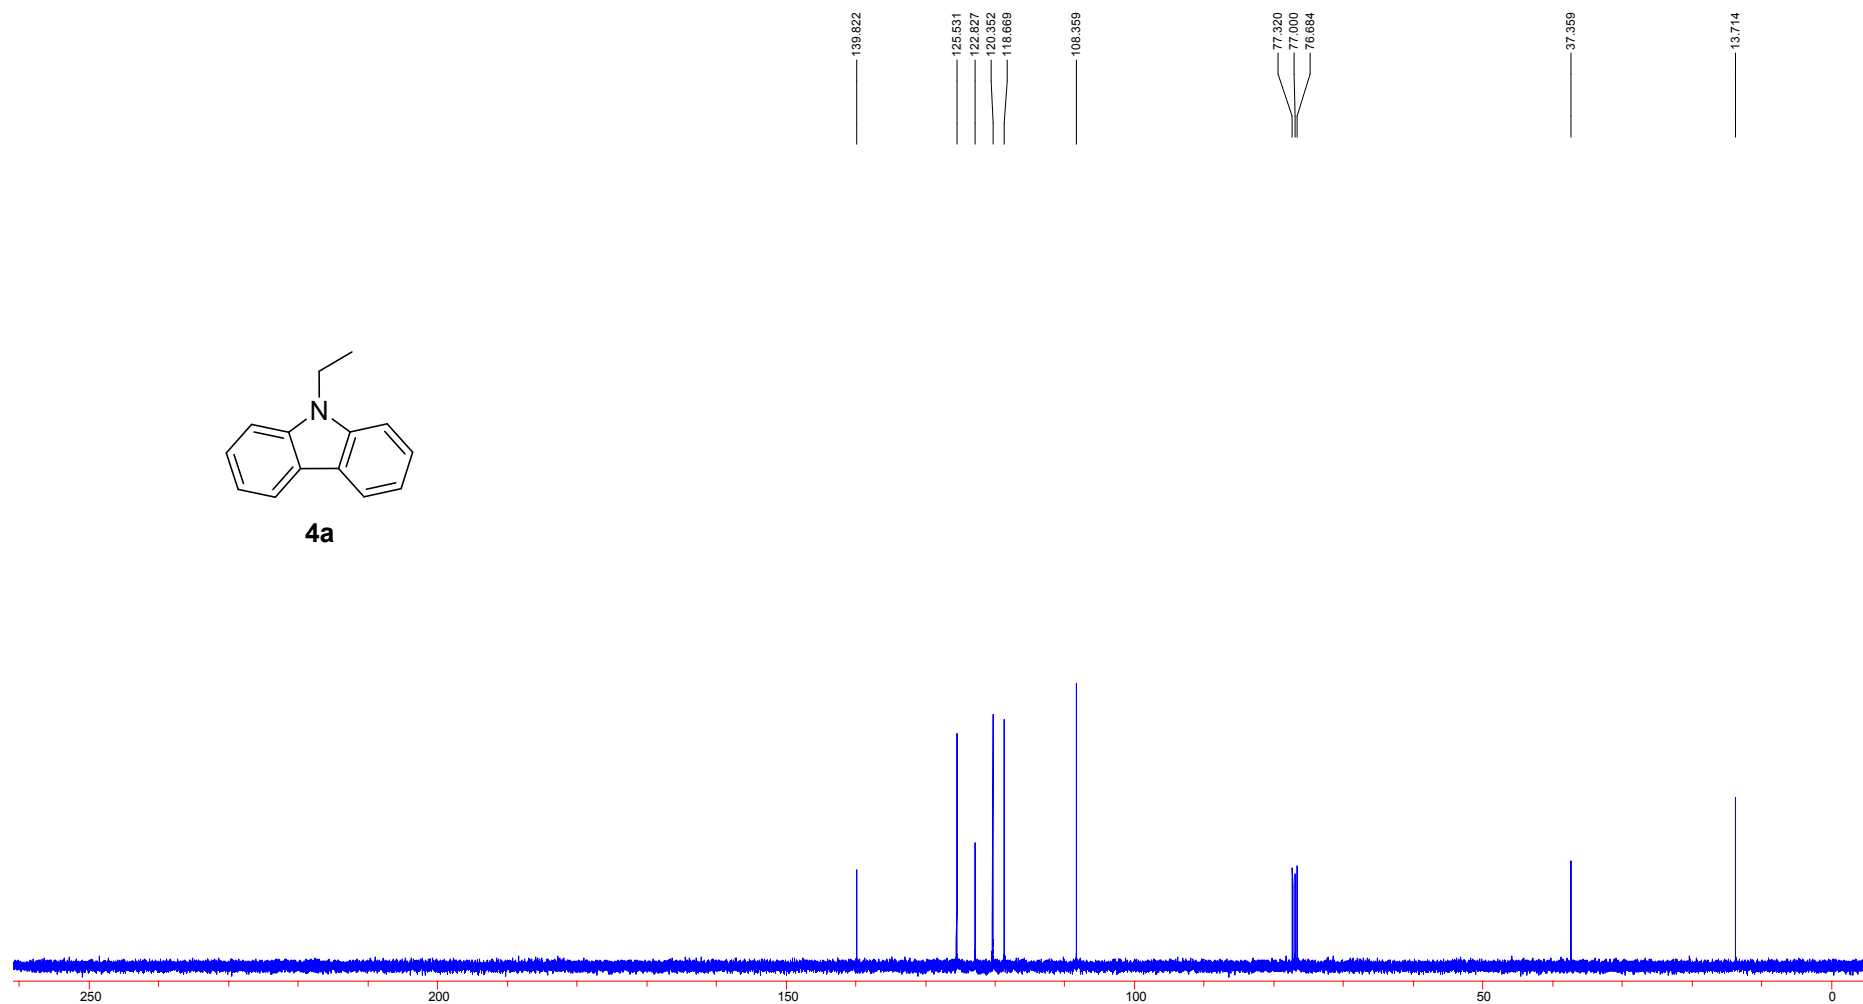

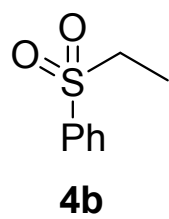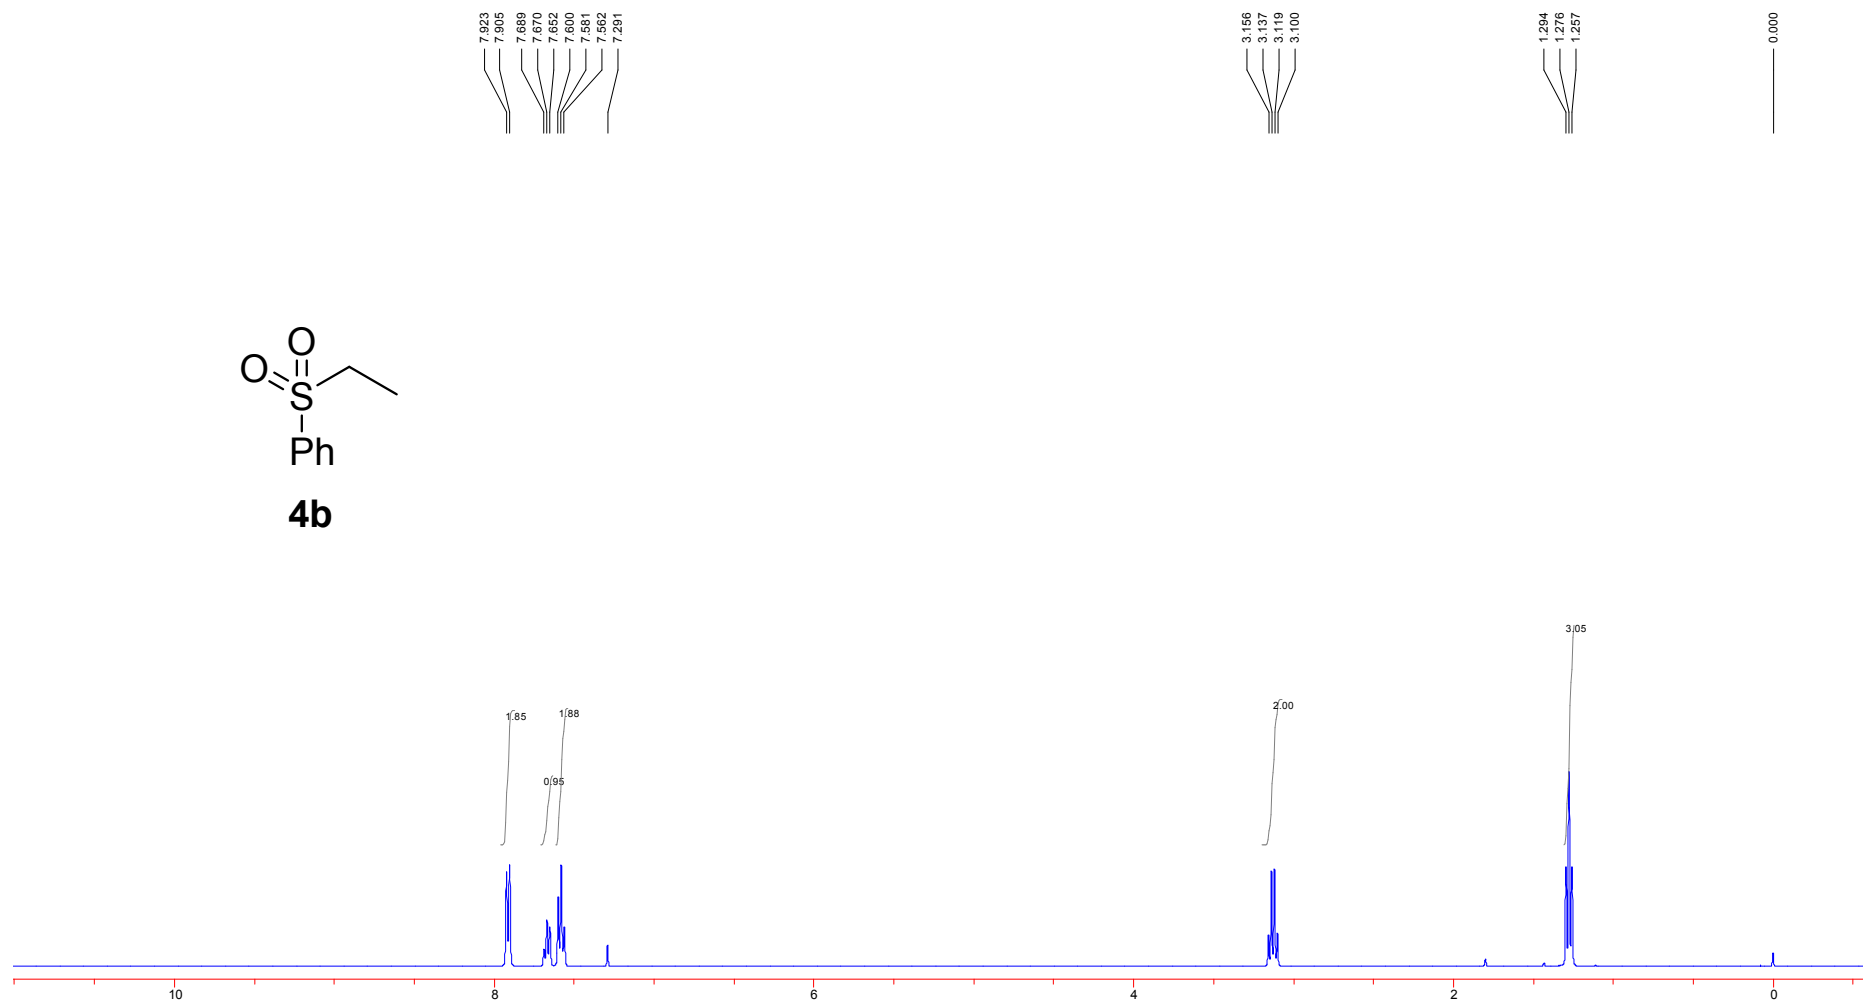

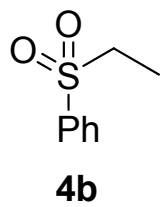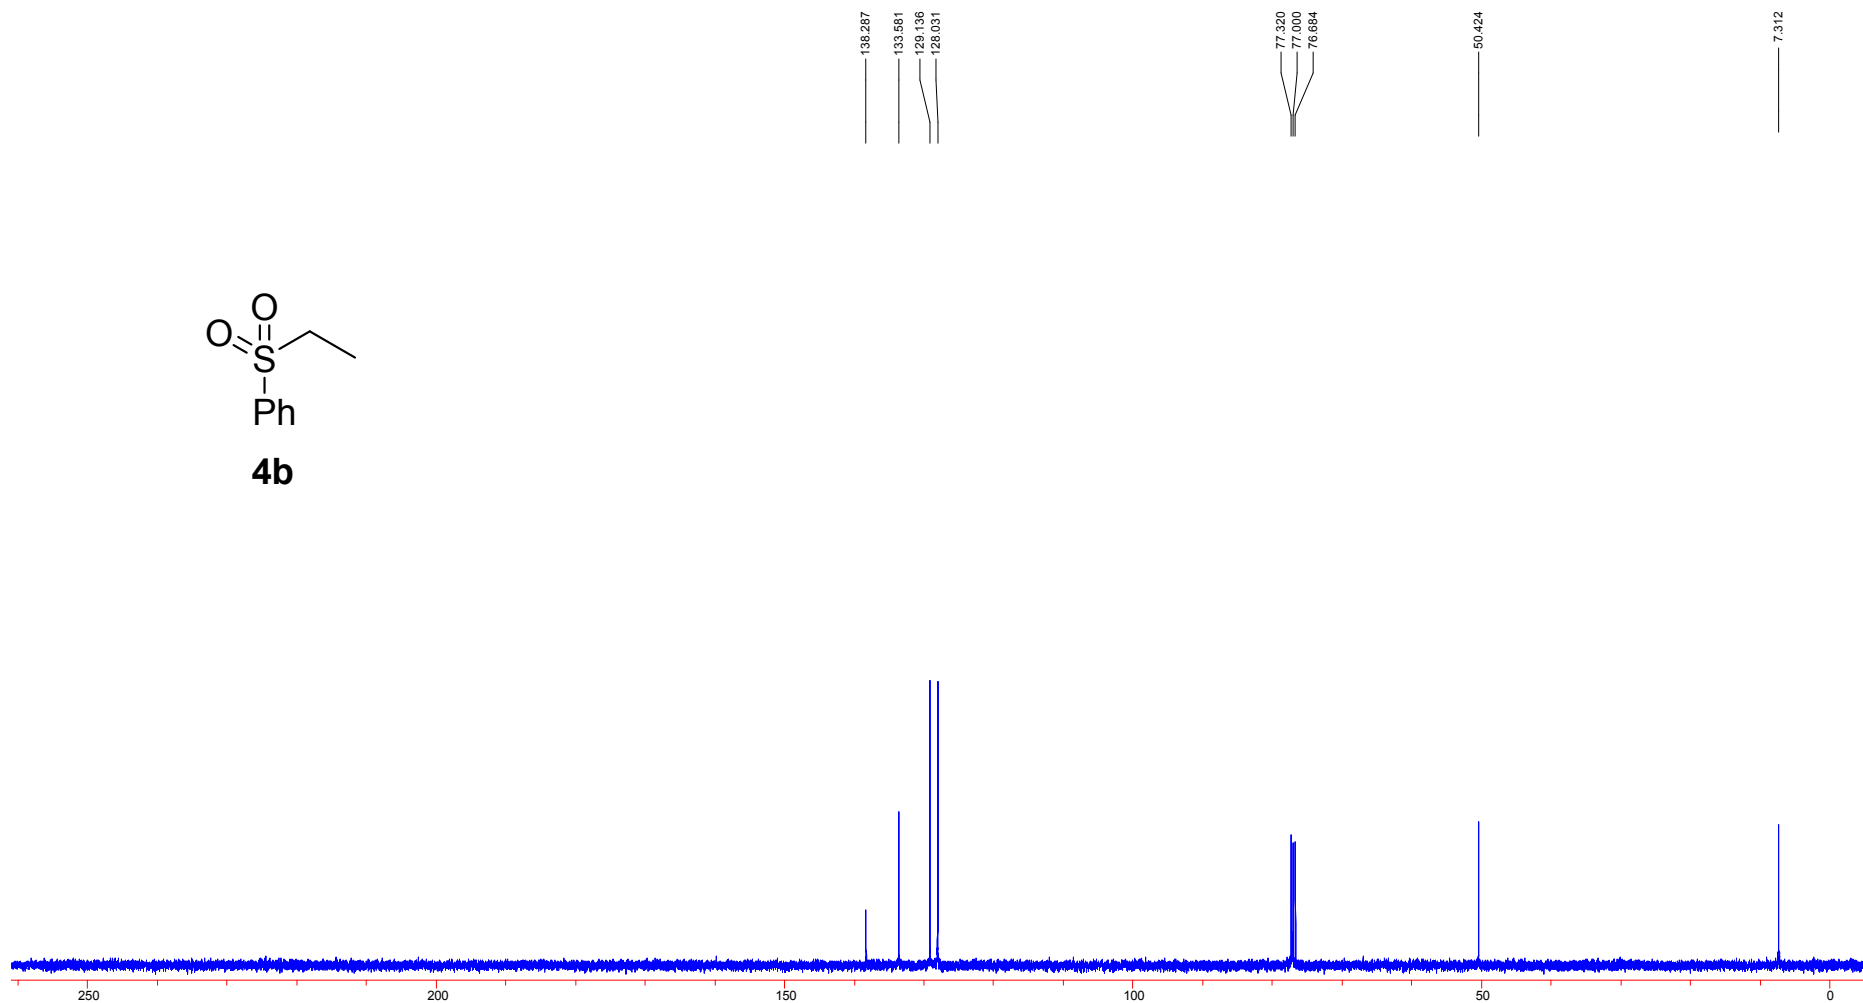

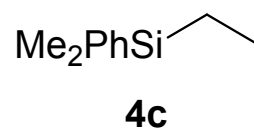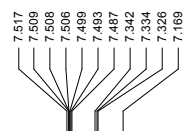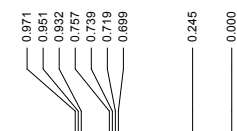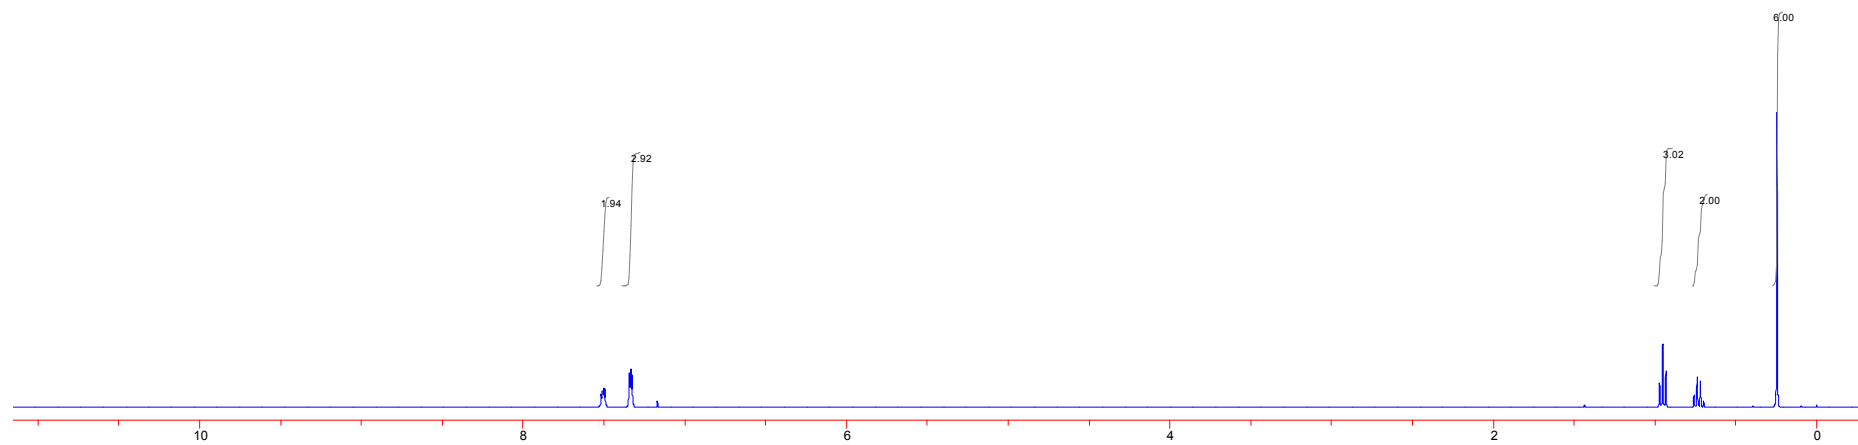

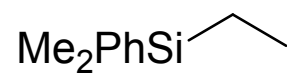

**4c**

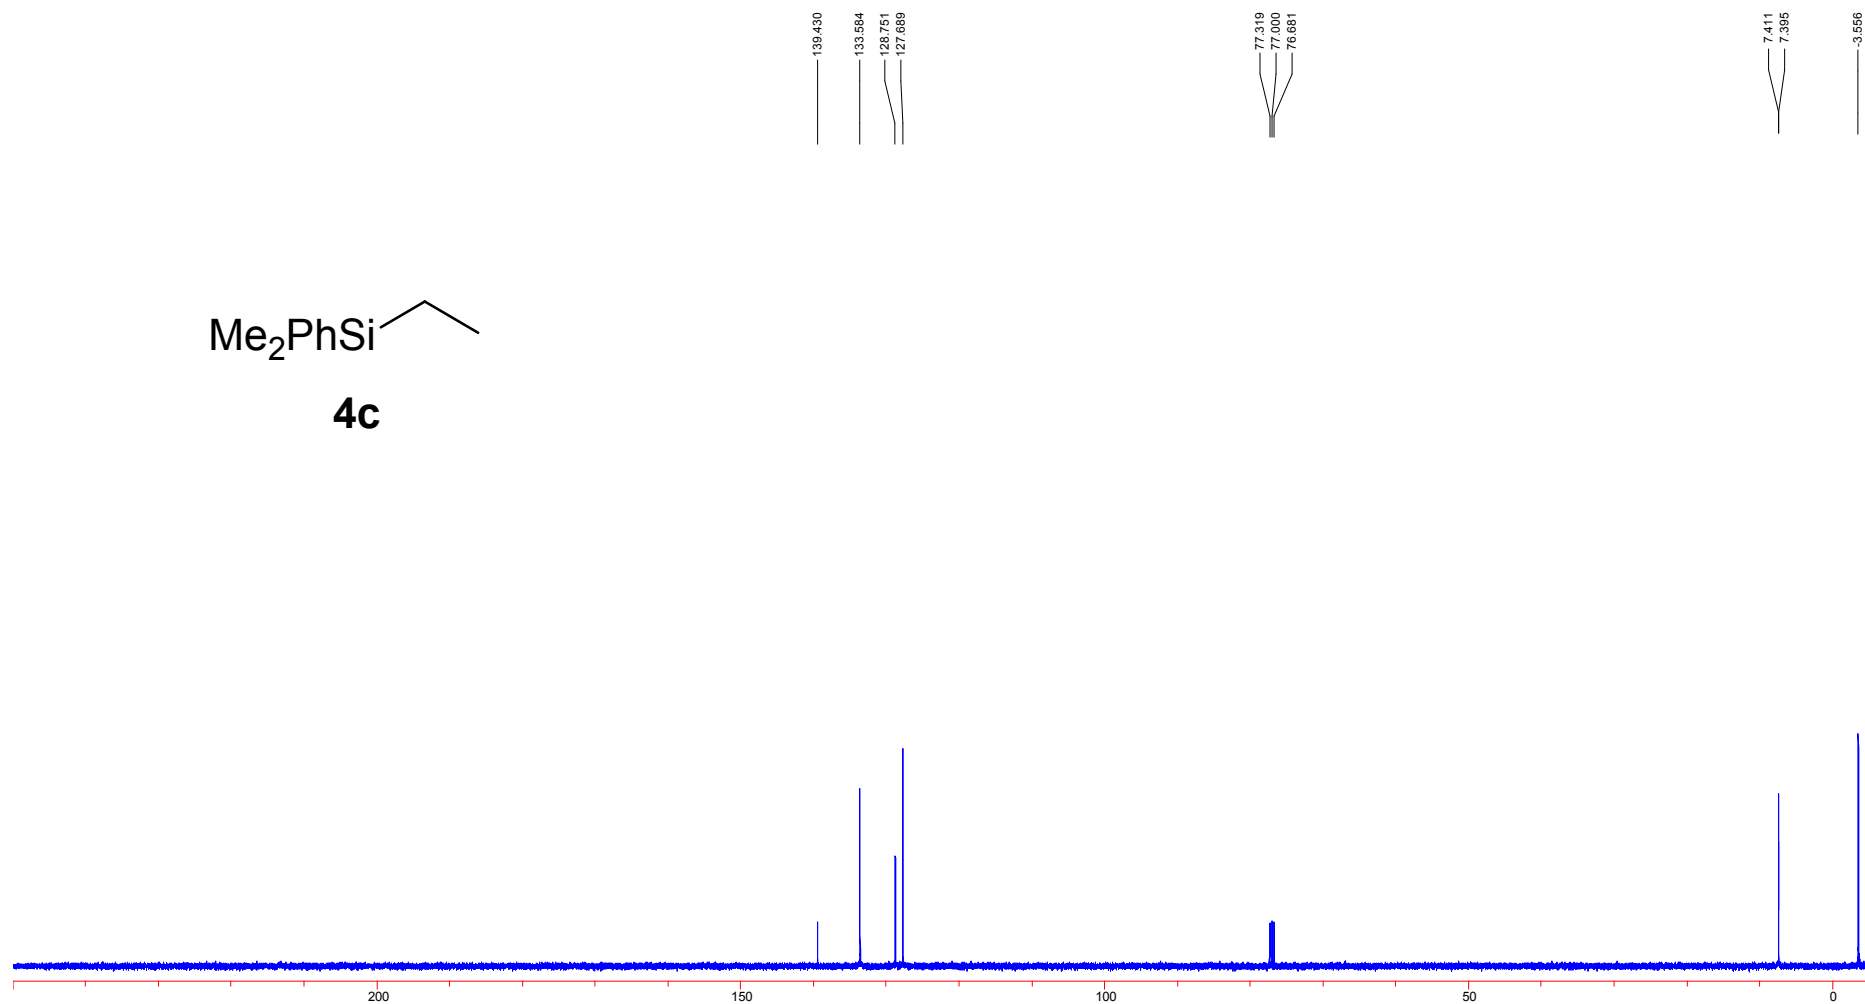

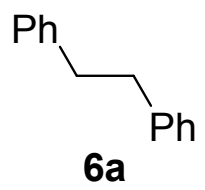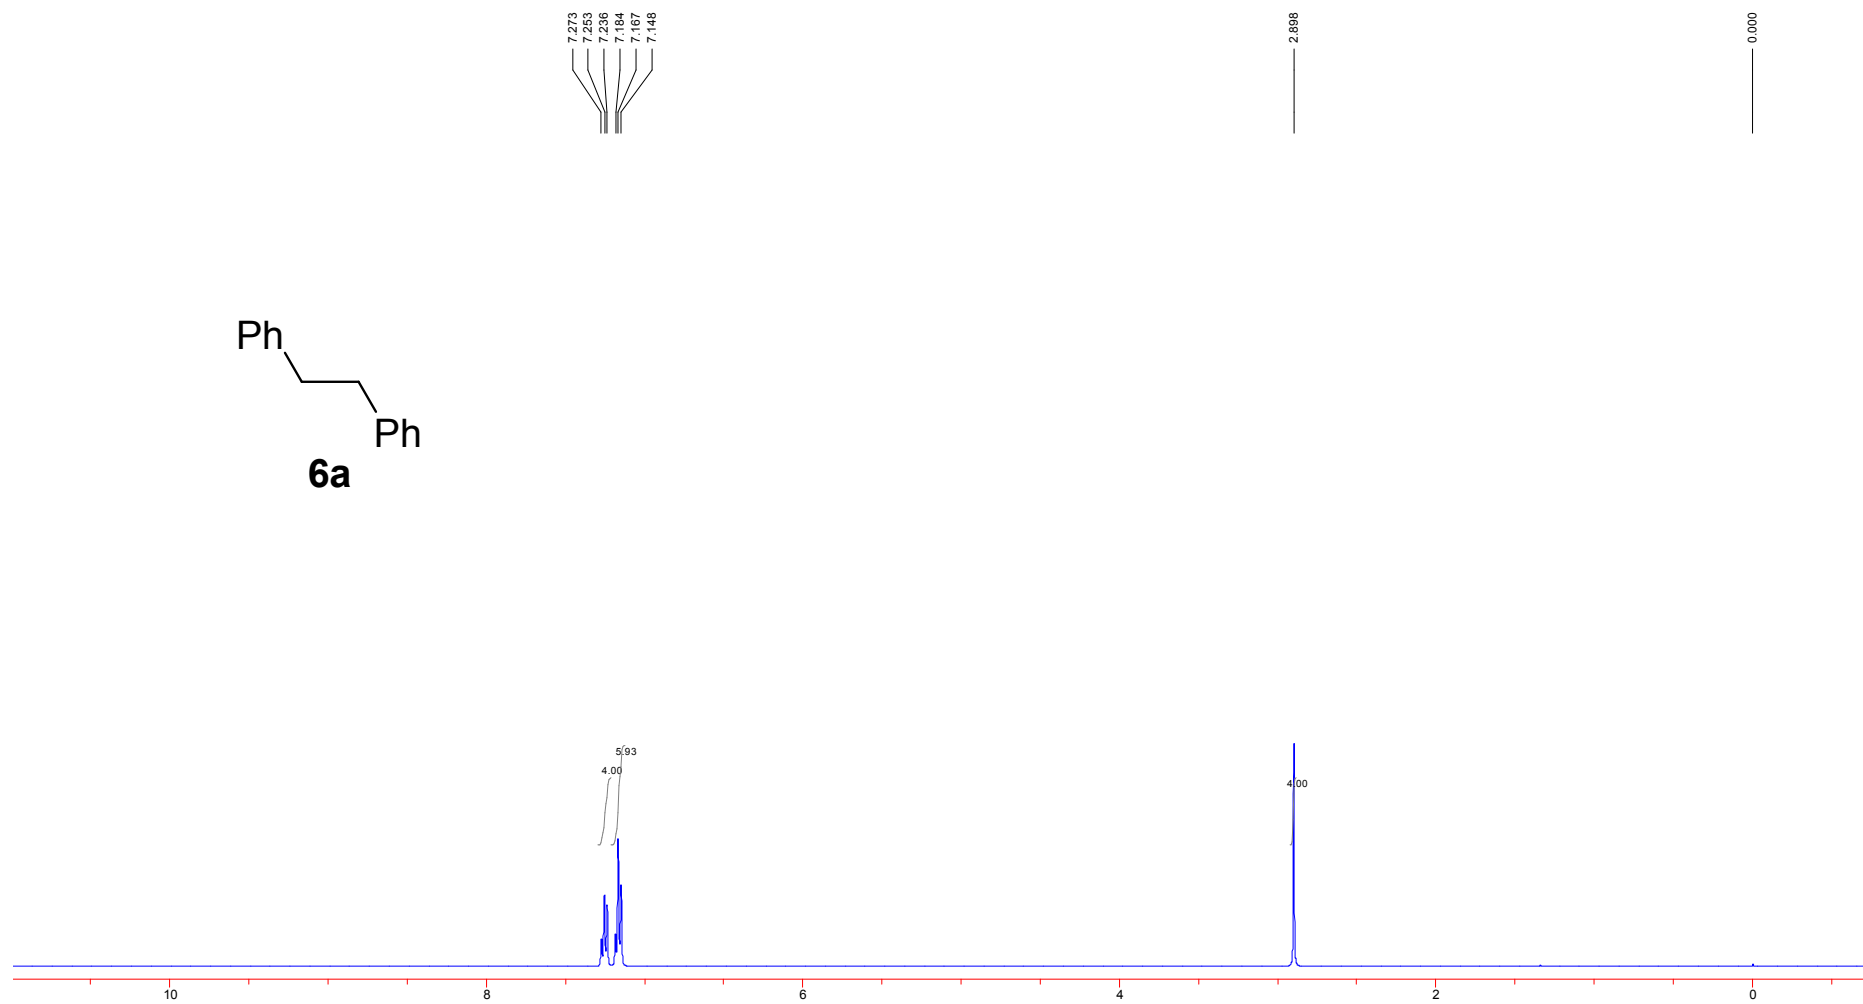

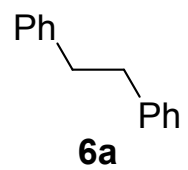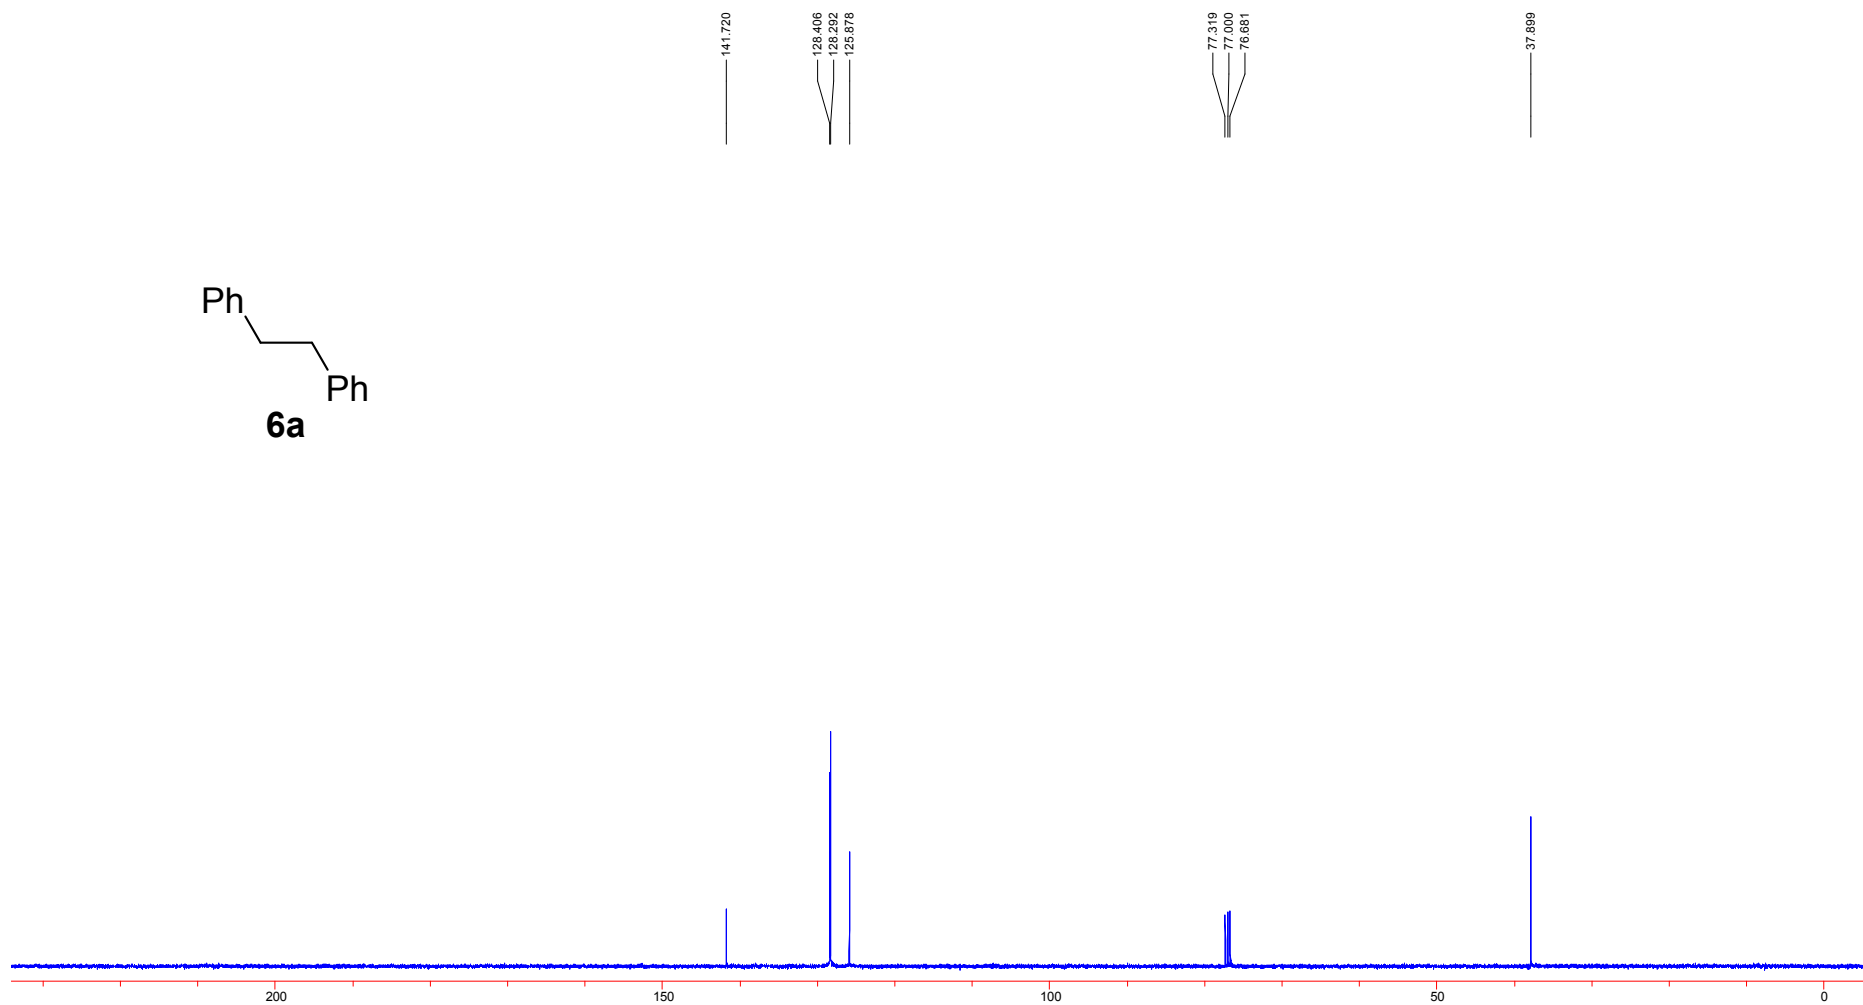

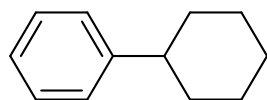

**6c**

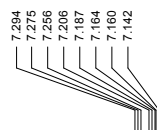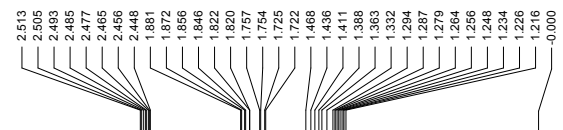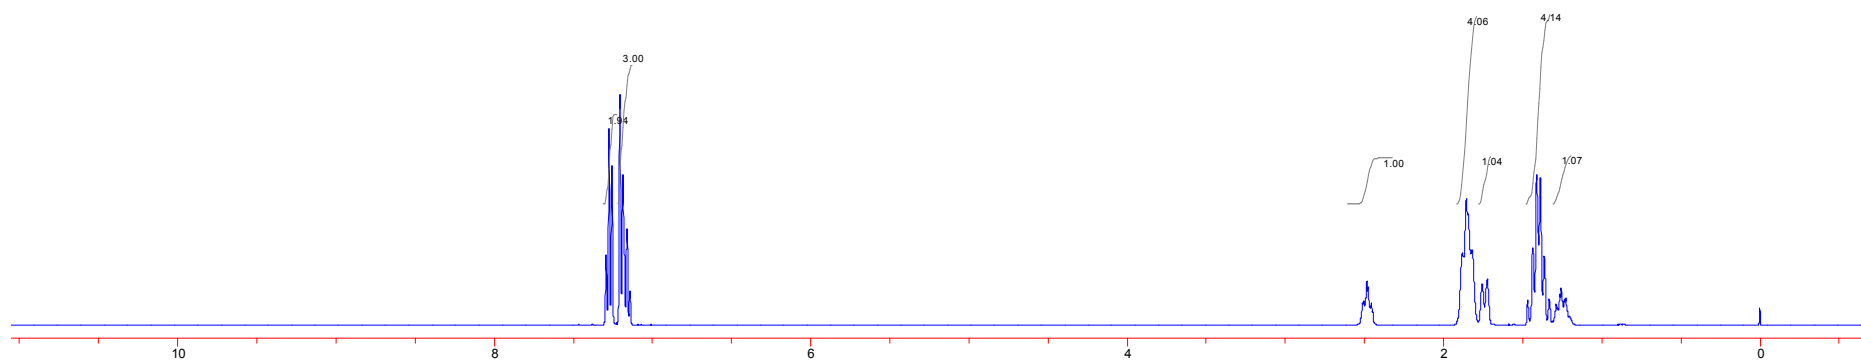

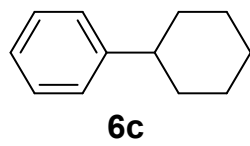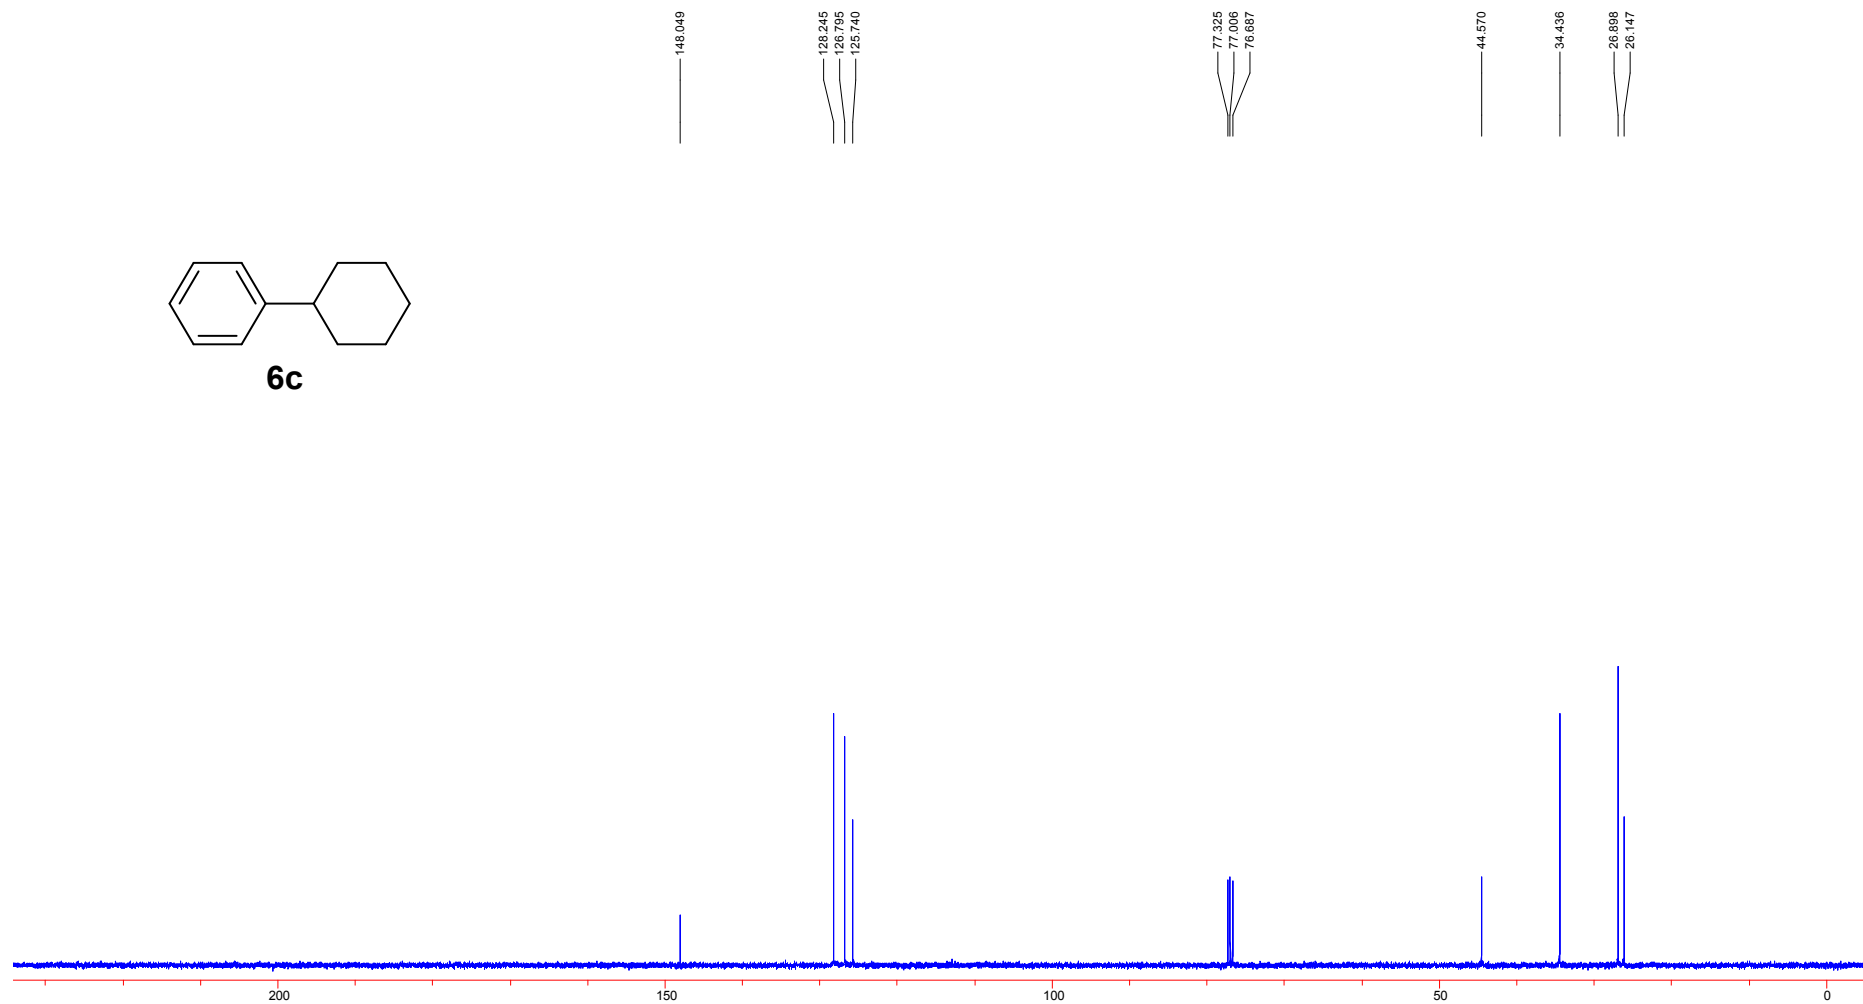

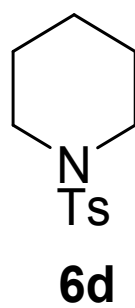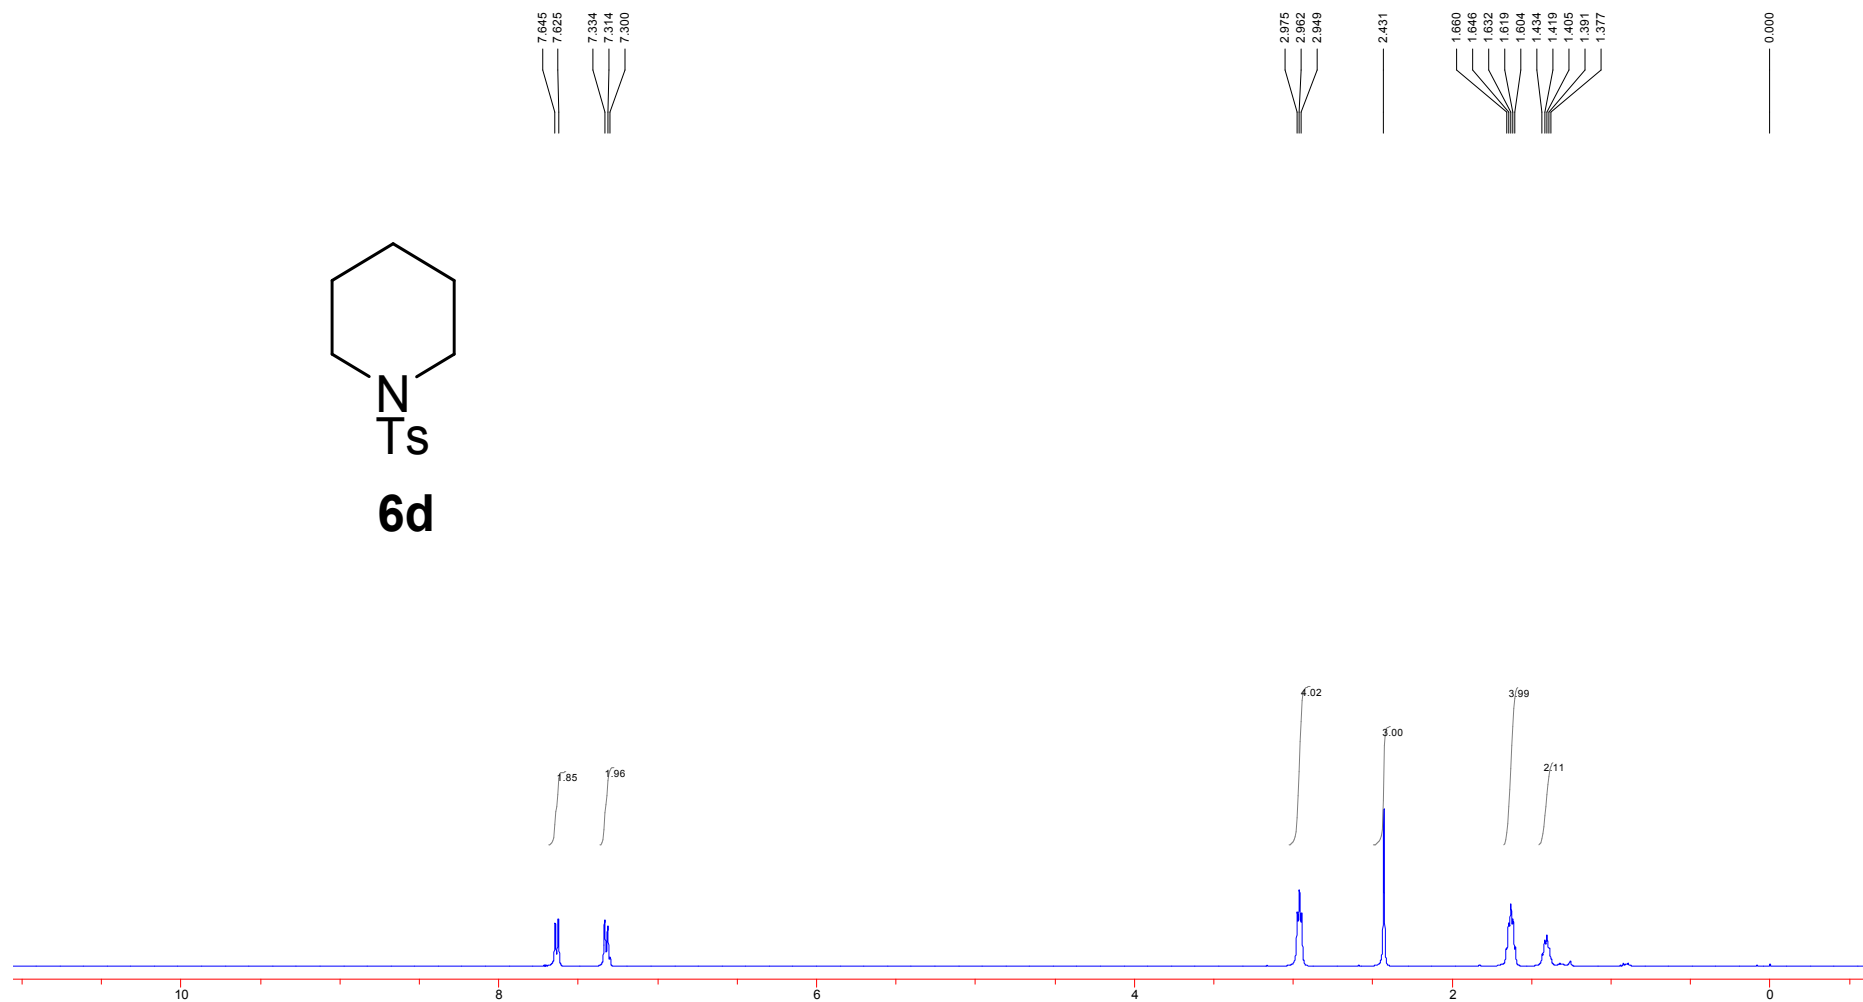

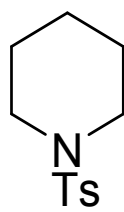

**6d**

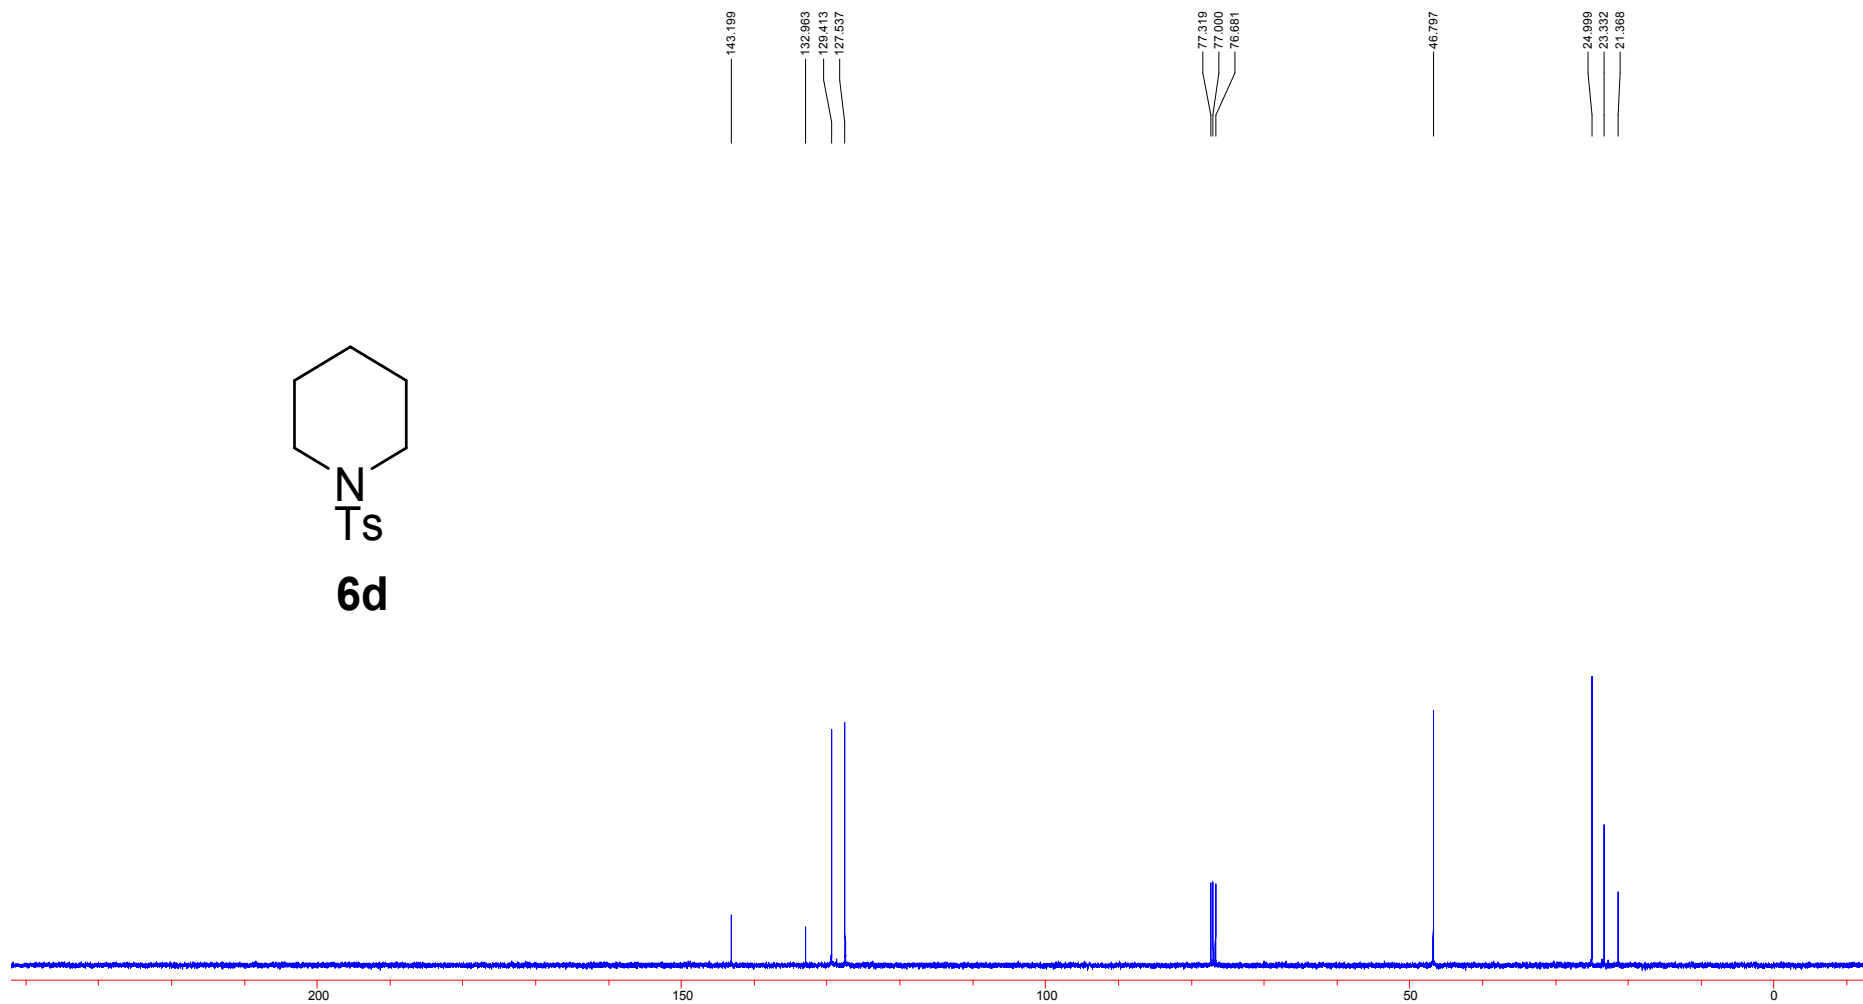

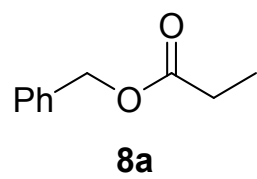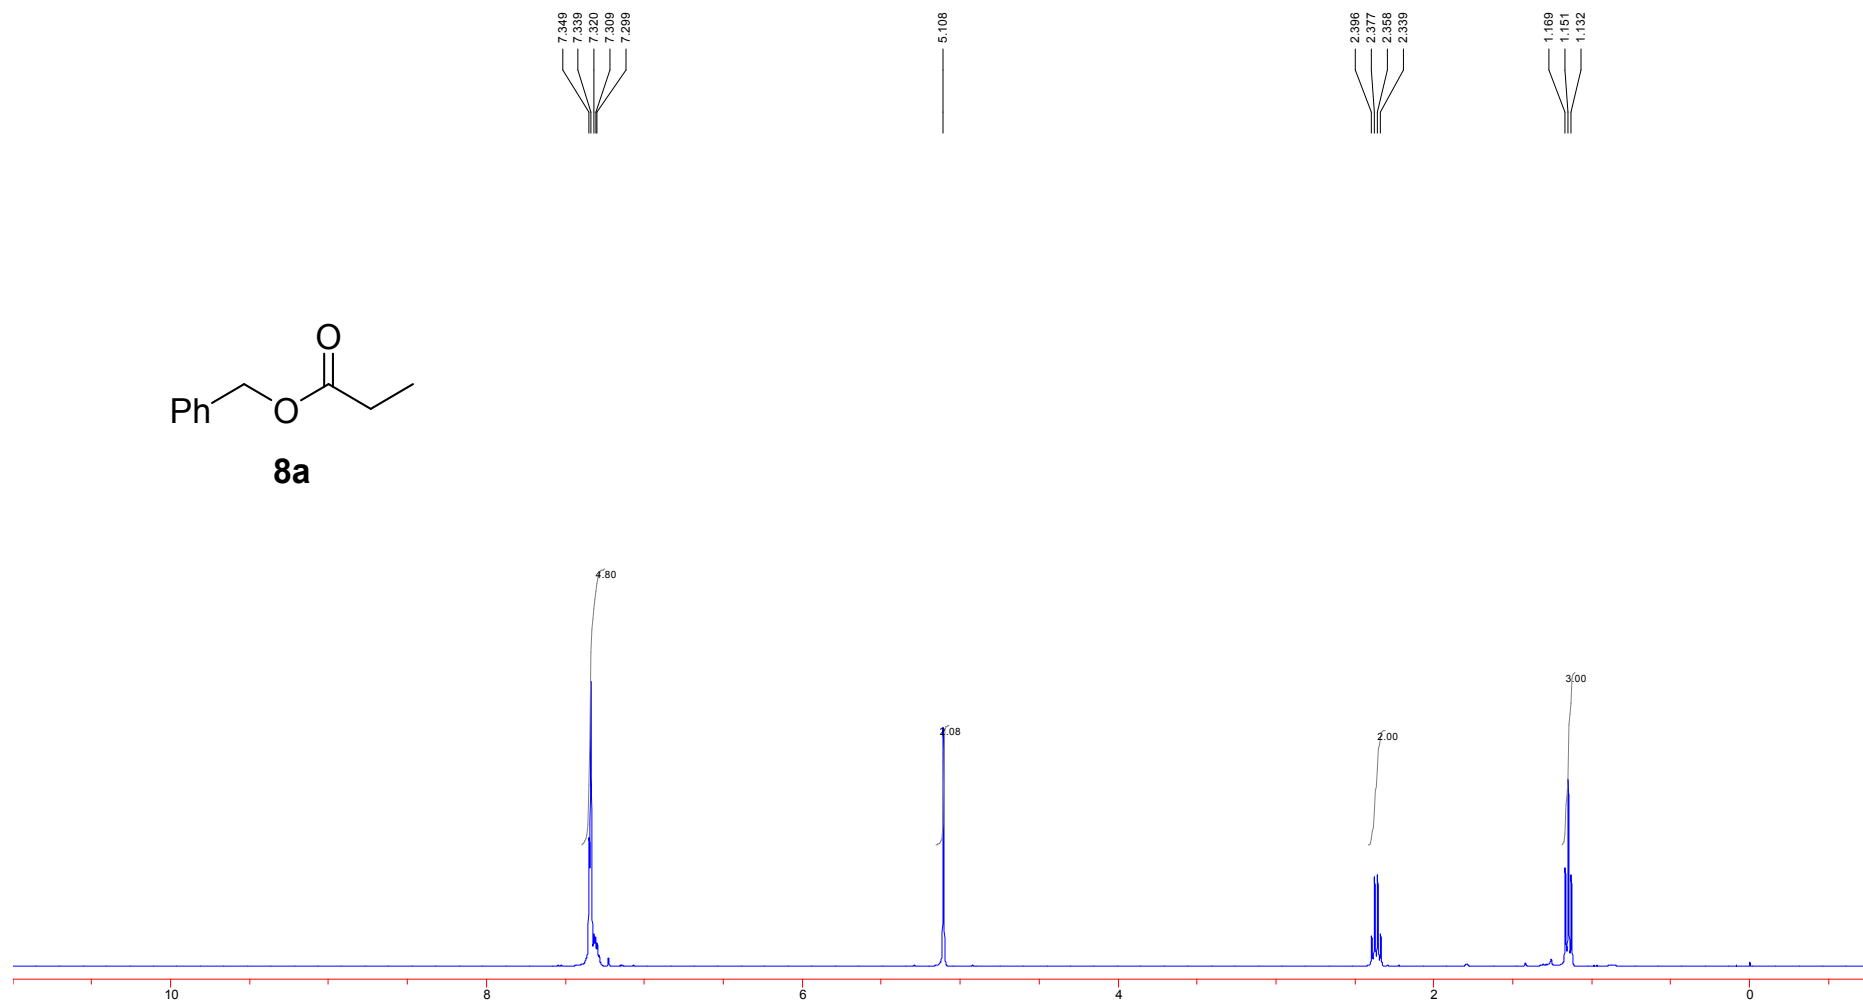

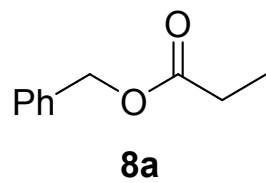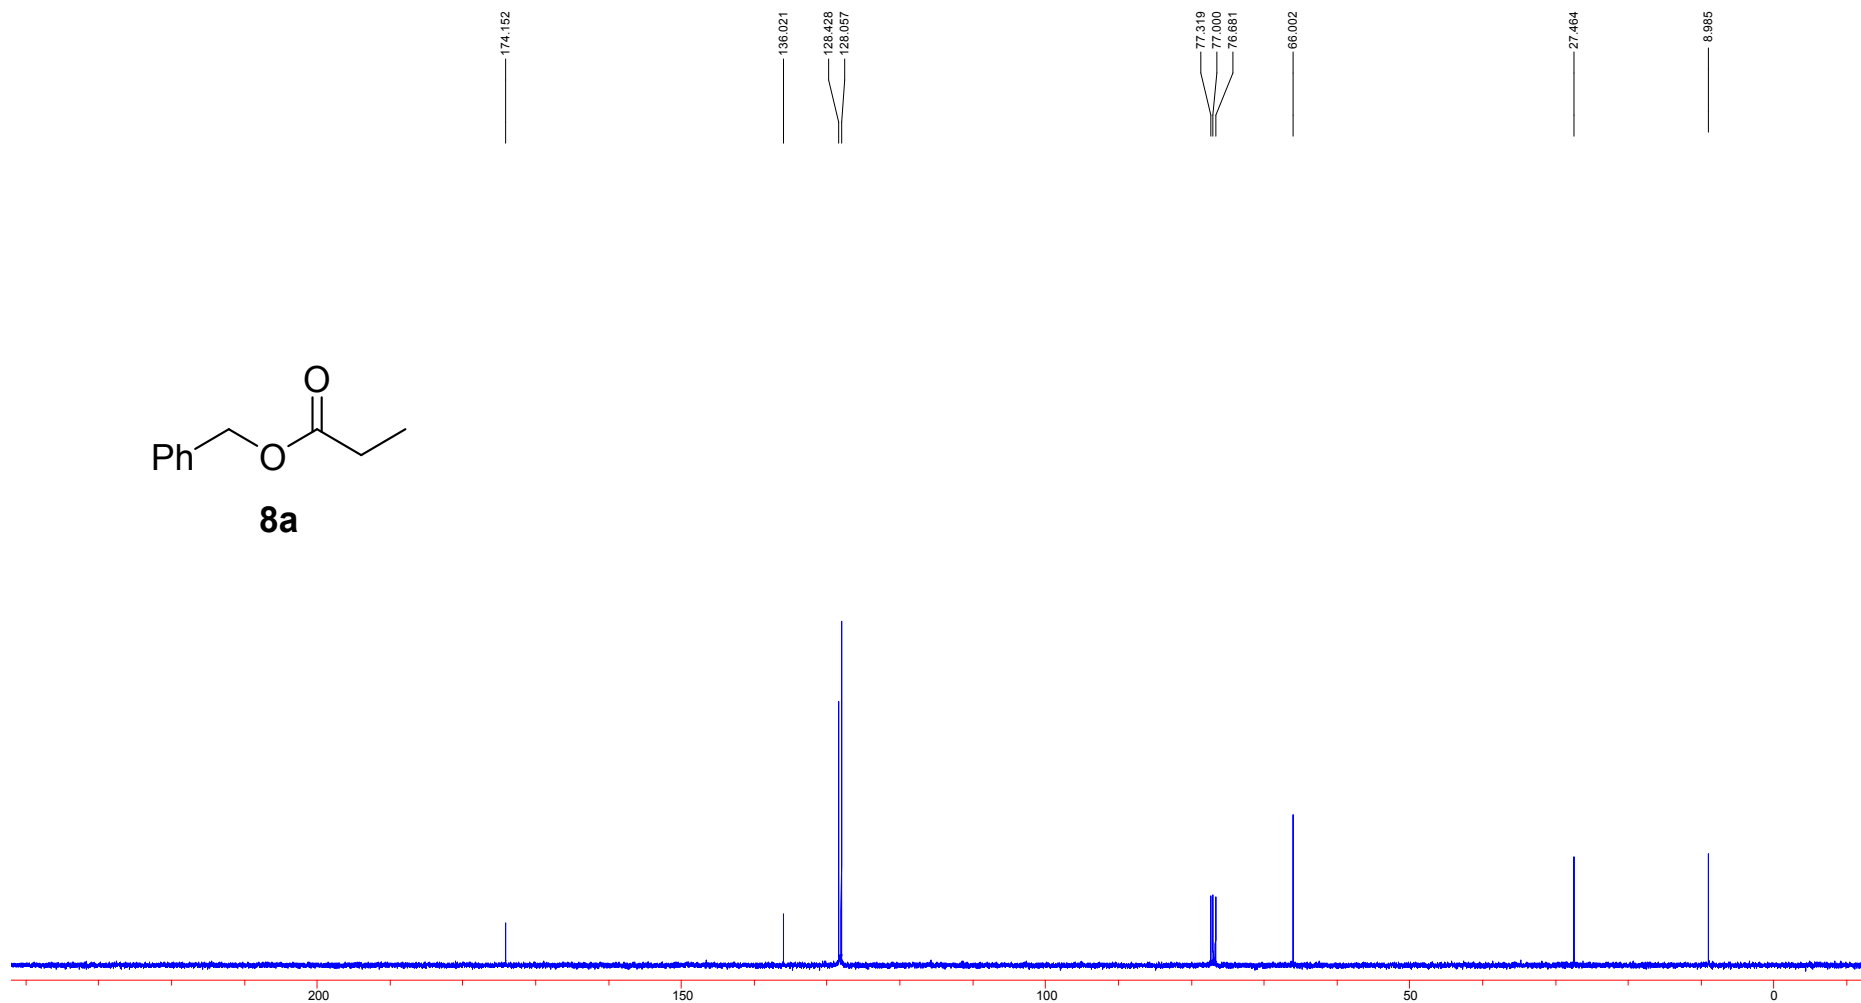

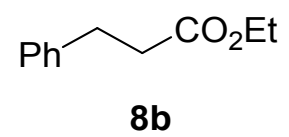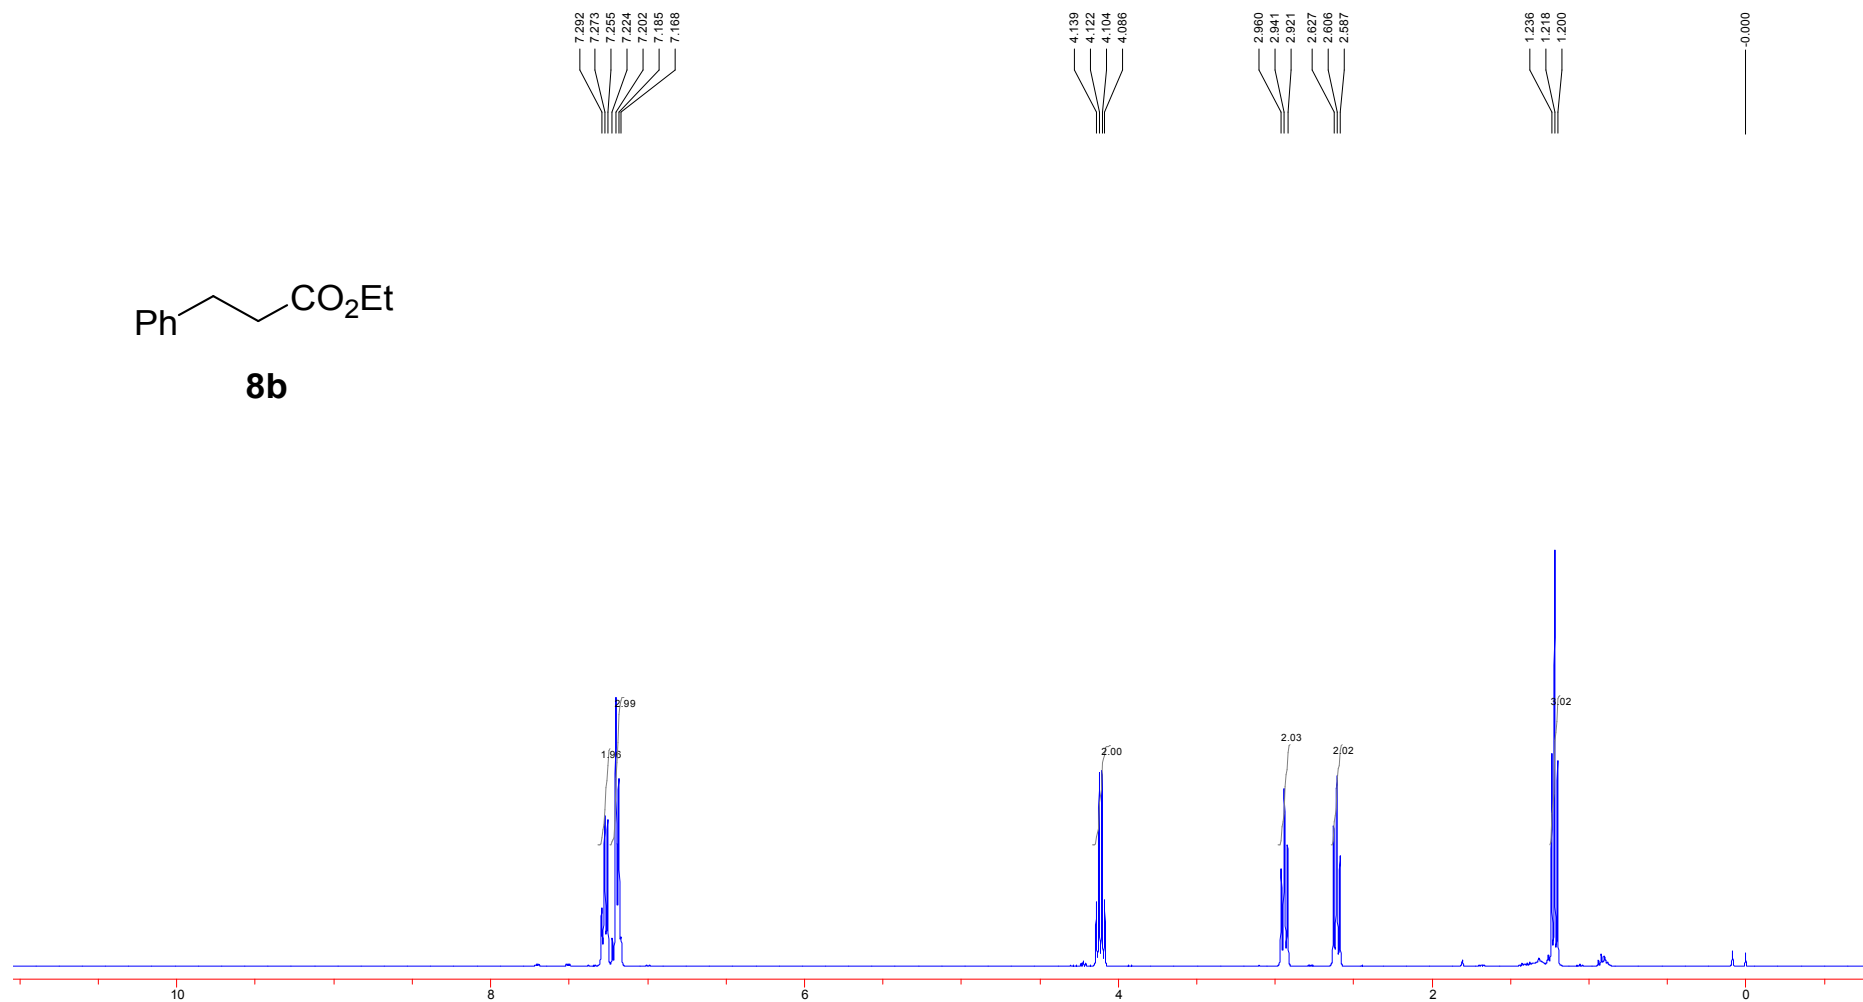

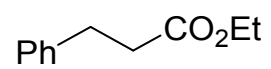

**8b**

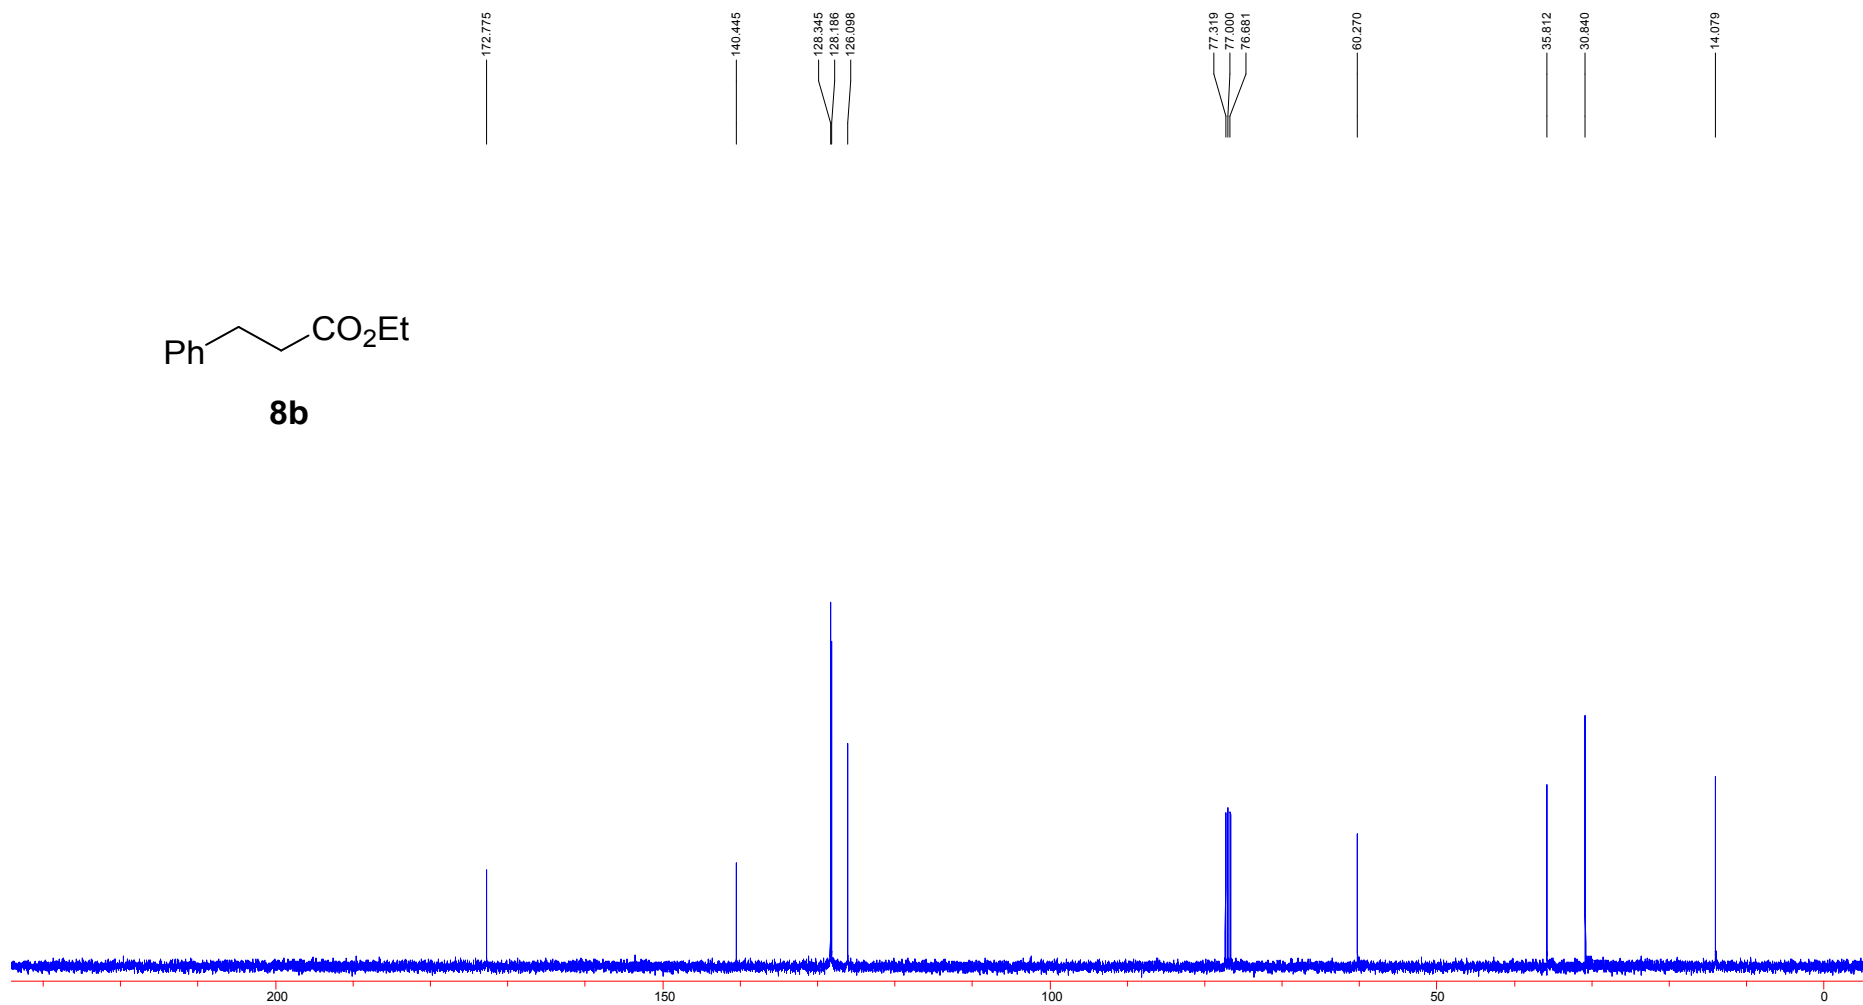

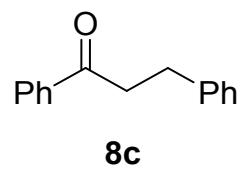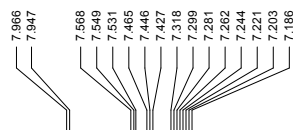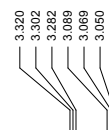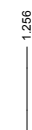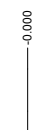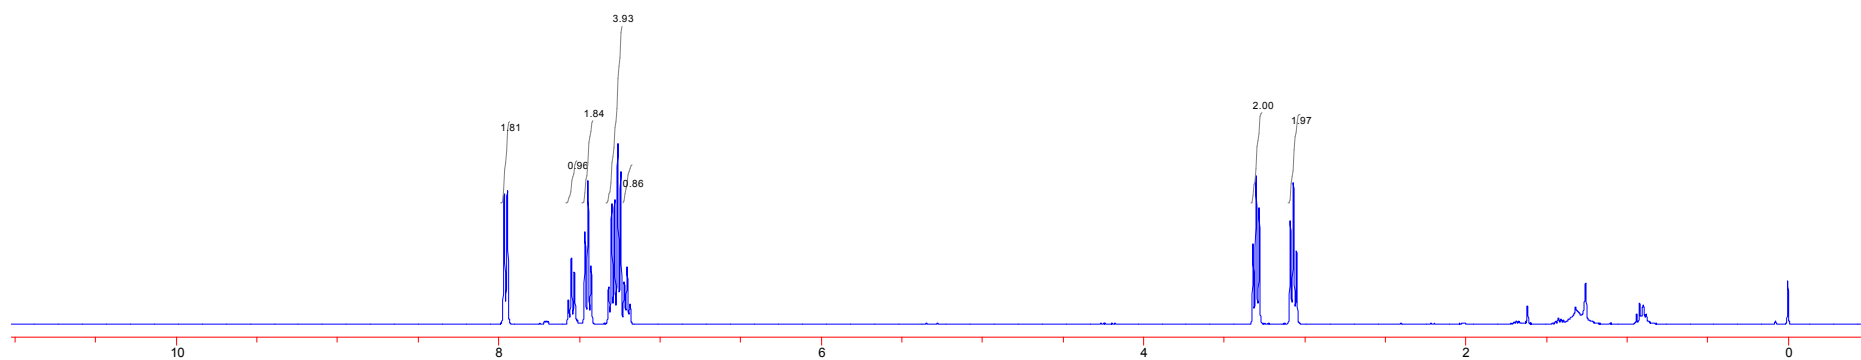

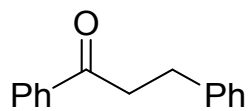

**8c**

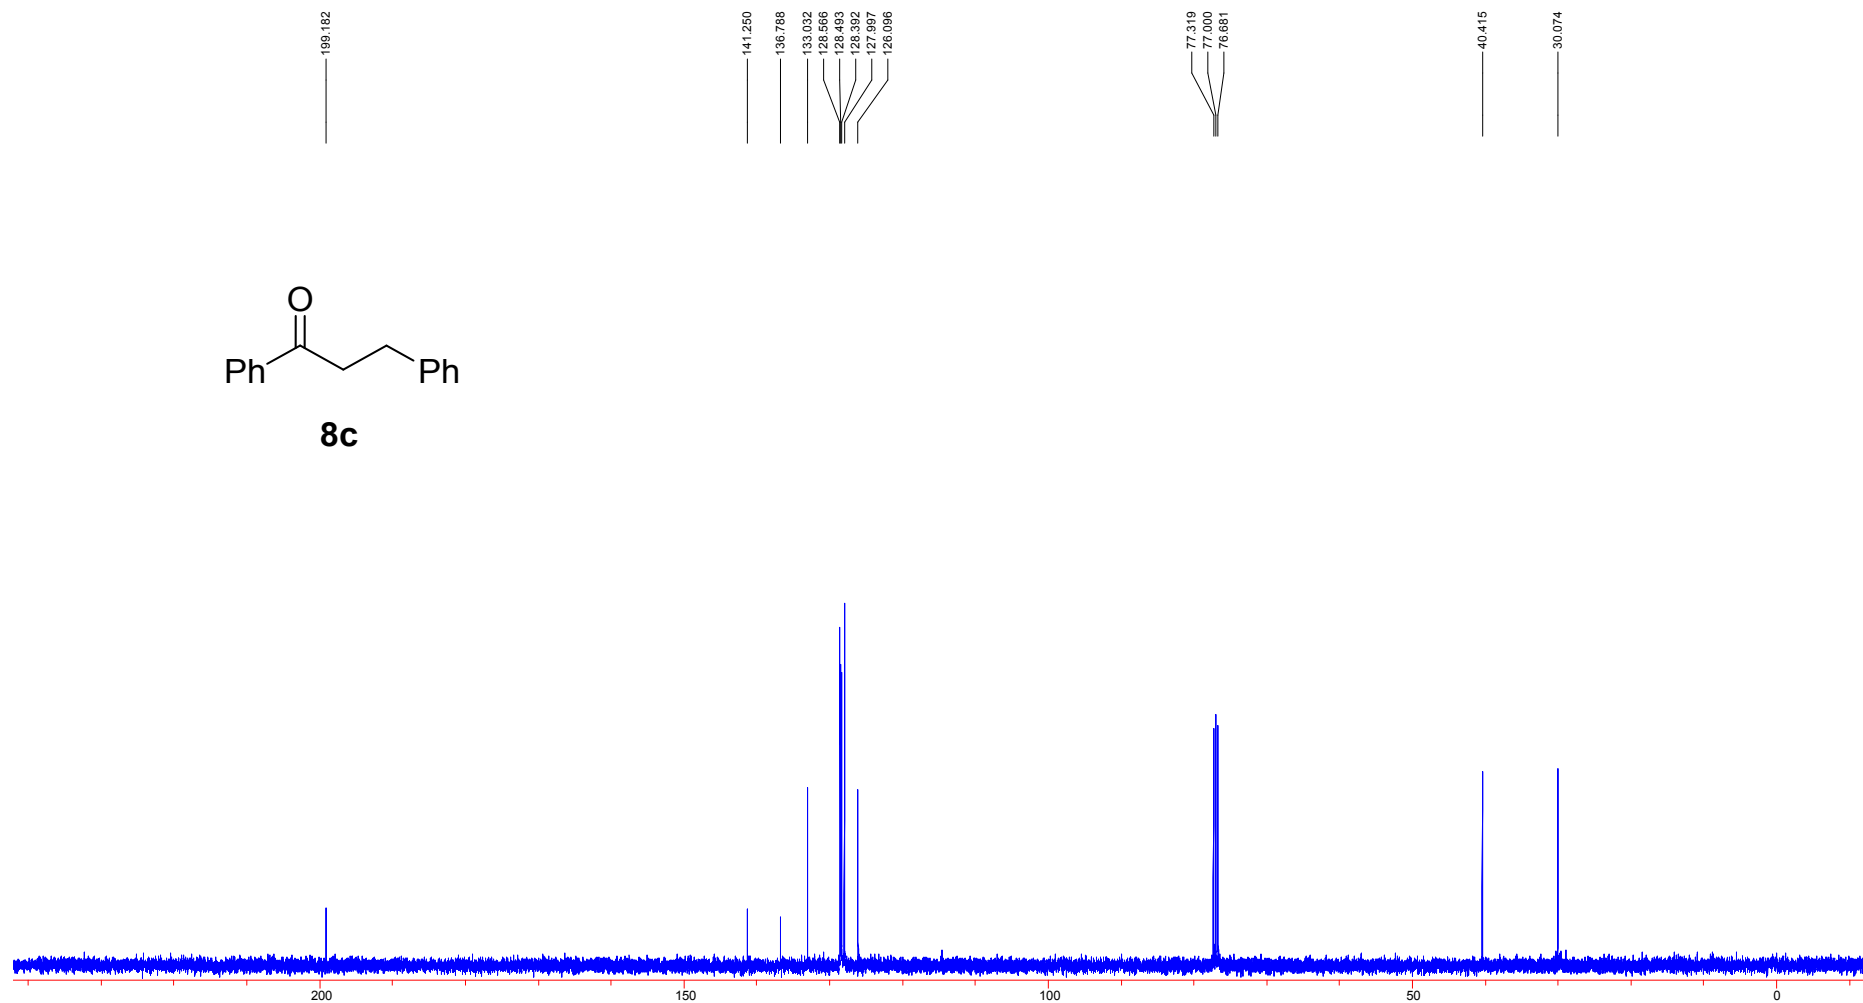

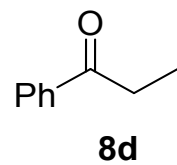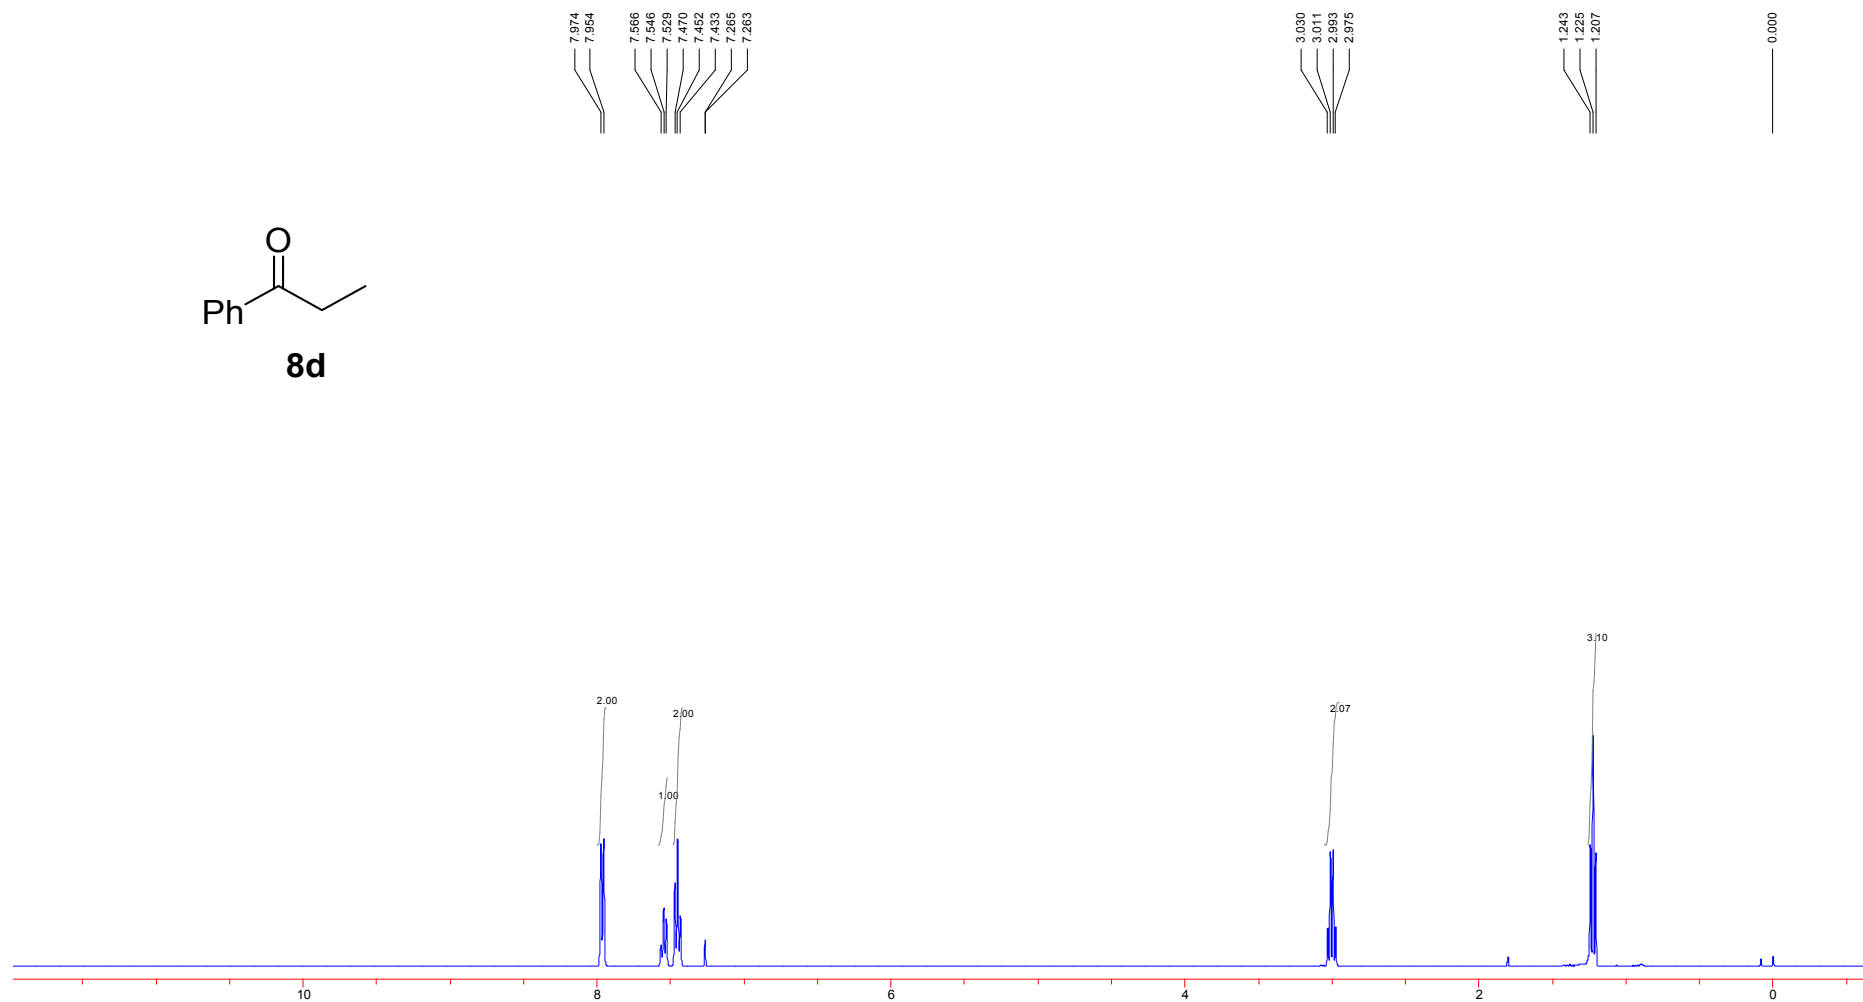

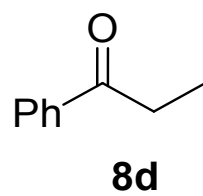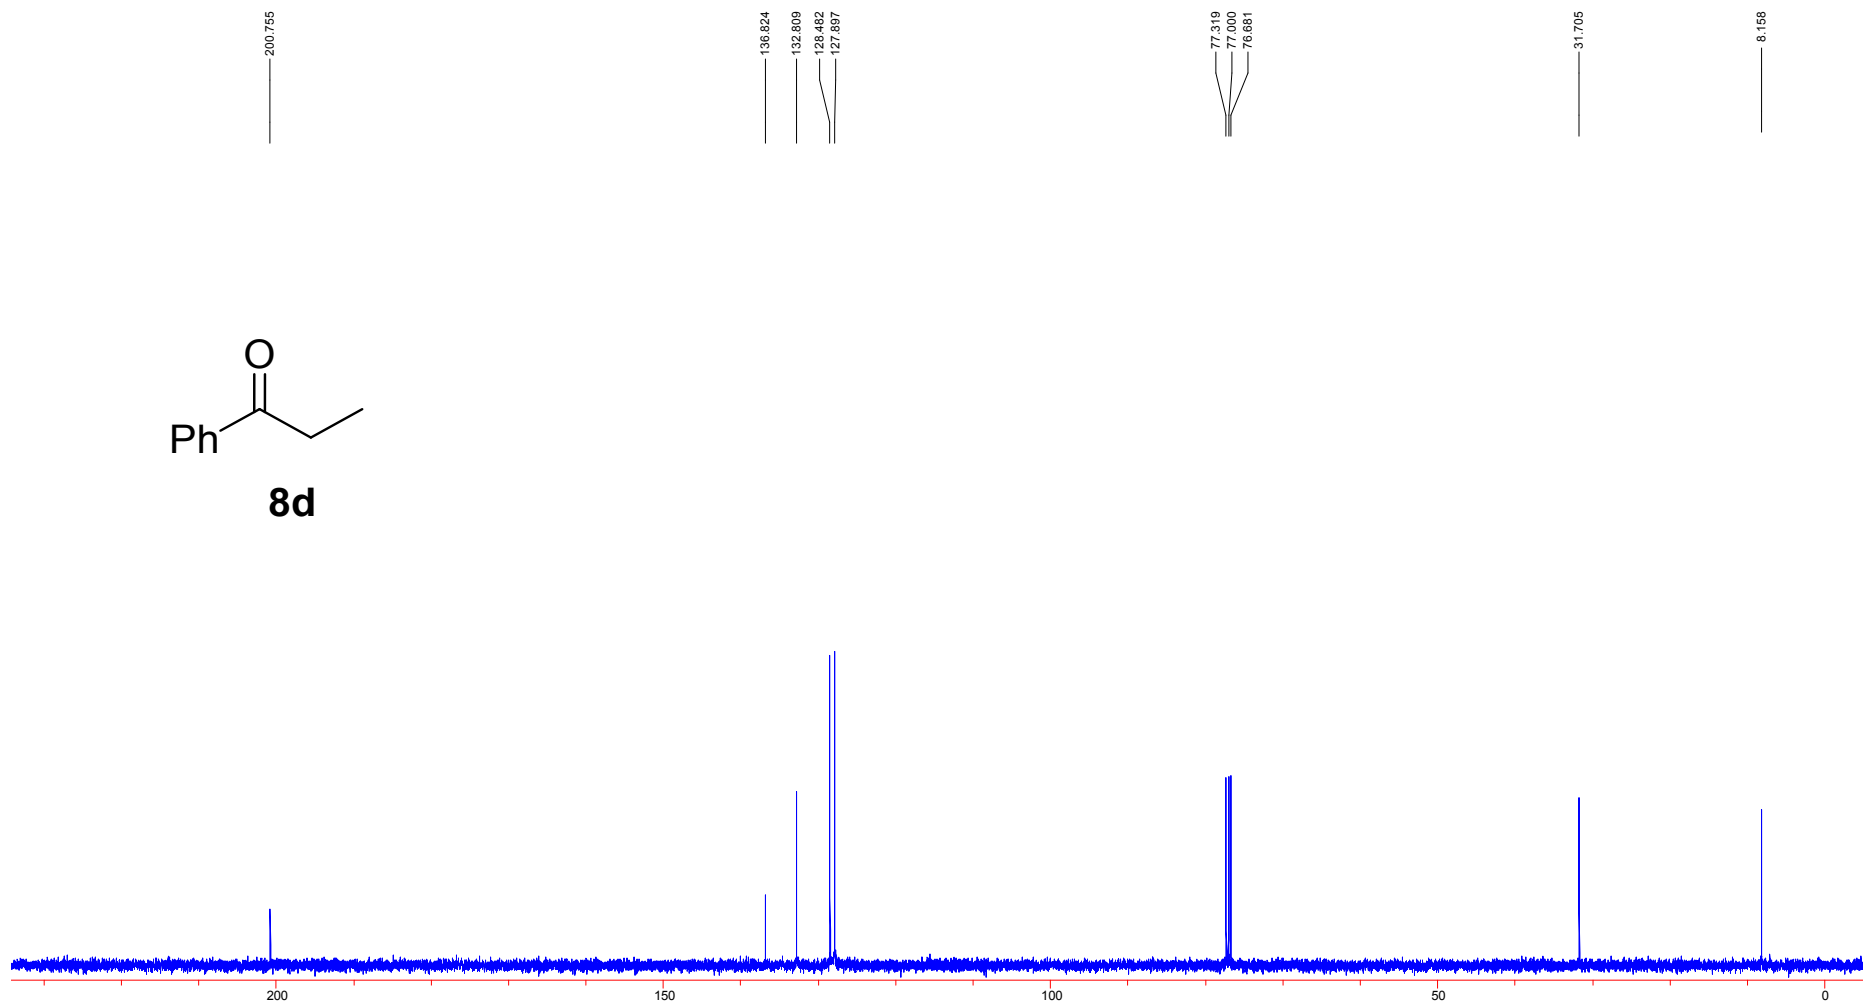

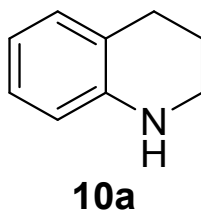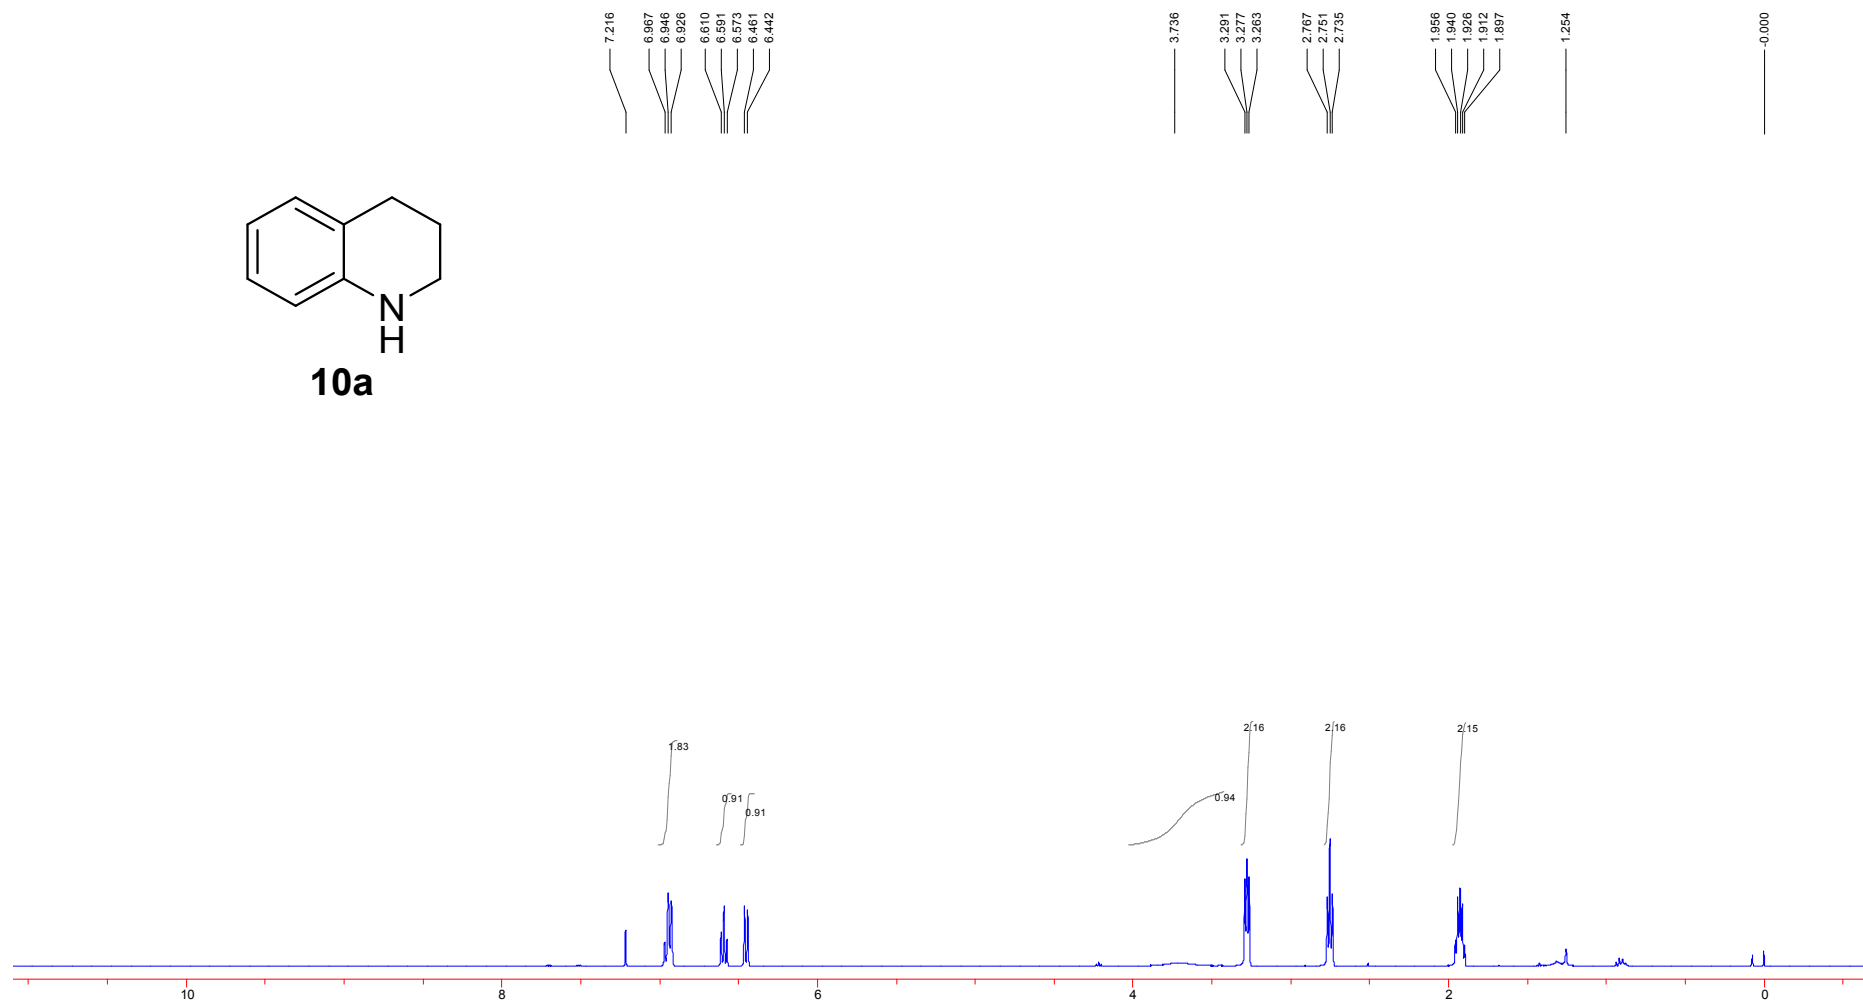

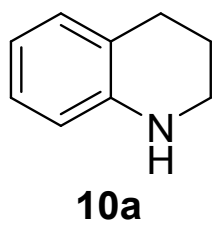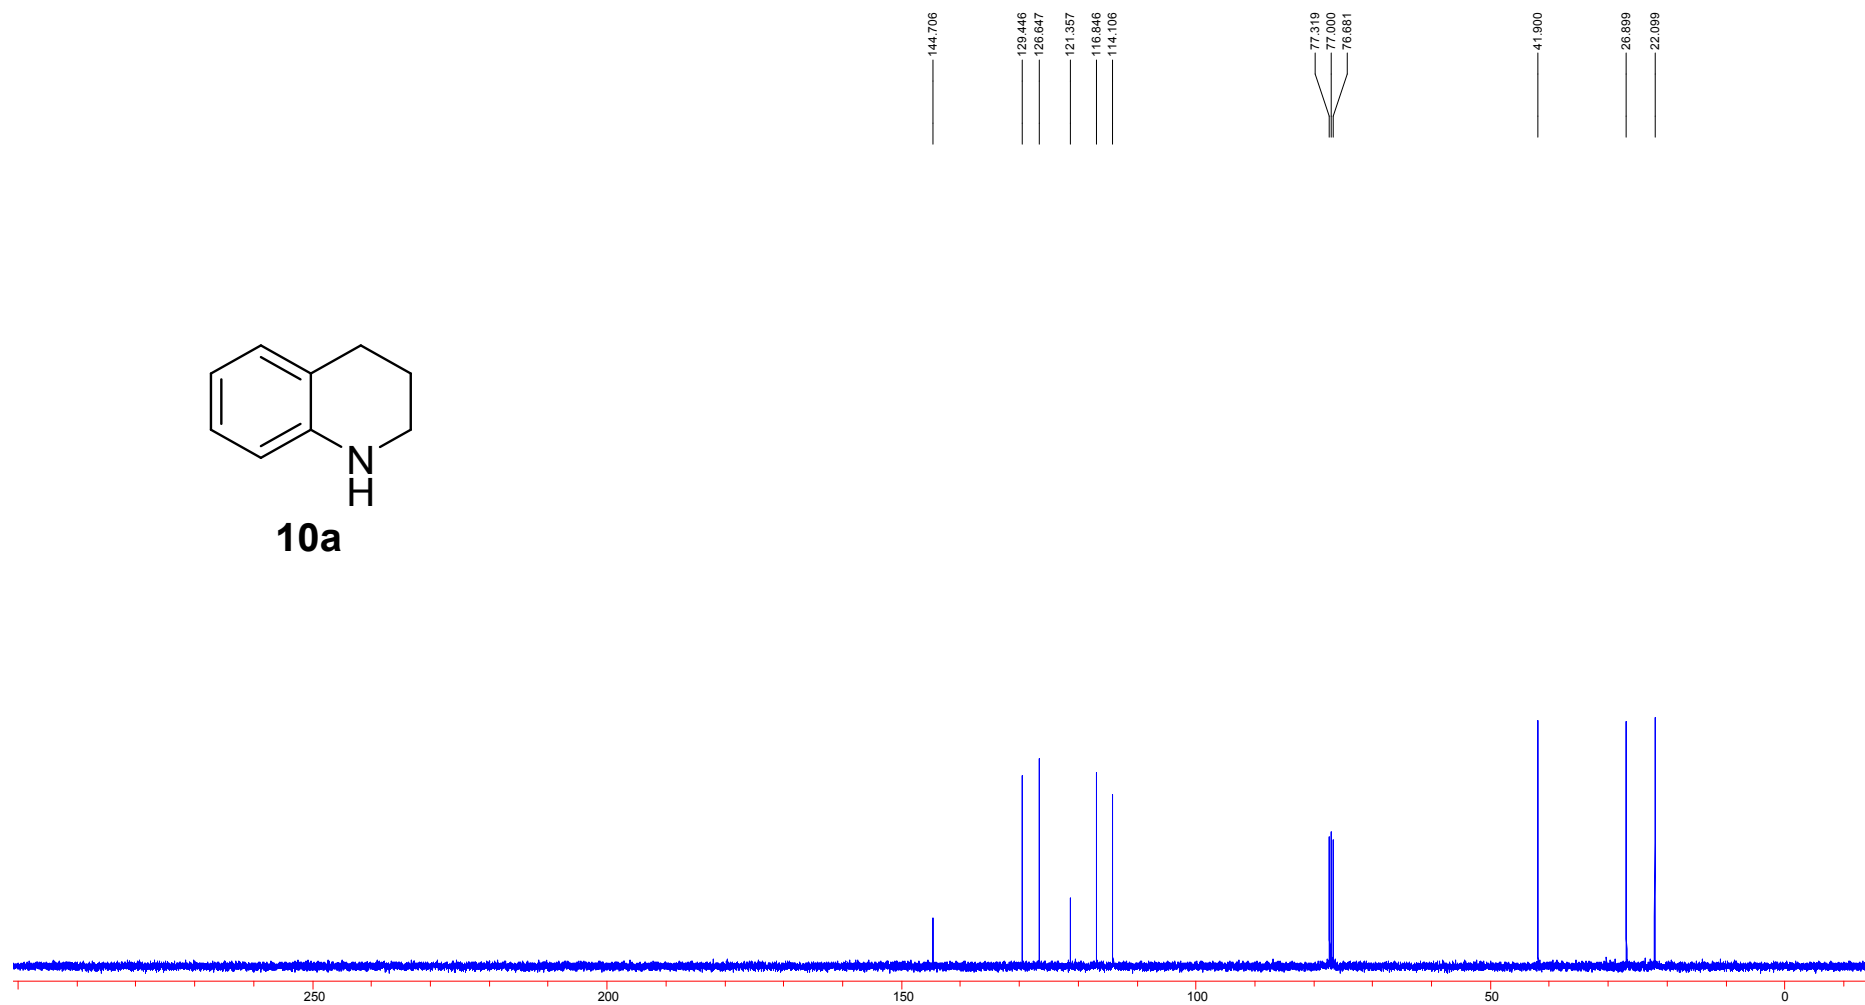

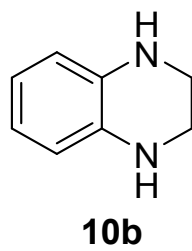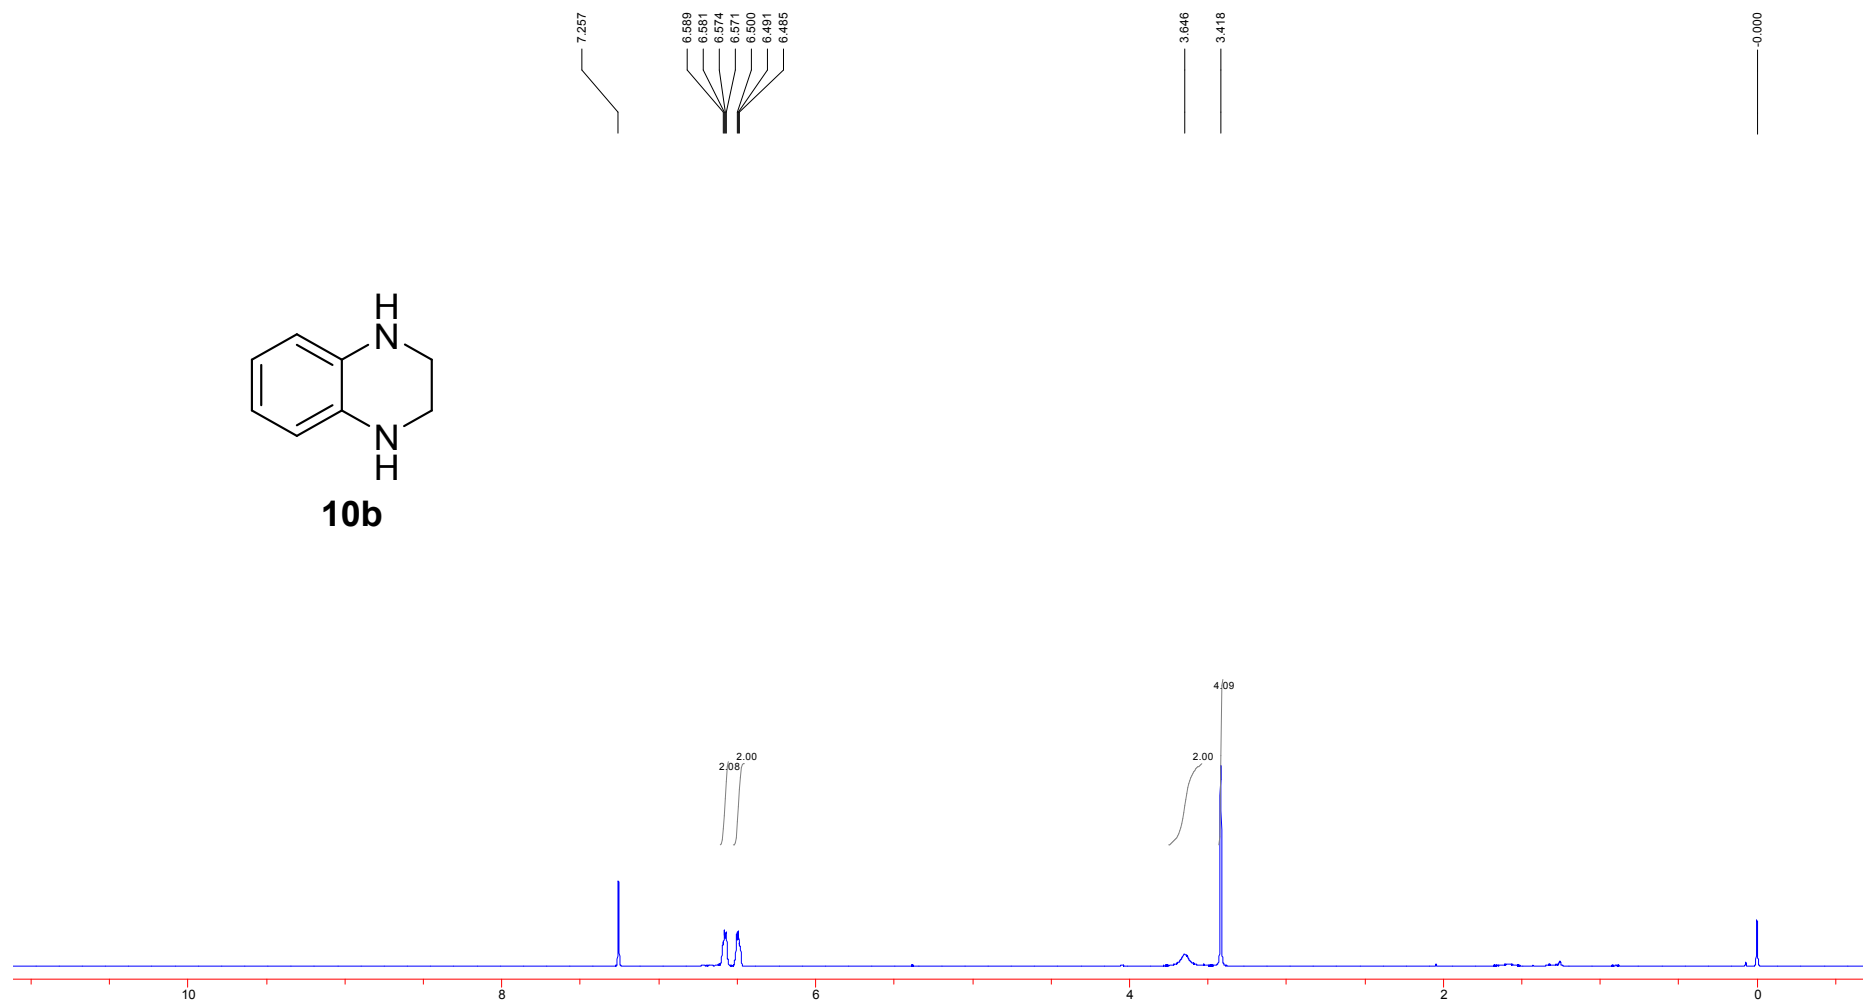

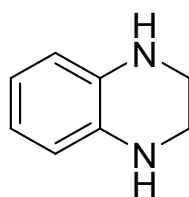

**10b**

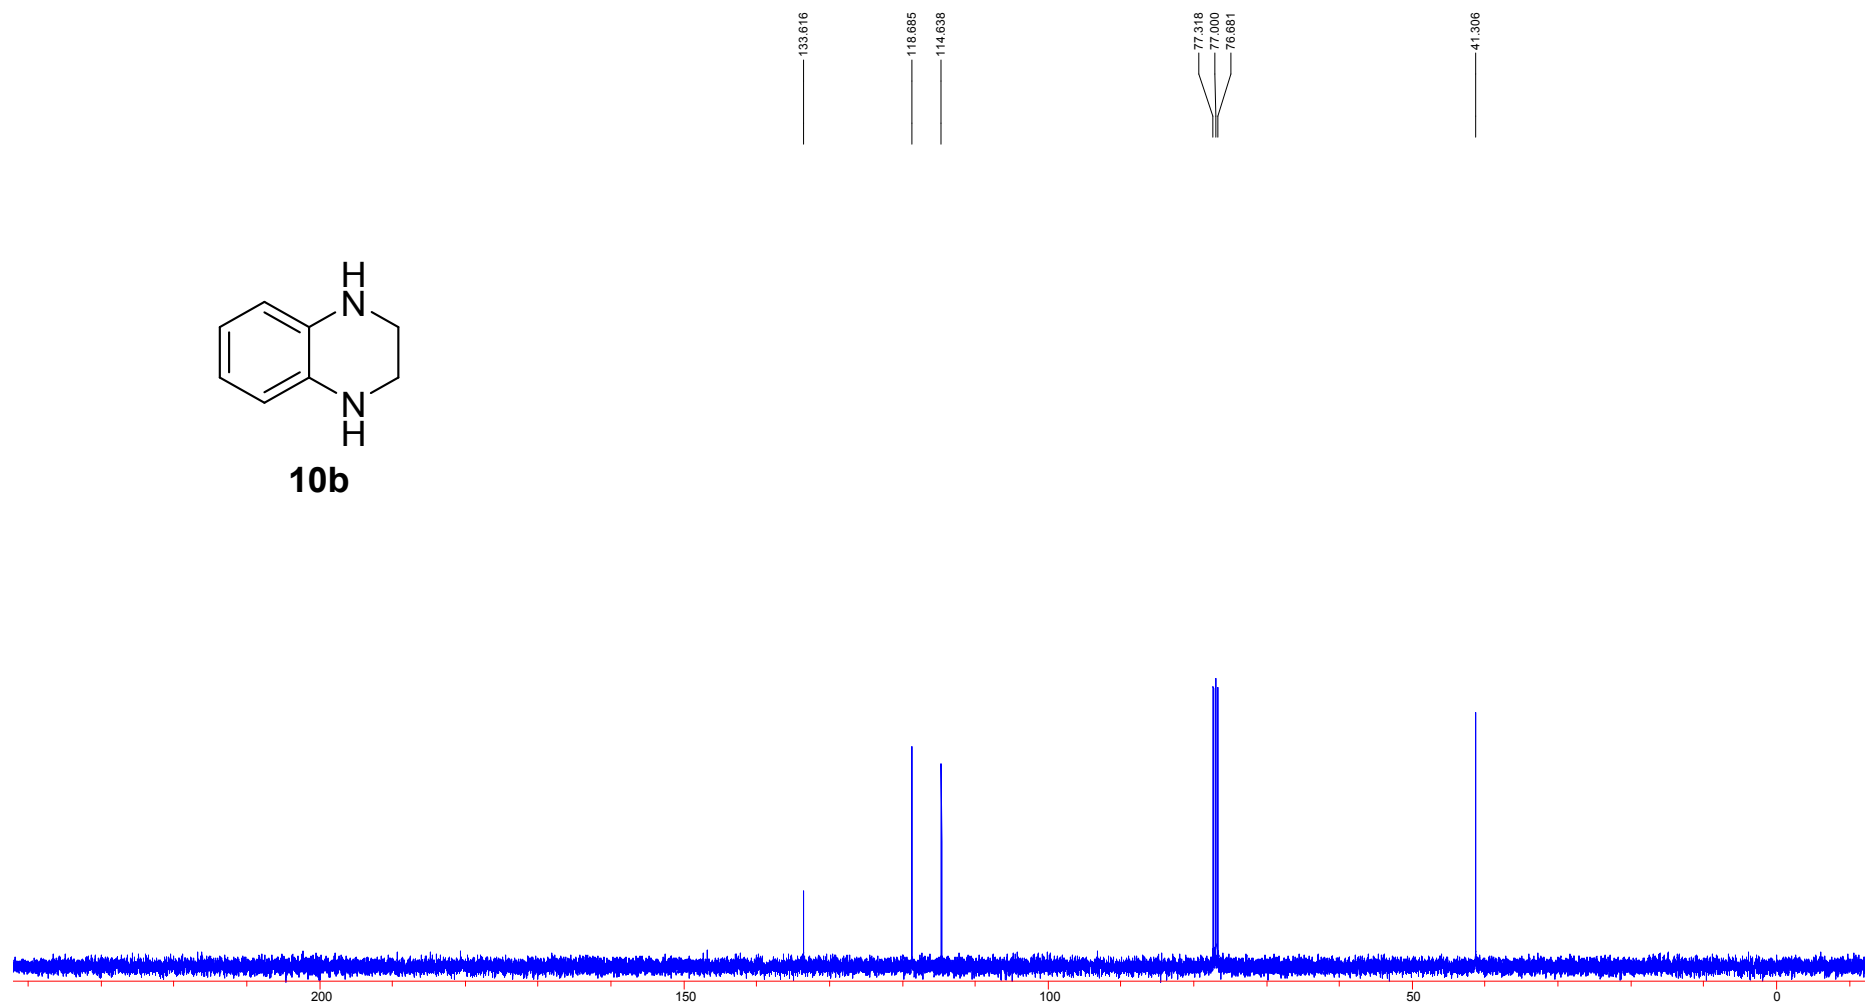

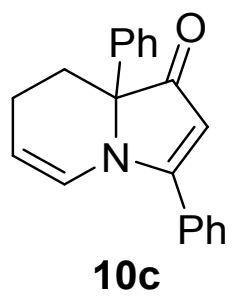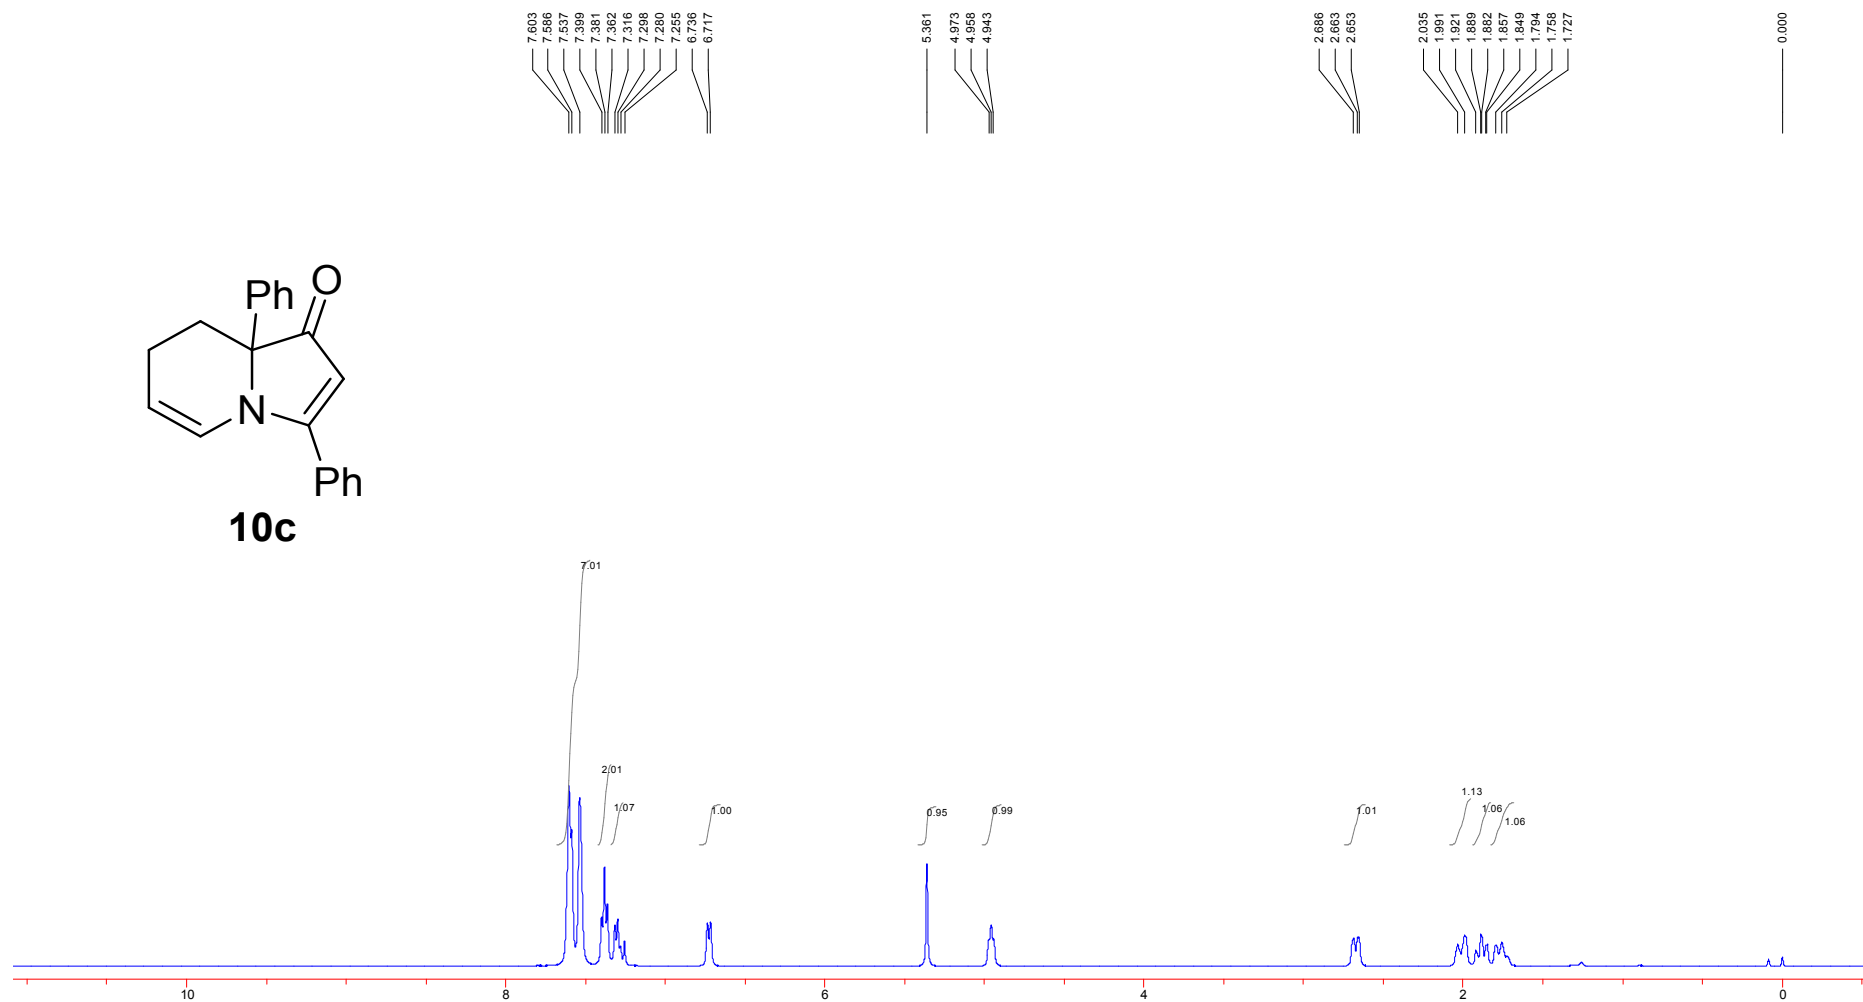

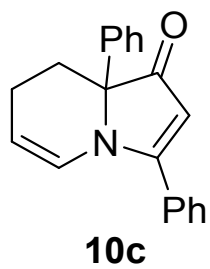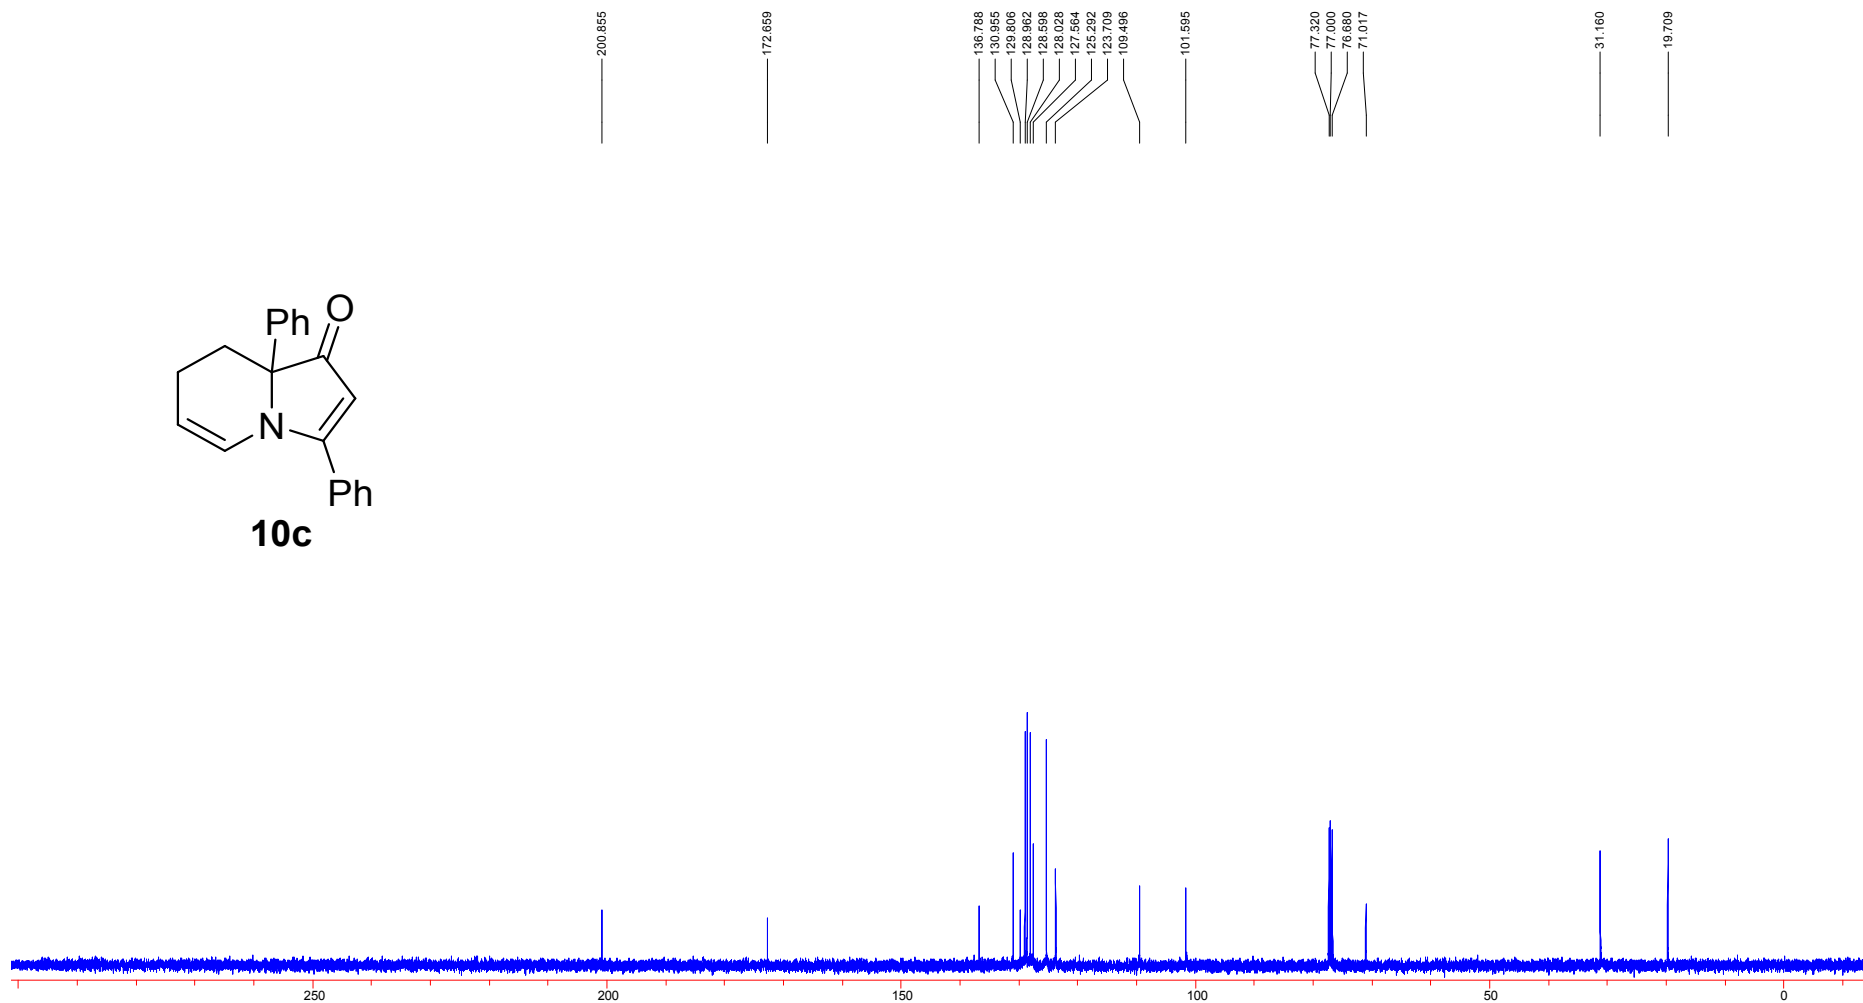

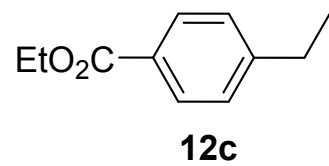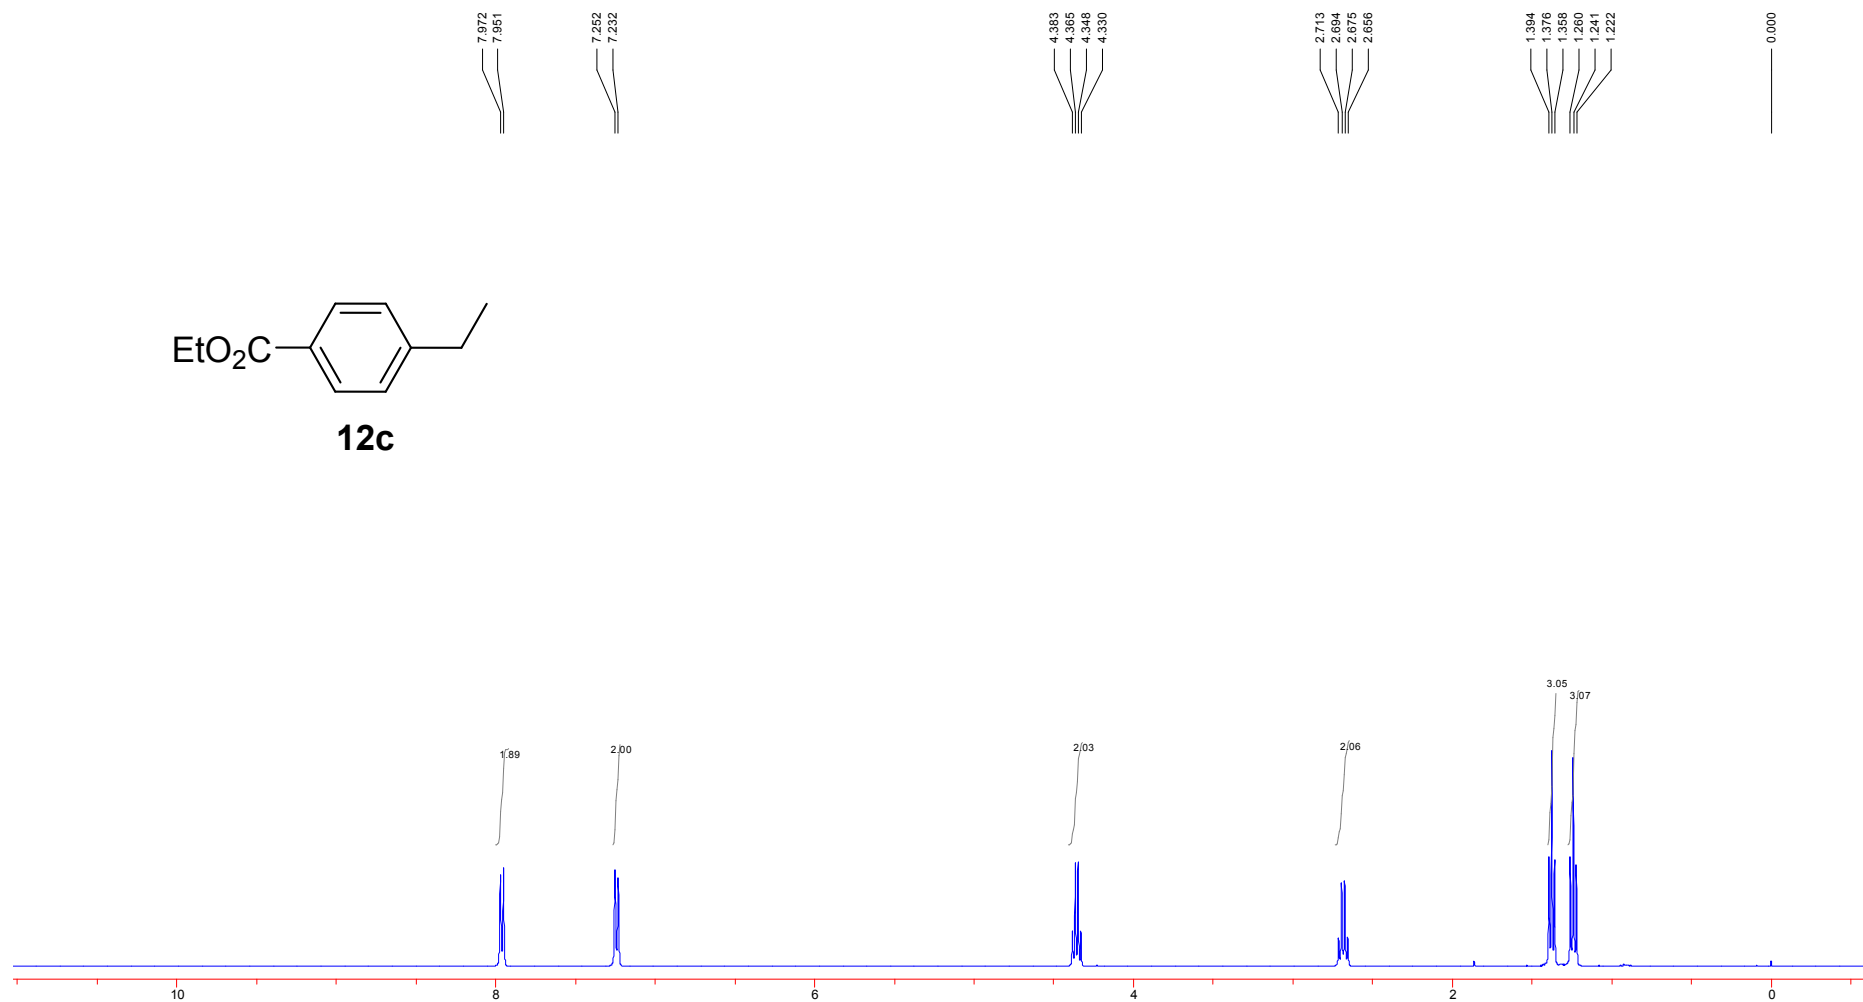

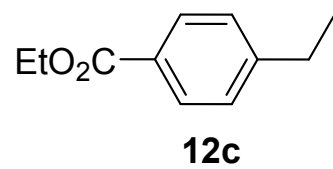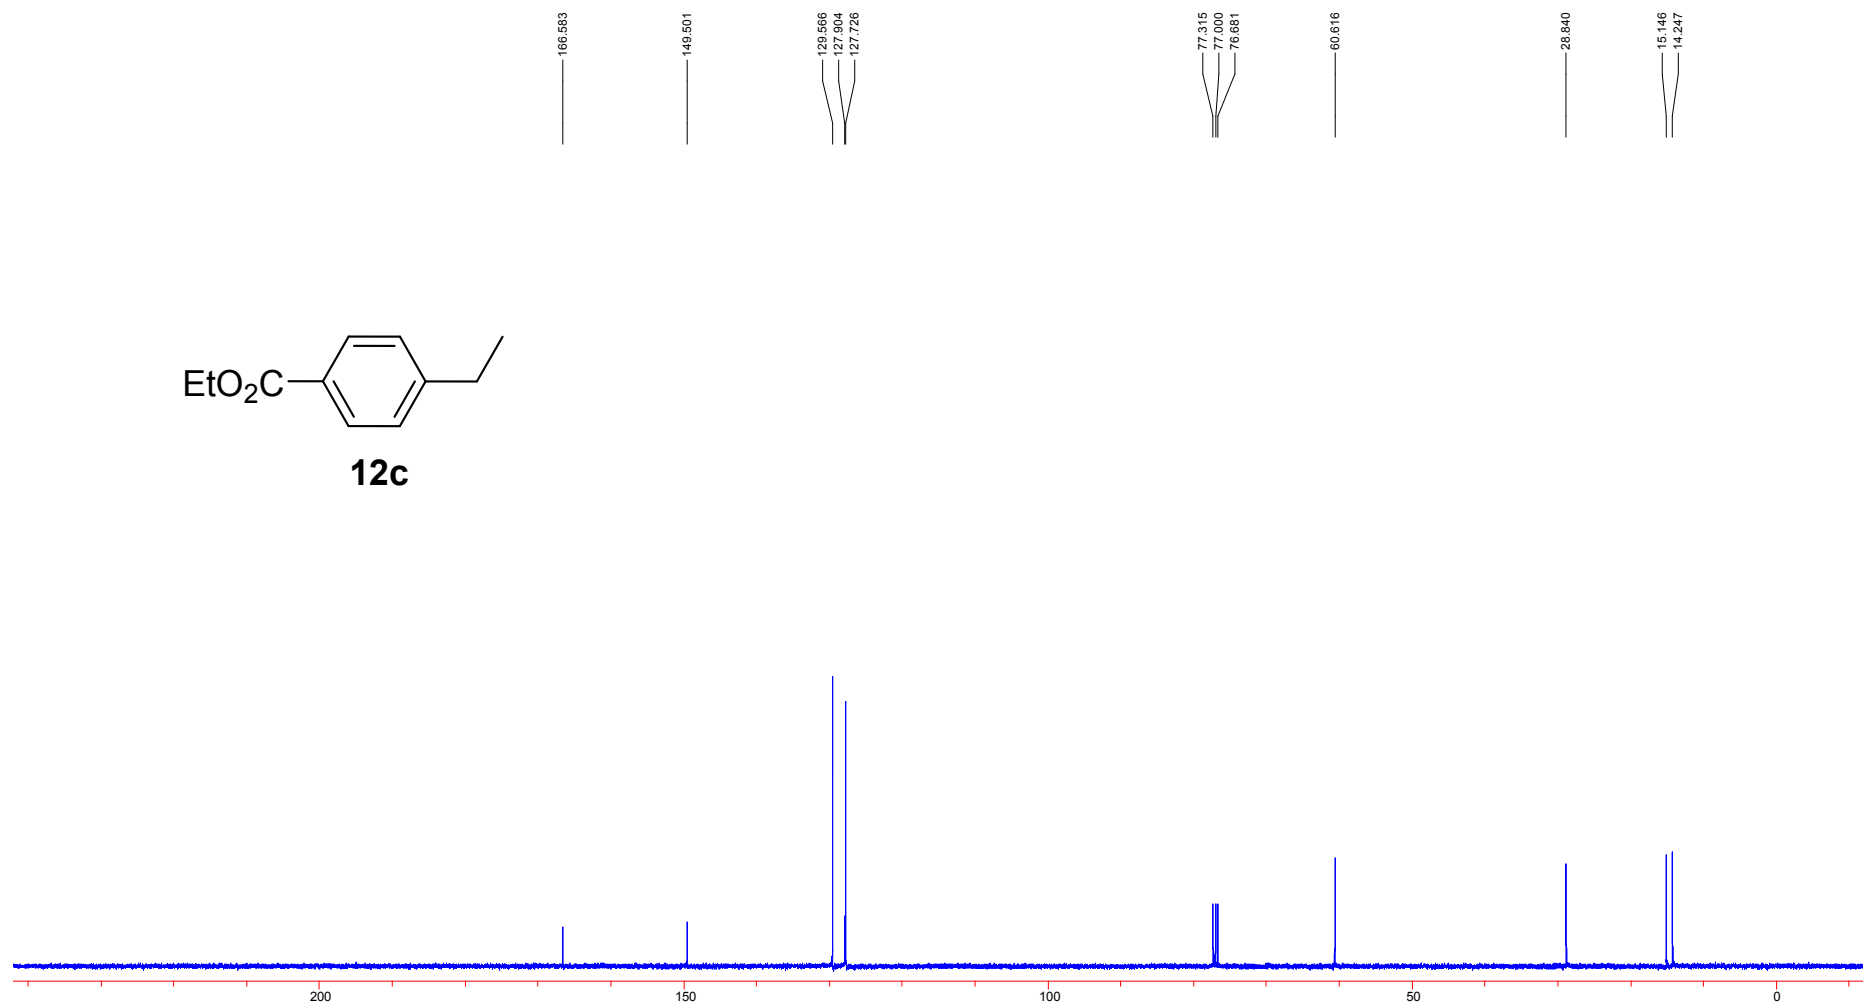

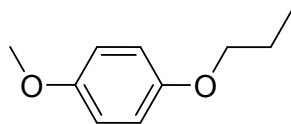

**12f**

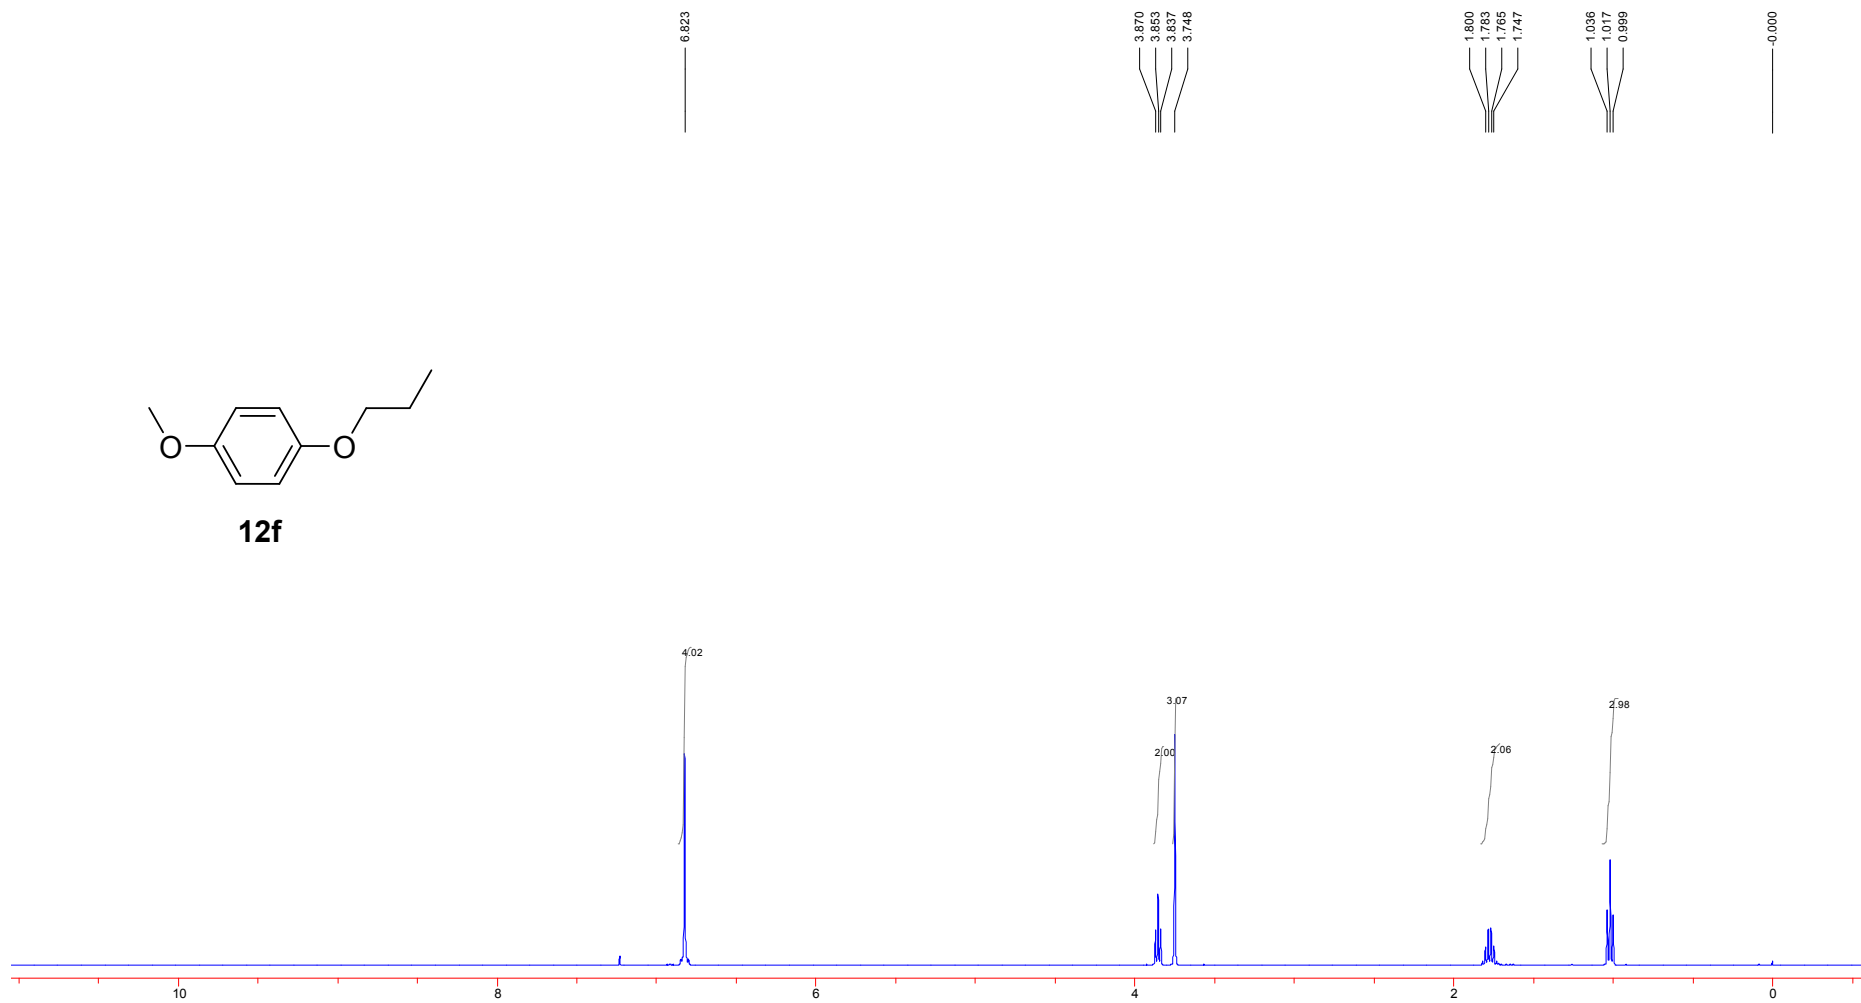

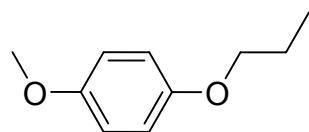

**12f**

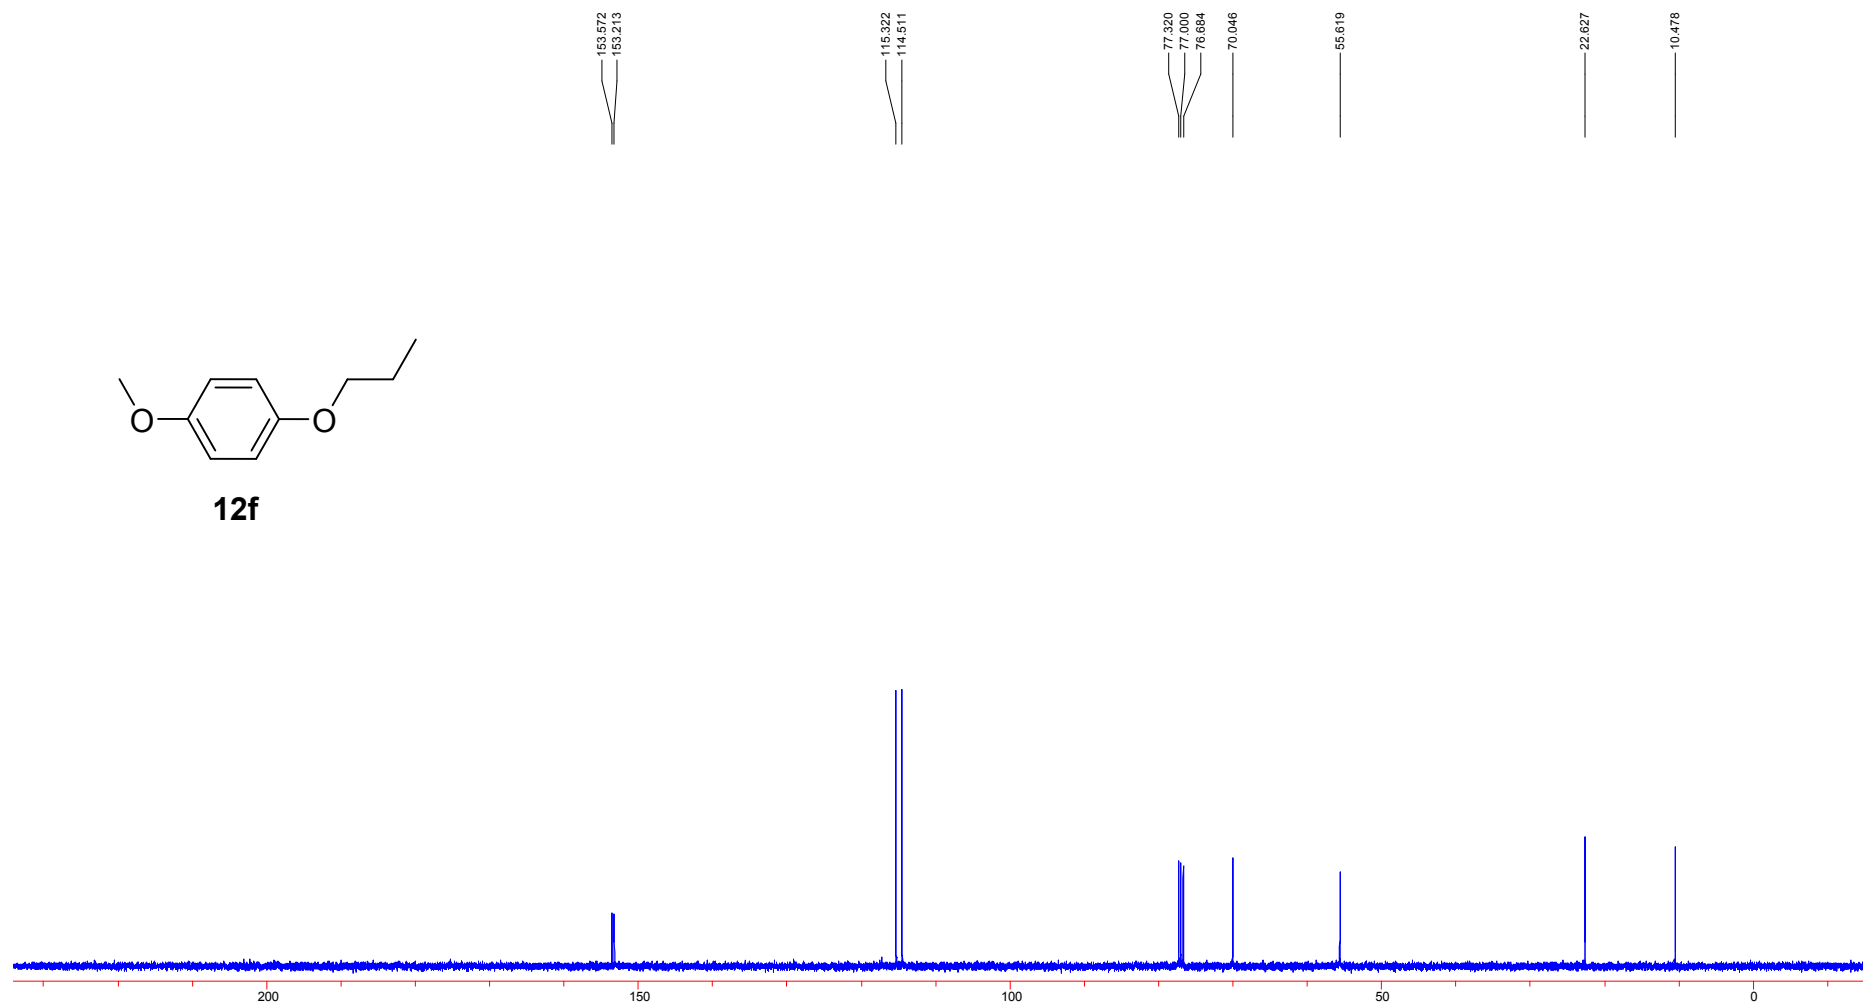

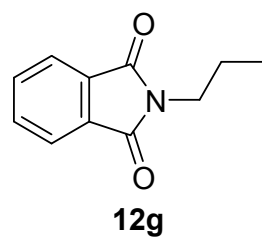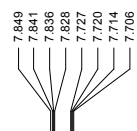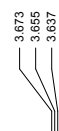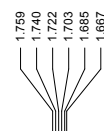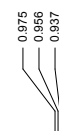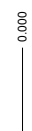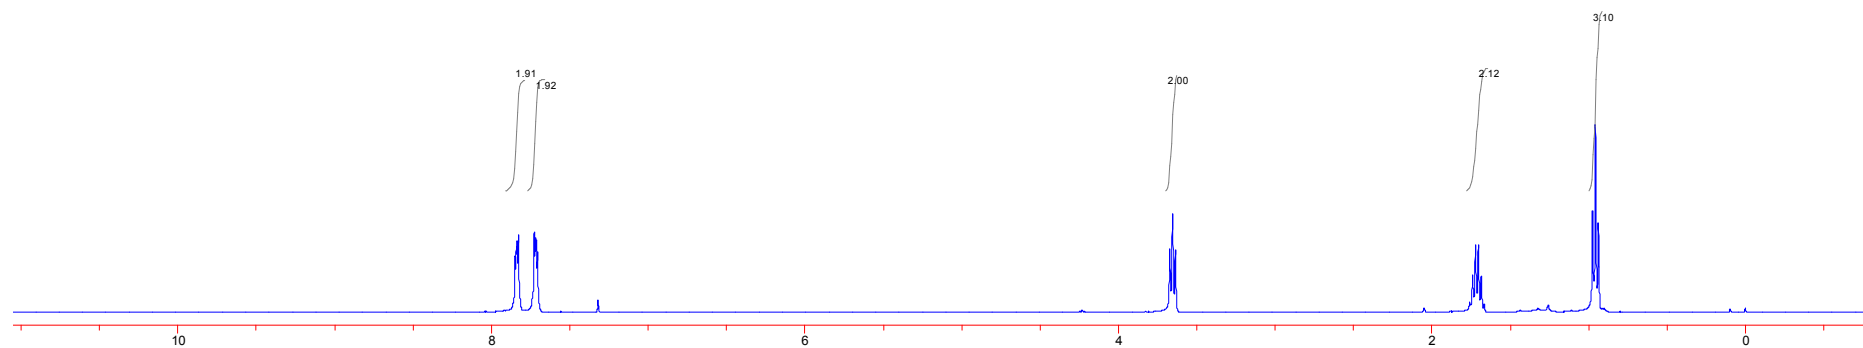

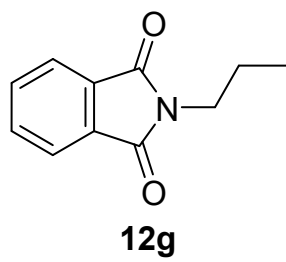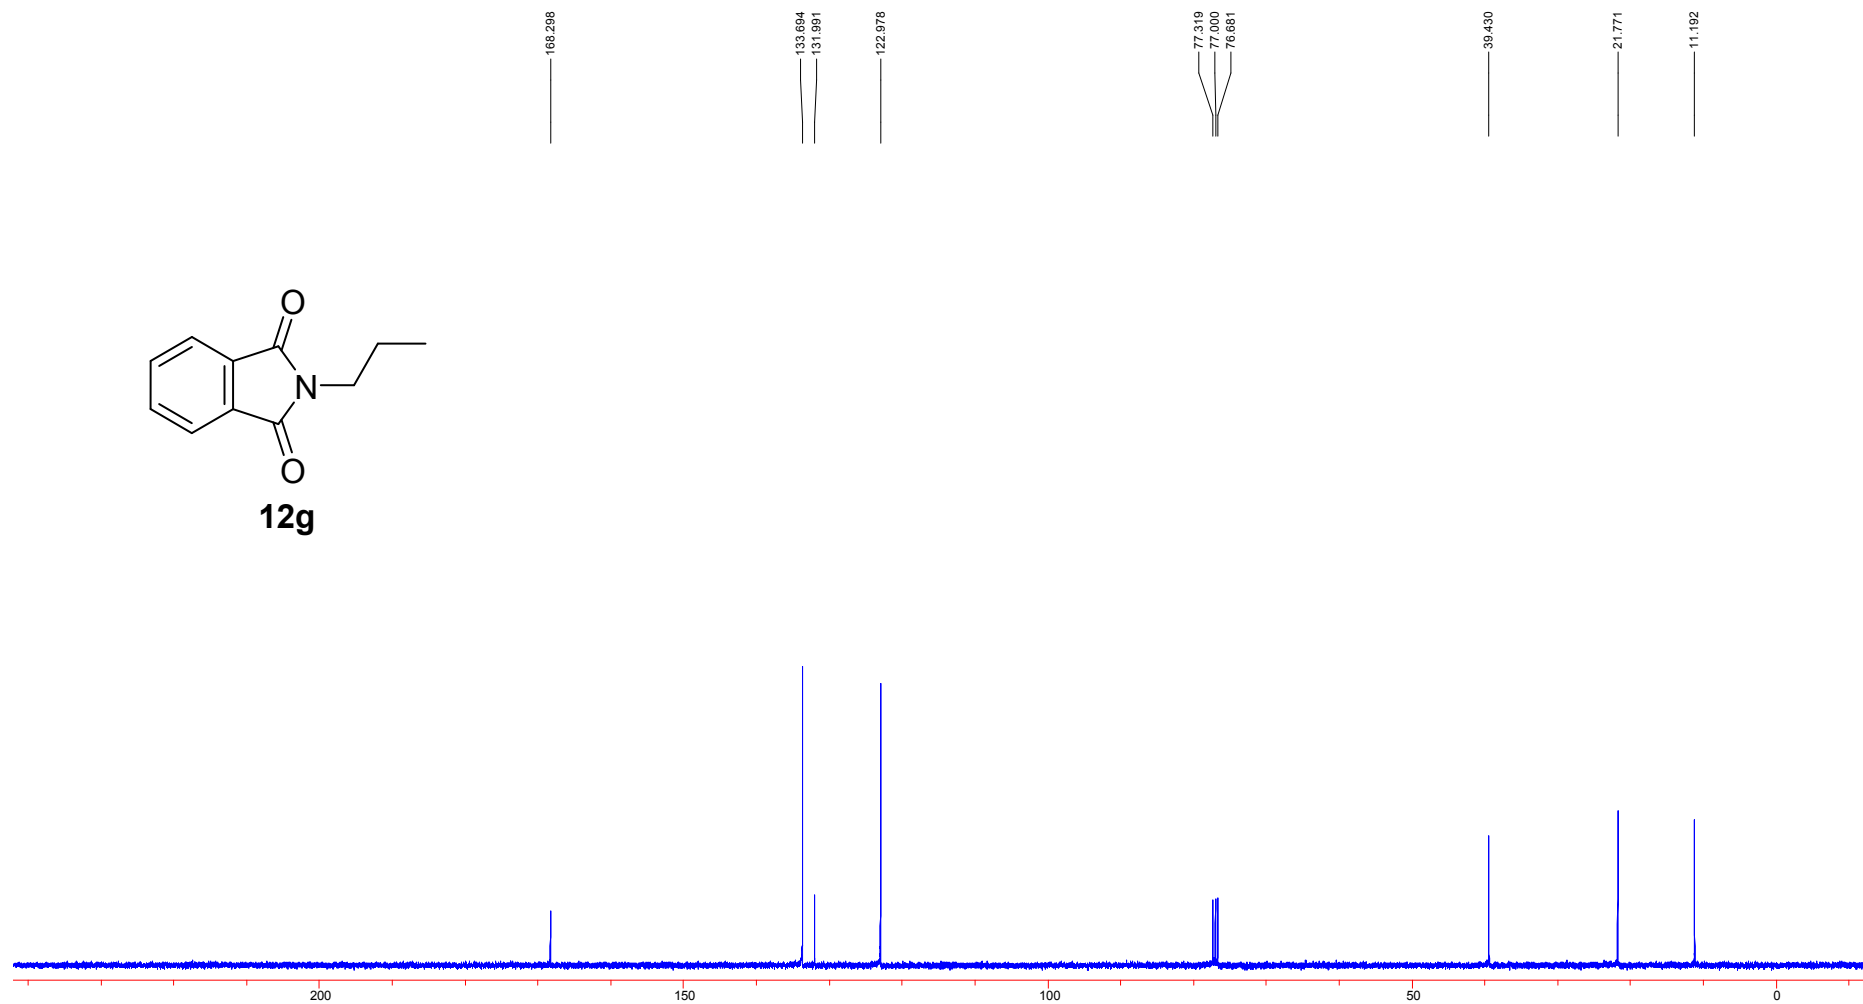

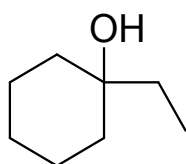

**12h**

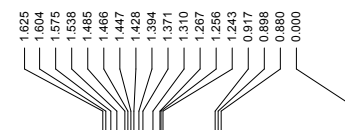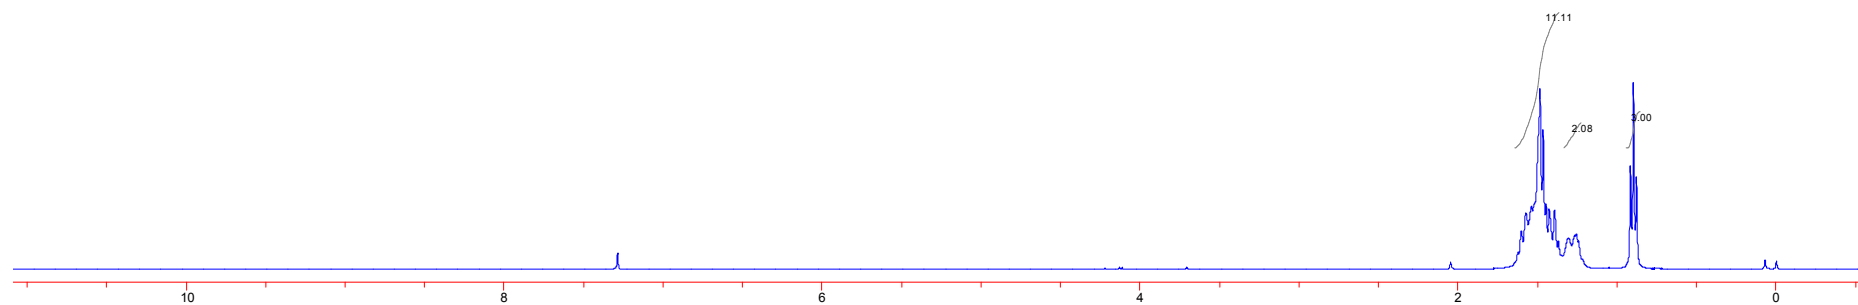

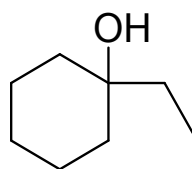

12h

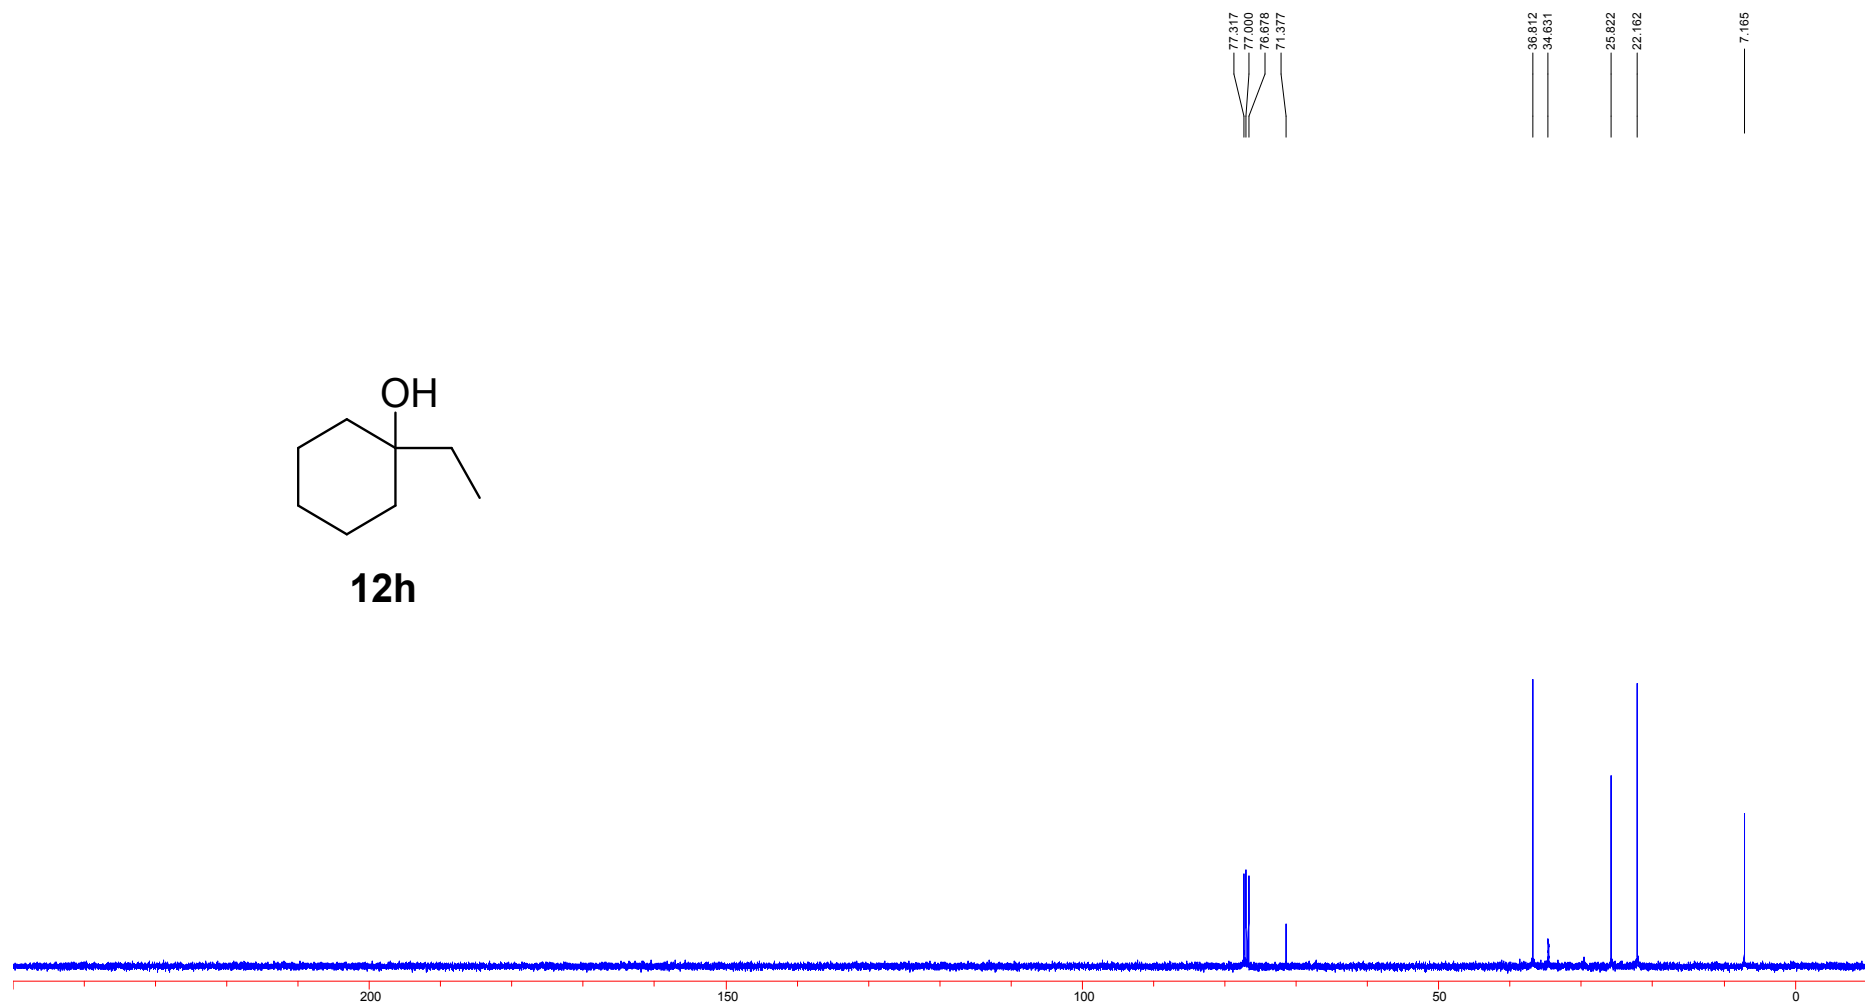

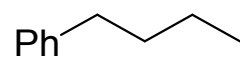

**12i**

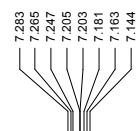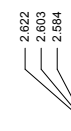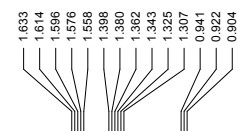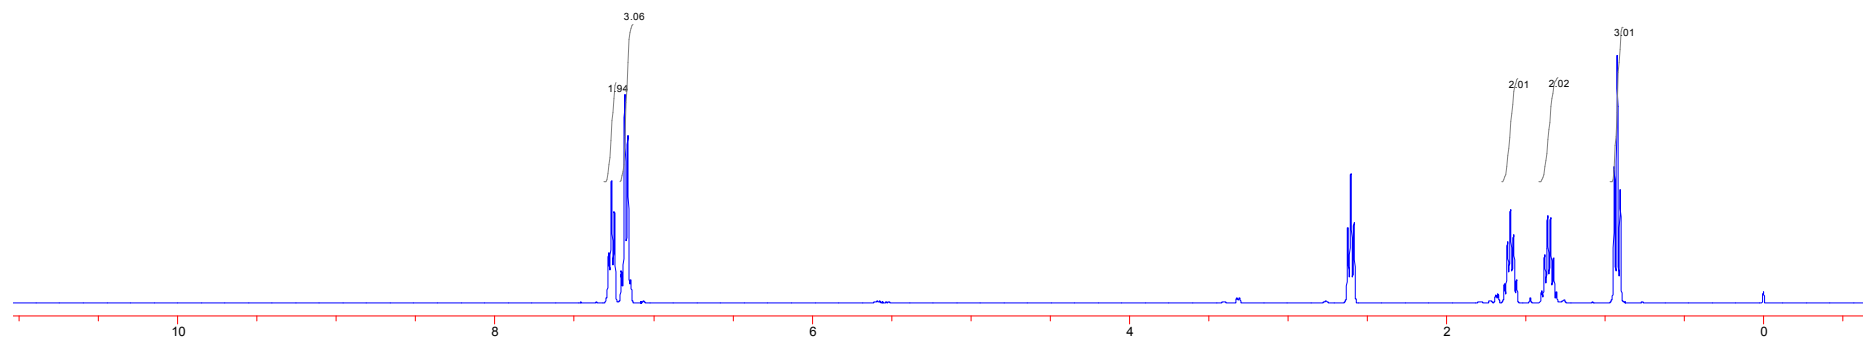

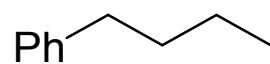

**12i**

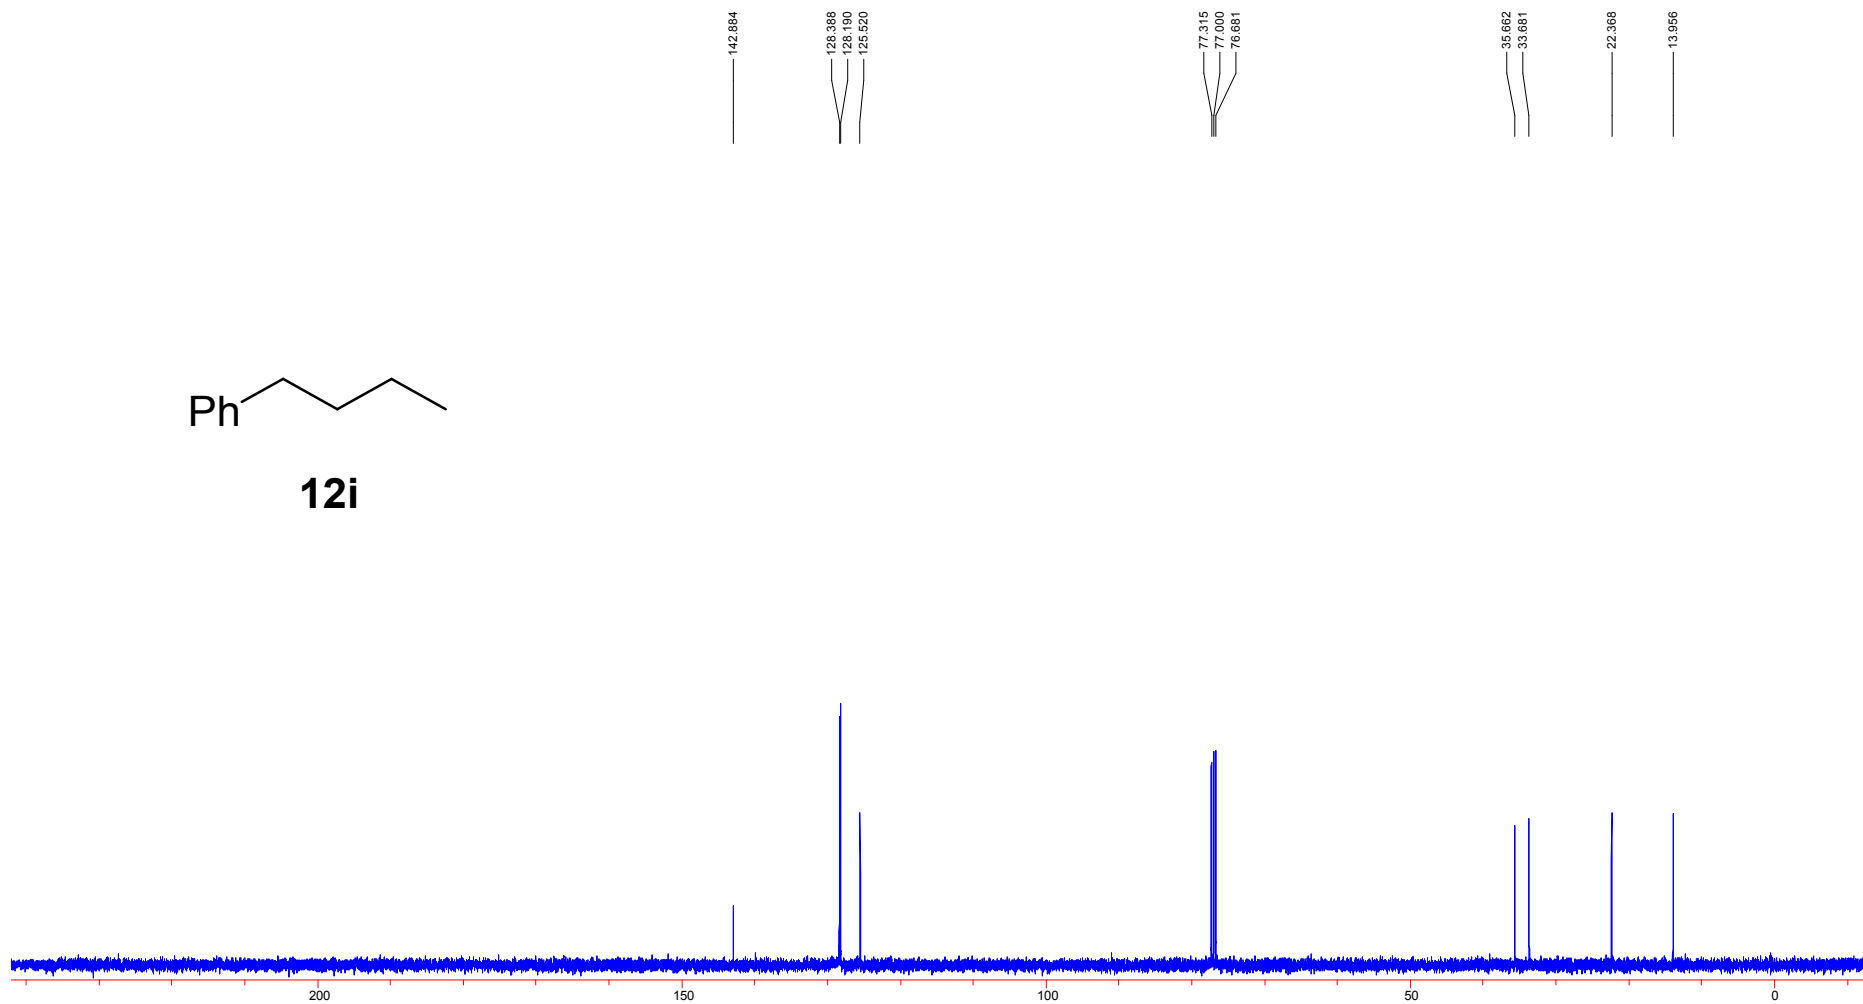

TIPS 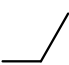  
**12j**

1.038  
1.013  
0.993  
0.973  
0.631  
0.611  
0.591  
0.571

21.12

3.18

2.00

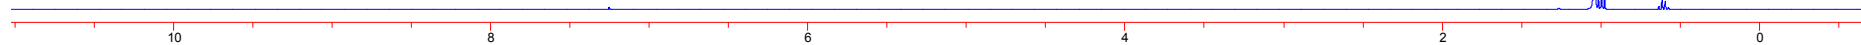

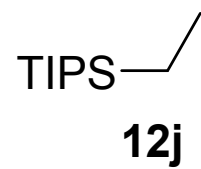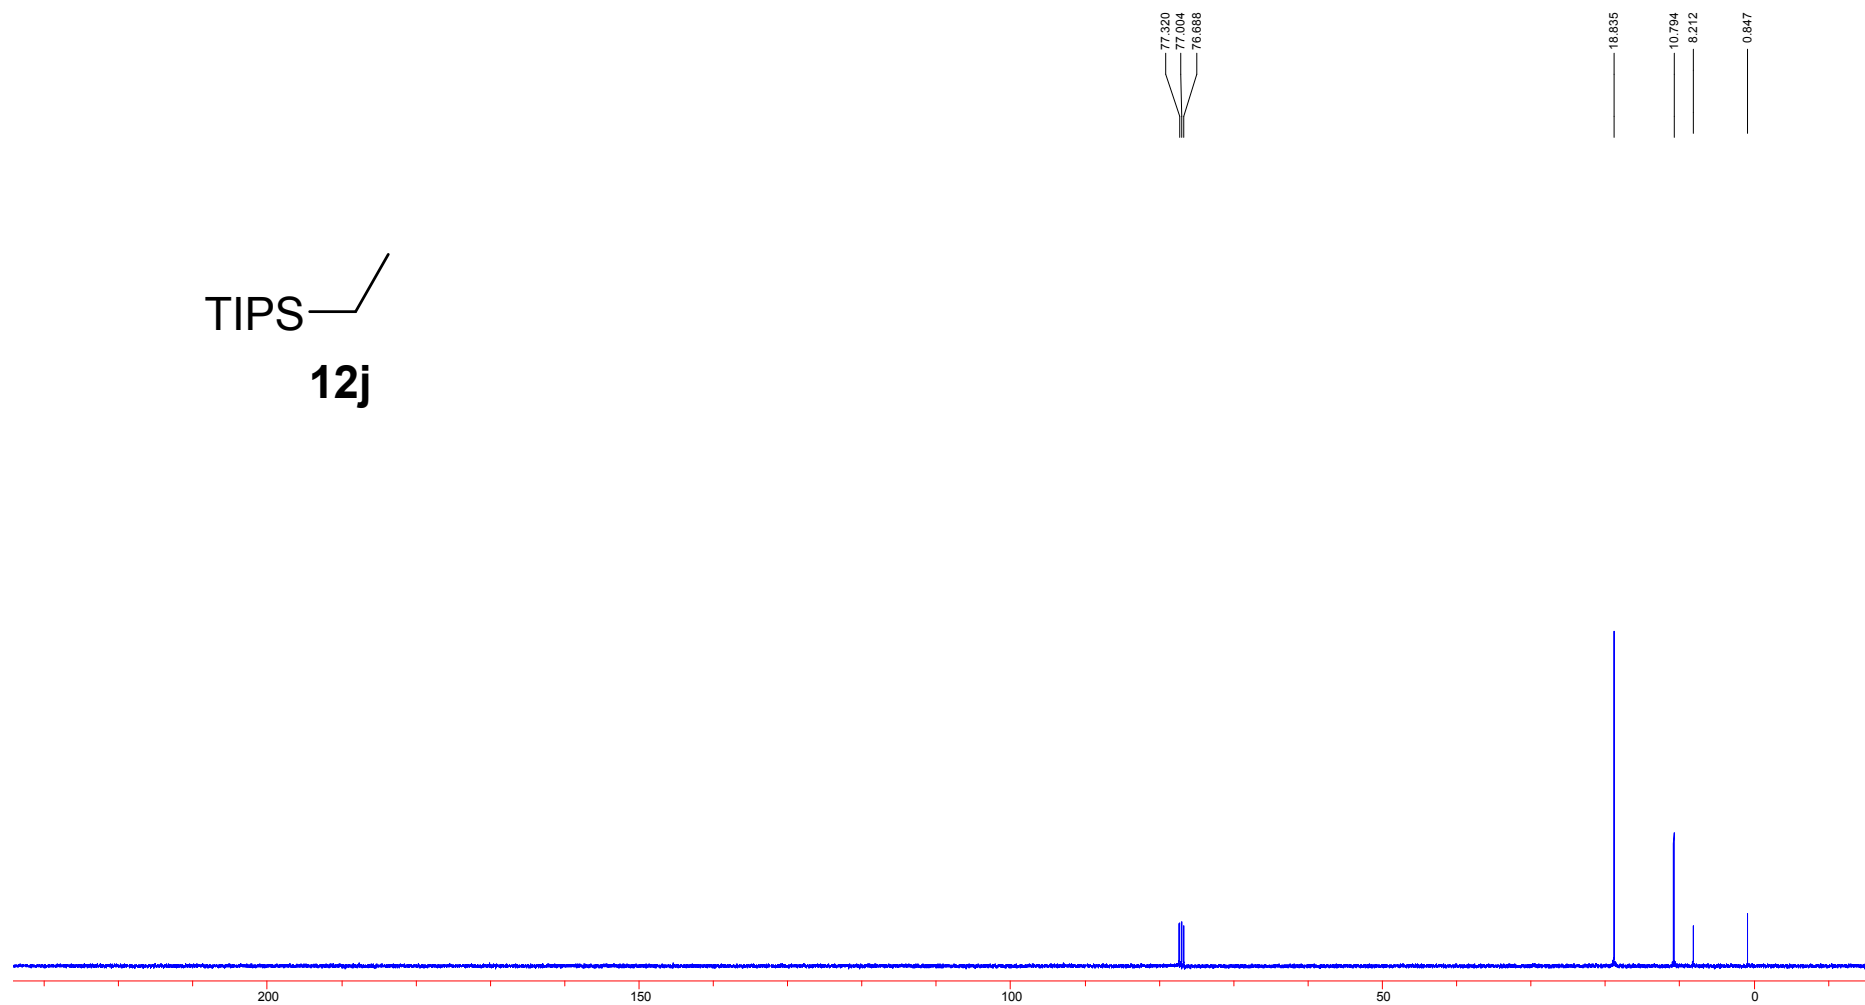

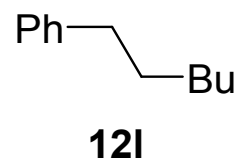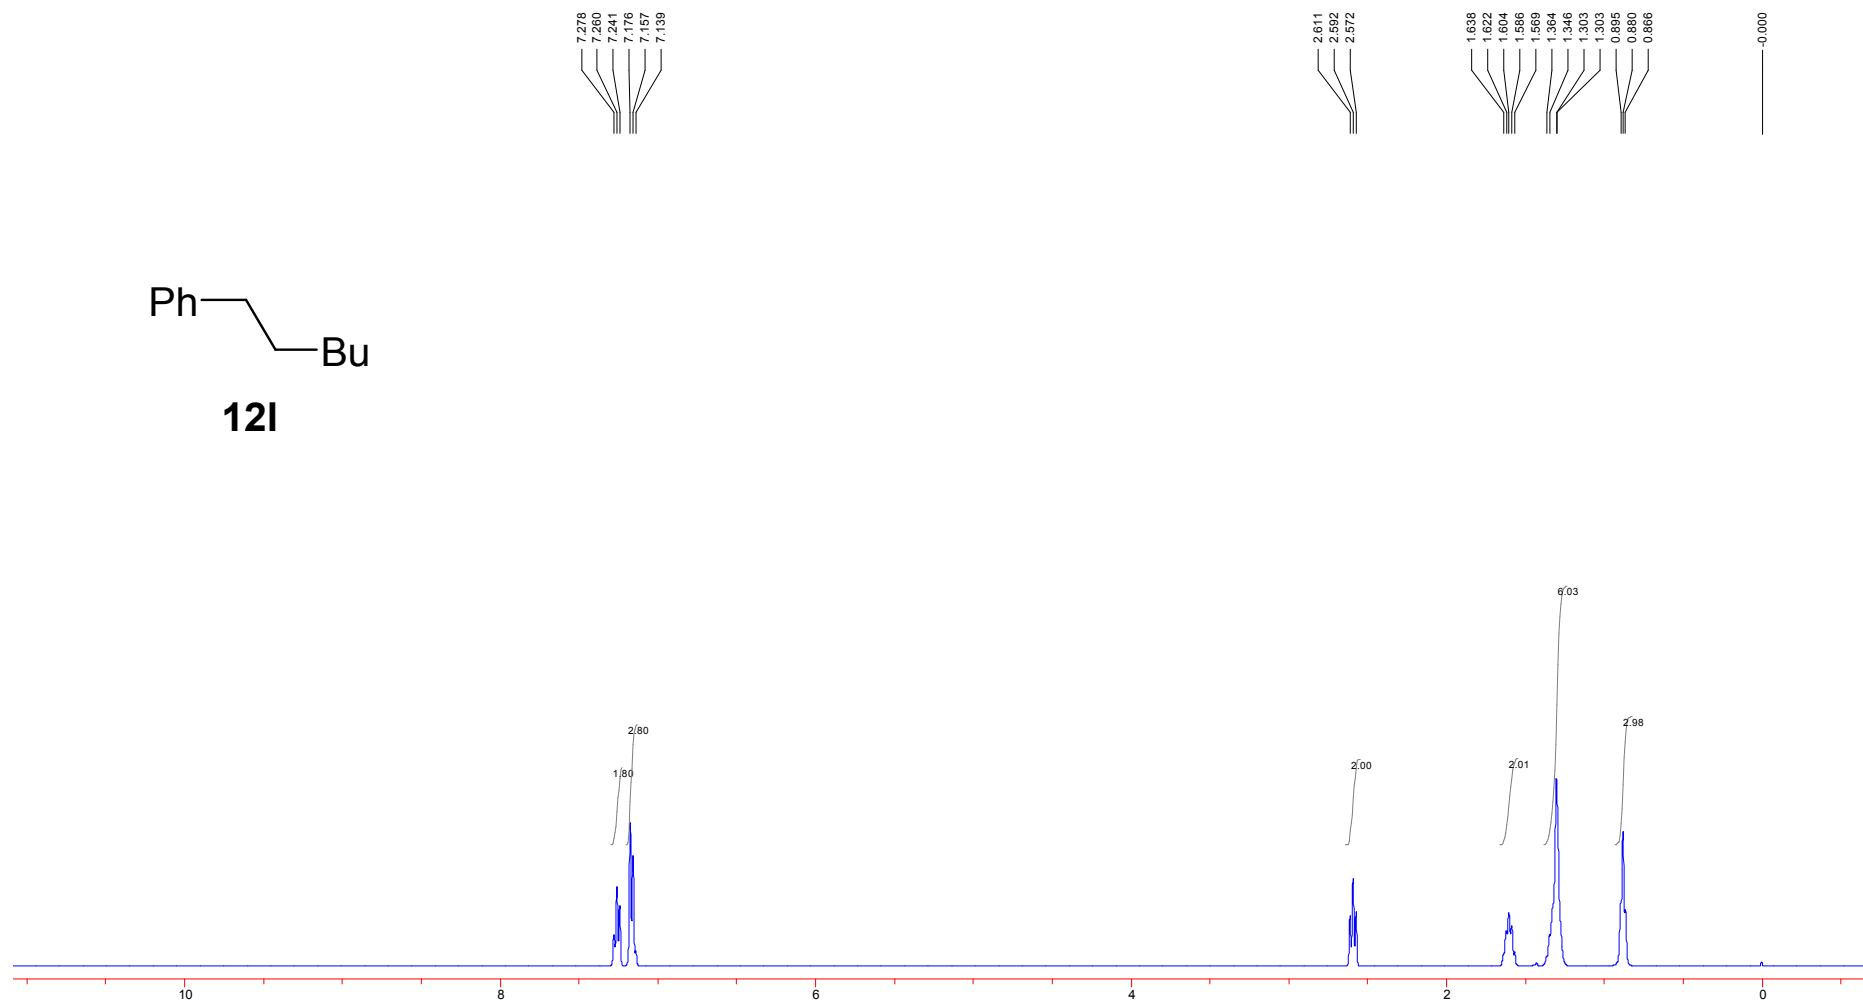

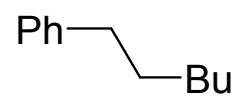

**12l**

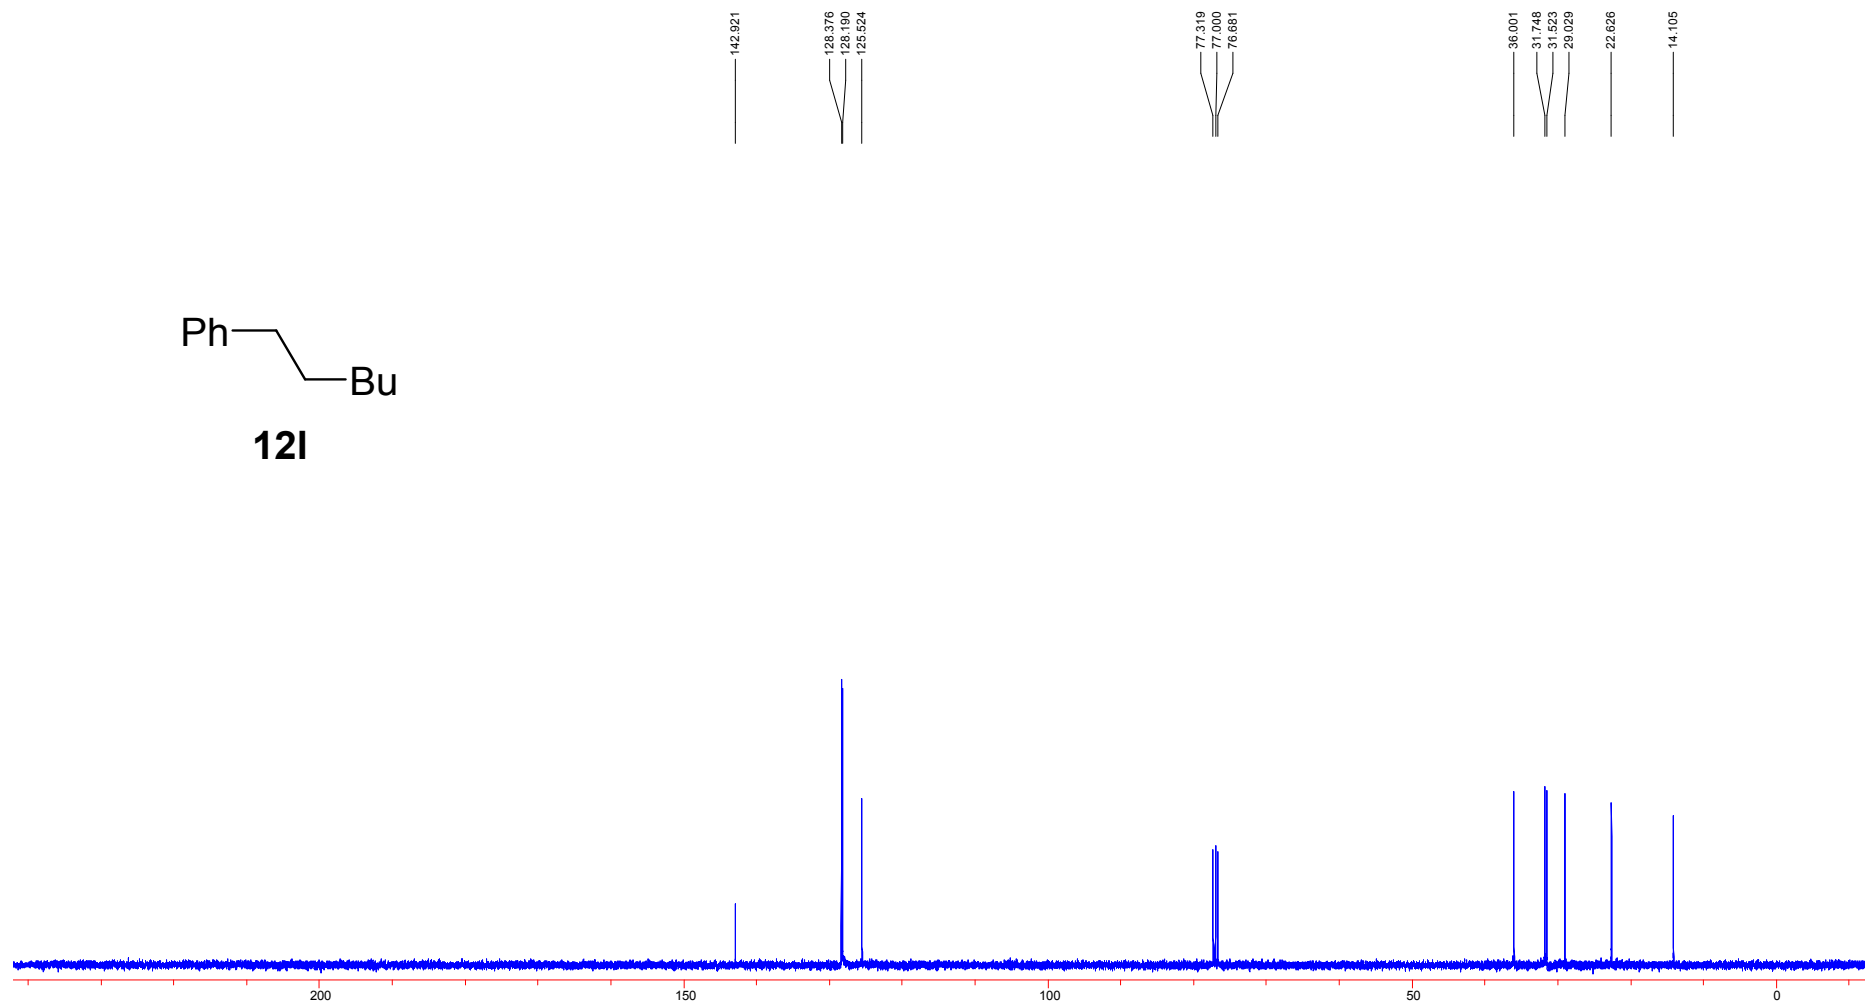

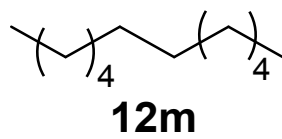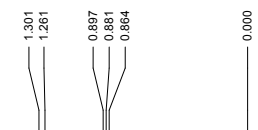

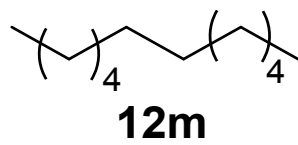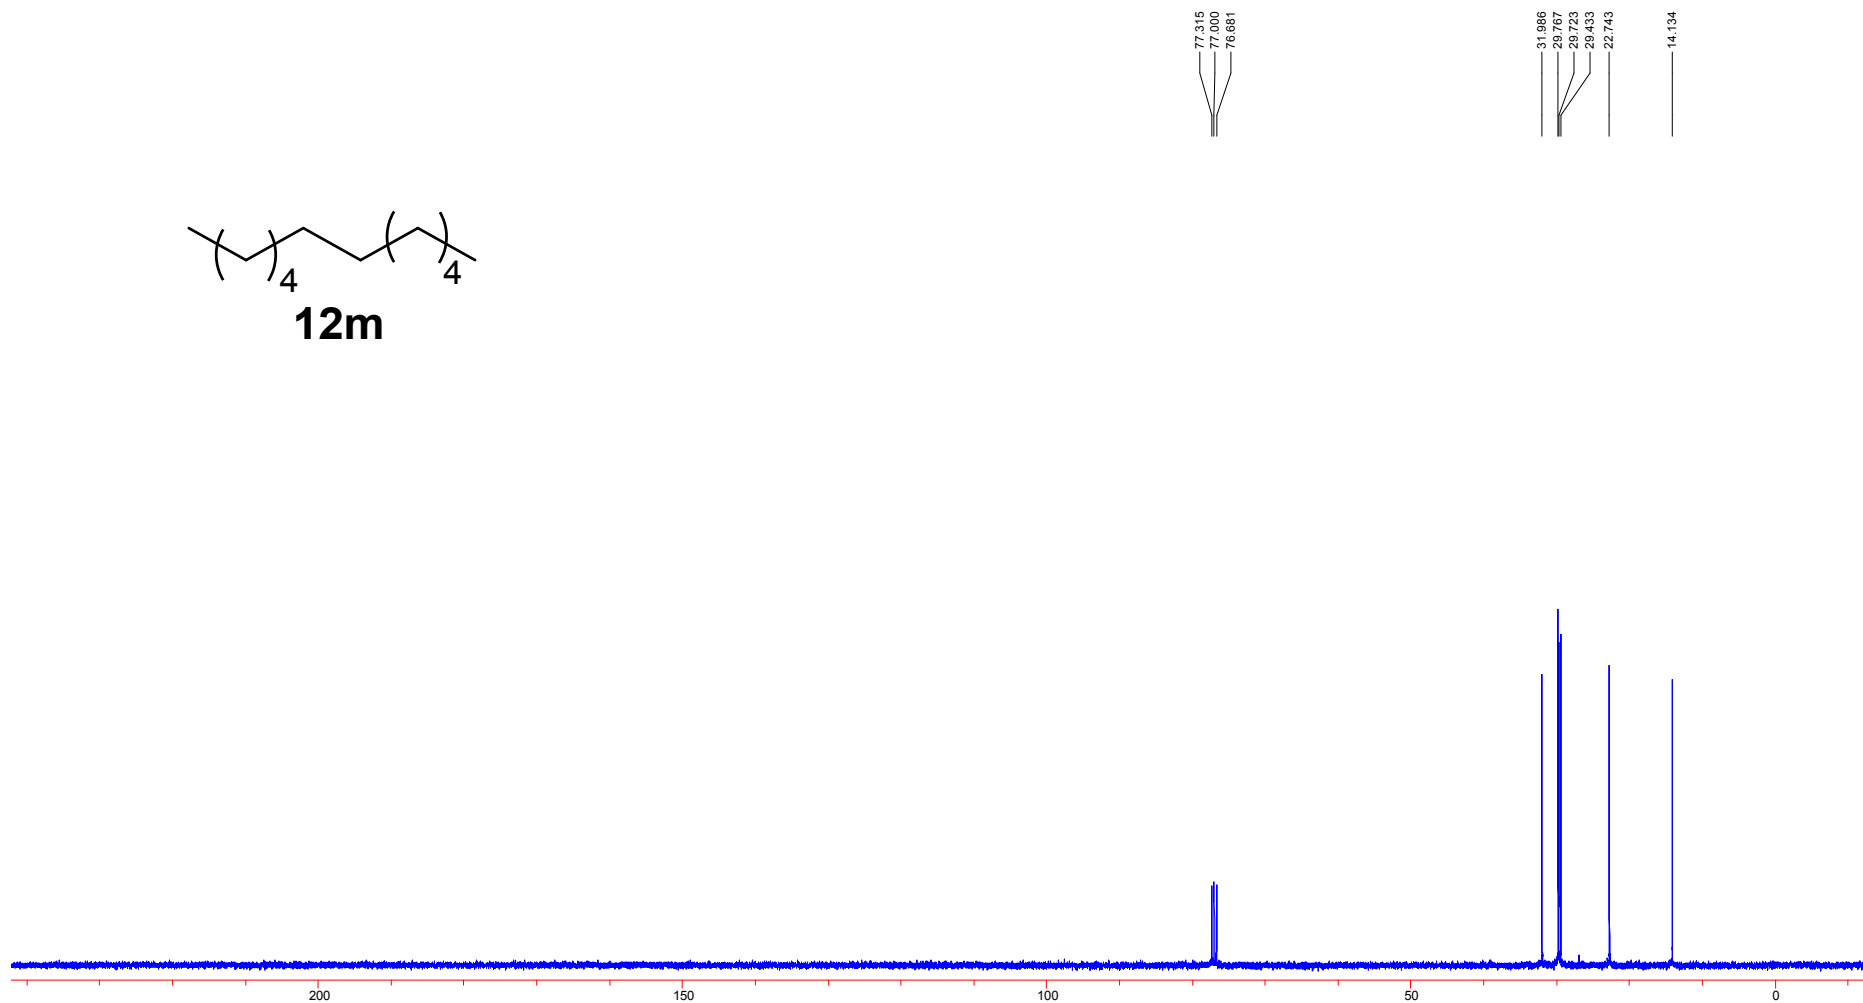

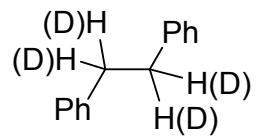

**6a-d**

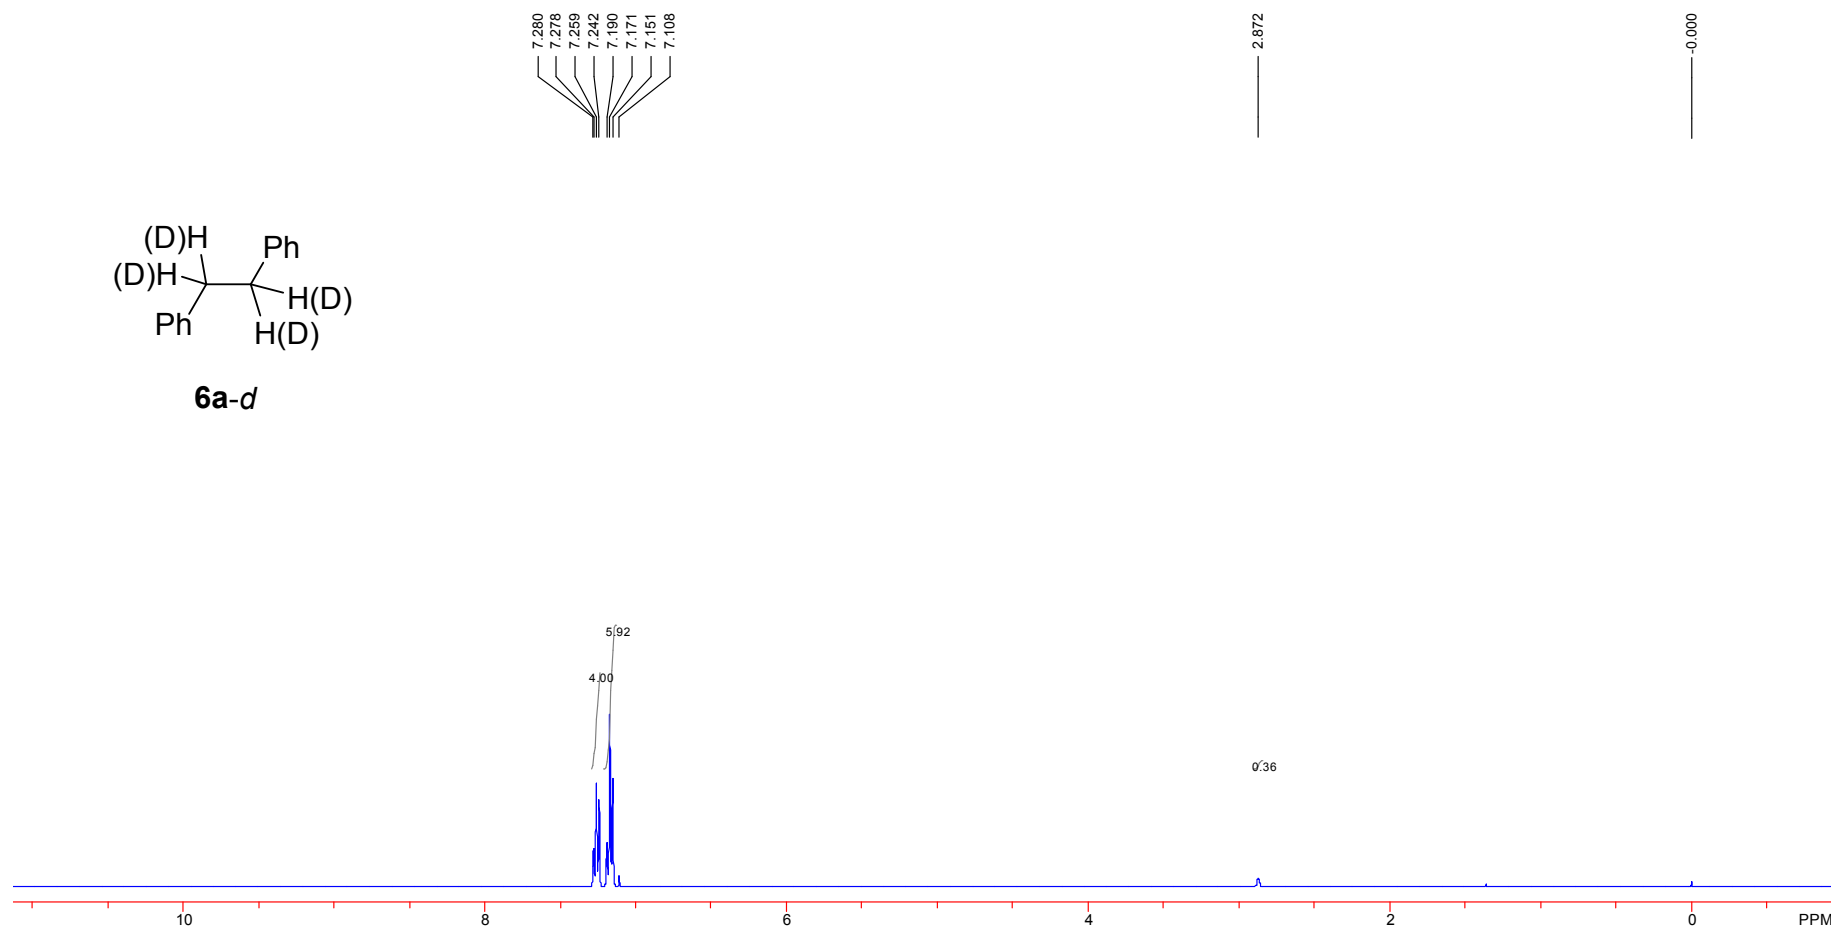

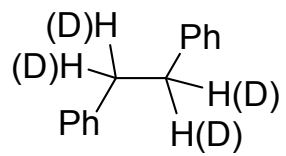

**6a-d**

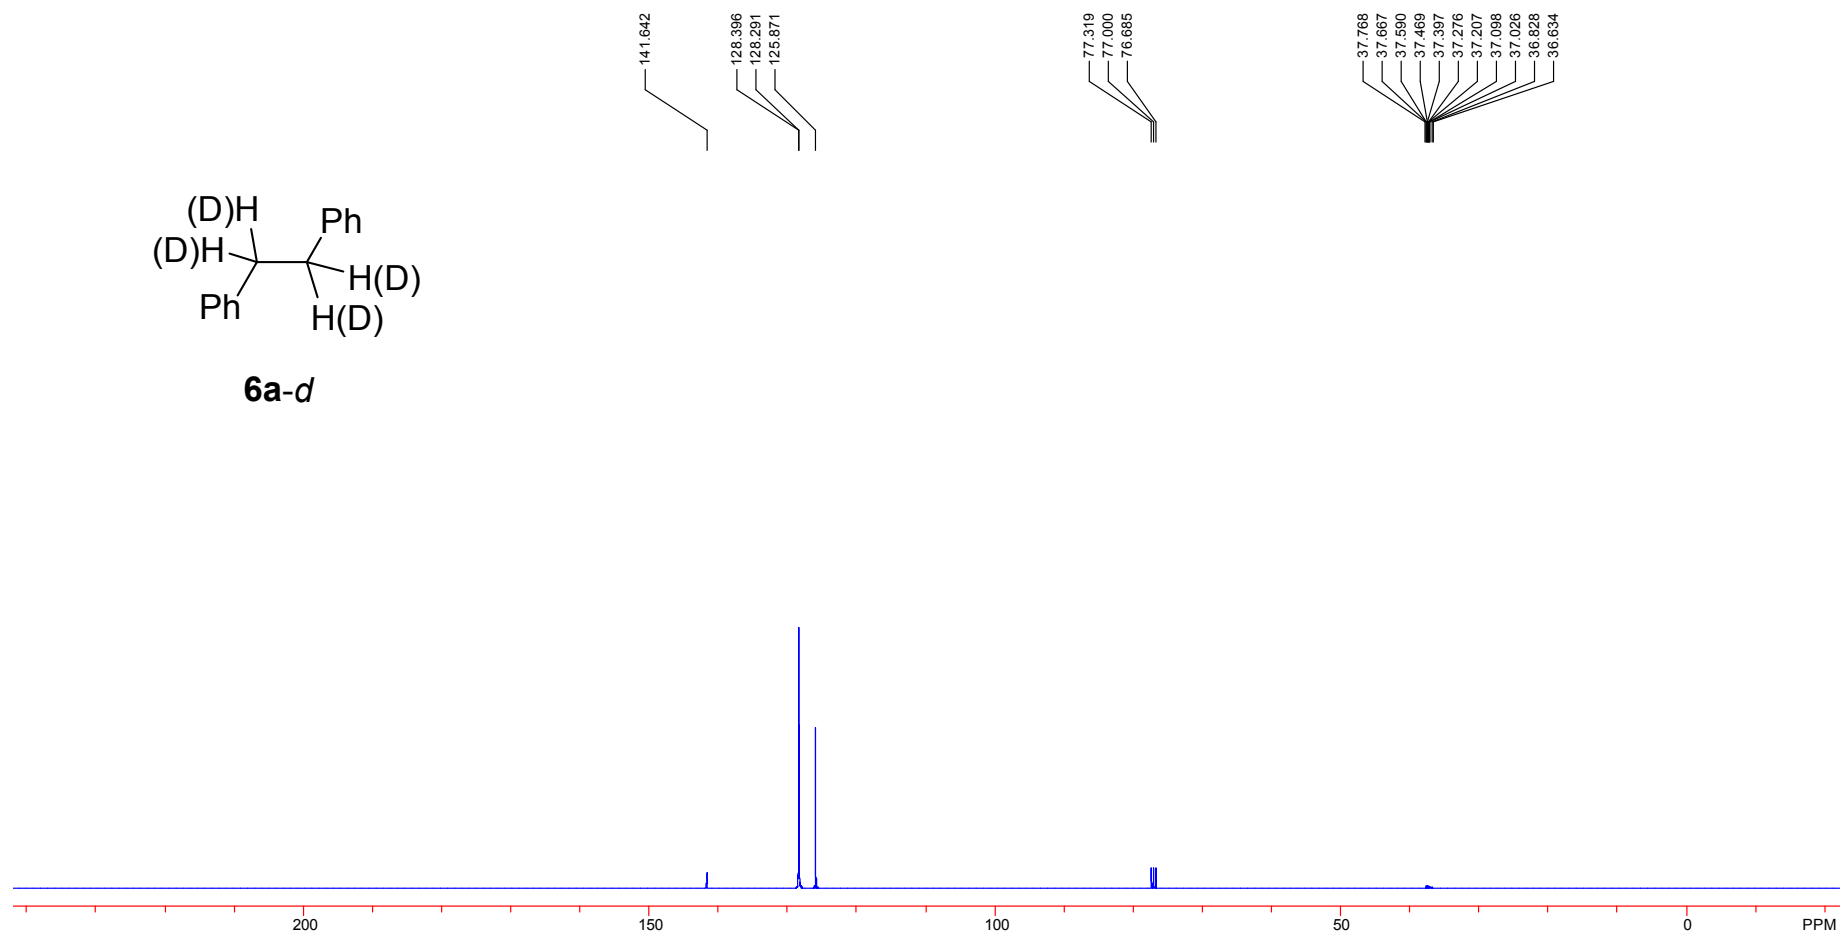

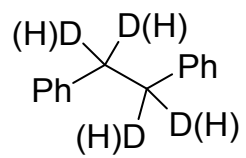

**6a-d'**

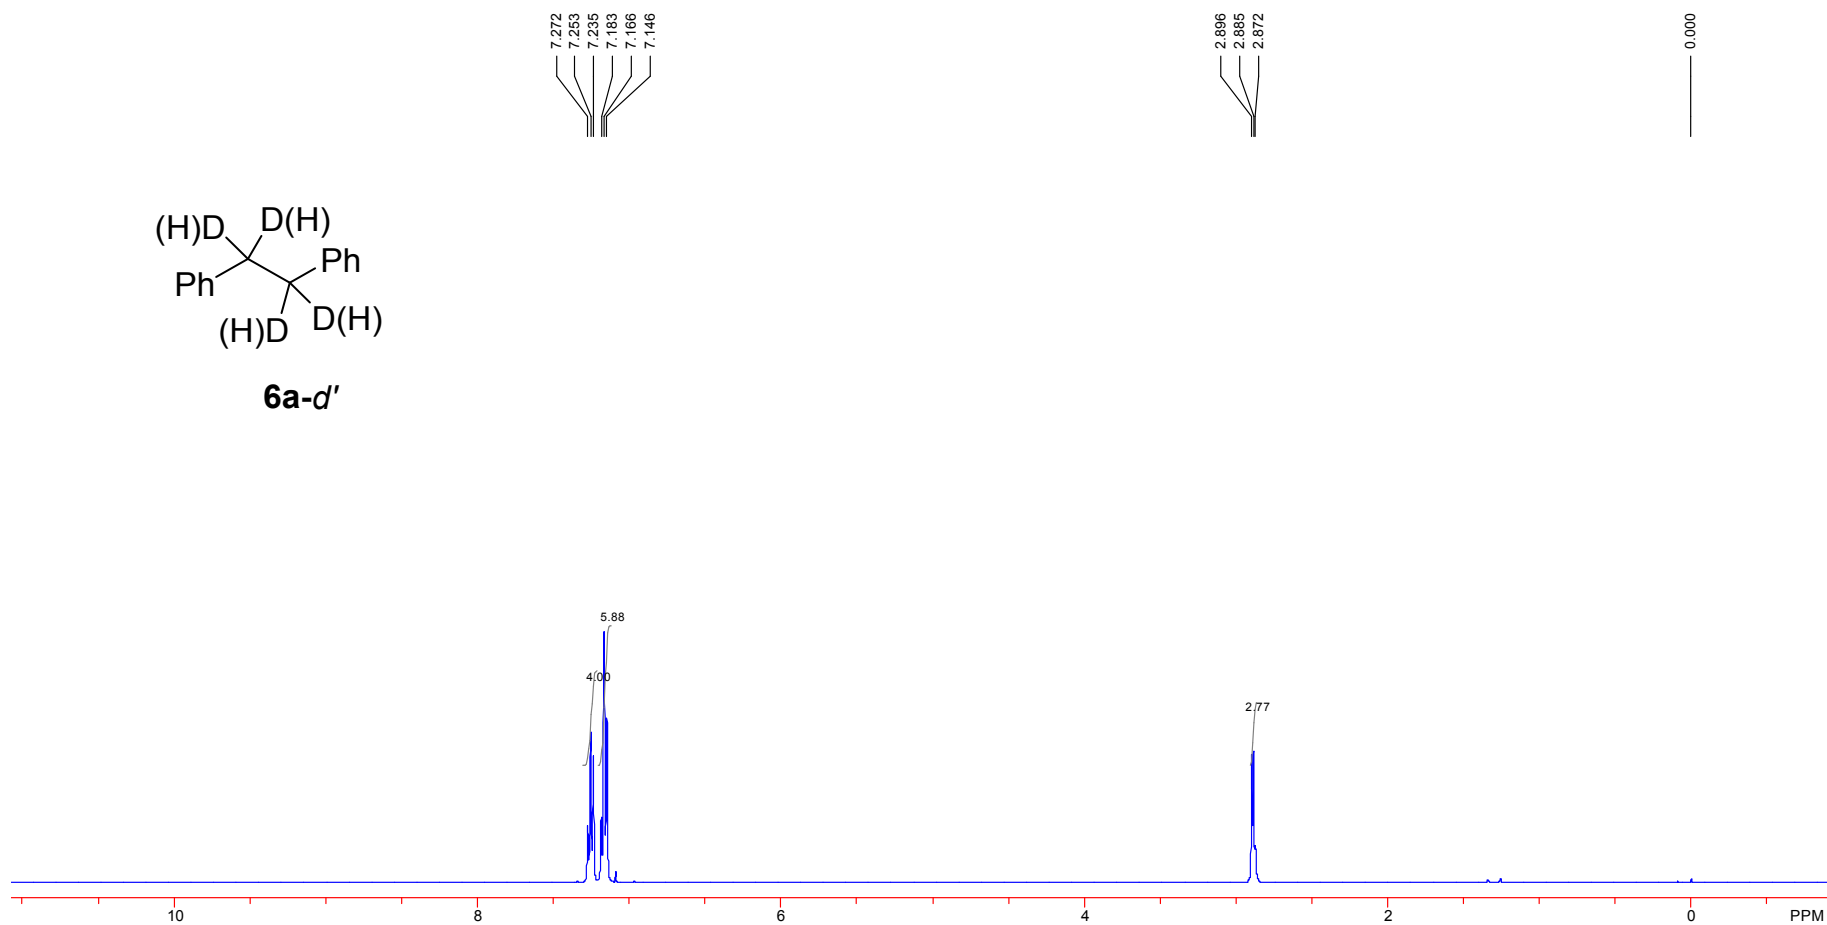

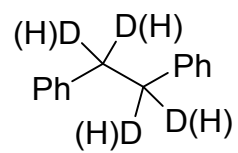

**6a-d'**

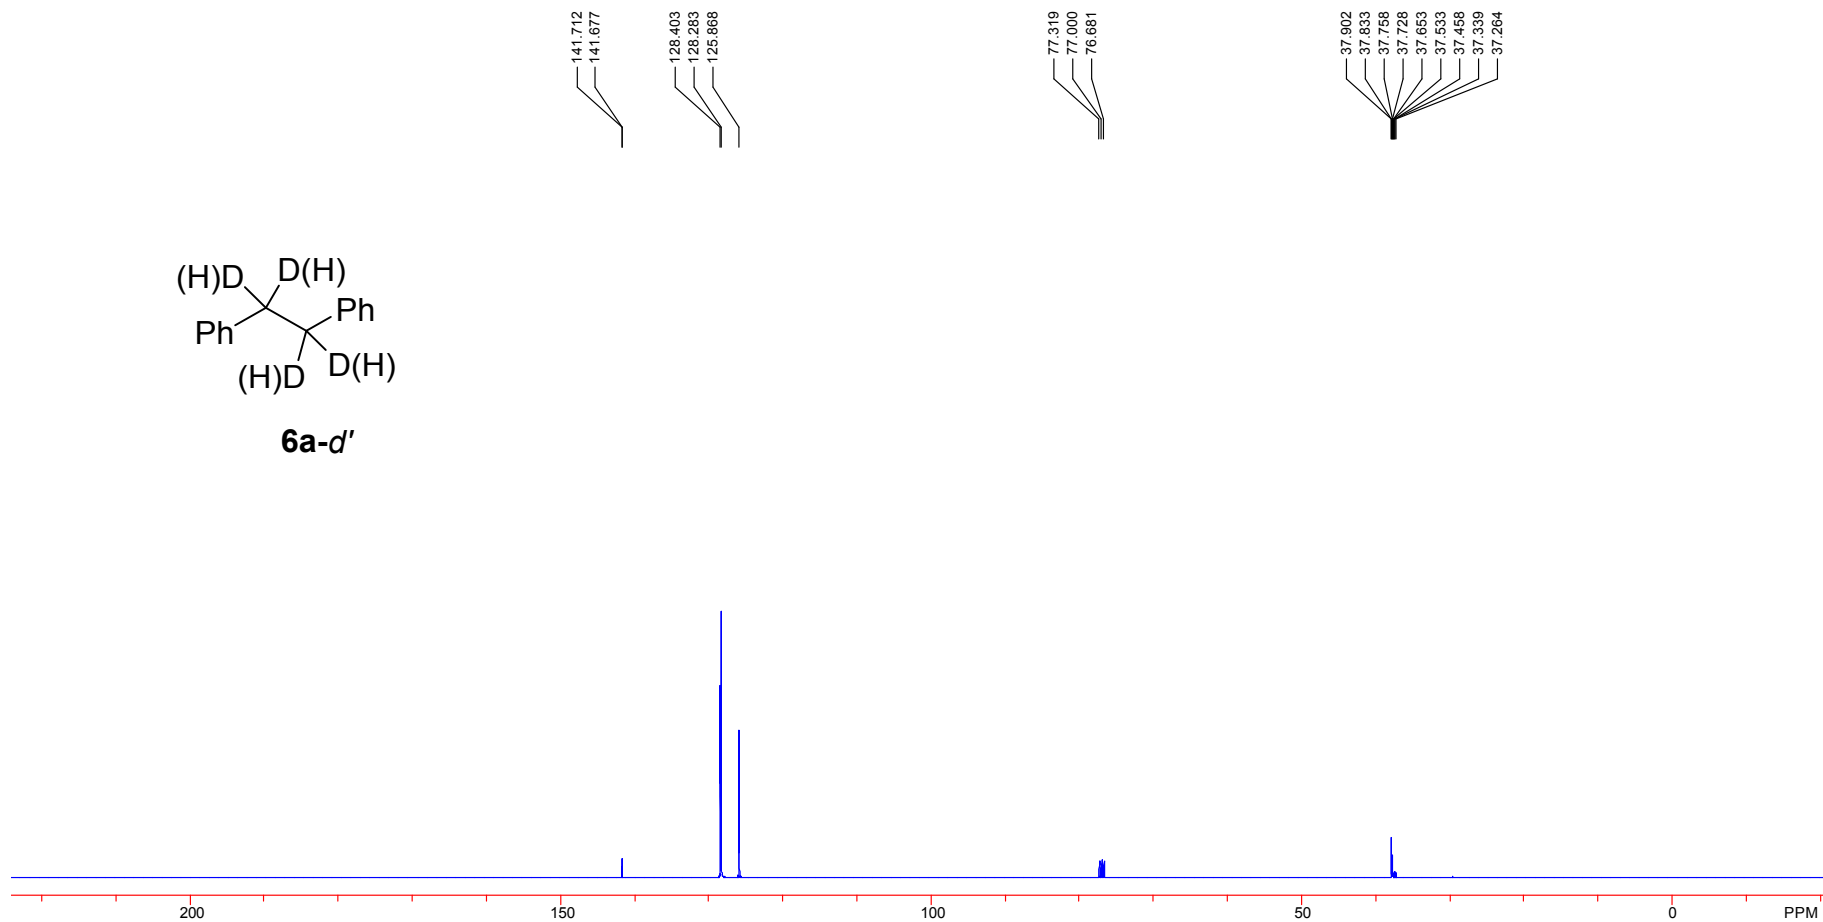

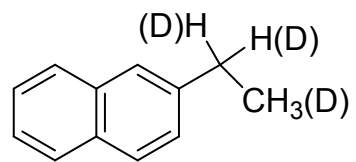

**2a-d, 92%**

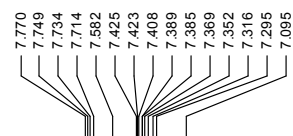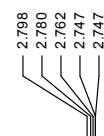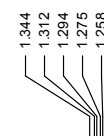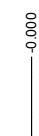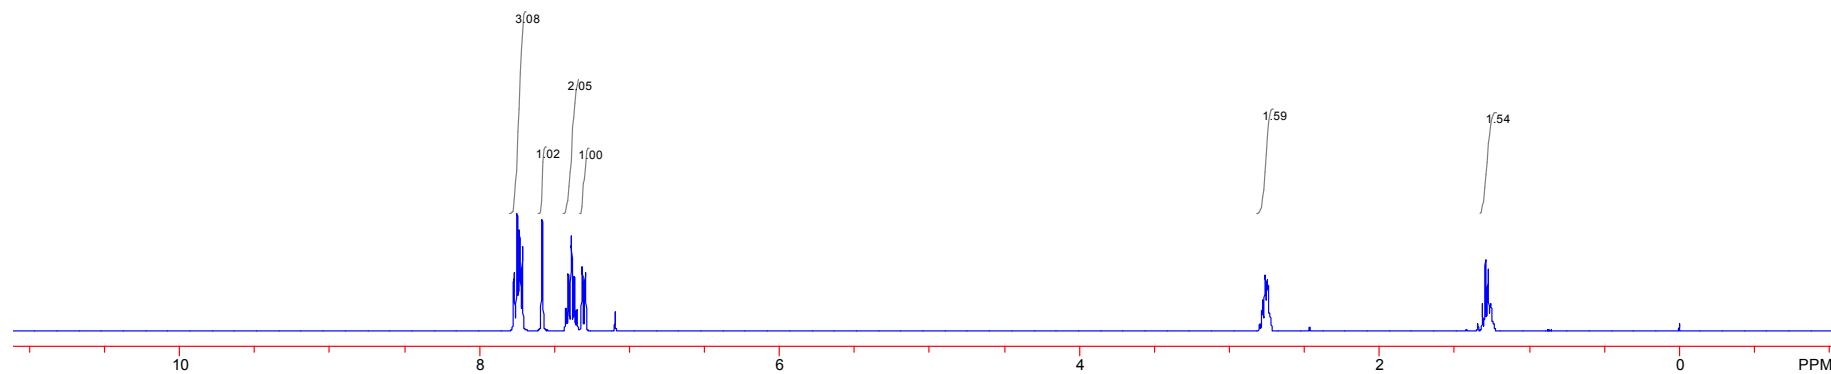

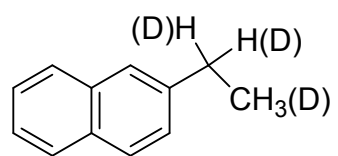

**2a-d**, 92%

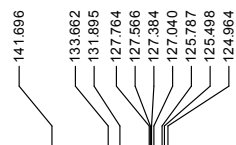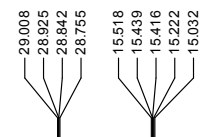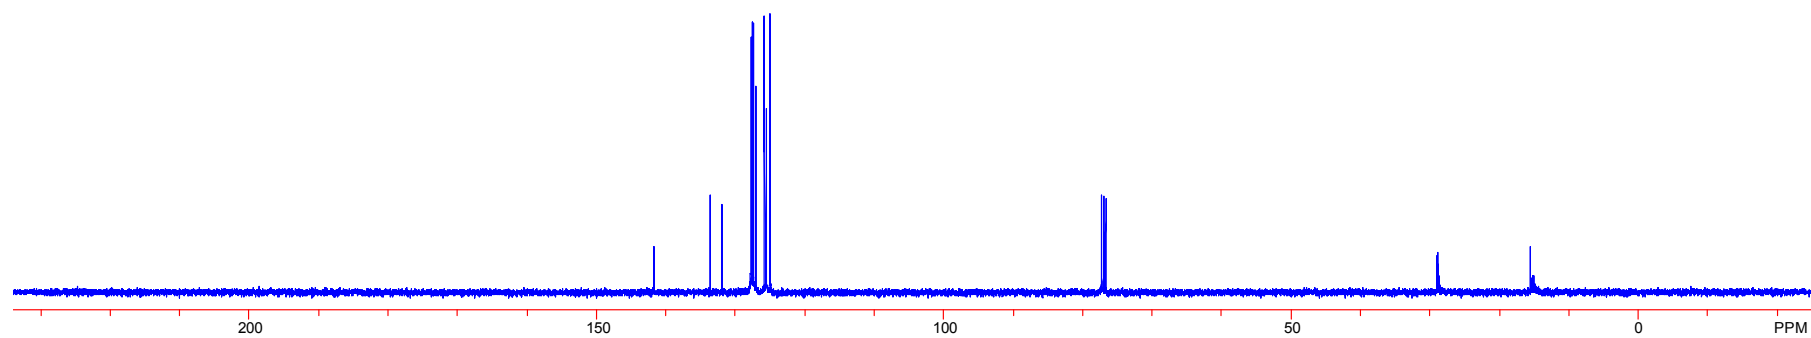

Supplement: c9qo00616h1.pdf [file c9qo00616h1.pdf]
